# Supplementary material
Source: PubMed Central journal article supplement (PMC4012489)
Supplement: supp_114.163477_FigureS1.pdf [file supp_114.163477_FigureS1.pdf]

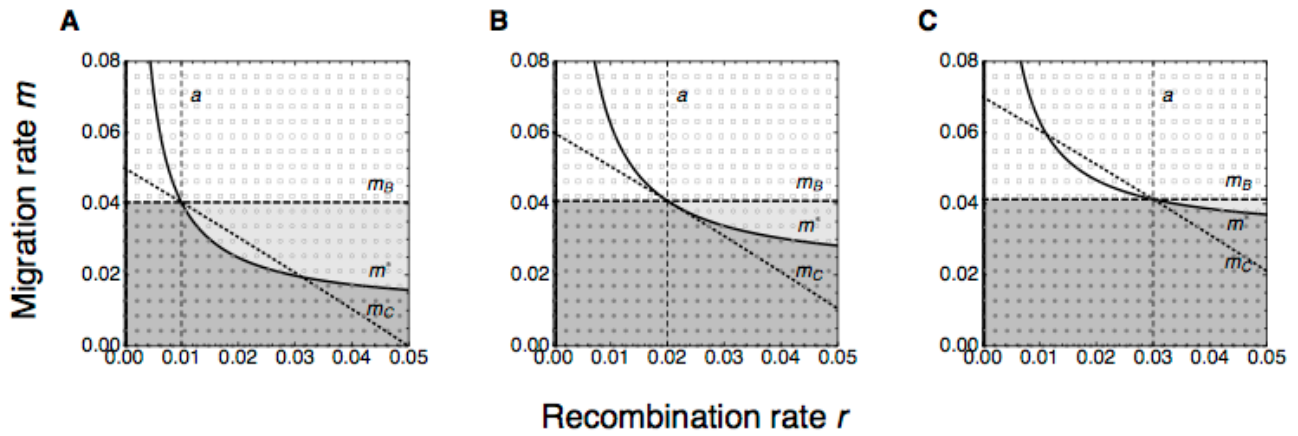

**Figure S1** Critical migration rates and invasion of  $A_1$  for a monomorphic continent. Dark grey: invasion of  $A_1$  via the unstable marginal equilibrium  $E_B$ ; light grey: no invasion of  $A_1$ , stable marginal equilibrium  $E_B$ ; white: no invasion, fixation of continental haplotype  $A_2B_2$  and convergence to the monomorphic equilibrium  $E_C$ , at which the island population is fixed for the continental haplotype  $A_2B_2$ . Numerical iterations of invasion dynamics were performed at coordinates indicated by grey symbols (File S2). Different symbols show which equilibrium is reached:  $\bullet E_+$ ;  $\circ E_B$ ;  $\square E_C$ . Initial values for iterations were  $\{p_0, q_0, D_0\} = \{0, \hat{q}_B, 0\}$ , where  $\hat{q}_B$  is the frequency of  $B_1$  at  $E_B$ . Iterations were stopped when successive changes in each coordinate became smaller than the numerical machine precision. The thick, almost-vertical line close to  $r = 0$  is for the critical migration rate  $m^*$ . This curve crosses the  $r$  axis at  $r = a(b - a)/(1 - 2a + b)$ , which is denoted by a vertical dashed line that can hardly be seen. The second vertical dashed line corresponds to  $r = a$ . (A)  $a = 0.01, b = 0.04$ . (B)  $a = 0.02, b = 0.04$ . (C)  $a = 0.03, b = 0.04$ .
