# Supplementary material
Source: PubMed Central journal article supplement (PMC4012489)
Supplement: supp_114.163477_FigureS3.pdf [file supp_114.163477_FigureS3.pdf]

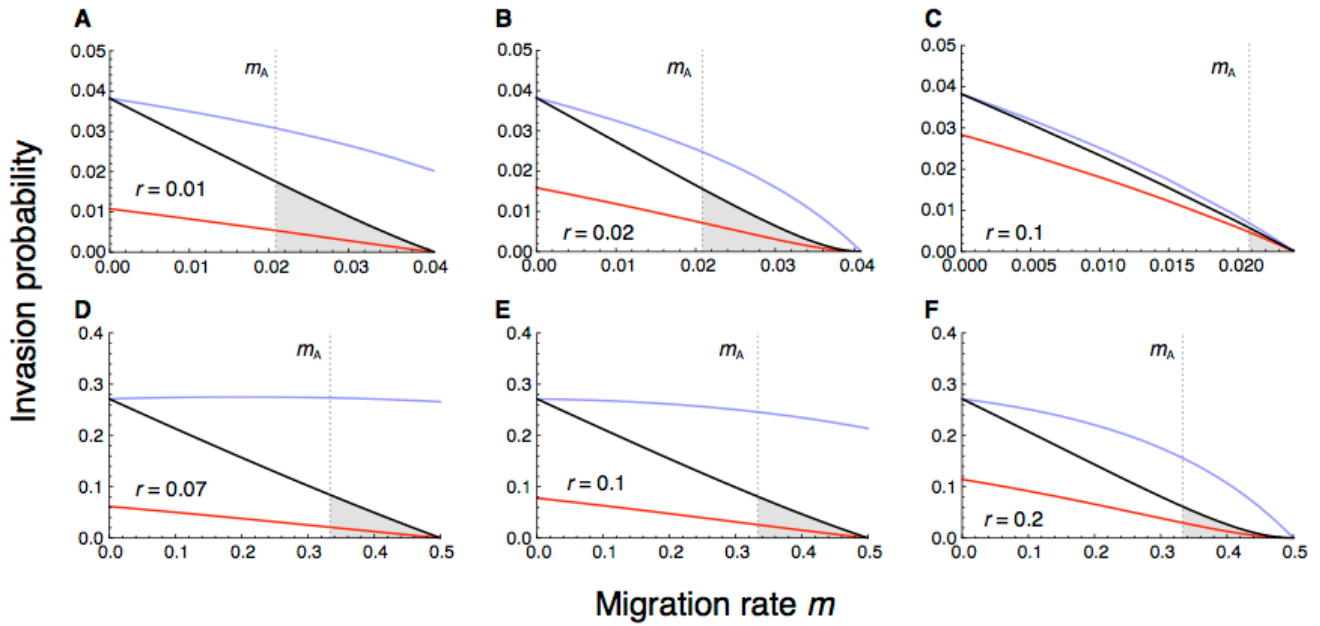

**Figure S3** Invasion probability of  $A_1$  as a function of the migration rate for a monomorphic continent. Shown are numerical solutions to the branching process, conditional on initial occurrence of  $A_1$  on background  $B_1$  (blue), on background  $B_2$  (red), and when averaged across backgrounds with weights determined by the equilibrium frequency  $\hat{q}_B$  of  $B_1$  (black). The vertical dashed line shows  $m_A = a/(1 - b)$ , the critical migration rate below which  $A_1$  can invade without linkage to the background locus. The shaded area thus indicates where  $A_1$  has a non-zero average invasion probability exclusively due to linkage to locus B. (A)–(C) Weak selection:  $a = 0.02$ ,  $b = 0.04$  and  $r$  as given in the panels. (D)–(F) Strong selection:  $a = 0.2$ ,  $b = 0.4$  and  $r$  as given in the panels. In this case, if linkage is tight ( $r$  small), the invasion probability conditional on the beneficial background increases with  $m$  as long as  $m$  is sufficiently small, and only starts decreasing if  $m$  is much larger (blue curve in panel D). This is because migration reduces the fitness of the resident population (consisting of  $A_2B_1$  and  $A_2B_2$ ) more strongly than it reduces the marginal fitness of type  $A_1B_1$ , which is favourable to type  $A_1B_1$ . As migration becomes stronger, though, the reduction in marginal fitness of  $A_1B_1$  becomes dominant. The parameter combination in (D) was arbitrarily chosen to illustrate this effect (for a detailed explanation, see section 5 of File S1). For  $r < 0.07$ , the maximum of the blue curve is shifted further to the right.
