# Supplementary material
Source: PubMed Central journal article supplement (PMC4012489)
Supplement: supp_114.163477_FigureS5.pdf [file supp_114.163477_FigureS5.pdf]

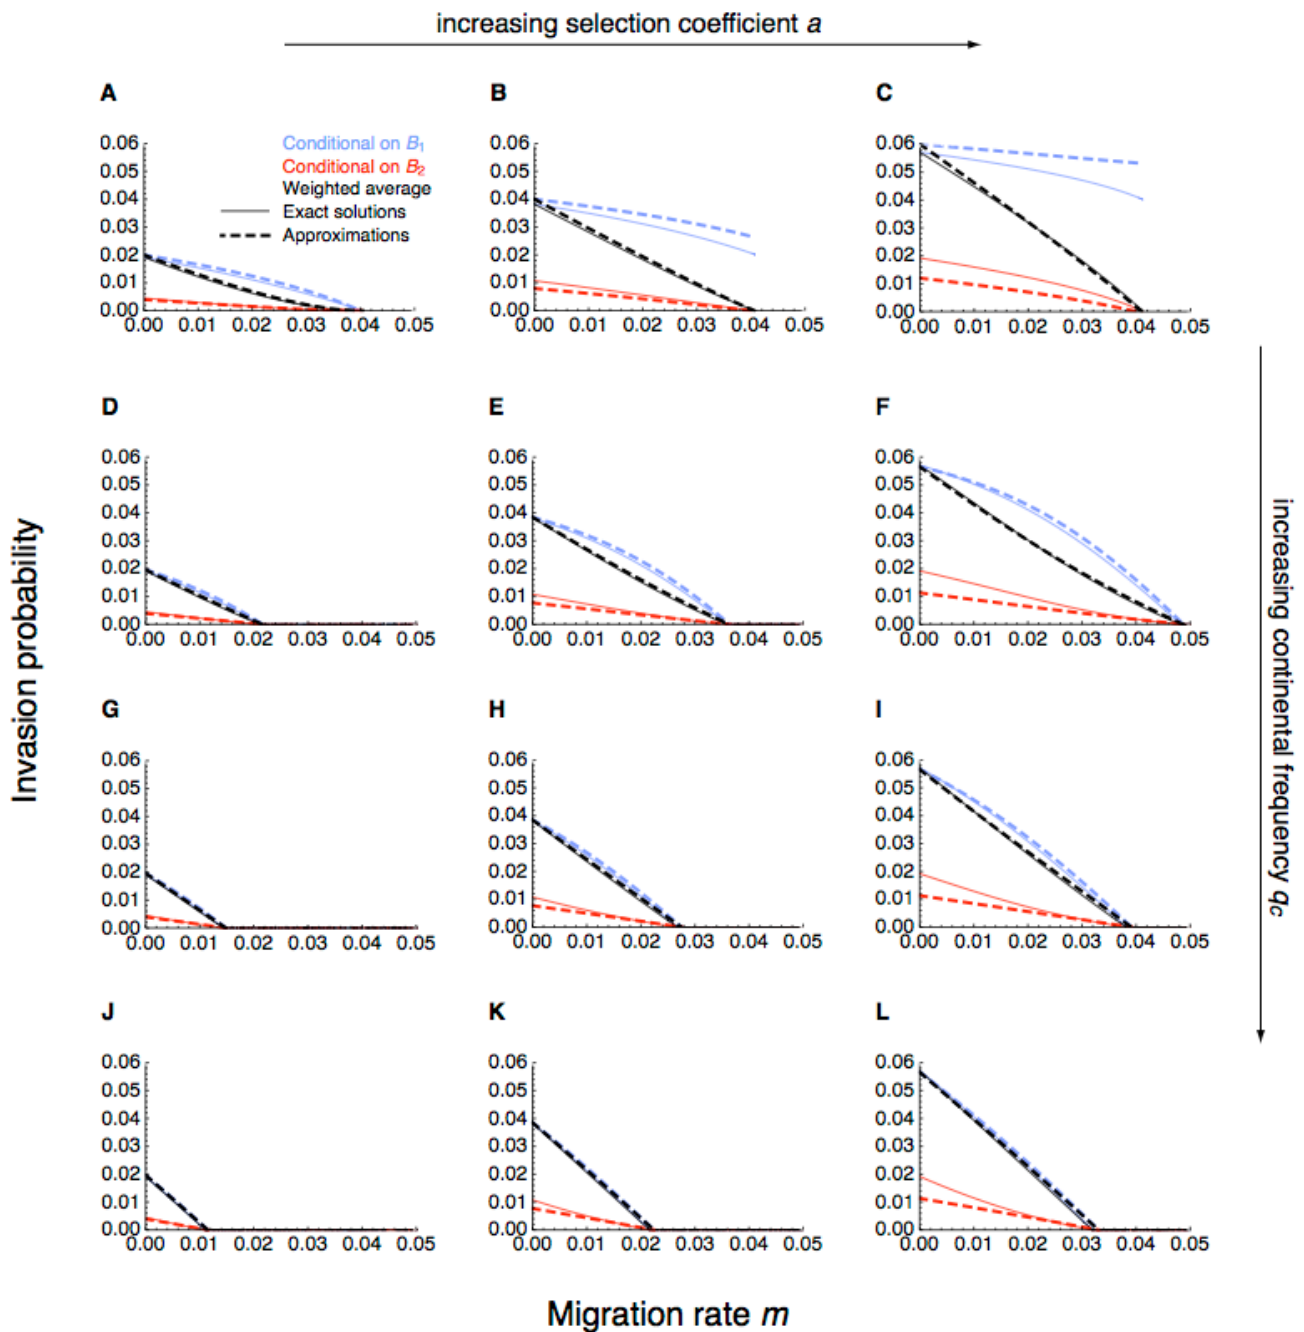

**Figure S5** Invasion probability of  $A_1$  as a function of the migration rate. Panels are for varying selective advantage  $a$  and continental frequency  $q_c$  of the beneficial background allele  $B_1$ . Invasion probabilities are shown conditional on initial occurrence of  $A_1$  on background  $B_1$  (blue), on background  $B_2$  (red), and as a weighted average across the two backgrounds (black). Solid curves show exact numerical solutions to the branching process, whereas thick dashed curves show the analytical approximations valid for weak evolutionary forces and a slightly supercritical branching process (see section 4 of File S1, and Eqs. 7–9 in File S5). In all panels,  $b = 0.04$  and  $r = 0.01$ . The selective advantage  $a$  of  $A_1$  increases from left to right, taking values of  $a = 0.01$  in panels (A), (D), (G), (J),  $a = 0.02$  in panels (B), (E), (H), (K), and  $a = 0.03$  in panels (C), (F), (I) and (L). The continental frequency  $q_c$  of  $B_1$  increases from top to bottom, taking values of  $q_c = 0$  in panels (A)–(C),  $q_c = 0.2$  in panels (D)–(F),  $q_c = 0.5$  in panels (G)–(I), and  $q_c = 0.8$  in panels (J)–(L).
