# Supplementary material
Source: PubMed Central journal article supplement (PMC4012489)
Supplement: supp_114.163477_FigureS12.pdf [file supp_114.163477_FigureS12.pdf]

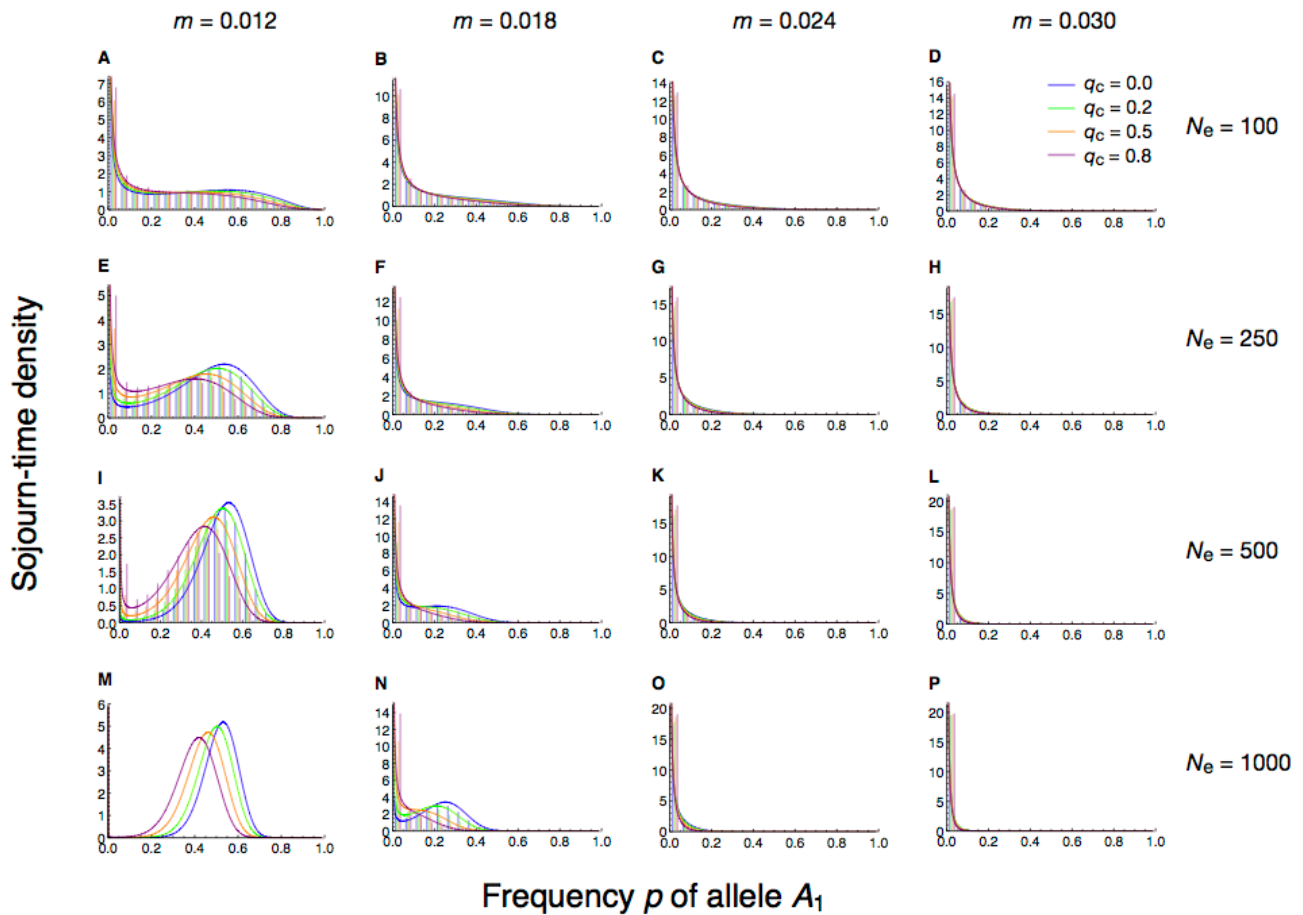

**Figure S12** Comparison of analytical and simulated sojourn-time densities of  $A_1$  for a polymorphic continent. Results are shown for various migration rates  $m$  and continental frequencies  $q_c$  of  $B_1$ . Histograms were obtained from  $10^6$  simulations (see Methods) and curves give the diffusion approximation under the assumption of quasi-linkage equilibrium,  $\tilde{t}_{2, \text{QLE}}(p; p_0)$ , from Eq. (109). Throughout,  $a = 0.02$ ,  $b = 0.04$ ,  $r = 0.1$  and  $p_0 = 1/(2N)$  (we assumed  $N_e = N$ ). From the top to the bottom row, the effective population size  $N_e$  increases and therefore genetic drift becomes less important. From the left to the right column, the migration rate  $m$  increases, making it more difficult for  $A_1$  to survive. No simulations were completed for the parameter combination in panel (M), as they were too time-consuming.
