# Supplementary material
Source: PubMed Central journal article supplement (PMC4012489)
Supplement: supp_114.163477_FigureS14.pdf [file supp_114.163477_FigureS14.pdf]

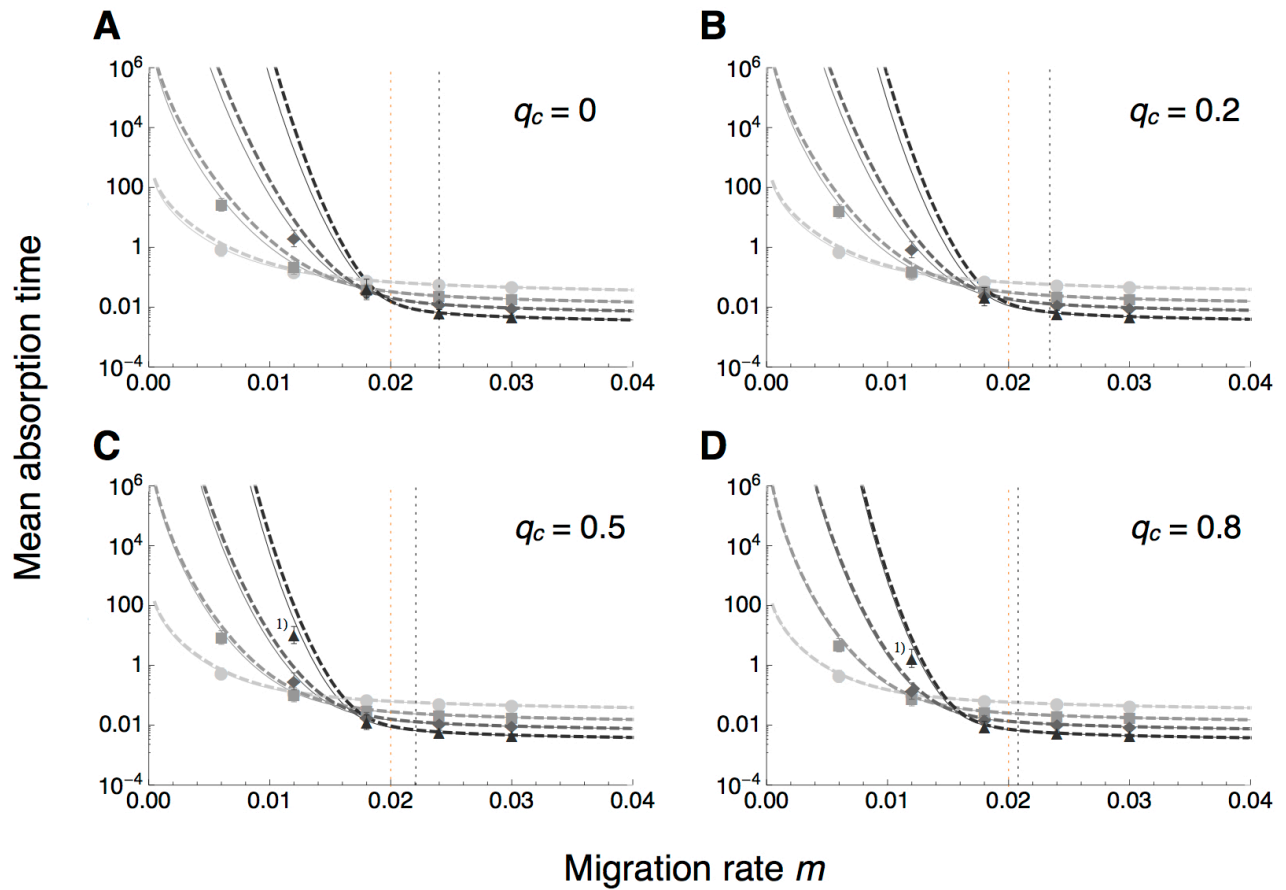

**Figure S14** Mean absorption time of  $A_1$  as a function of the migration rate. Two approximations derived under the assumption of quasi-linkage equilibrium (QLE) are compared. Solid curves show  $\bar{t}_{\text{QLE}}$  (Eq. 8) and thick dashed curves  $\bar{t}_{\text{QLE}, \rho \gg 0}$  (Eq. 114 in File S1). The effective population size  $N_e$  increases from light to dark grey, taking values of 100, 250, 500, and 1000. The vertical dotted lines denote the critical values of  $m$  below which  $A_1$  can invade in the deterministic one-locus (orange) and two-locus (black) model. Dots and whiskers show the mean and 95% empirical interquartile range across 1000 runs of the mean absorption time in 1000 replicates per run. Where points and whiskers are missing, simulations could not be completed within the time limit of 72 hours per replicate on the computer cluster. Data points labelled by 1) are from parameter combinations for which fewer than 1000 replicates per run could be realised, because some took longer than the limit of 72 hours. (A) Monomorphic continent:  $q_c = 0$ . (B)–(D) Polymorphic continent with continental frequency of  $B_1$  equal to  $q_c = 0.2$ ,  $q_c = 0.5$ , and  $q_c = 0.8$ , respectively. Other parameters are  $a = 0.02$ ,  $b = 0.04$ ,  $r = 0.1$ , and  $p_0 = 1/(2N)$  (we assumed  $N_e = N$ ). Time is in multiples of  $2N_e$  generations and plotted on the log scale.
