# Supplementary material
Source: PubMed Central journal article supplement (PMC4012489)
Supplement: supp_114.163477_FigureS15.pdf [file supp_114.163477_FigureS15.pdf]

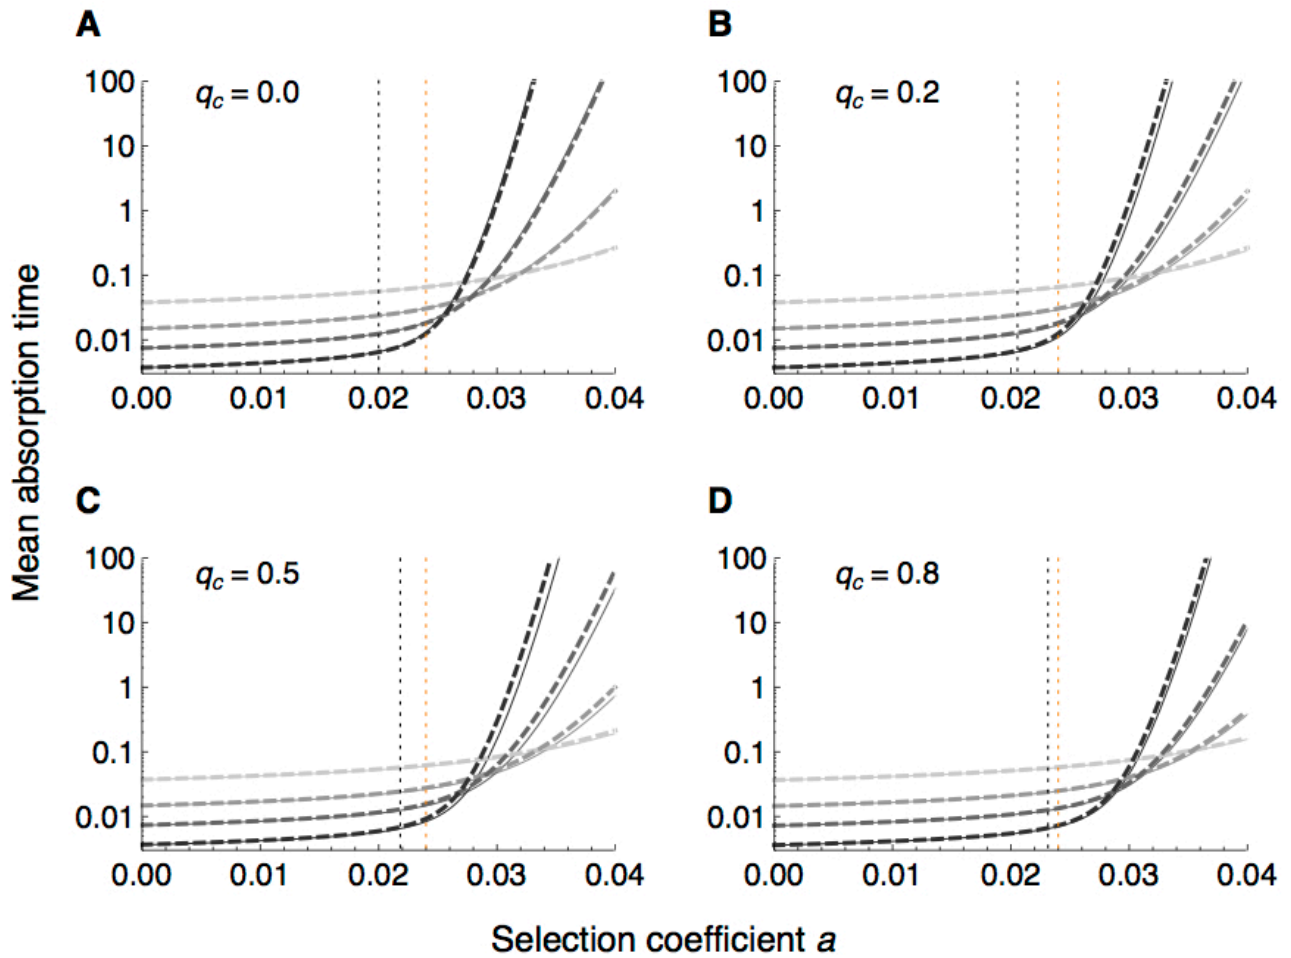

**Figure S15** Mean absorption time of  $A_1$  as a function of its selective advantage. Two approximations derived under the assumption of quasi-linkage equilibrium (QLE) are compared. Solid curves show  $\bar{t}_{QLE}$  (Eq. 8) and thick dashed curves show  $\bar{t}_{QLE, \rho \gg 0}$  (Eq. 114 in File S1). The effective population size  $N_e$  increases from light to dark grey, taking values of 100, 250, 500, and 1000. The vertical dotted lines denote the critical values of  $a$  above which  $A_1$  can invade in the deterministic one-locus (orange) and two-locus (black) model. (A) Monomorphic continent ( $q_c = 0$ ). (B)–(D) Polymorphic continent with  $q_c$  equal to 0.2 in (B), 0.5 in (C) and 0.8 in (D). Other parameters are  $b = 0.04$ ,  $m = 0.024$ ,  $r = 0.1$ , and  $p_0 = 1/(2N)$  (we assumed  $N_e = N$ ). Time is in multiples of  $2N_e$  generations and plotted on the log scale.
