# Supplementary material
Source: PubMed Central journal article supplement (PMC4012489)
Supplement: supp_114.163477_FigureS16.pdf [file supp_114.163477_FigureS16.pdf]

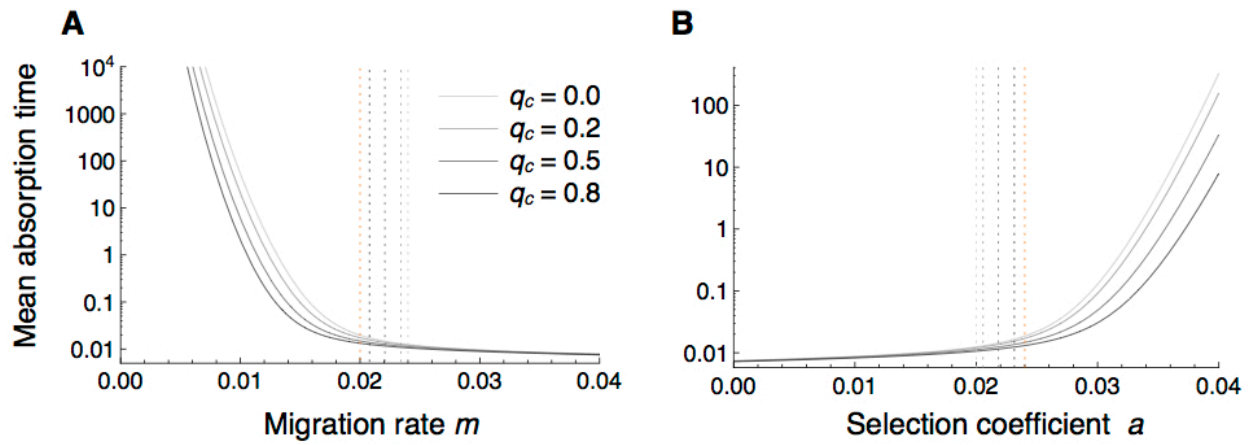

**Figure S16** Effect of the continental frequency  $q_c$  of  $B_1$  on the mean absorption time of  $A_1$ . Curves show the diffusion approximation  $\bar{t}_{\text{QLE}}$  (Eq. 8), derived under the assumption of quasi-linkage equilibrium. The continental frequency  $q_c$  of  $B_1$  increases from light to dark grey, taking values of 0, 0.2, 0.5, and 0.8. (A) The mean absorption time is given in multiples of  $2N_e$  generations as a function of the migration rate. Vertical dotted lines denote the critical values of  $m$  below which  $A_1$  can invade in the respective deterministic two-locus model (grey) and, as a reference, in the one-locus model (orange). The selection coefficient in favour of  $A_1$  is  $a = 0.02$ . (B) As in (A), but as a function of the selective advantage of allele  $A_1$ . The migration rate is  $m = 0.024$ . In both panels,  $b = 0.04$ ,  $r = 0.1$ ,  $N_e = 500$ , and  $p_0 = 1/(2N)$  (we assumed  $N_e = N$ ).
