# Supplementary material
Source: PubMed Central journal article supplement (PMC4012489)
Supplement: supp_114.163477_FigureS19.pdf [file supp_114.163477_FigureS19.pdf]

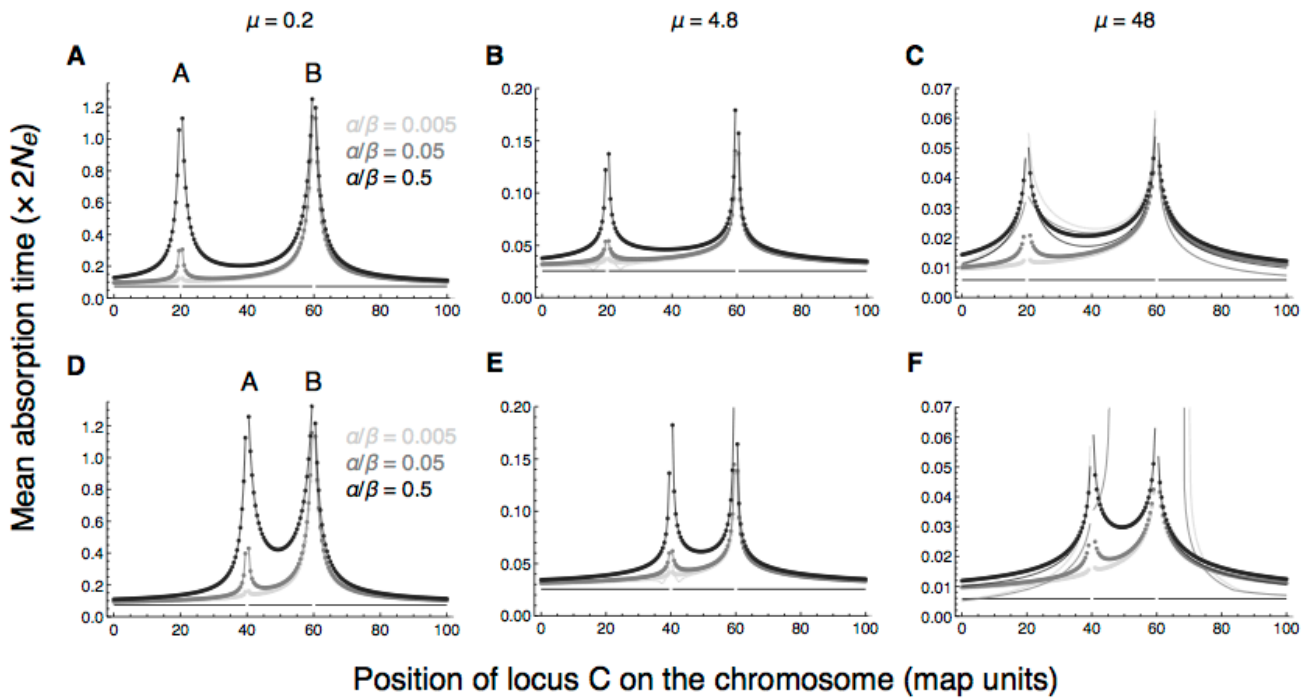

**Figure S19** Effect of linkage to two selected sites on the absorption time of a neutral mutation. The mutation occurs at the neutral locus C. The loci A and B under selection are located 20 and 60 map units from the left end of the chromosome in panels (A)–(C), whereas locus A is located 40 map units from the left end of the chromosome in panels (D)–(F). One map unit (centimorgan) corresponds to a recombination rate of  $r = 0.01$  and the effective population size is  $N_e = 100$ . The scaled selection coefficient in favour of  $B_1$  is  $\beta = 80$  and the scaled migration rate increases from left to right from  $\mu = 0.2$  in (A) and (D) to  $\mu = 4.8$  in (B) and (E) and  $\mu = 48$  in (C) and (F). From light to dark,  $\alpha/\beta$  takes values of 0.005, 0.05, and 0.5, where  $\alpha$  is the scaled selection coefficient in favour of  $A_1$ . Points show values computed using the approximate effective migration rates in Eq. (23) and curves are based on numerically computed exact effective migration rates (Procedure S9). For  $\mu$  large and  $\alpha$  small (light grey curves in F), the latter were affected by numerical errors causing strong deviation. The horizontal black line denotes the baseline for free recombination between locus C and the selected sites.
