# Supplementary material
Source: PubMed Central journal article supplement (PMC4012489)
Supplement: supp_114.163477_FigureS21.pdf [file supp_114.163477_FigureS21.pdf]

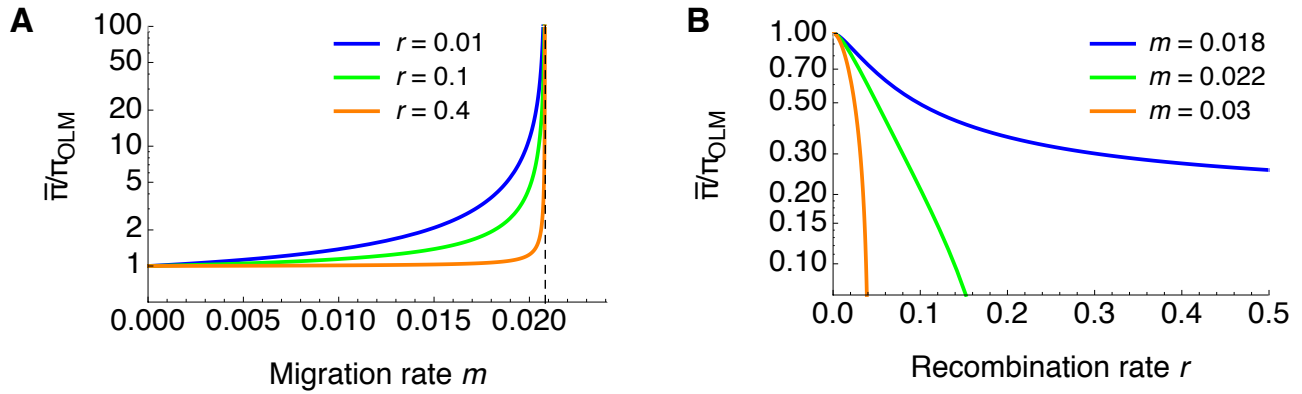

**Figure S21** Mean invasion probability of  $A_1$  with linkage to a background polymorphism compared to no linkage. Curves show the ratio of the weighted mean invasion probability,  $\bar{\pi}$ , divided by that of the one-locus model,  $\pi_{\text{OLM}}$  ( $r = 0.5$ ). The ratio was computed from numerical solutions to the branching process (Eq. 3) and is shown as a function of the migration ( $m$ ) and recombination ( $r$ ) rate in panels (A) and (B), respectively. The vertical dashed line in panel (A) shows the critical migration rate  $a/(1 - b)$ , beyond which allele  $A_1$  cannot be established under the deterministic one-locus model. In panel (B), for  $m = 0.018$  (blue curve), allele  $A_1$  can be established independently of  $r$ . For stronger migration (green and orange curves),  $A_1$  can be established only if  $r$  is below a critical value (where the green and orange curves cross the x-axis, respectively). Other parameter values are  $a = 0.02$ ,  $b = 0.04$ , and  $q_c = 0$ . Compare to Figure 7 for the relative effect of  $m$  on mean extinction time.
