# Supplementary material
Source: PubMed Central journal article supplement (PMC4012489)
Supplement: supp_114.163477_FileS4.pdf [file supp_114.163477_FileS4.pdf]

# Comparison of the Jacobian of the marginal one-locus migration-selection equilibrium ( $E_B$ ) to the mean matrix of the corresponding branching process

---

## Generic model

### ■ General assumptions and rules

```

ln[1]= assumeGeneric := {0 ≤ x[1] ≤ 1, 0 ≤ x[2] ≤ 1, 0 ≤ x[3] ≤ 1,
    x[4] == 1 - x[1] - x[2] - x[3], 0 ≤ m ≤ 1, 0 ≤ r ≤ 1 / 2, 0 ≤ qC ≤ 1, 0 < qB < 1}

ln[2]= assumeNoPositionEffect :=
    {w21 → w21, w31 → w13, w32 → w14, w31 → w13, w43 → w34, w42 → w24, w41 → w14, w23 → w14}

ln[3]= wMat := {{w11, w12, w13, w14},
    {w21, w22, w23, w24}, {w31, w32, w33, w34}, {w41, w42, w43, w44}}

ln[4]= simplifyNotation := {x[1] → x1, x[2] → x2, x[3] → x3, x[4] → x4}

ln[5]= w[i_, j_] := wMat[[i, j]]

```

### ■ Jacobian J for the deterministic two-locus dynamics

Marginal and mean fitnesses.

```

ln[6]= w[i_] := Sum[w[i, j] x[j], {j, 1, 4}]
wBar := Sum[w[i] x[i], {i, 1, 4}]

```

Linkage disequilibrium.

```

ln[8]= DD := x[1] x[4] - x[2] x[3]

```

Generic recursion equations for the haplotype frequencies, where  $q_c$  is the frequency of allele  $B_1$  on the continent and  $m$  is the migration rate.

```

ln[9]= x1RecGenr := (1 - m) (x[1] w[1] - r w[1, 4] DD) / wBar
x2RecGenr := (1 - m) (x[2] w[2] + r w[1, 4] DD) / wBar
x3RecGenr := (1 - m) (x[3] w[3] + r w[1, 4] DD) / wBar + m qC
x4RecGenr := (1 - m) (x[4] w[4] + r w[1, 4] DD) / wBar + m (1 - qC)

```

```

ln[13]= recHap := {x1RecGenr, x2RecGenr, x3RecGenr, x4RecGenr}

```

```

recHap /. simplifyNotation // MatrixForm

```

$$\begin{pmatrix}
 \frac{(1-m) (x_1 (w_{11} x_1 + w_{12} x_2 + w_{13} x_3 + w_{14} x_4) - r w_{14} (-x_2 x_3 + x_1 x_4))}{x_1 (w_{11} x_1 + w_{12} x_2 + w_{13} x_3 + w_{14} x_4) + x_2 (w_{21} x_1 + w_{22} x_2 + w_{23} x_3 + w_{24} x_4) + x_3 (w_{31} x_1 + w_{32} x_2 + w_{33} x_3 + w_{34} x_4) + x_4 (w_{41} x_1 + w_{42} x_2 + w_{43} x_3 + w_{44} x_4)} \\
 \frac{(1-m) (x_2 (w_{21} x_1 + w_{22} x_2 + w_{23} x_3 + w_{24} x_4) + r w_{14} (-x_2 x_3 + x_1 x_4))}{x_1 (w_{11} x_1 + w_{12} x_2 + w_{13} x_3 + w_{14} x_4) + x_2 (w_{21} x_1 + w_{22} x_2 + w_{23} x_3 + w_{24} x_4) + x_3 (w_{31} x_1 + w_{32} x_2 + w_{33} x_3 + w_{34} x_4) + x_4 (w_{41} x_1 + w_{42} x_2 + w_{43} x_3 + w_{44} x_4)} \\
 m qC + \frac{(1-m) (x_3 (w_{31} x_1 + w_{32} x_2 + w_{33} x_3 + w_{34} x_4) + r w_{14} (-x_2 x_3 + x_1 x_4))}{x_1 (w_{11} x_1 + w_{12} x_2 + w_{13} x_3 + w_{14} x_4) + x_2 (w_{21} x_1 + w_{22} x_2 + w_{23} x_3 + w_{24} x_4) + x_3 (w_{31} x_1 + w_{32} x_2 + w_{33} x_3 + w_{34} x_4) + x_4 (w_{41} x_1 + w_{42} x_2 + w_{43} x_3 + w_{44} x_4)} \\
 m (1 - qC) + \frac{(1-m) (x_4 (w_{41} x_1 + w_{42} x_2 + w_{43} x_3 + w_{44} x_4) + r w_{14} (-x_2 x_3 + x_1 x_4))}{x_1 (w_{11} x_1 + w_{12} x_2 + w_{13} x_3 + w_{14} x_4) + x_2 (w_{21} x_1 + w_{22} x_2 + w_{23} x_3 + w_{24} x_4) + x_3 (w_{31} x_1 + w_{32} x_2 + w_{33} x_3 + w_{34} x_4) + x_4 (w_{41} x_1 + w_{42} x_2 + w_{43} x_3 + w_{44} x_4)}
 \end{pmatrix}$$

Generic Jacobian matrix.

```
In[14]:= JHapGenr := Table[Table[Simplify[D[recHap[[j]], i], Assumptions → assumeGeneric],
  {i, {x[1], x[2], x[3], x[4]}}, {j, {1, 2, 3, 4}}]
JHapGenr /. simplifyNotation // MatrixForm
```

$$\begin{pmatrix} (1-m) \left( (2 w_{11} x_1 + w_{12} x_2 + w_{13} x_3 + (w_{14} - r w_{14}) x_4) (x_1 (w_{11} x_1 + w_{12} x_2 + w_{13} x_3 + w_{14} x_4) + x_2 (w_{21} x_1 + w_{22} x_2 + w_{23} x_3 + w_{24} x_4) + x_3 (w_{31} x_1 + w_{32} x_2 + w_{33} x_3 + w_{34} x_4) + x_4 (w_{41} x_1 + w_{42} x_2 + w_{43} x_3 + w_{44} x_4)) \right. \\ \left. (1-m) \left( (w_{21} x_2 + r w_{14} x_4) (x_1 (w_{11} x_1 + w_{12} x_2 + w_{13} x_3 + w_{14} x_4) + x_2 (w_{21} x_1 + w_{22} x_2 + w_{23} x_3 + w_{24} x_4) + x_3 (w_{31} x_1 + w_{32} x_2 + w_{33} x_3 + w_{34} x_4) + x_4 (w_{41} x_1 + w_{42} x_2 + w_{43} x_3 + w_{44} x_4)) \right) \right. \\ \left. (1-m) \left( (w_{31} x_3 + r w_{14} x_4) (x_1 (w_{11} x_1 + w_{12} x_2 + w_{13} x_3 + w_{14} x_4) + x_2 (w_{21} x_1 + w_{22} x_2 + w_{23} x_3 + w_{24} x_4) + x_3 (w_{31} x_1 + w_{32} x_2 + w_{33} x_3 + w_{34} x_4) + x_4 (w_{41} x_1 + w_{42} x_2 + w_{43} x_3 + w_{44} x_4)) \right) \right. \\ \left. (1-m) \left( (r w_{14} + w_{41}) x_4 (x_1 (w_{11} x_1 + w_{12} x_2 + w_{13} x_3 + w_{14} x_4) + x_2 (w_{21} x_1 + w_{22} x_2 + w_{23} x_3 + w_{24} x_4) + x_3 (w_{31} x_1 + w_{32} x_2 + w_{33} x_3 + w_{34} x_4) + x_4 (w_{41} x_1 + w_{42} x_2 + w_{43} x_3 + w_{44} x_4)) \right) \right) \end{pmatrix}$$

The marginal one-locus migration-selection equilibrium is called  $E_B$  and defined as  $E_B = (p, q, D) = (0, \hat{q}_B, 0)$ , where  $p$  and  $q$  are the frequencies of  $A_1$  and  $B_1$  on the island, respectively, and  $D$  is the linkage disequilibrium. Moreover,  $\hat{q}_B$  denotes the equilibrium frequency of  $B_1$ . It is defined as the non-trivial solution of the equation obtained by equating the marginal one-locus recursion equation to  $q$ . With generic fitnesses, this solution cannot be readily found.

Note that at  $E_B$ , the following holds:  $\hat{x}_1 = \hat{x}_2 = 0$ ,  $\hat{x}_3 = \hat{q}_B$  and  $x_4 = 1 - \hat{q}_B$ .

The Jacobian matrix evaluated at the marginal one-locus migration-selection equilibrium  $E_B$ .

```
In[15]:= ruleEB := {x[1] → 0, x[2] → 0, x[3] → qB, x[4] → 1 - qB}
```

Evaluating the Jacobian at the marginal equilibrium  $E_B$ :

```
In[16]:= JHapGenrEB = Simplify[JHapGenr /. ruleEB, Assumptions → assumeGeneric];
JHapGenrEB // MatrixForm
```

$$\begin{pmatrix} \frac{(-1+m) (w_{14} - r w_{14} + q_B (w_{13} + (-1+r) w_{14}))}{q_B (w_{34} + w_{43} - 2 w_{44}) + w_{44} + q_B^2 (w_{33} - w_{34} - w_{43} + w_{44})} & \frac{(-1+m) (-1+q_B) r w_{14}}{q_B (w_{34} + w_{43} - 2 w_{44}) + w_{44} + q_B^2 (w_{33} - w_{34} - w_{43} + w_{44})} \\ (1-m) \left( -q_B (q_B (w_{33} - w_{34}) + w_{34}) (w_{14} + q_B (w_{13} - w_{14} + w_{31} - w_{41}) + w_{41}) + (r (w_{14} - q_B w_{14}) + q_B w_{31}) (q_B (w_{34} + w_{43} - 2 w_{44}) + w_{44} + q_B^2 (w_{33} - w_{34} - w_{43} + w_{44})) \right) & \frac{(q_B (w_{34} + w_{43} - 2 w_{44}) + w_{44} + q_B^2 (w_{33} - w_{34} - w_{43} + w_{44}))^2}{(q_B (w_{34} + w_{43} - 2 w_{44}) + w_{44} + q_B^2 (w_{33} - w_{34} - w_{43} + w_{44}))^2} \\ (1-m) (1-q_B) \left( -(w_{14} + q_B (w_{13} - w_{14} + w_{31} - w_{41}) + w_{41}) (q_B (w_{43} - w_{44}) + w_{44}) + (r w_{14} + w_{41}) (q_B (w_{34} + w_{43} - 2 w_{44}) + w_{44} + q_B^2 (w_{33} - w_{34} - w_{43} + w_{44})) \right) & \frac{(q_B (w_{34} + w_{43} - 2 w_{44}) + w_{44} + q_B^2 (w_{33} - w_{34} - w_{43} + w_{44}))^2}{(q_B (w_{34} + w_{43} - 2 w_{44}) + w_{44} + q_B^2 (w_{33} - w_{34} - w_{43} + w_{44}))^2} \end{pmatrix}$$

As expected (see the case of additive fitnesses above), this is a lower triangular block matrix,  $J = \begin{pmatrix} J_1 & 0 \\ J_3 & J_4 \end{pmatrix}$ , where

```
In[17]:= J1 := JHapGenrEB[[1 ;; 2, 1 ;; 2]]
J4 := JHapGenrEB[[3 ;; 4, 3 ;; 4]]
J1 // FullSimplify // MatrixForm
```

$$\begin{pmatrix} -\frac{(-1+m) (q_B w_{13} + (-1+q_B) (-1+r) w_{14})}{w_{44} + q_B (w_{34} + w_{43} - 2 w_{44} + q_B (w_{33} - w_{34} - w_{43} + w_{44}))} & -\frac{(-1+m) q_B r w_{14}}{w_{44} + q_B (w_{34} + w_{43} - 2 w_{44} + q_B (w_{33} - w_{34} - w_{43} + w_{44}))} \\ \frac{(-1+m) (-1+q_B) r w_{14}}{w_{44} + q_B (w_{34} + w_{43} - 2 w_{44} + q_B (w_{33} - w_{34} - w_{43} + w_{44}))} & \frac{(-1+m) (-w_{24} + q_B (r w_{14} - w_{23} + w_{24}))}{w_{44} + q_B (w_{34} + w_{43} - 2 w_{44} + q_B (w_{33} - w_{34} - w_{43} + w_{44}))} \end{pmatrix}$$

```
J4 // MatrixForm
```

$$\begin{pmatrix} \frac{(-1+m) (-1+q_B) (2 q_B (w_{33} - w_{34}) w_{44} + w_{34} w_{44} + q_B^2 (w_{33} (w_{43} - 2 w_{44}) + w_{34} w_{44}))}{(q_B (w_{34} + w_{43} - 2 w_{44}) + w_{44} + q_B^2 (w_{33} - w_{34} - w_{43} + w_{44}))^2} & \frac{(-1+m) q_B (2 q_B (w_{33} - w_{34}) w_{44} + w_{34} w_{44} + q_B^2 (w_{33} (w_{43} - 2 w_{44}) + w_{34} w_{44}))}{(q_B (w_{34} + w_{43} - 2 w_{44}) + w_{44} + q_B^2 (w_{33} - w_{34} - w_{43} + w_{44}))^2} \\ -\frac{(-1+m) (-1+q_B) (2 q_B (w_{33} - w_{34}) w_{44} + w_{34} w_{44} + q_B^2 (w_{33} (w_{43} - 2 w_{44}) + w_{34} w_{44}))}{(q_B (w_{34} + w_{43} - 2 w_{44}) + w_{44} + q_B^2 (w_{33} - w_{34} - w_{43} + w_{44}))^2} & -\frac{(-1+m) q_B (2 q_B (w_{33} - w_{34}) w_{44} + w_{34} w_{44} + q_B^2 (w_{33} (w_{43} - 2 w_{44}) + w_{34} w_{44}))}{(q_B (w_{34} + w_{43} - 2 w_{44}) + w_{44} + q_B^2 (w_{33} - w_{34} - w_{43} + w_{44}))^2} \end{pmatrix}$$

## ■ Mean matrix L for the two-type branching process

Marginal fitnesses of types 1 and 2.

```
In[19]:= wBP1 := w[1, 3] qB + w[1, 4] (1 - qB)
wBP2 := w[2, 4] (1 - qB) + w[1, 4] qB
```

Mean fitness of resident population.

```
In[21]:= wBPBar := qB^2 w[3, 3] + 2 qB (1 - qB) w[3, 4] + (1 - qB)^2 w[4, 4]
```

The mean matrix.

```
In[22]:= A := (1 - m) (wBP1 - r (1 - qB) w[1, 4]) / wBPBar
B := (1 - m) r qB w[1, 4] / wBPBar
C := (1 - m) r (1 - qB) w[1, 4] / wBPBar
D := (1 - m) (wBP2 - r qB w[1, 4]) / wBPBar
```

```
In[26]:= L := {{A, C}, {B, D}}
```

```
L // FullSimplify // MatrixForm
```

$$\begin{pmatrix} -\frac{(-1+m)(qB w13+(-1+qB)(-1+r)w14)}{2qB(w34-w44)+w44+qB^2(w33-2w34+w44)} & \frac{(-1+m)(-1+qB)r w14}{2qB(w34-w44)+w44+qB^2(w33-2w34+w44)} \\ -\frac{(-1+m)qB r w14}{2qB(w34-w44)+w44+qB^2(w33-2w34+w44)} & \frac{(-1+m)(qB(-1+r)w14+(-1+qB)w24)}{2qB(w34-w44)+w44+qB^2(w33-2w34+w44)} \end{pmatrix}$$

## ■ Comparison of $L^T$ and $J_1$

```
assumeNoPositionEffect
```

```
{w21 → w21, w31 → w13, w32 → w14, w31 → w13, w43 → w34, w42 → w24, w41 → w14, w23 → w14}
```

```
Transpose[L] // FullSimplify // MatrixForm
```

$$\begin{pmatrix} -\frac{(-1+m)(qB w13+(-1+qB)(-1+r)w14)}{2qB(w34-w44)+w44+qB^2(w33-2w34+w44)} & -\frac{(-1+m)qB r w14}{2qB(w34-w44)+w44+qB^2(w33-2w34+w44)} \\ \frac{(-1+m)(-1+qB)r w14}{2qB(w34-w44)+w44+qB^2(w33-2w34+w44)} & \frac{(-1+m)(qB(-1+r)w14+(-1+qB)w24)}{2qB(w34-w44)+w44+qB^2(w33-2w34+w44)} \end{pmatrix}$$

```
J1 /. assumeNoPositionEffect // FullSimplify // MatrixForm
```

$$\begin{pmatrix} -\frac{(-1+m)(qB w13+(-1+qB)(-1+r)w14)}{2qB(w34-w44)+w44+qB^2(w33-2w34+w44)} & -\frac{(-1+m)qB r w14}{2qB(w34-w44)+w44+qB^2(w33-2w34+w44)} \\ \frac{(-1+m)(-1+qB)r w14}{2qB(w34-w44)+w44+qB^2(w33-2w34+w44)} & \frac{(-1+m)(qB(-1+r)w14+(-1+qB)w24)}{2qB(w34-w44)+w44+qB^2(w33-2w34+w44)} \end{pmatrix}$$

```
Transpose[L] - J1 /. assumeNoPositionEffect // Simplify
```

```
{{0, 0}, {0, 0}}
```

We note that  $J_1$  is equal to the transpose of the mean matrix  $L$ , as long as position and parental effects on relative fitnesses can be ignored. This also holds irrespectively of whether the continent is monomorphic or polymorphic.

## ■ Eigenvalues of $J$ and $L^T$

```
FullSimplify[Eigenvalues[J1] /. assumeNoPositionEffect,
Assumptions → Flatten[{assumeGeneric}]]
```

$$\left\{ -\left( (-1+m)(w14-r w14+qB(w13-w24)+w24) \left( 2qB(w34-w44)+w44+qB^2(w33-2w34+w44) \right) + \sqrt{\left( (-1+m)^2 \left( ((-1+r)w14+w24)^2 + qB^2(w13-2w14+w24)(w13-2w14+4r w14+w24) - 2qB(w14((-1+r)w13+2w14-4r w14)+(w13+3(-1+r)w14)w24+w24^2) \right) + \left( 2qB(w34-w44)+w44+qB^2(w33-2w34+w44) \right)^2} \right) \right\} / \left( 2 \left( 2qB(w34-w44)+w44+qB^2(w33-2w34+w44) \right)^2 \right), \\ \left( -(-1+m)(w14-r w14+qB(w13-w24)+w24) \left( 2qB(w34-w44)+w44+qB^2(w33-2w34+w44) \right) + \sqrt{\left( (-1+m)^2 \left( ((-1+r)w14+w24)^2 + qB^2(w13-2w14+w24)(w13-2w14+4r w14+w24) - 2qB(w14((-1+r)w13+2w14-4r w14)+(w13+3(-1+r)w14)w24+w24^2) \right) + \left( 2qB(w34-w44)+w44+qB^2(w33-2w34+w44) \right)^2} \right) \right\} / \left( 2 \left( 2qB(w34-w44)+w44+qB^2(w33-2w34+w44) \right)^2 \right) \right\}$$

```
In[27]:= evalsJ1 := { -\left( (-1+m)(w14-r w14+qB(w13-w24)+w24) \left( 2qB(w34-w44)+w44+qB^2(w33-2w34+w44) \right) + \sqrt{\left( (-1+m)^2 \left( ((-1+r)w14+w24)^2 + qB^2(w13-2w14+w24)(w13-2w14+4r w14+w24) - 2qB(w14((-1+r)w13+2w14-4r w14)+(w13+3(-1+r)w14)w24+w24^2) \right) + \left( 2qB(w34-w44)+w44+qB^2(w33-2w34+w44) \right)^2} \right) \right\} / \left( 2 \left( 2qB(w34-w44)+w44+qB^2(w33-2w34+w44) \right)^2 \right),
```

```
In[28]:= evalsJ4 := FullSimplify[Eigenvalues[J4] /. assumeNoPositionEffect,
Assumptions → Flatten[{assumeGeneric}]]
```

```
evalsJ4
```

$$\left\{ 0, \frac{(-1+m)(-qB^2 w33 w34 + (-1+qB)(2qB w33 + w34 - qB w34) w44)}{\left( 2qB(w34-w44)+w44+qB^2(w33-2w34+w44) \right)^2} \right\}$$

```
In[29]:= evalsL := FullSimplify[Eigenvalues[L] /. assumeNoPositionEffect,
  Assumptions → Flatten[{assumeGeneric}]]
```

Check that the eigenvalues of  $J_1$  are the same as those of  $L$ :

```
evalsJ1 - evalsL // FullSimplify
```

```
{0, 0}
```

## ■ Conclusion

We again use  $e_1$  and  $e_2$  for the eigenvalues of  $J_1$  and  $e_3$  and  $e_4$  for the eigenvalues of  $J_4$ .

Conditional on existence of  $E_B$  as a valid marginal one-locus equilibrium, we would like to know if the condition for invasion of  $A_1$  can be determined exclusively based on the eigenvalues of  $J_1$ . If this is the case, we know that what we have shown above for the case of additive fitnesses and a monomorphic continent holds more generally: If invasion of  $A_1$  via  $E_B$  is possible in the two-type branching process, then it is also possible in the deterministic two-locus dynamics, and vice versa.

To illustrate the dynamics, consider the 3-simplex  $\Delta^3$ , which has four vertices, each of which corresponds to the fixation of one out of the four gametes  $A_1 B_1$ ,  $A_1 B_2$ ,  $A_2 B_1$  and  $A_2 B_2$ . Moreover, there are six edges, each of which corresponds to the case where a particular pair of alleles segregates in the population; there are four faces, each of which corresponds to the case where all but one particular allele segregate in the population. The interior of  $\Delta^3$  corresponds to all four alleles segregating. Clearly, the marginal one-locus equilibrium  $E_B$  sits on the edge that connects the two vertices that correspond to fixation of  $A_2 B_1$  and  $A_2 B_2$ , respectively.  $E_B$  is a valid one-locus polymorphism only if it does not sit on one of these vertices, but on the edge in between.

Matrix  $J_4$  is given by  $\begin{pmatrix} \frac{\partial f_3}{\partial x_3} & \frac{\partial f_3}{\partial x_4} \\ \frac{\partial f_4}{\partial x_3} & \frac{\partial f_4}{\partial x_4} \end{pmatrix}$ , where  $f_i = f_i(x_1, x_2, x_3, x_4)$  is the recursion equation of gamete frequency  $i$  and

for all  $i \in \{1, 2, 3, 4\}$ . Therefore, we see that  $J_4$  characterises the dynamics along the edge of  $\Delta^3$  that connects the vertices  $x_4 = 1$  and  $x_3 = 1$ . From this, it follows that the eigenvalues of  $J_4$  determine the so-called internal stability

of  $E_B$ , that is stability along the edge of  $\Delta^3$  on which  $E_B$  sits. Matrix  $J_1$ , on the other hand, is given by  $\begin{pmatrix} \frac{\partial f_1}{\partial x_1} & \frac{\partial f_1}{\partial x_2} \\ \frac{\partial f_2}{\partial x_1} & \frac{\partial f_2}{\partial x_2} \end{pmatrix}$

and therefore characterises the dynamics transversal to the boundary of  $\Delta^3$  that connects the vertices  $x_4 = 1$  and  $x_3 = 1$ , i.e. the dynamics leading into or out of the interior of the simplex. From this, it follows that the eigenvalues of  $J_1$  determine the so-called external stability of  $E_B$ . Obviously, the external stability is directly linked to the question of whether or not  $E_B$  can be invaded by a mutation at locus  $A$ .

As shown above, with generic fitnesses and an arbitrary frequency  $q_c$  of  $B_1$  on the continent, one out of the two eigenvalues of  $J_4$  is always 0. We arbitrarily assign 0 to eigenvalue  $e_3$ . Then, the value of  $e_4$  determines i) existence of  $E_B$  in the one- and two-locus dynamics, and ii) about asymptotic stability of  $E_B$  in the one-locus dynamics. Both are required for the initial condition of our biological scenario, and fulfilled if and only if  $e_4 < 1$ . From this, however, it automatically follows that whenever  $E_B$  becomes unstable in the two-locus dynamics (upon occurrence of  $A_1$ ), this can only be due to either  $e_1$  or  $e_2$  being larger than 1. Because  $e_1$  and  $e_2$  are shared between  $J_1$  and  $L$ , this argument proves what we wanted to show: If invasion of  $A_1$  via  $E_B$  is possible in the two-type branching process, then it is also possible in the deterministic two-locus dynamics, and vice versa.
