# Supplementary material
Source: PubMed Central journal article supplement (PMC4012489)
Supplement: supp_114.163477_FileS6.pdf [file supp_114.163477_FileS6.pdf]

# Derivative of the weighted mean invasion probability ( $\bar{\pi}$ ) at recombination rate $r = 0$ : generic expressions

## Paths

---

In[142]:= `figPath := "/Users/Simon/Documents/LocAdD/results/130606/nonZeroOptRecRate/figures/"`

## Rules and assumptions

---

In[143]:= `R1Rule := R1 -> Sqrt[-4 b (-1 + a + b) m (1 + m) qC + (b + (-1 + a) m + 2 b m qC)^2]`

In[144]:= `qEqPCRule := {qEq -> (b - m + a m + 2 b m qC + R1) / (2 (+b + b m))}`

Check:

`FullSimplify[qEq /. qEqPCRule /. R1Rule /. qC -> 0,`  
`Assumptions -> Flatten[{assumeGeneral, m < (b / (1 - a))}]]]`

$$\frac{b - m + a m}{b + b m}$$

`qEq /. qEqPCRule`

$$\frac{b - m + a m}{b (1 + m)}$$

This is as expected.

## Generic fitnesses

## Recapitulation: Deterministic dynamics of the marginal one-locus system

---

- Migration-selection equilibrium
- Coordinates

We obtain the coordinates of the polymorphic one-locus migration-selection equilibrium as the solution of the recursion equation such that  $0 < \hat{q}_B < 1$ .

In[145]:= `eqqB := qB == (1 - m) (wTilde / wBarTilde) qB + m qC`

```
In[146]:= w1TildeRule := w1Tilde -> w33 qB + w34 (1 - qB)
w2TildeRule := w2Tilde -> w34 qB + w44 (1 - qB)
wBarTildeRule := wBarTilde -> qB^2 w33 + 2 qB (1 - qB) w34 + (1 - qB)^2 w44
```

Test:

```
qB w1Tilde + (1 - qB) w2Tilde - wBarTilde /.
{w1TildeRule, w2TildeRule, wBarTildeRule} // Simplify
0
```

For a polymorphic continent, we obtain

```
In[149]:= qEqBRulePolymCont = FullSimplify[Solve[eqqB /. w1TildeRule, qB]] [[1]]
```

```
Out[149]= {qB ->  $\frac{1}{2(-1+m)(w33-w34)} (w34 - m w34 - wBarTilde + \sqrt{4(-1+m)m qC (w33-w34) wBarTilde + ((-1+m) w34 + wBarTilde)^2})$ }
```

An non-trivial explicit solution for  $\hat{q}_B$  cannot be found by Mathematica:

```
FullSimplify[Solve[eqqB /. w1TildeRule /. wBarTildeRule, qB], Assumptions -> {0 < w33, 0 < w34, 0 < w44, 0 < qB < 1, 0 < qC < 1, 0 < m < 1}]
```

\$Aborted

For a monomorphic continent, we find

```
In[150]:= qEqBRuleRaw = FullSimplify[Solve[(eqqB /. w1TildeRule /. {qC -> 0}), qB]]
```

```
Out[150]= {{qB -> 0}, {qB ->  $\frac{w34 - m w34 - wBarTilde}{(-1+m)(w33-w34)}$ }}
```

```
In[151]:= qEqBRule := qEqBRuleRaw[[2]]
```

## ■ Stability

We find the condition for stability of  $\hat{q}_B$  by asking when the derivative of the right-hand side of the difference equation is  $> 0$ .

```
In[152]:= DeqqB := D[(1 - m)  $\frac{w1Tilde}{wBarTilde}$  qB + m qC - qB /. w1TildeRule, qB]
```

DeqqB

```
Out[153]= -1 +  $\frac{(1 - m) qB (w33 - w34)}{wBarTilde}$  +  $\frac{(1 - m) (qB w33 + (1 - qB) w34)}{wBarTilde}$ 
```

DeqqB /. qEqBRule

```
-1 +  $\frac{(1 - m) \left( w34 \left( 1 - \frac{w34 - m w34 - wBarTilde}{(-1+m)(w33-w34)} \right) + \frac{w33 (w34 - m w34 - wBarTilde)}{(-1+m)(w33-w34)} \right)}{wBarTilde}$  +  $\frac{(1 - m) (w34 - m w34 - wBarTilde)}{(-1 + m) wBarTilde}$ 
```

```
mCritRule = Solve[DeqqB == 0 /. qEqBRule, m] [[1]]
```

```
{m ->  $\frac{w34 - wBarTilde}{w34}$ }
```

```
Simplify[Reduce[DeqqB < 0 /. qEqBRule, m], Assumptions -> {0 < w34, 0 < wBarTilde, 0 < w33}]
```

```
m w34 + wBarTilde < w34
```

We note that  $\tilde{w}$  is a function of  $q_B$  and therefore, the generic expressions obtained above for the equilibrium frequency and the critical migration rate are not very informative; they provide implicit solutions only. To obtain informative explicit solutions, we make specific assumptions about the relative fitnesses. For details, see Mathematica Notebook '2LocContIsland\_Determ\_Discr.nb'. Here, however, we want to proceed with generic implicit expressions, as our goal is to obtain a generic condition for when the recombination rate at which the invasion probability of the focal mutation  $A_1$  at a second locus has a maximum is strictly positive.

## A generic (implicit) condition for $r_{\text{opt}} > 0$

### ■ Probability-generating functions

We start from the most general versions of the probability-generating functions (pgf) for the two-type branching process under the assumption of type-specific, but independent Poisson-distributed offspring numbers for each parental type. These are

$$f_i(s_1, s_2) = e^{-\lambda_{i1}(1-s_1)} e^{-\lambda_{i2}(1-s_2)} \text{ for } i \in \{1, 2\}, \quad (1)$$

with

$$\lambda_{11} = (1 - m)[w_1 - r(1 - \hat{q}_B) w_{14}] / \bar{w} \quad (2)$$

$$\lambda_{12} = (1 - m)r(1 - \hat{q}_B) w_{14} / \bar{w} \quad (3)$$

$$\lambda_{21} = (1 - m)r \hat{q}_B w_{14} / \bar{w} \quad (4)$$

$$\lambda_{22} = (1 - m)[w_2 - r \hat{q}_B w_{14}] / \bar{w} \quad (5)$$

(see sections 2 and 4 of Text S1 of the manuscript).

We denote the extinction probabilities of allele  $A_1$  conditional on occurrence on background  $B_1$  ( $B_2$ ) by  $Q_1$  ( $Q_2$ ). These are obtained as the smallest solution between 0 and 1 to

$$s_i = f_i(s_1, s_2) \text{ for } i \in \{1, 2\}. \quad (6)$$

The respective invasion probabilities of  $A_1$  are  $\pi_1$  and  $\pi_2$  and the average invasion probability is obtained as the weighted mean

$$\bar{\pi} = \hat{q}_B \pi_1 + (1 - \hat{q}_B) \pi_2. \quad (7)$$

As Eqs. (6) are transcendental, explicit solutions are not available in general.

```
In[154]:=  $\lambda_{11}\text{Rule} := \lambda_{11} \rightarrow (1 - m) (w_1 - r (1 - \text{qEqB}) w_{14}) / \text{wBar}$ 
 $\lambda_{12}\text{Rule} := \lambda_{12} \rightarrow (1 - m) r (1 - \text{qEqB}) w_{14} / \text{wBar}$ 
 $\lambda_{21}\text{Rule} := \lambda_{21} \rightarrow (1 - m) r \text{qEqB} w_{14} / \text{wBar}$ 
 $\lambda_{22}\text{Rule} := \lambda_{22} \rightarrow (1 - m) (w_2 - r \text{qEqB} w_{14}) / \text{wBar}$ 
 $\lambda\text{Rules} := \{\lambda_{11}\text{Rule}, \lambda_{12}\text{Rule}, \lambda_{21}\text{Rule}, \lambda_{22}\text{Rule}\}$ 
```

```
In[159]:=  $w_1\text{Rule} := w_1 \rightarrow w_{13} \text{qEqB} + w_{14} (1 - \text{qEqB})$ 
 $w_2\text{Rule} := w_2 \rightarrow w_{24} (1 - \text{qEqB}) + w_{14} \text{qEqB}$ 
 $w\text{BarRule} := w\text{Bar} \rightarrow \text{qEqB}^2 w_{33} + 2 \text{qEqB} (1 - \text{qEqB}) w_{34} + (1 - \text{qEqB})^2 w_{44}$ 
```

### ■ Implicit differentiation at $r = 0$

#### ■ Goal

We want to find the derivative of the average invasion probability as a function of the recombination rate, evaluated at  $r = 0$ :

$$\bar{\pi}'(0) = \frac{d}{dr} [\hat{q}_B \pi_1(r) + (1 - \hat{q}_B) \pi_2(r)] \Big|_{r=0} = \hat{q}_B \frac{d\pi_1(r)}{dr} \Big|_{r=0} + (1 - \hat{q}_B) \frac{d\pi_2(r)}{dr} \Big|_{r=0}. \quad (8)$$

The optimal recombination rate is non-zero if  $\bar{\pi}'(0)$  is positive. We obtain  $\bar{\pi}'(0)$  via implicit differentiation. Let  $Q_1^\circ$  and  $Q_2^\circ$  be the smallest positive solutions to Eq. (6) with  $r = 0$ , and let  $\pi_1^\circ = 1 - Q_1^\circ$  and  $\pi_2^\circ = 1 - Q_2^\circ$  be the corresponding invasion probabilities in the absence of recombination.

The extinction probabilities  $Q_i$  fulfill Eq. (6). Moreover, because  $Q_i = 1 - \pi_i$ , we have  $\frac{dQ_i(r)}{dr} = -\frac{d\pi_i(r)}{dr}$ .

#### ■ Implementation 1: in terms of the invasion probabilities $\pi_i$

```
In[162]:=  $\text{eq1LHS}[\pi_{1\_}, \pi_{2\_}] := \text{Log}[1 - \pi_1]$ 
 $\text{eq1RHS}[\pi_{1\_}, \pi_{2\_}] := -\lambda_{11} \pi_1 - \lambda_{12} \pi_2$ 
 $\text{eq2LHS}[\pi_{1\_}, \pi_{2\_}] := \text{Log}[1 - \pi_2]$ 
 $\text{eq2RHS}[\pi_{1\_}, \pi_{2\_}] := -\lambda_{21} \pi_1 - \lambda_{22} \pi_2$ 
 $\text{eq1LHS}[\pi_1[r], \pi_2[r]] == \text{eq1RHS}[\pi_1[r], \pi_2[r]] /. \lambda\text{Rules}$ 
 $\text{Log}[1 - \pi_1[r]] == -\frac{(1 - m) (w_1 - (1 - \text{qEqB}) r w_{14}) \pi_1[r]}{\text{wBar}} - \frac{(1 - m) (1 - \text{qEqB}) r w_{14} \pi_2[r]}{\text{wBar}}$ 
 $\text{eq2LHS}[\pi_1[r], \pi_2[r]] == \text{eq2RHS}[\pi_1[r], \pi_2[r]] /. \lambda\text{Rules}$ 
 $\text{Log}[1 - \pi_2[r]] == -\frac{(1 - m) \text{qEqB} r w_{14} \pi_1[r]}{\text{wBar}} - \frac{(1 - m) (-\text{qEqB} r w_{14} + w_2) \pi_2[r]}{\text{wBar}}$ 
```

$$D[\text{eq1LHS}[\pi_1[r], \pi_2[r]] /. \lambda\text{Rules}, r] == D[\text{eq1RHS}[\pi_1[r], \pi_2[r]] /. \lambda\text{Rules}, r]$$

$$\frac{\pi_1'[r]}{1 - \pi_1[r]} == \frac{(1 - m) (1 - \text{qEqB}) w_{14} \pi_1[r]}{w_{\text{Bar}}} - \frac{(1 - m) (1 - \text{qEqB}) w_{14} \pi_2[r]}{w_{\text{Bar}}} - \frac{(1 - m) (w_1 - (1 - \text{qEqB}) r w_{14}) \pi_1'[r]}{w_{\text{Bar}}} - \frac{(1 - m) (1 - \text{qEqB}) r w_{14} \pi_2'[r]}{w_{\text{Bar}}}$$

$$D[\text{eq2LHS}[\pi_1[r], \pi_2[r]] /. \lambda\text{Rules}, r] == D[\text{eq2RHS}[\pi_1[r], \pi_2[r]] /. \lambda\text{Rules}, r]$$

$$\frac{\pi_2'[r]}{1 - \pi_2[r]} == - \frac{(1 - m) \text{qEqB} w_{14} \pi_1[r]}{w_{\text{Bar}}} + \frac{(1 - m) \text{qEqB} w_{14} \pi_2[r]}{w_{\text{Bar}}} - \frac{(1 - m) \text{qEqB} r w_{14} \pi_1'[r]}{w_{\text{Bar}}} - \frac{(1 - m) (-\text{qEqB} r w_{14} + w_2) \pi_2'[r]}{w_{\text{Bar}}}$$

In[166]:= **Deq1 = FullSimplify[**

$$D[\text{eq1LHS}[\pi_1[r], \pi_2[r]] /. \lambda\text{Rules}, r] == D[\text{eq1RHS}[\pi_1[r], \pi_2[r]] /. \lambda\text{Rules}, r]$$

$$\frac{\pi_1'[r]}{-1 + \pi_1[r]} == \frac{1}{w_{\text{Bar}}} (-1 + m) (w_1 \pi_1'[r] + (-1 + \text{qEqB}) w_{14} (\pi_1[r] - \pi_2[r] + r (\pi_1'[r] - \pi_2'[r])))$$

**Deq2 = FullSimplify[**

$$D[\text{eq2LHS}[\pi_1[r], \pi_2[r]] /. \lambda\text{Rules}, r] == D[\text{eq2RHS}[\pi_1[r], \pi_2[r]] /. \lambda\text{Rules}, r]$$

$$\frac{\pi_2'[r]}{-1 + \pi_2[r]} == \frac{1}{w_{\text{Bar}}} (-1 + m) (\text{qEqB} w_{14} (\pi_1[r] - \pi_2[r] + r \pi_1'[r]) + (-\text{qEqB} r w_{14} + w_2) \pi_2'[r])$$

**Deq1 /. {r -> 0}**

$$\frac{\pi_1'[0]}{-1 + \pi_1[0]} == \frac{(-1 + m) ((-1 + \text{qEqB}) w_{14} (\pi_1[0] - \pi_2[0]) + w_1 \pi_1'[0])}{w_{\text{Bar}}}$$

**Deq2 /. {r -> 0}**

$$\frac{\pi_2'[0]}{-1 + \pi_2[0]} == \frac{(-1 + m) (\text{qEqB} w_{14} (\pi_1[0] - \pi_2[0]) + w_2 \pi_2'[0])}{w_{\text{Bar}}}$$

**Deq1R0 = Deq1 /. {r -> 0} /. {\pi\_1[0] -> \pi\_1Circ, \pi\_2[0] -> \pi\_2Circ}**

$$\frac{\pi_1'[0]}{-1 + \pi_1\text{Circ}} == \frac{(-1 + m) ((-1 + \text{qEqB}) w_{14} (\pi_1\text{Circ} - \pi_2\text{Circ}) + w_1 \pi_1'[0])}{w_{\text{Bar}}}$$

**Deq2R0 = Deq2 /. {r -> 0} /. {\pi\_1[0] -> \pi\_1Circ, \pi\_2[0] -> \pi\_2Circ}**

$$\frac{\pi_2'[0]}{-1 + \pi_2\text{Circ}} == \frac{(-1 + m) (\text{qEqB} w_{14} (\pi_1\text{Circ} - \pi_2\text{Circ}) + w_2 \pi_2'[0])}{w_{\text{Bar}}}$$

Now we solve for  $\pi_1'[0]$  and  $\pi_2'[0]$ :

**\pi\_iDR0Rule = Solve[{Deq1R0, Deq2R0}, {\pi\_1'[0], \pi\_2'[0]}**

$$\left\{ \left\{ \pi_1'[0] \rightarrow - \frac{(-1 + m) (-1 + \text{qEqB}) w_{14} (-1 + \pi_1\text{Circ}) (\pi_1\text{Circ} - \pi_2\text{Circ})}{w_1 - m w_1 - w_{\text{Bar}} - w_1 \pi_1\text{Circ} + m w_1 \pi_1\text{Circ}}, \right. \right.$$

$$\left. \left. \pi_2'[0] \rightarrow \frac{(-1 + m) \text{qEqB} w_{14} (-1 + \pi_2\text{Circ}) (-\pi_1\text{Circ} + \pi_2\text{Circ})}{w_2 - m w_2 - w_{\text{Bar}} - w_2 \pi_2\text{Circ} + m w_2 \pi_2\text{Circ}} \right\} \right\}$$

**\piAvR0 := qEqB \pi\_1'[0] + (1 - qEqB) \pi\_2'[0]**

**\piAvR0Term1 = \piAvR0 /. \pi\_iDR0Rule[[1]]**

$$- \frac{(-1 + m) (-1 + \text{qEqB}) \text{qEqB} w_{14} (-1 + \pi_1\text{Circ}) (\pi_1\text{Circ} - \pi_2\text{Circ})}{w_1 - m w_1 - w_{\text{Bar}} - w_1 \pi_1\text{Circ} + m w_1 \pi_1\text{Circ}} + \frac{(-1 + m) (1 - \text{qEqB}) \text{qEqB} w_{14} (-1 + \pi_2\text{Circ}) (-\pi_1\text{Circ} + \pi_2\text{Circ})}{w_2 - m w_2 - w_{\text{Bar}} - w_2 \pi_2\text{Circ} + m w_2 \pi_2\text{Circ}}$$

$$\pi_{AvR0Term2} = \frac{(1-m)(1-qEqB)qEqBw14(1-\pi1Circ)(\pi2Circ-\pi1Circ)}{wBar - (1-m)(1-\pi1Circ)w1} +$$

$$- \frac{(1-m)(1-qEqB)qEqBw14(1-\pi2Circ)(\pi2Circ-\pi1Circ)}{wBar - (1-m)(1-\pi2Circ)w2};$$

$\pi_{AvR0Term1} - \pi_{AvR0Term2} // FullSimplify$

0

$$\pi_{AvR0Term3} = (1-m)qEqB(1-qEqB)w14(\pi2Circ-\pi1Circ)$$

$$\frac{1}{wBar} \left( \frac{1-\pi1Circ}{1-(1-m)(1-\pi1Circ)\frac{w1}{wBar}} - \frac{1-\pi2Circ}{1-(1-m)(1-\pi2Circ)\frac{w2}{wBar}} \right);$$

$\pi_{AvR0Term1} - \pi_{AvR0Term3} // FullSimplify$

0

$eq1LHS[\pi1[r], \pi2[r]] == eq1RHS[\pi1[r], \pi2[r]] /. \lambdaRules /. r \rightarrow 0$

$$\text{Log}[1 - \pi1[0]] == - \frac{(1-m)w1\pi1[0]}{wBar}$$

$eq2LHS[\pi1[r], \pi2[r]] == eq2RHS[\pi1[r], \pi2[r]] /. \lambdaRules /. r \rightarrow 0$

$$\text{Log}[1 - \pi2[0]] == - \frac{(1-m)w2\pi2[0]}{wBar}$$

■ Implementation 2: in terms of the extinction probabilities  $Q_i$

$eq1LHSalt[Q1_, Q2_] := \text{Log}[Q1]$   
 $eq1RHSalt[Q1_, Q2_] := -\lambda11(1-Q1) - \lambda12(1-Q2)$   
 $eq2LHSalt[Q1_, Q2_] := \text{Log}[Q2]$   
 $eq2RHSalt[Q1_, Q2_] := -\lambda21(1-Q1) - \lambda22(1-Q2)$   
 $eq1LHSalt[Q1[r], Q2[r]] == eq1RHSalt[Q1[r], Q2[r]] /. \lambdaRules$

$$\text{Log}[Q1[r]] == - \frac{(1-m)(w1 - (1-qEqB)r w14)(1-Q1[r])}{wBar} - \frac{(1-m)(1-qEqB)r w14(1-Q2[r])}{wBar}$$

$D[eq1LHSalt[Q1[r], Q2[r]] /. \lambdaRules, r] == D[eq1RHSalt[Q1[r], Q2[r]] /. \lambdaRules, r]$

$$Q1'[r] == \frac{(1-m)(1-qEqB)w14(1-Q1[r])}{wBar} - \frac{(1-m)(1-qEqB)w14(1-Q2[r])}{wBar} +$$

$$\frac{(1-m)(w1 - (1-qEqB)r w14)Q1'[r]}{wBar} + \frac{(1-m)(1-qEqB)r w14Q2'[r]}{wBar}$$

$D[eq2LHSalt[Q1[r], Q2[r]] /. \lambdaRules, r] == D[eq2RHSalt[Q1[r], Q2[r]] /. \lambdaRules, r]$

$$Q2'[r] == - \frac{(1-m)qEqBw14(1-Q1[r])}{wBar} + \frac{(1-m)qEqBw14(1-Q2[r])}{wBar} +$$

$$\frac{(1-m)qEqB r w14 Q1'[r]}{wBar} + \frac{(1-m)(-qEqB r w14 + w2) Q2'[r]}{wBar}$$

$Deq1alt = FullSimplify[$

$D[eq1LHSalt[Q1[r], Q2[r]] /. \lambdaRules, r] == D[eq1RHSalt[Q1[r], Q2[r]] /. \lambdaRules, r]$

$$\frac{1}{wBar Q1[r]} (wBar Q1'[r] +$$

$$(-1+m)Q1[r](w1Q1'[r] + (-1+qEqB)w14(Q1[r]-Q2[r] + r(Q1'[r]-Q2'[r]))) == 0$$

$Deq2alt = FullSimplify[$

$D[eq2LHSalt[Q1[r], Q2[r]] /. \lambdaRules, r] == D[eq2RHSalt[Q1[r], Q2[r]] /. \lambdaRules, r]$

$$\frac{Q2'[r]}{Q2[r]} + \frac{1}{wBar} (-1+m)(qEqBw14(Q1[r]-Q2[r] + rQ1'[r]) + (-qEqB r w14 + w2)Q2'[r]) == 0$$

Deq1alt /. {r -> 0}

$$\frac{1}{wBar Q1[0]} (wBar Q1'[0] + (-1 + m) Q1[0] ((-1 + qEqB) w14 (Q1[0] - Q2[0]) + w1 Q1'[0])) == 0$$

Deq2alt /. {r -> 0}

$$\frac{Q2'[0]}{Q2[0]} + \frac{(-1 + m) (qEqB w14 (Q1[0] - Q2[0]) + w2 Q2'[0])}{wBar} == 0$$

Deq1R0alt = Deq1alt /. {r -> 0} /. {Q1[0] -> Q1Circ, Q2[0] -> Q2Circ}

$$\frac{1}{Q1Circ wBar} (wBar Q1'[0] + (-1 + m) Q1Circ ((Q1Circ - Q2Circ) (-1 + qEqB) w14 + w1 Q1'[0])) == 0$$

Deq2R0alt = Deq2alt /. {r -> 0} /. {Q1[0] -> Q1Circ, Q2[0] -> Q2Circ}

$$\frac{Q2'[0]}{Q2Circ} + \frac{(-1 + m) ((Q1Circ - Q2Circ) qEqB w14 + w2 Q2'[0])}{wBar} == 0$$

Now we solve for Q1'[0] and Q2'[0]:

QiDR0Rule = Solve[{Deq1R0alt, Deq2R0alt}, {Q1'[0], Q2'[0]}]

$$\left\{ \left\{ \begin{aligned} Q1'[0] &\rightarrow -\frac{(-1 + m) Q1Circ (Q1Circ - Q2Circ) (-1 + qEqB) w14}{-Q1Circ w1 + m Q1Circ w1 + wBar}, \\ Q2'[0] &\rightarrow -\frac{(-1 + m) (Q1Circ - Q2Circ) Q2Circ qEqB w14}{-Q2Circ w2 + m Q2Circ w2 + wBar} \end{aligned} \right\} \right\}$$

QAvR0 := qEqB Q1'[0] + (1 - qEqB) Q2'[0]

QAvR0Term1 = QAvR0 /. QiDR0Rule[[1]]

$$\frac{(-1 + m) Q1Circ (Q1Circ - Q2Circ) (-1 + qEqB) qEqB w14}{-Q1Circ w1 + m Q1Circ w1 + wBar} - \frac{(-1 + m) (Q1Circ - Q2Circ) Q2Circ (1 - qEqB) qEqB w14}{-Q2Circ w2 + m Q2Circ w2 + wBar}$$

$$QAvR0Term2 = \frac{(1 - m) (1 - qEqB) qEqB Q1Circ (Q2Circ - Q1Circ) w14}{wBar - (1 - m) Q1Circ w1} - \frac{(1 - m) (1 - qEqB) qEqB (Q2Circ - Q1Circ) Q2Circ w14}{wBar - (1 - m) Q2Circ w2};$$

QAvR0Term1 - QAvR0Term2 // FullSimplify

0

QAvR0Term3 = (1 - m) (1 - qEqB) qEqB w14

$$(Q2Circ - Q1Circ) \frac{1}{wBar} \left( \frac{Q1Circ}{1 - (1 - m) Q1Circ \frac{w1}{wBar}} - \frac{Q2Circ}{1 - (1 - m) Q2Circ \frac{w2}{wBar}} \right);$$

QAvR0Term1 - QAvR0Term3 // FullSimplify

0

QAvR0Term4 = (1 - m) (1 - qEqB) qEqB w14 (-π2Circ + π1Circ)

$$\frac{1}{wBar} \left( \frac{1 - \pi1Circ}{1 - (1 - m) (1 - \pi1Circ) \frac{w1}{wBar}} - \frac{1 - \pi2Circ}{1 - (1 - m) (1 - \pi2Circ) \frac{w2}{wBar}} \right);$$

**QAvR0Term4 - QAvR0Term3 /. {π1Circ → 1 - s1Circ, π2Circ → 1 - s2Circ}**

$$-\frac{1}{w\text{Bar}} (1-m) (-Q1\text{Circ} + Q2\text{Circ}) (1 - qE\text{qB}) qE\text{qB} w14 \left( \frac{Q1\text{Circ}}{1 - \frac{(1-m) Q1\text{Circ} w1}{w\text{Bar}}} - \frac{Q2\text{Circ}}{1 - \frac{(1-m) Q2\text{Circ} w2}{w\text{Bar}}} \right) +$$

$$\frac{1}{w\text{Bar}} (1-m) (1 - qE\text{qB}) qE\text{qB} (-s1\text{Circ} + s2\text{Circ}) w14 \left( \frac{s1\text{Circ}}{1 - \frac{(1-m) s1\text{Circ} w1}{w\text{Bar}}} - \frac{s2\text{Circ}}{1 - \frac{(1-m) s2\text{Circ} w2}{w\text{Bar}}} \right)$$

**QAvR0Term4**

$$\frac{1}{w\text{Bar}} (1-m) (1 - qE\text{qB}) qE\text{qB} w14 \left( \frac{1 - \pi1\text{Circ}}{1 - \frac{(1-m) w1 (1-\pi1\text{Circ})}{w\text{Bar}}} - \frac{1 - \pi2\text{Circ}}{1 - \frac{(1-m) w2 (1-\pi2\text{Circ})}{w\text{Bar}}} \right) (\pi1\text{Circ} - \pi2\text{Circ})$$

**πAvR0Term3**

$$\frac{1}{w\text{Bar}} (1-m) (1 - qE\text{qB}) qE\text{qB} w14 \left( \frac{1 - \pi1\text{Circ}}{1 - \frac{(1-m) w1 (1-\pi1\text{Circ})}{w\text{Bar}}} - \frac{1 - \pi2\text{Circ}}{1 - \frac{(1-m) w2 (1-\pi2\text{Circ})}{w\text{Bar}}} \right) (-\pi1\text{Circ} + \pi2\text{Circ})$$

We expect the derivation of  $\bar{s}(r)$  at  $r = 0$  to be minus the derivation of  $\bar{\pi}(r)$  at  $r = 0$ :

**(-QAvR0Term4) - πAvR0Term3 // Simplify**

0

This seems to be fine.

### ■ Summary

In summary, we have found the derivation of  $\bar{\pi}(r)$  with respect to  $r$ , evaluated at  $r = 0$ , to be

$$\bar{\pi}'(0) = \frac{d}{dr} [\hat{q}_B \pi_1(r) + (1 - \hat{q}_B) \pi_2(r)]|_{r=0} =$$

$$(1-m) \hat{q}_B (1 - \hat{q}_B) (\pi_2^\circ - \pi_1^\circ) \frac{w14}{\bar{w}} \left( \frac{1 - \pi_1^\circ}{1 - (1-m)(1 - \pi_1^\circ) w1/\bar{w}} - \frac{1 - \pi_2^\circ}{1 - (1-m)(1 - \pi_2^\circ) w2/\bar{w}} \right). \quad (9)$$

We note that if we set  $m = 0$  and take  $\hat{q}_B$  as the equilibrium frequency of allele  $B_1$  if the polymorphism at locus  $\mathcal{B}$  is maintained by heterozygote superiority, then Eq. (9) is identical to Eq. (32) of Ewens (1967), except that Ewens called  $w_4$  and  $w_{22}$  what we call  $w_2$  and  $w_{14}$ , respectively.

Setting  $r = 0$  in Eq. (6), we obtain

**eq1R0 := eq1LHSalt[Q1[r], Q2[r]] == eq1RHSalt[Q1[r], Q2[r]] /. λRules /. r → 0**  
**eq2R0 := eq2LHSalt[Q1[r], Q2[r]] == eq2RHSalt[Q1[r], Q2[r]] /. λRules /. r → 0**  
**{eq1R0, eq2R0} // TableForm**

$$\text{Log}[Q1[0]] == -\frac{(1-m) w1 (1-Q1[0])}{w\text{Bar}}$$

$$\text{Log}[Q2[0]] == -\frac{(1-m) w2 (1-Q2[0])}{w\text{Bar}}$$

or, replacing  $Q_i(0) \rightarrow 1 - \pi_i^\circ$ ,

$$(1-m) \frac{w1}{\bar{w}} = -(\pi_1^\circ)^{-1} \text{Log}(1 - \pi_1^\circ) \quad (10)$$

and

$$(1-m) \frac{w2}{\bar{w}} = -(\pi_2^\circ)^{-1} \text{Log}(1 - \pi_2^\circ) \quad (11)$$

Plugging Eqs. (10) and (11) into Eq. (9), we obtain

$$\bar{\pi}'(0) = (1-m) \hat{q}_B (1 - \hat{q}_B) (\pi_2^\circ - \pi_1^\circ) \frac{w14}{\bar{w}} \left( \frac{1 - \pi_1^\circ}{1 + (\pi_1^\circ)^{-1} (1 - \pi_1^\circ) \text{Log}(1 - \pi_1^\circ)} - \frac{1 - \pi_2^\circ}{1 + (\pi_2^\circ)^{-1} (1 - \pi_2^\circ) \text{Log}(1 - \pi_2^\circ)} \right). \quad (12)$$

Let us assume that  $\pi_1^\circ > \pi_2^\circ$ . Further, we note that the function  $\frac{1-x}{1+\frac{1}{x}(1-x)\text{Log}(1-x)}$  is a decreasing function of  $x$ , because its numerator is a decreasing function and its denominator an increasing function of  $x$ . Taken together, this suggest that the derivative in Eq. (12) is always positive and hence the optimal recombination rate is always larger than zero.

```
Plot[(1 - x) / (1 + 1/x (1 - x) Log[1 - x]), {x, 0, 1}, PlotRange -> {{0, 1}, Automatic}]
```

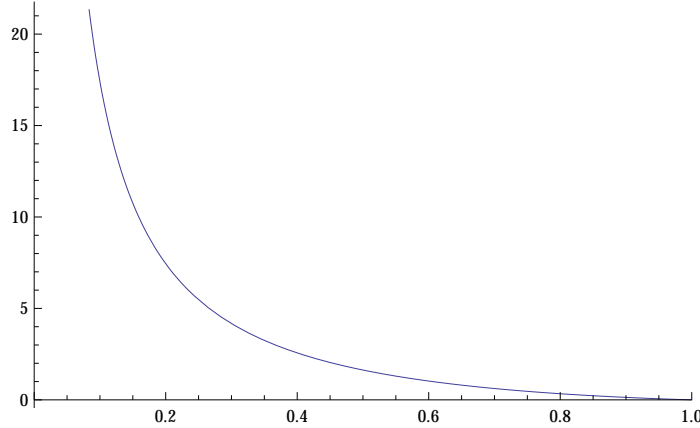

However, we now recall that our general assumption was that  $w_2 < \bar{w}$  and, with complete linkage ( $r = 0$ ), the mutant  $A_1$  cannot invade if it initially occurs on the  $B_2$  background. We therefore set  $\pi_2^\circ = 0$  in Eq. (9), which yields

$$\bar{\pi}'(0) = (1 - m) \hat{q}_B (1 - \hat{q}_B) \pi_1^\circ \frac{w_{14}}{\bar{w}} \left( \frac{\bar{w}}{\bar{w} - (1 - m) w_2} - \frac{1 - \pi_1^\circ}{1 - (1 - m) (1 - \pi_1^\circ) w_1 / \bar{w}} \right). \quad (13)$$

This is positive, if

```
FullSimplify[Reduce[ $\frac{wBar}{wBar - (1 - m) w2} - \frac{1 - \pi1Star}{1 - (1 - m) (1 - \pi1Star) w1 / wBar} > 0 /. \{m \rightarrow 0\}, w2],$ 
Assumptions -> {0 < m < 1, 0 < \pi1Star < 1, 0 < w2 < wBar < w1}]]
wBar + w1 \pi1Star < w1 || w1 < w2 + (w1 - w2 + wBar) \pi1Star
w2 (1 - \pi1Star) > w1 (1 - \pi1Star) - wBar \pi1Star
```

from which it follows that

```
w2 > w1 -  $\frac{\pi1Star}{1 - \pi1Star} wBar$ 
FullSimplify[Solve[ $\frac{wBar}{wBar - (1 - m) w2} - \frac{1 - \pi1Star}{1 - (1 - m) (1 - \pi1Star) w1 / wBar} == 0 /. \{m \rightarrow 0\}, w2]]$ 
{{w2 -> w1 +  $\frac{wBar \pi1Star}{-1 + \pi1Star}$ }}
```

if there is no migration ( $m = 0$ ) and, more generally

```
FullSimplify[Solve[ $\frac{wBar}{wBar - (1 - m) w2} - \frac{1 - \pi1Star}{1 - (1 - m) (1 - \pi1Star) w1 / wBar} == 0, w2]]$ 
{{w2 ->  $\frac{(-1 + m) w1 (-1 + \pi1Star) - wBar \pi1Star}{(-1 + m) (-1 + \pi1Star)}$ }}
 $\frac{(-1 + m) w1 (-1 + \pi1Star) - wBar \pi1Star}{(-1 + m) (-1 + \pi1Star)} - \left( w1 - \frac{wBar \pi1Star}{(1 - m) (1 - \pi1Star)} \right) // Simplify$ 
```

0



$$w_2 < w_1 - \bar{w} \frac{\pi_1^\circ}{(1-m)(1-\pi_1^\circ)} \Leftrightarrow w_1 - w_2 > \bar{w} \frac{\pi_1^\circ}{(1-m)(1-\pi_1^\circ)}. \quad (14)$$

Again, setting  $m = 0$ , we obtain the condition found earlier by Ewens (his Eq. (36)). Although condition (14) is fully generic, it is not very informative, because  $\bar{w}$  depends on the equilibrium frequency  $\hat{q}_B$  and because we do not know  $\pi_1^\circ$  explicitly. Therefore, in the following, we assume additive fitnesses and attempt to obtain approximate explicit conditions. We first consider the case of a monomorphic continent ( $q_c = 0$ ) and will then turn to the polymorphic continent ( $0 < q_c < 1$ ).

## Monomorphic continent with additive fitnesses

### Description

We start with the system of equations that must be solved to find the invasion probabilities  $\pi_i = 1 - s_i$ , where  $s_i$  is the probability of extinction of type  $i$ . We distinguish between the extinction probability  $s_i$  and the argument  $s_i$  of the probability-generating function (pgf). Throughout, we assume additive fitnesses and a monomorphic continent ( $q_c = 0$ ). The  $s_i$  are obtained as the smallest solutions  $s_i$  between 0 and 1 to the following system of equations:

$$f_1(s_1, s_2) = e^{(b(1+b+a)m - m(1-a+b)r)s_1 + (m(1-a+b)r)s_2 - b(1+b+a)m} / (b(1-a+b)) = s_1 \quad (1)$$

$$f_2(s_1, s_2) = e^{((b-(1-a)m)r)s_1 + (b(1+m(a-b)) - (b-(1-a)m)r)s_2 - b(1+m(a-b))) / (b(1-a+b))} = s_2 \quad (2)$$

where the  $f_i(s_1, s_2)$  are the pgfs of the offspring distribution.

With complete linkage ( $r = 0$ ), these two equations decouple and become

$$f_1(s_1, s_2) = f_1(s_1) = e^{-\frac{1+b+a}{1-a+b}(1-s_1)} = s_1 \quad (3)$$

$$f_2(s_1, s_2) = f_2(s_2) = e^{-\frac{1+a-m-bm}{1-a+b}(1-s_2)} = s_2. \quad (4)$$

Both equations are of the form

$$e^{-Z_i(1-s_i)} = s_i \Leftrightarrow e^{-Z_i x_i} = 1 - x_i. \quad (5)$$

Equation (5) has a solution  $s_i \in [0, 1) \Leftrightarrow Z_i > 1$ . Otherwise ( $Z_i \leq 1$ ), it has only one solution,  $s_i = 1$ . This is easily verified by considering the plots below, and by realising that  $e^{-Z_i x_i} = 1 - x_i$  always has a solution at  $x_{i(1)} = 0$ , but it only has a second solution  $x_{i(2)} \in (0, 1]$  if  $Z_i > 1$ . Note that  $x_{i(1)} = 0 < x_{i(2)}$ , and therefore  $s_{i(2)} = 1 - x_{i(2)} < s_{i(1)} = 1$ . The extinction probability is given by the smallest solution  $s_i$  between 0 and 1. Hence, we have  $0 \leq s_i < 1$  if and only if  $Z_i > 1$ .

```
Manipulate[
  Plot[{1 - x, Exp[-Z x]}, {x, 0, 10}, PlotStyle -> {{Black, Dashed}, {Black, Thick}},
  PlotRange -> {{-0.2, 1.2}, {-0.2, 1.2}}, AxesLabel -> {x, e-Zx}, {{Z, 1}, -4, 4}]
```

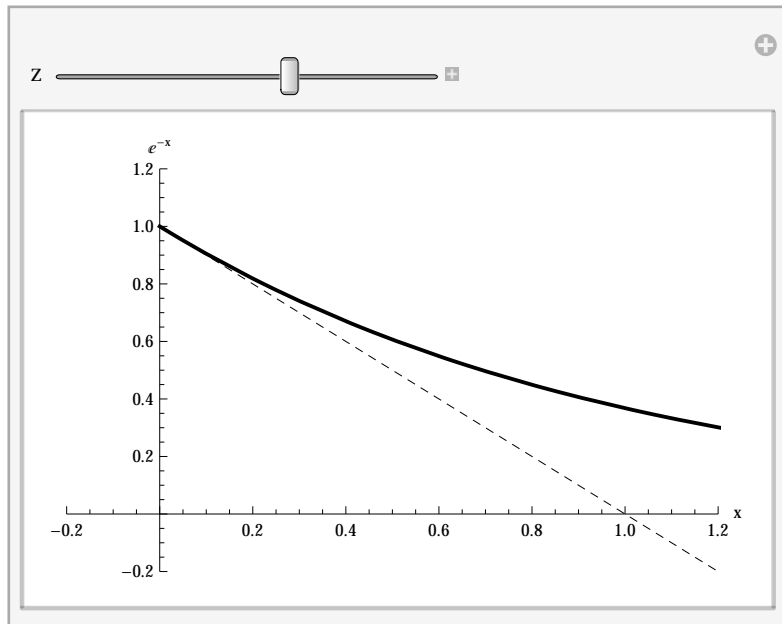

```
eqf1 = s1 == Exp[(EE + FF r) s1 - FF r s2 - EE];
eqf2 = s2 == Exp[HH r s1 + (JJ + HH r) s2 - JJ];
{eqf1, eqf2} /. r -> 0 // Simplify // TableForm

eEE (-1+s1) == s1
eJJ (-1+s2) == s2
```

## Implementation

### Exact probability-generating functions (pgf)

```
Clear[pgf1, pgf2]
```

We start with Equations (1) and (2) if full form.

```
pgf1[s1_, s2_] := e(b(1+b+a)m - m(1-a+b)r)s1 + (m(1-a+b)r)s2 - b(1+b+a)m / (b(1-a+b))
pgf2[s1_, s2_] := e((b-(1-a)m)r)s1 + (b(1+m(a-b)) - (b-(1-a)m)r)s2 - b(1+m(a-b))) / (b(1-a+b))
```

As a check, we assess if they agree with an alternative way of writing them (see Mathematica Notebook '2LocContIsland\_Stoch\_Discr.nb', expressions 'pgf1Add' and 'pgf2Add').

```
pgf1[s1, s2] - e $\frac{b^2(-1+s1) + (-1+a)m r (s1-s2) + b(-1+am(-1+s1) + s1 - m r s1 + m r s2)}{b(1-a+b)}$  // Simplify
```

0

```
pgf2[s1, s2] - e $\frac{(-1+a)m r (s1-s2) + b^2(m-m s2) + b(-1+r s1 + a m(-1+s2) + s2 - r s2)}{b(1-a+b)}$  // Simplify
```

0

### Approximate pgfs for $r = 0$

```
pgf1NoRec[s1_, s2_] := pgf1[s1, s2] /. {r -> 0} // Simplify
pgf2NoRec[s1_, s2_] := pgf2[s1, s2] /. {r -> 0} // Simplify
```

As usual, let  $\{Q_1, Q_2\}$  be the smallest solution between 0 and 1 to the system  $f_i(s_1, s_2) = s_i$  ( $i = 1, 2$ ).

```
pgf1NoRec[Q1, Q2]
```

```
e $\frac{(1+b+a m)(-1-Q1)}{-1+a-b}$ 
```

```
pgf2NoRec[Q1, Q2]
```

$$e^{-\frac{(1+a m-b m)(-1+Q_2)}{-1+a-b}}$$

As mentioned above, for  $r = 0$ , the two equations decouple (the first is independent of  $Q_2$  and the second is independent of  $Q_1$ ).

We define

```
Z1 := (1 + b + a m) / (1 - a + b);
```

```
Z2 := (1 + m (a - b)) / (1 - a + b);
```

```
FullSimplify[Reduce[Z2 < 1], Assumptions -> {0 < a < b < 1, 0 < m < 1}]
```

```
True
```

```
FullSimplify[Reduce[Z1 < 1], Assumptions -> {0 < a < b < 1, 0 < m < 1}]
```

```
False
```

where we note already here that  $Z_2 < 1$  and  $Z_1 > 1$  always, given our assumption of  $a < b$  and given the natural restriction of  $0 < m < 1$ .

We reformulate the pgfs for  $r = 0$  in terms of  $Z_i$  in a generic form.

```
pgfNR[s_] := Exp[-Z (1 - s)]
```

```
Solve[Q == pgfNR[Q] /. Z -> Z1, Q]
```

```
Solve::ifun : Inverse functions are being used by Solve, so some
solutions may not be found; use Reduce for complete solution information. >>
```

$$\left\{ \left\{ Q \rightarrow \frac{(-1 + a - b) \text{ProductLog}\left[\frac{e^{-\frac{1}{-1+a-b}} e^{-\frac{b}{-1+a-b}} e^{-\frac{am}{-1+a-b}} (1+b+am)}}{-1+a-b}\right]}{1 + b + a m} \right\} \right\}$$

An implicit solution is still not available in general, because the equation  $y = e^{-Z_1 y}$  is transcendental.

### ■ Approximate solution for $r = 0$

#### ■ Assuming small evolutionary forces – Haldane's (1927) approximation

For the time being, we omit the subscripts  $i$ . Recall that  $Q \in [0, 1)$  if and only if  $Z > 1$ . An interesting case is when invasion is just possible, i.e. when  $\pi = 1 - Q$  is close to zero. This is equivalent to  $Z$  being close to but larger than 1. We may therefore use the Ansatz  $Z = 1 + \epsilon$ ,

(6)

where  $\epsilon > 0$  is small.

```
ruleZ := {Z -> 1 + \epsilon}
```

Of course, just by making this substitution, the equation of interest remains transcendental and, generically, it is not possible to find an explicit solution.

```
pgfNR[Q]
```

$$e^{-(1-Q)Z}$$

```
Series[pgfNR[Q] /. {Z -> (1 + \epsilon)}, {\epsilon, 0, 1}] // Normal
```

$$e^{-1+Q} + e^{-1+Q} (-1 + Q) \epsilon$$

```
Solve[e^{-1+Q} + e^{-1+Q} (-1 + Q) \epsilon == Q, Q]
```

```
Solve::nsmet : This system cannot be solved with the methods available to Solve. >>
```

```
Solve[e^{-1+Q} + e^{-1+Q} (-1 + Q) \epsilon == Q, Q]
```

However, with  $Z = 1 + \epsilon$ , we know that  $Q = Q(\epsilon)$  is a function of  $\epsilon$ . Specifically, we have

$$Q(\epsilon) = e^{-(1+\epsilon)(1-Q)}$$

(7)

```
pgfNR[s] /. ruleZ
```

$$e^{-(1-s)(1+\epsilon)}$$

A Taylor series expansion of  $Q(\epsilon)$  around  $\epsilon = 0$  yields

```
Series[e-(1-Q)(1+ε), {ε, 0, 2}] // Normal
```

$$e^{-1+Q} + e^{-1+Q} (-1+Q) \epsilon + \frac{1}{2} e^{-1+Q} (-1+Q)^2 \epsilon^2$$

We know that, for  $\epsilon > 0$  small,  $Q$  must be close to 1. So, we expand  $e^{-(1-Q)(1+\epsilon)}$  around  $Q = Q_0 = 0$ .

```
term7 = Series[e-(1+ε)(1-Q), {Q, 1, 2}] // Simplify // Normal
```

$$1 + (-1+Q)(1+\epsilon) + \frac{1}{2} (-1+Q)^2 (1+\epsilon)^2$$

$$\text{testTerm7} = 1 - (1-Q)(1+\epsilon) + \frac{1}{2} (1-Q)^2 (1+\epsilon)^2$$

$$1 - (1-Q)(1+\epsilon) + \frac{1}{2} (1-Q)^2 (1+\epsilon)^2$$

```
testTerm7 - term7 // Simplify
```

```
0
```

Notice that it is important to expand this up to order  $O[Q]^2$ . Equating this and solving for  $Q$ , we obtain

```
Solve[term7 == Q, Q]
```

$$\left\{ \{Q \rightarrow 1\}, \left\{ Q \rightarrow \frac{1+\epsilon^2}{(1+\epsilon)^2} \right\} \right\}$$

Approximating the second solution ( $Q \neq 1$ ) assuming  $\epsilon > 0$  small, we find

```
Series[ $\frac{1+\epsilon^2}{(1+\epsilon)^2}$ , {ε, 0, 1}]
```

$$1 - 2\epsilon + O[\epsilon]^2$$

$$Q = 1 - \pi \approx 1 - 2\epsilon,$$

(8)

and hence

$$\pi \approx 2\epsilon$$

(9)

ignoring terms of order  $\epsilon^2$  and higher.

To identify  $\epsilon$  in the cases where  $Z = Z_1$  or  $Z = Z_2$ , we write  $Z_i$  in the form  $Z_i = 1 + \epsilon_i$ .

**Z1**

$$\frac{1+b+am}{1-a+b}$$

**Z2**

$$\frac{1+(a-b)m}{1-a+b}$$

Assuming small evolutionary forces, i.e. letting  $a \rightarrow \alpha \epsilon_i$ ,  $b \rightarrow \beta \epsilon_i$ ,  $m \rightarrow \mu \epsilon_i$  with  $\epsilon_i > 0$  small, we expand  $Z_i = Z_i(\epsilon_i)$  around  $\epsilon_i = 0$ :

```
Z1 /. ruleSmallForces /. {ε → ε1}
```

$$\frac{1+\beta \epsilon_1 + \alpha \epsilon_1^2 \mu}{1-\alpha \epsilon_1 + \beta \epsilon_1}$$

```
Z2 /. ruleSmallForces /. {ε → ε2}
```

$$\frac{1+\epsilon_2 (\alpha \epsilon_2 - \beta \epsilon_2) \mu}{1-\alpha \epsilon_2 + \beta \epsilon_2}$$

```
Series[Z1 /. ruleSmallForces /. {ε → ε1}, {ε1, 0, 1}]
```

$$1 + \alpha \epsilon_1 + O[\epsilon_1]^2$$

`Series[Z2 /. ruleSmallForces /. {ϵ → ϵ2}, {ϵ2, 0, 1}]`

$$1 + (\alpha - \beta) \epsilon_2 + O[\epsilon_2]^2$$

For  $\alpha < \beta$ , we find that  $Z_2 < 1$  always and, therefore,  $\pi_2 = 1 - Q_2 = 0$  always. The interesting case is for  $Z_1$ , which upon resubstitution of  $\alpha \rightarrow a/\epsilon_1$  becomes

$$Z_1 = 1 + a \tag{10}$$

`1 + α ϵ1 /. ruleReturnOrigin /. {ϵ → ϵ1}`

$$1 + a$$

Comparing to our Ansatz in Eq. (6), we identify  $\epsilon_1 = a$ . Plugging Eq. (10) into Eq. (8), we obtain

$$Q_1 = 1 - \pi_1 \approx 1 - 2a. \tag{11}$$

From this, we conclude that

$$\pi_1 = 1 - Q_1 \approx 2a, \tag{12}$$

which corresponds to Haldane's (1927) approximation, where  $a$  is the advantage of a heterozygote.

To summarise, for  $r = 0$  we obtain the approximate conditional invasion probabilities  $\{\pi_1, \pi_2\} \approx \{2a, 0\}$ .

However,  $\epsilon_1 = a$  is a very rough approximation; most importantly it is independent of  $m$ , which, for a model with migration, is not desirable. In the following, we try an alternative route by assuming only that  $a$  is small, but making no further assumption about  $b$  and  $m$ .

■ Assuming small  $a$  but arbitrary  $b$  and  $m$

Starting from

$$Z_1 = \frac{1 + b + a m}{1 - a + b} = 1 + \epsilon_1, \tag{13}$$

we again want to identify  $\epsilon_1$ . We may write  $Z_1$  as

$$Z_1 = \frac{1 + b + a m}{1 - a + b} = \frac{1 + b + a m}{1 + b - a} = \frac{1 + \frac{a m}{1+b}}{1 - \frac{a}{1+b}} = \left(1 + \frac{a m}{1+b}\right) \frac{1}{1 - \frac{a}{1+b}}. \tag{14}$$

Recalling the geometric series  $\frac{1}{1-r} = 1 + r + r^2 + r^3 + \dots$ , with  $r = \frac{a}{1+b}$  in our case, we find

$$Z_1 = \left(1 + \frac{a m}{1+b}\right) \left(1 + \frac{a}{1+b} + \frac{a^2}{(1+b)^2} + \dots\right), \tag{15}$$

$$\left(1 + \frac{a m}{1+b}\right) \left(1 + \frac{a}{1+b} + \frac{a^2}{(1+b)^2}\right) // \text{Expand}$$

$$1 + \frac{a^2}{(1+b)^2} + \frac{a}{1+b} + \frac{a^3 m}{(1+b)^3} + \frac{a^2 m}{(1+b)^2} + \frac{a m}{1+b}$$

which simplifies to

$$Z_1 \approx 1 + \frac{(m+1)a}{1+b} + \frac{a^2 m}{(1+b)^2}, \tag{16}$$

ignoring terms  $O[a]^3$  and higher, or to

$$Z_1 \approx 1 + \frac{(m+1)a}{1+b}, \tag{17}$$

if we only consider terms up to order  $O[a]$ . We have thus identified  $\epsilon_1$  as

$$\epsilon_1 \approx \frac{(m+1)a}{1+b}. \tag{18}$$

More directly, we have

```

Z1
  1 + b + a m
  1 - a + b
rulee1 = FullSimplify[Solve[1 + e1 == Z1, e1]]
{{e1 -> a (1 + m) / (1 - a + b)}}
FullSimplify[Series[e1 /. rulee1[[1]] /. a -> a e, {e, 0, 1}] /. {a -> a / e}] // Normal
  a (1 + m)
  1 + b
Series[Z1, {a, 0, 2}] // Normal
  a^2 (1 + m) / (1 + b)^2 + a (1 + m) / (1 + b)

```

Insertion of  $\epsilon_1$  from Eq. (18) into Eq. (8) yields

$$Q_1 = 1 - \pi_1 \approx 1 - 2 \frac{a(m+1)}{b+1} \quad (19)$$

as an approximation to the extinction probability  $Q_1$ . Recall that we set  $r = 0$ . Recall further that  $s_2 = 1$  whenever  $a < b$ , so that  $Q_2 = 1 - \pi_2 = 1$  always in our case.

Returning to the more accurate approximation of  $\epsilon_1$  in Eq. (16), we find

$$Q_1 = 1 - \pi_1 \approx 1 - 2 \left[ \frac{(m+1)a}{1+b} + \frac{a^2 m}{(1+b)^2} \right] = 1 - \frac{2a[1+b+(1+a+b)m]}{(1+b)^2}. \quad (20)$$

The invasion probability of interest at  $r = 0$  is  $\pi_1 \approx \frac{2a[1+b+(1+a+b)m]}{(1+b)^2}$ .

```

pi1Approx1 := 2 (1 + m) a / (1 + b);
pi1Approx2 := 2 a (1 + b + (1 + a + b) m) / (1 + b)^2;
Q1Approx1 := 1 - pi1Approx1;
Q1Approx2 := 1 - pi1Approx2;
Q2Approx1 := 1;
Q2Approx2 = Q2Approx1;

```

The steps in the preceding two sub-sections have been suggested by Josef Hofbauer (personal communication, March 2012).

## Derivatives of $f_i(s_1, s_2)$ for $r > 0$ but small

Taking the logarithm on both sides, Eqs. (1) and (2) can be written alternatively as

$$(\mathcal{A} + \mathcal{B}r) s_1 + C r s_2 - \mathcal{D} = \log s_1 \quad (21)$$

$$\mathcal{E} r s_1 + (\mathcal{F} + \mathcal{G}r) s_2 - \mathcal{H} = \log s_2, \quad (22)$$

where

```

ruleA := {A →  $\frac{1+b+a m}{1-a+b}$ } (* = -D *) (* Called E in the manuscript *)
ruleB := {B →  $-\frac{m}{b}$ } (* = -C *) (* Called F in the manuscript *)
ruleC := {C →  $\frac{m}{b}$ } (* = -B *) (* And hence equal to -F,
with F as in the manuscript *)
ruleD := {D →  $\frac{1+b+a m}{1-a+b}$ } (* = A *) (* Equal to E in the manuscript *)
ruleE := {E →  $\frac{b-(1-a) m}{b(1-a+b)}$ } (* = -G *) (* Called H in the manuscript *)
ruleF := {F →  $\frac{1+m(a-b)}{1-a+b}$ } (* Called J in the manuscript *)
ruleG := {G →  $-\frac{b-(1-a) m}{b(1-a+b)}$ } (* = -E *)
(* And hence equal to -H in the manuscript *)
ruleH := {H →  $\frac{1+m(a-b)}{1-a+b}$ } (* = F *) (* And hence equal to J in the manuscript *)

```

We recall that the  $Q_i$  ( $i = 1, 2$ ) are the smallest solutions between 0 and 1 to Eqs. (21) and (22). Therefore, the  $Q_i$  fulfill

$$(E + F r) Q_1 - F r Q_2 - E = \log Q_1 \quad (23)$$

$$H r Q_1 + (J - H r) Q_2 - J = \log Q_2 \quad (24)$$

where

```

ruleE := {EE →  $\frac{1+b+a m}{1-a+b}$ }
ruleF := {F →  $-\frac{m}{b}$ }
ruleH := {H →  $\frac{b-(1-a) m}{b(1-a+b)}$ }
ruleJ := {J →  $\frac{1+m(a-b)}{1-a+b}$ }

```

In the following, we use Eqs. (23) and (24).

We note from Eqs. (23) and (24) that the  $Q_i = 1 - \pi_i$  are functions of  $r$ , i.e.  $Q_i = Q_i(r)$  with  $i \in \{1, 2\}$ . This system of equations implicitly defines the  $Q_i$ , but – as shown above – an explicit solution cannot be found. Our goal is to find the derivative of  $Q_i(r)$  with respect to  $r$ , evaluated at  $r \rightarrow 0$ . In the absence of an explicit solution we resort to implicit differentiation.

```

implF1LHS[Q1_, Q2_] := (EE + F r) Q1 - F r Q2 - EE
implF1RHS[Q1_, Q2_] := Log[Q1]
implF2LHS[Q1_, Q2_] := H r Q1 + (J - H r) Q2 - J
implF2RHS[Q1_, Q2_] := Log[Q2]

implF1LHS[Q1[r], Q2[r]]
-EE + (EE + F r) Q1[r] - F r Q2[r]

(* Take  $Q_i=Q_i(r)$  and differentiate with respect to
r. Do this for the LHS and RHS of both equations above. *)
DimplF1LHS = D[implF1LHS[Q1[r], Q2[r]], r]
F Q1[r] - F Q2[r] + (EE + F r) Q1'[r] - F r Q2'[r]

DimplF1RHS = D[implF1RHS[Q1[r], Q2[r]], r]

 $\frac{Q1'[r]}{Q1[r]}$ 

```

$$\begin{aligned}
\text{DImplF2LHS} &= \text{D}[\text{implF2LHS}[Q1[r], Q2[r]], r] \\
&= H Q1[r] - H Q2[r] + H r Q1'[r] + (J - H r) Q2'[r] \\
\text{DImplF2RHS} &= \text{D}[\text{implF2RHS}[Q1[r], Q2[r]], r] \\
&= \frac{Q2'[r]}{Q2[r]}
\end{aligned}$$

From this, we obtain two equations for the derivatives  $Q_1'(r)$  and  $Q_2'(r)$  that also contain  $Q_1(r)$  and  $Q_2(r)$ :

$$\text{Deqn1} = \text{DImplF1LHS} = \text{DImplF1RHS}$$

$$F Q1[r] - F Q2[r] + (E E + F r) Q1'[r] - F r Q2'[r] = \frac{Q1'[r]}{Q1[r]}$$

$$\text{Deqn2} = \text{DImplF2LHS} = \text{DImplF2RHS}$$

$$H Q1[r] - H Q2[r] + H r Q1'[r] + (J - H r) Q2'[r] = \frac{Q2'[r]}{Q2[r]}$$

$$F Q_1(r) - F Q_2(r) + (E + F r) Q_1'(r) - F r Q_2'(r) = \frac{Q_1'(r)}{Q_1(r)} \quad (25)$$

$$H Q_1(r) - H Q_2(r) + H r Q_1'(r) + (J - H r) Q_2'(r) = \frac{Q_2'(r)}{Q_2(r)} \quad (26)$$

We want to solve for  $Q_1'(r)$  and  $Q_2'(r)$  at the position  $r = 0$ . We plug in our approximations for  $Q_1(0)$  given in Eq. (19), and  $Q_2(0) = 1$ .

$$\text{Solve}[\{\text{Deqn1}, \text{Deqn2}\} /. r \rightarrow 0, \{Q1'[0], Q2'[0]\}] // \text{FullSimplify}$$

$$\left\{ \left\{ Q1'[0] \rightarrow \frac{F Q1[0] (-Q1[0] + Q2[0])}{-1 + E E Q1[0]}, Q2'[0] \rightarrow \frac{H Q2[0] (-Q1[0] + Q2[0])}{-1 + J Q2[0]} \right\} \right\}$$

$$\text{solApprox1} = \text{Solve}[\{\text{Deqn1}, \text{Deqn2}\} /. r \rightarrow 0 /. \{Q1[0] \rightarrow Q1Approx1, Q2[0] \rightarrow Q2Approx1\}, \{Q1'[0], Q2'[0]\}] // \text{Simplify}$$

$$\left\{ \left\{ Q1'[0] \rightarrow \frac{2 a F (1 + m)}{(1 + b) \left( E E - \frac{1+b}{1+b-2 a (1+m)} \right)}, Q2'[0] \rightarrow \frac{2 a H (1 + m)}{(1 + b) (-1 + J)} \right\} \right\}$$

$$\text{solApprox1}[[1]][[All]] /.$$

$$\{\text{Flatten}[\{\text{ruleA}, \text{ruleB}, \text{ruleC}, \text{ruleD}, \text{ruleE}, \text{ruleF}, \text{ruleG}, \text{ruleH}\}]\} // \text{FullSimplify}$$

$$\left\{ \left\{ Q1'[0] \rightarrow \frac{2 a F (1 + m)}{(1 + b) \left( E E - \frac{1+b}{1+b-2 a (1+m)} \right)}, Q2'[0] \rightarrow \frac{2 a H (1 + m)}{(1 + b) (-1 + J)} \right\} \right\}$$

$$\text{DQ1Approx1} = \frac{2 (1 - a + b) m (1 + b - 2 a (1 + m))}{b (1 + b) (1 + b + 2 a m)} ;$$

$$\text{DQ2Approx1} = \frac{2 a (b - (1 - a) m)}{(a - b) b (1 + b)} ;$$

This yields

$$Q_1'(0) = \frac{2 (1 - a + b) m [1 + b - 2 a (1 + m)]}{b (1 + b) (1 + b + 2 a m)} \quad (27)$$

$$Q_2'(0) = \frac{2 a [b - (1 - a) m]}{(a - b) b (1 + b)}. \quad (28)$$

If the derivative of  $Q_1(r)$  at  $r = 0$  is positive, the derivative of  $\pi_1(r = 0)$  is negative, and vice versa.



```
Simplify[DQ1Approx1 > 0, Assumptions → assumeGeneral]
```

$$1 + b > 2 a (1 + m)$$

```
FullSimplify[DQ2Approx1 > 0, Assumptions → assumeGeneral]
```

$$m > b + a m$$

However, we are interested in the derivative of the weighted average invasion probability,  $\bar{\pi}(r)$ , at  $r = 0$ , which we can obtain by noting that

$$\begin{aligned} \frac{d\bar{\pi}(r)}{dr} &= \frac{d[\hat{q}\pi_1(r) + (1 - \hat{q})\pi_2(r)]}{dr} = \\ &= (1 - \hat{q}) \frac{d\pi_2(r)}{dr} + \hat{q} \frac{d\pi_1(r)}{dr} = (1 - \hat{q}) \frac{d[1 - Q_2(r)]}{dr} + \hat{q} \frac{d[1 - Q_1(r)]}{dr} = -\left[\hat{q} \frac{dQ_1(r)}{dr} + (1 - \hat{q}) \frac{dQ_2(r)}{dr}\right] \end{aligned} \quad (29)$$

where  $\hat{q} = \frac{b-m(1-a)}{b(1+m)}$  is the frequency of the  $B_1$  allele at the initial marginal one-locus migration-selection equilibrium. Setting  $r = 0$  and substituting our previous approximations for  $Q_i(0)$ , we obtain

$$\text{qEqRule} := \text{qEq} \rightarrow \frac{b - m(1 - a)}{b(1 + m)}$$

```
DπAverApprox1 = -qEq DQ1Approx1 - (1 - qEq) DQ2Approx1 /. qEqRule // FullSimplify
```

$$\frac{2(-1 + a - b)m(b + (-1 + a)m)(2a^2 + b + b^2 - 2a(1 + b(2 + m)))}{b^2(1 + b)(-a + b)(1 + m)(1 + b + 2am)}$$

$$\left. \frac{d\bar{\pi}(r)}{dr} \right|_{r=0} = \frac{2(1 - a + b)m[b - (1 - a)m]\{2a^2 + b + b^2 - 2a[1 + b(2 + m)]\}}{b^2(1 + b)(a - b)(1 + m)(1 + b + 2am)} \quad (30)$$

When is this positive?

```
DπAverApprox1
```

$$\frac{2(-1 + a - b)m(b + (-1 + a)m)(2a^2 + b + b^2 - 2a(1 + b(2 + m)))}{b^2(1 + b)(-a + b)(1 + m)(1 + b + 2am)}$$

```
assumeGeneral
```

$$\{0 < a < b < 1, a + b < 1, 0 < r < 0.5, 0 < m < 1\}$$

```
condApprox1 = Simplify[DπAverApprox1 > 0, Assumptions → assumeGeneral]
```

$$(b + (-1 + a)m)(2a^2 + b(1 + b) - 2a(1 + b(2 + m))) < 0$$

```
condApprox1 // FullSimplify
```

$$(b + (-1 + a)m)(2a^2 + b + b^2 - 2a(1 + b(2 + m))) < 0$$

The derivative in Eq. (30) is positive if

$$(b + (-1 + a)m)(2a^2 + b + b^2 - 2a(1 + b(2 + m))) < 0,$$

which can also be written as

$$\begin{aligned} &(b - m(1 - a))(2a^2 - 2a(1 + 2b) - 2abm + b(1 + b)) \\ &(b - (1 - a)m)(2a^2 + b(1 + b) - 2a(1 + 2b) - 2abm) \\ &\% - ((b + (-1 + a)m)(2a^2 + b(1 + b) - 2a(1 + b(2 + m)))) // FullSimplify \\ &0 \end{aligned}$$

$$[b - (1 - a)m][2a^2 + b(1 + b) - 2a(1 + 2b) - 2abm] < 0 \quad (31)$$

We want to express this condition in terms of a critical selection coefficient  $a^*$ , such that  $\left. \frac{d}{dr}\bar{\pi}(r) \right|_{r=0}$  is positive whenever  $a < a^*$ .

```

FullSimplify[Reduce[(b + (-1 + a) m) (2 a^2 + b + b^2 - 2 a (1 + b (2 + m))) < 0, a],
  Assumptions -> {0 < a < b < 1, a + b < 1, 0 < r < 0.5^, 0 < m < 1}]

(b (2 + m (4 + 3 m)) < m (2 + m (3 + 2 m)) &&
  (2 a + sqrt(1 + b (2 (1 + m) + b (2 + m (4 + m)))) < 1 + b (2 + m) || b + a m > m) ||
  (m (2 + m (3 + 2 m)) = b (2 + m (4 + 3 m)) && b + a m != m) || (b (2 + m (4 + 3 m)) > m (2 + m (3 + 2 m)) &&
  (b + a m < m || 2 a + sqrt(1 + b (2 (1 + m) + b (2 + m (4 + m)))) > 1 + b (2 + m)))

FullSimplify[Solve[(b + (-1 + a) m) (2 a^2 + b + b^2 - 2 a (1 + b (2 + m))) == 0, a],
  Assumptions -> {0 < a < b < 1, a + b < 1, 0 < r < 0.5^, 0 < m < 1}]

{{a -> 1 - b/m}, {a -> 1/2 (1 + b (2 + m) - sqrt(1 + 2 b (1 + m) + b^2 (2 + m (4 + m))))}},
  {a -> 1/2 (1 + b (2 + m) + sqrt(1 + 2 b (1 + m) + b^2 (2 + m (4 + m))))}}

FullSimplify[Reduce[0 < 1/2 (1 + b (2 + m) - sqrt(1 + 2 b (1 + m) + b^2 (2 + m (4 + m)))) < 1],
  Assumptions -> {0 < a < b < 1, a + b < 1, 0 < r < 0.5^, 0 < m < 1}]

True

FullSimplify[Reduce[0 < 1/2 (1 + b (2 + m) + sqrt(1 + 2 b (1 + m) + b^2 (2 + m (4 + m)))) < 1],
  Assumptions -> {0 < a < b < 1, a + b < 1, 0 < r < 0.5^, 0 < m < 1}]

False

```

This suggests that the first value is the one we are interested in, i.e.

$$a^* = \frac{1}{2} \left[ 1 + b(2 + m) - \sqrt{1 + 2b(1 + m) + b^2(2 + m(4 + m))} \right] \quad (32)$$

```

critValA := 1/2 (1 + b (2 + m) - sqrt(1 + 2 b (1 + m) + b^2 (2 + m (4 + m))))

Plot[{critValA /. {m -> 0.1}, critValA /. {m -> 0.2}, critValA /. {m -> 0.3},
  critValA /. {m -> 0.4}, critValA /. {m -> 0.5}, critValA /. {m -> 0.6},
  critValA /. {m -> 0.7}, critValA /. {m -> 0.8}, critValA /. {m -> 0.9}, critValA /. {m -> 1}},
  {b, 0, 1}, PlotRange -> {{0, 1}, {0, 0.5}}, AspectRatio -> Automatic,
  AxesLabel -> {b, a}, PlotLabel -> "Critical a for strictly-positive optimum r"]

```

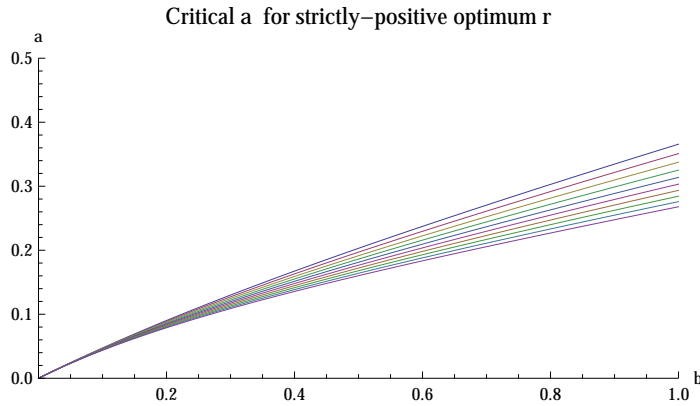

## Plots of the approximate condition for $r_{\text{opt}} \neq 0$

From now on, we denote by  $r_{\text{opt}}$  the recombination rate at which the average invasion probability  $\bar{\pi}(r)$  of  $A_1$  is maximised.

■ As a function of  $a$  and  $b$  for a given migration rate  $m$

■ Theory

We first determine the contour lines:

```
Simplify[Reduce[condApprox1Func[a, b, m] == 0, {a, b}], Assumptions -> assumeGeneral]
```

$$b + a m == m \mid \mid 2 a (2 + m) + \sqrt{1 - 4 a m + 4 a^2 (2 + 4 m + m^2)} == 1 + 2 b$$

We recognise that the first condition is equivalent to the definition of the critical migration rate for the stability of the marginal one-locus migration-selection equilibrium at the B-locus,  $m_{\text{crit},2} = \frac{b}{1-a}$ . The second condition defines a new critical migration rate that distinguishes between the regimes  $r_{\text{opt}} > 0$  and  $r_{\text{opt}} = 0$ . This is given by

$$\begin{aligned} m_{\text{critRRule}} &= \text{Solve}\left[2 a (2 + m) + \sqrt{1 - 4 a m + 4 a^2 (2 + 4 m + m^2)} == 1 + 2 b, m\right] // \text{FullSimplify} \\ &= \left\{\left\{m \rightarrow \frac{2(-1+a)a + b - 4ab + b^2}{2ab}\right\}\right\} \\ m_{r_{\text{opt}}} &= \frac{b - 2(1-a)a - 4ab + b^2}{2ab} \end{aligned} \quad (33)$$

In the plots below, the cyan and yellow contour lines both correspond to the case where  $\bar{\pi}'(r=0) = 0$ . As a function of  $a$  (and  $m$ ), the cyan line is given by  $b(a, m) = m(1-a)$  and the yellow line by

$$b(a, m) = \frac{1}{2} \left( -1 + 4a + 2am + \sqrt{1 + 8a^2 - 4am + 16a^2m + 4a^2m^2} \right) \quad (34)$$

```
Solve[b + a m == m, b]
```

```
{{b -> m - a m}}
```

```
Solve[2 a (2 + m) + sqrt[1 - 4 a m + 4 a^2 (2 + 4 m + m^2)] == 1 + 2 b, b]
```

```
{{{b -> 1/2 (-1 + 4 a + 2 a m + sqrt[1 + 8 a^2 - 4 a m + 16 a^2 m + 4 a^2 m^2])}}}
```

```
contour1[a_, m_] := m (1 - a);
```

```
contour2[a_, m_] := 1/2 (-1 + 4 a + 2 a m + sqrt[1 + 8 a^2 - 4 a m + 16 a^2 m + 4 a^2 m^2]);
```

Alternatively, we can express the contour line as a function of  $b$  and  $m$ :

```
Solve[b + a m == m, a]
```

```
{{{a -> -b + m / m}}}
```

```
Solve[2 a (2 + m) + sqrt[1 - 4 a m + 4 a^2 (2 + 4 m + m^2)] == 1 + 2 b, a]
```

```
{{{a -> 1/4 (2 + 4 b + 2 b m - sqrt[8 (-1 - b) b + (-2 - 4 b - 2 b m)^2])}},
```

```
{a -> 1/4 (2 + 4 b + 2 b m + sqrt[8 (-1 - b) b + (-2 - 4 b - 2 b m)^2])}}}
```

where only the first one is biologically valid ( $0 < a < 1$ ).

```
contour1Alt[b_, m_] := 1 - b / m;
```

```
contour2Alt[b_, m_] := 1/4 (2 + 4 b + 2 b m - sqrt[8 (-1 - b) b + (-2 - 4 b - 2 b m)^2]);
```

In the plots, the red line marks  $a = b$  (recall that we are interested in cases where  $a < b$ ). Dark grey shading represents the parameter space where, approximately,  $\bar{\pi}'(r=0) > 0 \Rightarrow r_{\text{opt}} > 0$ , and lighter grey shading represents the range where, approximately,  $\bar{\pi}'(r) < 0 \Rightarrow r_{\text{opt}} = 0$ .

```
condApprox1Func[aa_, bb_, mm_] :=
```

```
Chop[(b + (-1 + a) m) (2 a^2 + b (1 + b) - 2 a (1 + b (2 + m)))] /. {a -> aa, b -> bb, m -> mm}
```

Remarks to the plots below:

- The red line corresponds to  $a = b$ . We are only interested in the case  $a < b$ , which corresponds to the area below the red line.
- The cyan line corresponds to  $a = (m - b)/m = 1 - b/m$ , which corresponds to the critical migration rate  $m_{\text{crit},2} = \frac{b}{1-a}$ . The marginal one-locus migration-selection equilibrium  $E_B$  exists if and only if  $m < m_{\text{crit},2}$ . Existence of  $E_B$  is a necessary condition for the invasion of the  $A_1$  mutant via  $E_B$ . The area in the plots above the cyan line corresponds to the case  $m < m_{\text{crit},2}$ .
- The yellow line has the following meaning: Whenever we are above the cyan line, the yellow line separates the parameter space into a parameter sub-space where  $\bar{\pi}'(0) < 0 \Rightarrow r_{\text{opt}} = 0$  (dark grey, to the left of the yellow line) and another one where  $\bar{\pi}'(0) > 0 \Rightarrow r_{\text{opt}} > 0$  (dark purple, to the right of the yellow line).

```
FullSimplify[a /. Solve[m == b / (1 - a), a]]
```

$$\left\{1 - \frac{b}{m}\right\}$$

```
FullSimplify[Reduce[m < b / (1 - a), a], Assumptions -> {0 < a < b < 1, a + b < 1, 0 < m < 1}]
```

```
b + a m > m
```

$$m_{\text{Crit5}} := \frac{a(b - a + r)}{(a - r)(a - b) + r(1 - a)}$$

```
mCrit5 /. {r -> 0} // FullSimplify
```

```
-1
```

## ■ Plot

```

myM = 0.3; (*0.3; 0.032; 0.5;*)
myBmin = 0.;
myBmax = .6; (*0.6;0.045;1.;*)
myACoord = 2; (*0.025;2;*) (* To show a point of interest,
choose coordinates that are within the plot range *)
myBCoord = 2; (*0.04;2;*) (* To show a point of interest,
choose coordinates that are within the plot range *)
myAmin = myBmin (* Do not change this. *);
myAmax = myBmax (* Do not change this. *);
plotOptRecombRate = Show[ContourPlot[condApprox1Func[a, b, myM],
  {b, myBmin, myBmax}, {a, myAmin, myAmax}, Contours -> {-100, 0, 100},
  ContourShading -> {Red, RGBColor[0.25, 0.25, 0.25], RGBColor[0.6, 0.6, 0.6]}, Blue},
  FrameLabel -> {"Selection coefficient b", "Selection coefficient a"},
  PlotRange -> {{myBmin, myBmax}, {myBmin, myBmax}, Full},
  FrameTicksStyle -> Directive[Medium, Black, FontSize -> 16],
  LabelStyle -> {Directive[FontSize -> 20], FontFamily -> "Helvetica"}, PlotPoints -> 60],
  Plot[contour1Alt[b, myM], {b, myBmin, myBmax}, PlotStyle -> {Thick, Cyan},
  Filling -> Bottom, FillingStyle -> Directive[RGBColor[0.9, 0.9, 0.9], Opacity[1]]],
  Plot[contour2Alt[b, myM], {b, myBmin, myBmax}, PlotStyle -> {Thick, RGBColor[1, 1, 0]}],
  Plot[b, {b, myBmin, myBmax}, PlotStyle -> {Thick, Red}, Filling -> Top,
  FillingStyle -> Directive[RGBColor[0.98, 0.98, 0.98], Opacity[1]]],
  ListPlot[{{myBCoord, myACoord}}, PlotStyle -> {RGBColor[0, 1, 0, 0.65]}]]
(* Dark: critVal < 0 ⇔ π'[0] > 0 → ropt ≠ 0;
Bright: critVal > 0 ⇔ π'[0] < 0 → ropt = 0; *)

```

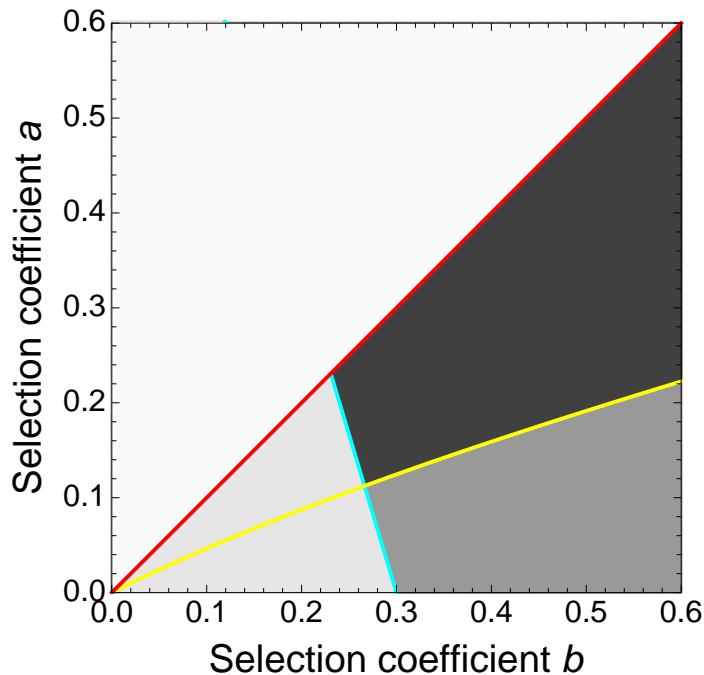

**Figure 1:** Classification of the behaviour of the average invasion probability as a function of the recombination rate,  $\bar{\pi}(r)$ . The dark grey area indicates where the derivative of  $\bar{\pi}(r)$  with respect to  $r$ , evaluated at  $r=0$ , is positive ( $\pi'(0) > 0$ ) and the optimal recombination rate is therefore positive ( $r_{\text{opt}} > 0$ ). The medium grey area shows the parameter range for which  $\pi'(0) \leq 0$  and therefore  $r_{\text{opt}} = 0$ . Together, these two areas indicate where  $A_1$  can invade via the marginal one-locus migration-selection equilibrium  $E_B$  if  $r$  is sufficiently small. The light grey area shows where  $E_B$  does not exist and  $A_1$  cannot invade. Finally, the area above  $a=b$  is not of interest, as we focus on mutations that are weakly beneficial compared to selection at the background locus ( $a < b$ ). The migration rate is  $m=0.3$ .

```

Export[figPath <> "plotOptRecombRate.tiff",
  Rasterize[plotOptRecombRate, ImageResolution -> 72], "TIFF"]
/Users/Simon/Documents/LocAdD/results/130606/nonZeroOptRecRate/figures/
  plotOptRecombRate.tiff

```

## Understanding the dependence of $\pi_1^0$ on $m$

We observed that  $\pi_1^0$  increases with the migration rate  $m$ , which is perhaps counterintuitive. Because  $\pi_1^0$  is essentially determined by the ratio of the marginal fitness  $w_1$  of  $A_1 B_1$  to the mean resident fitness  $\bar{w}$ , we investigate the dependence of  $w_1$  and  $\bar{w}$  on  $m$ .

**w1Rule**

$$w_1 \rightarrow qEqB w_{13} + (1 - qEqB) w_{14}$$

**wBarRule**

$$wBar \rightarrow qEqB^2 w_{33} + 2 (1 - qEqB) qEqB w_{34} + (1 - qEqB)^2 w_{44}$$

**qEqBRule**

$$\left\{ qB \rightarrow \frac{w_{34} - m w_{34} - wBarTilde}{(-1 + m) (w_{33} - w_{34})} \right\}$$

**w13AddRule := w13  $\rightarrow$  1 + b;**

**w14AddRule := w14  $\rightarrow$  1;**

**w33AddRule := w33  $\rightarrow$  1 - a + b;**

**w34AddRule := w34  $\rightarrow$  1 - a;**

**w44AddRule := w44  $\rightarrow$  1 - a - b;**

**addFitRule := {w13AddRule, w14AddRule, w33AddRule, w34AddRule, w44AddRule}**

$$qEqBAddRule := qEqB \rightarrow \frac{b - m (1 - a)}{b (1 + m)}$$

**w1Add = w1 /. w1Rule /. addFitRule /. qEqBAddRule // Simplify**

$$\frac{1 + b + a m}{1 + m}$$

**wBarAdd = wBar /. wBarRule /. addFitRule /. qEqBAddRule // FullSimplify**

$$\frac{(-1 + a - b) (-1 + m)}{1 + m}$$

$$wRatioAdd = \frac{w1Add}{wBarAdd} // FullSimplify$$

$$\frac{1 + b + a m}{(-1 + a - b) (-1 + m)}$$

$$w1AddFunc[m_] := \frac{1 + b + a m}{1 + m}$$

$$wBarAddFunc[m_] := \frac{(1 - a + b) (1 - m)}{1 + m}$$

$$wRatioAddFunc[m_] := \frac{1 + b + a m}{(1 - a + b) (1 - m)}$$

```

Manipulate[Plot[{w1AddFunc[m] /. {a → mya, b → myb},
  wBarAddFunc[m] /. {a → mya, b → myb}, wRatioAddFunc[m] /. {a → mya, b → myb}},
  {m, 0, 1}, PlotStyle → {{RGBColor[0.6, 0.6, 0.9]}, {Black}, {Black, Thick, Dashed}},
  Frame → True, FrameStyle → {{Black, Opacity[0]}, {Black, Opacity[0]}},
  FrameLabel → {"Migration rate m", "Fitness"},
  LabelStyle → {Directive[FontSize → 14], FontFamily → "Helvetica"}],
  {{mya, 0.02}, 0, 1}, {{myb, 0.02}, 0, 1}]

```

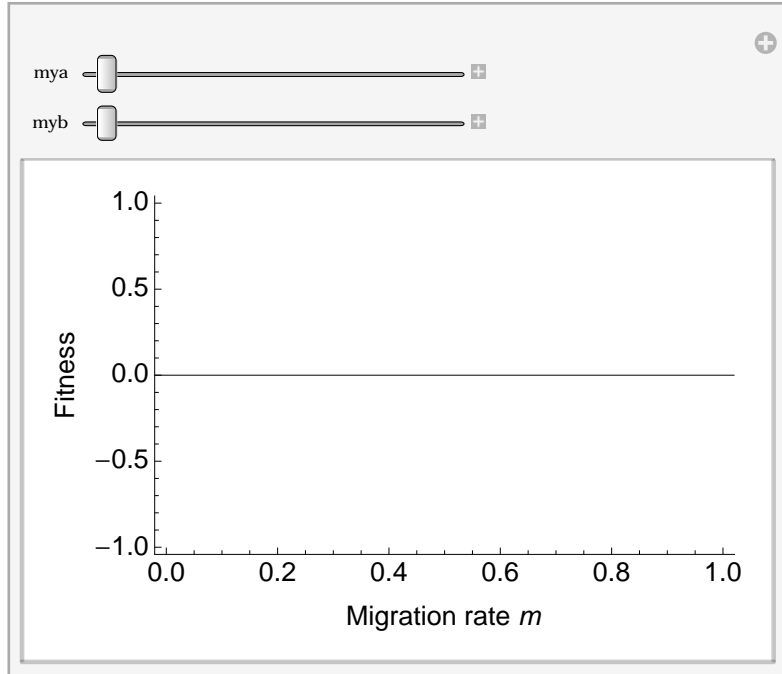

## General rules and assumptions

```

ruleSmallForces := {a → a ε, b → b ε, m → m ε, r → r ε}
ruleReturnOrigin := {α → a / ε, β → b / ε, μ → m / ε, ρ → r / ε}
ruleWeakMigration := {m → m ε}

assumeGeneral := {0 < a < b < 1, a + b < 1, 0 < r < 0.5, 0 < m < 1}

```

```

qEqRule := qEq →  $\frac{b - m + a m}{b (1 + m)}$  (* The frequency of the B1 allele at the marginal one-
  locus migration-selection equilibrium *)

```

## Functions

This function solves the system of transcendental equations obtained with the two-type branching process numerically. For a derivation, see Mathematica notebook '2LocContIsland\_Stoch\_Discr.nb'.

```

probEstablAMApproxPolymContFunc::usage =
  "probEstablAMApproxPolymContFunc[r, m1, a1, b1, γ111, γ121, γ211, γ221, qC]";
probEstablAMApproxPolymContFunc[r_, m1_, a1_, b1_, γ111_, γ121_, γ211_, γ221_, qC_] :=
  Module[{qEq, wbar, w1, w2, w14, λ1, pgf1, pgf2, qSol},

    qEq = 
$$\frac{1}{2 * b1 * (1 + m1)} \left( b1 - m1 + a1 * m1 + 2 * b1 * m1 * qC + \sqrt{(-4 * b1 * (-1 + a1 + b1) * m1 * (1 + m1) * qC + (b1 + (-1 + a1) * m1 + 2 * b1 * m1 * qC)^2)} \right);$$

    (* See 120820_twoLocusContinentIslandDiscreteDetPolyCont.nb *)
    wbar = 1 - a1 + b1 * (-1 + 2 * qEq);
    w1 = 1 + b1 * qEq + (-1 + qEq) * γ111;
    w2 = 1 + b1 * (-1 + qEq) - qEq * γ111 + γ121 * (-1 + qEq);
    w14 = 1 - γ111;
    (* Leading eigenvalue of the mean matrix; Note that q_c does *not* enter here! *)
    λ1 = - 
$$\frac{1}{2 * wbar} (-1 + m1) * \left( w1 - r * w14 + w2 + (w1^2 + r^2 * w14^2 + w1 * (2 * (-1 + 2 * qEq) * r * w14 - 2 * w2) + 2 * (1 - 2 * qEq) * r * w14 * w2 + w2^2)^{1/2} \right);$$

    (* Probability generating functions *)
    pgf1[s1_, s2_] := Exp[
      - 
$$\frac{r * (1 - m1) * (1 - qEq) * (1 - s2) * w14}{wbar} - \frac{(1 - m1) * (1 - s1) * (w1 - r * (1 - qEq) * w14)}{wbar} ];$$

    pgf2[s1_, s2_] := Exp[
      - 
$$\frac{r * (1 - m1) * qEq * (1 - s1) * w14}{wbar} - \frac{(1 - m1) * (1 - s2) * (-r * qEq * w14 + w2)}{wbar} ];$$

    qSol = FindRoot[{pgf1[q1, q2] == q1, pgf2[q1, q2] == q2}, {q1, 0.5}, {q2, 0.5}];
    (* Return the probability of establishment, 1 - q *)
    Return[{λ1, (1 - q1), (1 - q2), qEq * (1 - q1) + (1 - qEq) * (1 - q2), qEq} /. qSol]
  ];

```

## Checks

---

### ■ Using eight constants

```
b + b^2 + a b m == b (1 + b + a m) // Simplify
```

```
True
```

```
(a - 1) m r - b m r == -m (1 - a + b) r // Simplify
```

```
True
```

```
(1 - a) m r + b m r == m (1 - a + b) r // Simplify
```

```
True
```

```
b r + (a - 1) m r == (b - (1 - a) m) r // Simplify
```

```
True
```

```
b + a b m - b^2 m == b (1 + m (a - b)) // Simplify
```

```
True
```

```
-b r + (1 - a) m r == ((1 - a) m - b) r // Simplify
```

```
True
```



```
{(A + B r) s1 + C r s2 - D /. Flatten[{ruleA, ruleB, ruleC, ruleD}]} ==
  {((b (1 + b + a m) - m (1 - a + b) r) s1 + (m (1 - a + b) r) s2 - b (1 + b + a m)) / (b (1 - a + b))} //
  FullSimplify
```

True

```
{E r s1 + (F + G r) s2 - H /. Flatten[{ruleE, ruleF, ruleG, ruleH}]} ==
  {(((b - (1 - a) m) r) s1 + (b (1 + m (a - b)) - (b - (1 - a) m) r) s2 - b (1 + m (a - b))) /
  (b (1 - a + b))} // FullSimplify
```

True

#### ■ Using four constants (E, F, H, J)

```
myA = (1 - m) (w13 qhat + w14 (1 - qhat) (1 - r)) / wbar;
myB = (1 - m) r w14 qhat / wbar;
myC = (1 - m) r w14 (1 - qhat) / wbar;
myD = (1 - m) (w24 (1 - qhat) + w14 qhat (1 - r)) / wbar;
```

Additive Fitnesses

```
w14Rule = w14 → 1;
```

```
qhatRule = qhat →  $\frac{b - m (1 - a)}{b (1 + m)}$ ;
```

```
w33Rule = w33 → 1 - a + b;
```

```
w34Rule = w34 → 1 - a;
```

```
w44Rule = w44 → 1 - a - b;
```

```
w13Rule = w13 → 1 + b;
```

```
w24Rule = w24 → 1 - b;
```

```
wbarRule =
```

```
  wbar →  $\frac{qhat^2 w33 + 2 qhat (1 - qhat) w34 + (1 - qhat)^2 w44}{qhatRule /. w33Rule /. w34Rule /. w44Rule}$ ;
```

```
lambda11Add = myA /. w13Rule /. w14Rule /. qhatRule /. wbarRule // FullSimplify
```

```
 $\frac{1 + b + a m}{1 - a + b} - \frac{m r}{b}$ 
```

```
lambda21Add = myB /. w14Rule /. qhatRule /. wbarRule // FullSimplify
```

```
 $\frac{(b + (-1 + a) m) r}{b (1 - a + b)}$ 
```

```
lambda12Add = myC /. w14Rule /. qhatRule /. wbarRule // FullSimplify
```

```
 $\frac{m r}{b}$ 
```

```
lambda22Add = myD /. w24Rule /. w14Rule /. qhatRule /. wbarRule // FullSimplify
```

```
 $\frac{b + a b m - b^2 m - b r + m r - a m r}{b - a b + b^2}$ 
```

```
ARule = myA → lambda11Add;
```

```
BRule = myB → lambda21Add;
```

```
CRule = myC → lambda12Add;
```

```
DRule = myD → lambda22Add;
```

Assuming small evolutionary forces

```
assumeSmallForces := {a → α ε, b → β ε, m → μ ε, r → ρ ε}
```

```
resubst := {a → a / ε, β → b / ε, μ → m / ε, ρ → r / ε}
```

```
Series[{{lambda11Add, lambda12Add}, {lambda21Add, lambda22Add}} /. assumeSmallForces,
  {ε, 0, 1}] /. resubst // Normal // MatrixForm
```

```
 $\begin{pmatrix} 1 + a - \frac{m r}{b} & \frac{m r}{b} \\ r - \frac{m r}{b} & 1 + a - b - r + \frac{m r}{b} \end{pmatrix}$ 
```

$$\text{myE} = \frac{1 + b + a m}{1 - a + b};$$

$$\text{myF} = -\frac{m}{b};$$

$$\text{myH} = \frac{b - (1 - a) m}{b (1 - a + b)};$$

$$\text{myJ} = \frac{1 + m (a - b)}{1 - a + b};$$

$$\text{pgf1}[s1_, s2_] := e^{-\text{myA} (1-s1) - \text{myC} (1-s2)}$$

$$\text{pgf2}[s1_, s2_] := e^{-\text{myB} (1-s1) - \text{myD} (1-s2)}$$

pgf1[s1, s2] /. ARule /. CRule

$$e^{-\left(\frac{1+b+a m}{1-a+b} - \frac{m r}{b}\right) (1-s1) - \frac{m r (1-s2)}{b}}$$

pgf2[s1, s2] /. BRule /. DRule

$$e^{-\frac{(b+(-1+a) m) r (1-s1)}{b (1-a+b)} - \frac{(b+a b m - b^2 m - b r + m r - a m r) (1-s2)}{b - a b + b^2}}$$

$$\begin{aligned} & ((b (1 + b + a m) - m (1 - a + b) r) s1 + (m (1 - a + b) r) s2 - b (1 + b + a m)) / (b (1 - a + b)) == \\ & - \left( \frac{1 + b + a m}{1 - a + b} - \frac{m r}{b} \right) (1 - s1) - \frac{m r (1 - s2)}{b} // \text{FullSimplify} \end{aligned}$$

True

$$- \frac{(b + (-1 + a) m) r (1 - s1)}{b (1 - a + b)} - \frac{(b + a b m - b^2 m - b r + m r - a m r) (1 - s2)}{b - a b + b^2} ==$$

$$\left( (b - (1 - a) m) r \right) s1 + (b (1 + m (a - b)) - (b - (1 - a) m) r) s2 - b (1 + m (a - b)) / (b (1 - a + b)) // \text{FullSimplify}$$

True

$$\text{Collect}\left[-\left(\frac{1 + b + a m}{1 - a + b} - \frac{m r}{b}\right) (1 - s1) - \frac{m r (1 - s2)}{b} /. r \rightarrow 0, \{1 - s1\}\right]$$

$$-\frac{(1 + b + a m) (1 - s1)}{1 - a + b}$$

$$\text{Collect}\left[-\frac{(b + (-1 + a) m) r (1 - s1)}{b (1 - a + b)} - \frac{(b + a b m - b^2 m - b r + m r - a m r) (1 - s2)}{b - a b + b^2} /. r \rightarrow 0, \{1 - s1\}\right]$$

$$-\frac{(b + a b m - b^2 m) (1 - s2)}{b - a b + b^2}$$

$$\text{pgfAdd1}[s1_, s2_] = e^{(\text{myE} + \text{myF} r) s1 - \text{myF} r s2 - \text{myE}}$$

$$e^{-\frac{1+b+a m}{1-a+b} + \left(\frac{1+b+a m}{1-a+b} - \frac{m r}{b}\right) s1 + \frac{m r s2}{b}}$$

$$\text{pgfAdd2}[s1_, s2_] = e^{\text{myH} r s1 + (\text{myJ} - \text{myH} r) s2 - \text{myJ}}$$

$$e^{-\frac{1+(a-b) m}{1-a+b} + \frac{(b-(1-a) m) r s1}{b(1-a+b)} + \left(\frac{1+(a-b) m}{1-a+b} - \frac{(b-(1-a) m) r}{b(1-a+b)}\right) s2}$$

$$-\frac{1 + b + a m}{1 - a + b} + \left(\frac{1 + b + a m}{1 - a + b} - \frac{m r}{b}\right) s1 + \frac{m r s2}{b} ==$$

$$-\left(\frac{1 + b + a m}{1 - a + b} - \frac{m r}{b}\right) (1 - s1) - \frac{m r (1 - s2)}{b} // \text{FullSimplify}$$

True

$$\begin{aligned}
& - \frac{1 + (a - b) m}{1 - a + b} + \frac{(b - (1 - a) m) r s_1}{b (1 - a + b)} + \left( \frac{1 + (a - b) m}{1 - a + b} - \frac{(b - (1 - a) m) r}{b (1 - a + b)} \right) s_2 == \\
& - \frac{(b + (-1 + a) m) r (1 - s_1)}{b (1 - a + b)} - \frac{(b + a b m - b^2 m - b r + m r - a m r) (1 - s_2)}{b - a b + b^2} // \text{FullSimplify}
\end{aligned}$$

True

## Polymorphic continent with additive fitnesses

Not shown in detail here.

### Implementation

---

#### Derivatives of $f_i(s_1, s_2)$ for $r > 0$ but small

---

#### Assuming all evolutionary forces to be small

---
