# Supplementary material
Source: PubMed Central journal article supplement (PMC4012489)
Supplement: supp_114.163477_FileS8.pdf [file supp_114.163477_FileS8.pdf]

# The effective migration rate experienced by a neutral site linked to two loci at migration-selection balance

We assume two loci under selection ( $\mathcal{A}$  and  $\mathcal{B}$ ) and a third neutral locus  $C$ , each with two alleles denoted by  $A_1$  and  $A_2$ ,  $B_1$  and  $B_2$ , and  $C_1$  and  $C_2$ , respectively. Let the frequencies of alleles  $A_1$ ,  $A_2$ ,  $B_1$ ,  $B_2$ ,  $C_1$  and  $C_2$  be  $p$ ,  $1 - p$ ,  $q$ ,  $1 - q$ ,  $n$  and  $1 - n$ , respectively. We denote the recombination rate between locus  $i$  and  $j$  by  $r_{ij}$  and consider a continuous-time model, such that second-order terms of recombination rates can be ignored.

We first consider the case where the neutral locus lies between the selected loci, i.e.  $\mathcal{A}-C-\mathcal{B}$ . We denote the frequencies of the eight haplotypes  $A_1 C_1 B_1$ ,  $A_1 C_1 B_2$ ,  $A_2 C_1 B_1$ ,  $A_2 C_1 B_2$ ,  $A_1 C_2 B_1$ ,  $A_1 C_2 B_2$ ,  $A_2 C_2 B_1$ , and  $A_2 C_2 B_2$  by  $y_1, \dots, y_8$ , respectively. In this case, the recombination rate between locus  $\mathcal{A}$  and  $C$  is  $r_{AC}$  and the one between locus  $C$  and  $\mathcal{B}$  is  $r_{CB}$ . As mentioned, we ignore interaction terms, so that  $r_{AB} = r_{AC} + r_{CB}$ .

Later, we consider the case where the neutral locus lies to the right ( $\mathcal{A}-\mathcal{B}-C$ ) or to the left ( $C-\mathcal{A}-\mathcal{B}$ ) of the two selected loci.

As outlined by Bürger and Akerman (2011), the recursion equations due to selection and migration are immediately obtained from the two-locus migration-selection model (eq. 2.2 in Bürger and Akerman, 2011), because locus  $C$  is neutral.

In this context, we point out that equations (4.25) and (4.26) in Bürger and Akerman (2011) are wrong and need to be replaced by

## Order of loci: $\mathcal{A}-C-\mathcal{B}$

### Rules and assumptions

```

In[1]:=
recScale := {r1 → ρ1 ε, r2 → ρ2 ε}
recBackScale := {ρ1 → r1 / ε, ρ2 → r2 / ε}

In[3]:=
pDef := y1 + y2 + y5 + y6
qDef := y1 + y3 + y5 + y7
nDef := y1 + y2 + y3 + y4
DACDef := (y1 + y2) (y7 + y8) - (y5 + y6) (y3 + y4)
DCBDef := (y1 + y3) (y6 + y8) - (y2 + y4) (y5 + y7)
DABDef := (y1 + y5) (y4 + y8) - (y2 + y6) (y3 + y7)

In[9]:=
DACBDef := y1 - p q n - p DCB - q DAC - n DAB /.
  {p → pDef, q → qDef, n → nDef, DCB → DCBDef, DAC → DACDef, DAB → DABDef}

In[10]:=
gamToAllLD := {
  y1 → p q n + p DCB + q DAC + n DAB + DACB,
  y2 → p (1 - q) n - p DCB + (1 - q) DAC - n DAB - DACB,
  y3 → (1 - p) q n + (1 - p) DCB - q DAC - n DAB - DACB,
  y4 → (1 - p) (1 - q) n - (1 - p) DCB - (1 - q) DAC + n DAB + DACB,
  y5 → p q (1 - n) - p DCB - q DAC + (1 - n) DAB - DACB,
  y6 → p (1 - q) (1 - n) + p DCB - (1 - q) DAC - (1 - n) DAB + DACB,
  y7 → (1 - p) q (1 - n) - (1 - p) DCB + q DAC - (1 - n) DAB + DACB,
  y8 → (1 - p) (1 - q) (1 - n) + (1 - p) DCB + (1 - q) DAC + (1 - n) DAB - DACB
}

```

In[11]:=

```

allToGam := {
  p → y1 + y2 + y5 + y6,
  (*1-p→y3+y4+y7+y8, *)
  q → y1 + y3 + y5 + y7,
  (*1-q→y2+y4+y6+y8, *)
  n → y1 + y2 + y3 + y4
}

```

## Derivation of recursion equations

### ■ Relationships between LD coefficients, allele and gamete frequencies.

Before deriving the recursion equations, we recall some relationships between gamete frequencies, allele frequencies and linkage disequilibria:

The gamete frequencies of marginal two-locus models in terms of the gamete frequencies of the three-locus model:

$$x_1 := [A_1 B_1] = y_1 + y_5 \quad (1)$$

$$x_2 := [A_1 B_2] = y_2 + y_6 \quad (2)$$

$$x_3 := [A_2 B_1] = y_3 + y_7 \quad (3)$$

$$x_4 := [A_2 B_2] = y_4 + y_8 \quad (4)$$

$$x_5 := [A_1 C_1] = y_1 + y_2 \quad (5)$$

$$x_6 := [A_1 C_2] = y_5 + y_6 \quad (6)$$

$$x_7 := [A_2 C_1] = y_3 + y_4 \quad (7)$$

$$x_8 := [A_2 C_2] = y_7 + y_8$$

$$x_9 := [C_1 B_1] = y_1 + y_3$$

$$x_{10} := [C_1 B_2] = y_2 + y_4$$

$$x_{11} := [C_2 B_1] = y_5 + y_7$$

$$x_{12} := [C_2 B_2] = y_6 + y_8$$

The allele frequencies in terms of the gamete frequencies:

$$p = x_1 + x_2 = y_1 + y_2 + y_5 + y_6 \quad (8)$$

$$1 - p = x_3 + x_4 = y_3 + y_4 + y_7 + y_8 \quad (9)$$

$$q = x_1 + x_3 = y_1 + y_3 + y_5 + y_7 \quad (10)$$

$$1 - q = x_2 + x_4 = y_2 + y_4 + y_6 + y_8 \quad (11)$$

$$n = y_1 + y_2 + y_3 + y_4 \quad (12)$$

$$1 - n = y_5 + y_6 + y_7 + y_8 \quad (13)$$

The two-way linkage disequilibria in terms of allele and gamete frequencies:

$$D_{AB} = x_1 - p q = (y_1 + y_5) - p q = x_1 x_4 - x_2 x_3 = (y_1 + y_5)(y_4 + y_8) - (y_2 + y_6)(y_3 + y_7) \quad (14)$$

$$D_{AC} = [A_1 C_1] - p n = (y_1 + y_2) - p n = (y_1 + y_2) - [(y_1 + y_2) + (y_5 + y_6)][(y_1 + y_2) + (y_3 + y_4)] = (y_1 + y_2)(y_7 + y_8) - (y_5 + y_6)(y_3 + y_4) = x_5 x_8 - x_6 x_7 \quad (15)$$

$$D_{CB} = [C_1 B_1] - q n = (y_1 + y_3) - q n = (y_1 + y_3) - [(y_1 + y_3) + (y_5 + y_7)][(y_1 + y_3) + (y_2 + y_4)] = (y_1 + y_3)(y_6 + y_8) - (y_2 + y_4)(y_5 + y_7) = x_9 x_{12} - x_{10} x_{11} \quad (16)$$

The three-way linkage disequilibrium in terms of gamete frequencies, allele frequencies and two-way linkage disequilibria:

$$D_{ACB} = y_1 - p q n - p D_{CB} - q D_{AC} - n D_{AB} = y_1 - p q n - p [(y_1 + y_3) - q n] - q [(y_1 + y_2) - p n] - n [(y_1 + y_5) - p q] \quad (17)$$

Some marginal two-locus gamete frequencies in terms of allele frequencies and two-way linkage disequilibria:

$$x_1 = p q + D_{AB} \quad (18)$$

$$x_2 = p(1 - q) - D_{AB} \quad (19)$$

$$x_3 = (1 - p)q - D_{AB} \quad (20)$$

$$x_4 = (1 - p)(1 - q) + D_{AB} \quad (21)$$

$$x_5 = pn + D_{AC} \quad (22)$$

$$x_6 = p(1 - n) - D_{AC} \quad (23)$$

$$x_7 = (1 - p)n - D_{AC} \quad (24)$$

$$x_8 = (1 - p)(1 - n) + D_{AC} \quad (25)$$

$$x_9 = nq + D_{CB} \quad (26)$$

$$x_{10} = n(1 - q) - D_{CB} \quad (27)$$

$$x_{11} = (1 - n)q - D_{CB} \quad (28)$$

$$x_{12} = (1 - n)(1 - q) + D_{CB} \quad (29)$$

The three-locus gamete frequencies in terms of allele frequencies and two-way linkage disequilibria:

$$y_1 = pqn + pD_{CB} + qD_{AC} + nD_{AB} + D_{ACB} \quad (30)$$

$$y_2 = p(1 - q)n - pD_{CB} + (1 - q)D_{AC} - nD_{AB} - D_{ACB} \quad (31)$$

$$y_3 = (1 - p)qn + (1 - p)D_{CB} - qD_{AC} - nD_{AB} - D_{ACB} \quad (32)$$

$$y_4 = (1 - p)(1 - q)n - (1 - p)D_{CB} - (1 - q)D_{AC} + nD_{AB} + D_{ACB} \quad (33)$$

$$y_5 = pq(1 - n) - pD_{CB} - qD_{AC} + (1 - n)D_{AB} - D_{ACB} \quad (34)$$

$$y_6 = p(1 - q)(1 - n) + pD_{CB} - (1 - q)D_{AC} - (1 - n)D_{AB} + D_{ACB} \quad (35)$$

$$y_7 = (1 - p)q(1 - n) - (1 - p)D_{CB} + qD_{AC} - (1 - n)D_{AB} + D_{ACB} \quad (36)$$

$$y_8 = (1 - p)(1 - q)(1 - n) + (1 - p)D_{CB} + (1 - q)D_{AC} + (1 - n)D_{AB} - D_{ACB} \quad (37)$$

The recursion equation for  $y_1$  (gamete  $A_1 N_1 B_1$ ) in discrete time:

### ■ Automatisation of construction of difference equations under recombination

In[12]=

```
gametesProduced[parent1_, parent2_, parentFreq1_, parentFreq2_] :=
Module[{tup, factors, pf1, pf2, freqDist, δ},
  pf1 = parentFreq1;
  pf2 = parentFreq2;
  δ = 1;
  factors = {
    1/2 (1 - r1) (1 - r2), 1/2 (1 - r1) r2, 1/2 r1 r2, 1/2 r1 (1 - r2),
    1/2 r1 (1 - r2), 1/2 r1 r2, 1/2 (1 - r1) r2, 1/2 (1 - r1) (1 - r2)
  } * δ * pf1 * pf2;
  tup = Tuples[Partition[Riffle[parent1, parent2], 2]];
  freqDist = Table[Sum[factors[[i]], {i, Flatten[Position[tup, Union[tup][[i]]]}],
    {i, Length[Union[tup]]}];
  Return[{Union[tup], freqDist}];
]
```

In[13]= gametes = {{A1, C1, B1}, {A1, C1, B2}, {A2, C1, B1},  
 {A2, C1, B2}, {A1, C2, B1}, {A1, C2, B2}, {A2, C2, B1}, {A2, C2, B2}}

Out[13]= {{A1, C1, B1}, {A1, C1, B2}, {A2, C1, B1}, {A2, C1, B2},  
 {A1, C2, B1}, {A1, C2, B2}, {A2, C2, B1}, {A2, C2, B2}}

```
In[14]:= matings = Flatten[
  Table[{gametes[[i], gametes[[j]]}, {i, 1, Length[gametes]}, {j, 1, Length[gametes]}], 1]
Length[
  %]
```

```
Out[14]= {{A1, C1, B1}, {A1, C1, B1}}, {{A1, C1, B1}, {A1, C1, B2}},
  {{A1, C1, B1}, {A2, C1, B1}}, {{A1, C1, B1}, {A2, C1, B2}},
  {{A1, C1, B1}, {A1, C2, B1}}, {{A1, C1, B1}, {A1, C2, B2}}, {{A1, C1, B1}, {A2, C2, B1}},
  {{A1, C1, B1}, {A2, C2, B2}}, {{A1, C1, B2}, {A1, C1, B1}}, {{A1, C1, B2}, {A1, C1, B2}},
  {{A1, C1, B2}, {A2, C1, B1}}, {{A1, C1, B2}, {A2, C1, B2}}, {{A1, C1, B2}, {A1, C2, B1}},
  {{A1, C1, B2}, {A1, C2, B2}}, {{A1, C1, B2}, {A2, C2, B1}}, {{A1, C1, B2}, {A2, C2, B2}},
  {{A2, C1, B1}, {A1, C1, B1}}, {{A2, C1, B1}, {A1, C1, B2}}, {{A2, C1, B1}, {A2, C1, B1}},
  {{A2, C1, B1}, {A2, C1, B2}}, {{A2, C1, B1}, {A1, C2, B1}}, {{A2, C1, B1}, {A1, C2, B2}},
  {{A2, C1, B1}, {A2, C2, B1}}, {{A2, C1, B1}, {A2, C2, B2}}, {{A2, C1, B2}, {A1, C1, B1}},
  {{A2, C1, B2}, {A1, C1, B2}}, {{A2, C1, B2}, {A2, C1, B1}}, {{A2, C1, B2}, {A2, C1, B2}},
  {{A2, C1, B2}, {A1, C2, B1}}, {{A2, C1, B2}, {A1, C2, B2}}, {{A2, C1, B2}, {A2, C2, B1}},
  {{A2, C1, B2}, {A2, C2, B2}}, {{A1, C2, B1}, {A1, C1, B1}}, {{A1, C2, B1}, {A1, C1, B2}},
  {{A1, C2, B1}, {A2, C1, B1}}, {{A1, C2, B1}, {A2, C1, B2}}, {{A1, C2, B1}, {A1, C2, B1}},
  {{A1, C2, B1}, {A1, C2, B2}}, {{A1, C2, B1}, {A2, C2, B1}}, {{A1, C2, B1}, {A2, C2, B2}},
  {{A1, C2, B2}, {A1, C1, B1}}, {{A1, C2, B2}, {A1, C1, B2}}, {{A1, C2, B2}, {A2, C1, B1}},
  {{A1, C2, B2}, {A2, C1, B2}}, {{A1, C2, B2}, {A1, C2, B1}}, {{A1, C2, B2}, {A1, C2, B2}},
  {{A1, C2, B2}, {A2, C2, B1}}, {{A1, C2, B2}, {A2, C2, B2}}, {{A1, C2, B2}, {A1, C1, B1}},
  {{A2, C2, B1}, {A1, C1, B1}}, {{A2, C2, B1}, {A1, C1, B2}}, {{A2, C2, B1}, {A2, C1, B1}},
  {{A2, C2, B1}, {A2, C1, B2}}, {{A2, C2, B1}, {A1, C2, B1}}, {{A2, C2, B1}, {A2, C2, B1}},
  {{A2, C2, B1}, {A1, C2, B1}}, {{A2, C2, B1}, {A1, C2, B2}}, {{A2, C2, B1}, {A2, C2, B1}},
  {{A2, C2, B1}, {A2, C2, B2}}, {{A2, C2, B2}, {A1, C1, B1}}, {{A2, C2, B2}, {A1, C1, B2}},
  {{A2, C2, B2}, {A2, C1, B1}}, {{A2, C2, B2}, {A2, C1, B2}}, {{A2, C2, B2}, {A1, C2, B1}},
  {{A2, C2, B2}, {A1, C2, B2}}, {{A2, C2, B2}, {A2, C2, B1}}, {{A2, C2, B2}, {A2, C2, B2}}
```

```
Out[15]= 64
```

```
In[16]:= gameteFreqs = {y1, y2, y3, y4, y5, y6, y7, y8}
```

```
Out[16]= {y1, y2, y3, y4, y5, y6, y7, y8}
```

```
In[17]:= freqPairs = Flatten[Table[{gameteFreqs[[i], gameteFreqs[[j]]},
  {i, 1, Length[gameteFreqs]}, {j, 1, Length[gameteFreqs]}], 1]
% //
Length
```

```
Out[17]= {{y1, y1}, {y1, y2}, {y1, y3}, {y1, y4}, {y1, y5}, {y1, y6}, {y1, y7}, {y1, y8},
  {y2, y1}, {y2, y2}, {y2, y3}, {y2, y4}, {y2, y5}, {y2, y6}, {y2, y7}, {y2, y8},
  {y3, y1}, {y3, y2}, {y3, y3}, {y3, y4}, {y3, y5}, {y3, y6}, {y3, y7}, {y3, y8},
  {y4, y1}, {y4, y2}, {y4, y3}, {y4, y4}, {y4, y5}, {y4, y6}, {y4, y7}, {y4, y8},
  {y5, y1}, {y5, y2}, {y5, y3}, {y5, y4}, {y5, y5}, {y5, y6}, {y5, y7}, {y5, y8},
  {y6, y1}, {y6, y2}, {y6, y3}, {y6, y4}, {y6, y5}, {y6, y6}, {y6, y7}, {y6, y8},
  {y7, y1}, {y7, y2}, {y7, y3}, {y7, y4}, {y7, y5}, {y7, y6}, {y7, y7}, {y7, y8},
  {y8, y1}, {y8, y2}, {y8, y3}, {y8, y4}, {y8, y5}, {y8, y6}, {y8, y7}, {y8, y8}}
```

```
Out[18]= 64
```

```
MapThread[gametesProduced[#1[[1]], #1[[2]], #2[[1]], #2[[2]]] &,
  {matings[[1 ;; 2]], freqPairs[[1 ;; 2]]} // TableForm
```

```
A1 C1 B1 (1 - r1) (1 - r2) y12 + r1 (1 - r2) y12 + (1 - r1) r2 y12 + r1 r2 y12
A1 C1 B1  $\frac{1}{2} (1 - r1) (1 - r2) y1 y2 + \frac{1}{2} r1 (1 - r2) y1 y2 + \frac{1}{2} (1 - r1) r2 y1 y2 + \frac{1}{2} r1 r2 y1 y2$ 
A1 C1 B2  $\frac{1}{2} (1 - r1) (1 - r2) y1 y2 + \frac{1}{2} r1 (1 - r2) y1 y2 + \frac{1}{2} (1 - r1) r2 y1 y2 + \frac{1}{2} r1 r2 y1 y2$ 
```

```
In[19]:= recSep = MapThread[gametesProduced[#1[[1]], #1[[2]], #2[[1]], #2[[2]]] &, {matings, freqPairs}];
TableForm[recSep]
```

```
Out[20]//TableForm=
```

```
A1 C1 B1 (1 - r1) (1 - r2) y12 + r1 (1 - r2) y12 + (1 - r1) r2 y12 + r1 r2 y12
A1 C1 B1  $\frac{1}{2} (1 - r1) (1 - r2) y1 y2 + \frac{1}{2} r1 (1 - r2) y1 y2 + \frac{1}{2} (1 - r1) r2 y1 y2 + \frac{1}{2} r1 r2 y1 y2$ 
A1 C1 B2  $\frac{1}{2} (1 - r1) (1 - r2) y1 y2 + \frac{1}{2} r1 (1 - r2) y1 y2 + \frac{1}{2} (1 - r1) r2 y1 y2 + \frac{1}{2} r1 r2 y1 y2$ 
A1 C1 B1  $\frac{1}{2} (1 - r1) (1 - r2) y1 y3 + \frac{1}{2} r1 (1 - r2) y1 y3 + \frac{1}{2} (1 - r1) r2 y1 y3 + \frac{1}{2} r1 r2 y1 y3$ 
A2 C1 B1  $\frac{1}{2} (1 - r1) (1 - r2) y1 y3 + \frac{1}{2} r1 (1 - r2) y1 y3 + \frac{1}{2} (1 - r1) r2 y1 y3 + \frac{1}{2} r1 r2 y1 y3$ 
```

$$\begin{array}{l}
\frac{1}{2} (1 - r_1) (1 - r_2) y_1 y_4 + \frac{1}{2} r_1 r_2 y_1 y_4 \\
\begin{array}{l}
A1 \ C1 \ B1 \\
A1 \ C1 \ B2 \\
A2 \ C1 \ B1 \\
A2 \ C1 \ B2
\end{array}
\end{array}$$

$$\begin{array}{l}
\frac{1}{2} r_1 (1 - r_2) y_1 y_4 + \frac{1}{2} (1 - r_1) r_2 y_1 y_4 \\
\frac{1}{2} r_1 (1 - r_2) y_1 y_4 + \frac{1}{2} (1 - r_1) r_2 y_1 y_4 \\
\frac{1}{2} (1 - r_1) (1 - r_2) y_1 y_4 + \frac{1}{2} r_1 r_2 y_1 y_4 \\
\begin{array}{l}
A1 \ C1 \ B1 \\
A1 \ C2 \ B1
\end{array}
\end{array}$$

$$\begin{array}{l}
\frac{1}{2} (1 - r_1) (1 - r_2) y_1 y_5 + \frac{1}{2} r_1 (1 - r_2) y_1 y_5 + \frac{1}{2} (1 - r_1) r_2 y_1 y_5 + \frac{1}{2} r_1 r_2 y_1 y_5 \\
\frac{1}{2} (1 - r_1) (1 - r_2) y_1 y_5 + \frac{1}{2} r_1 (1 - r_2) y_1 y_5 + \frac{1}{2} (1 - r_1) r_2 y_1 y_5 + \frac{1}{2} r_1 r_2 y_1 y_5 \\
\begin{array}{l}
A1 \ C1 \ B1 \\
A1 \ C1 \ B2 \\
A1 \ C2 \ B1 \\
A1 \ C2 \ B2
\end{array}
\end{array}$$

$$\begin{array}{l}
\frac{1}{2} (1 - r_1) (1 - r_2) y_1 y_6 + \frac{1}{2} r_1 (1 - r_2) y_1 y_6 \\
\frac{1}{2} (1 - r_1) r_2 y_1 y_6 + \frac{1}{2} r_1 r_2 y_1 y_6 \\
\frac{1}{2} (1 - r_1) r_2 y_1 y_6 + \frac{1}{2} r_1 r_2 y_1 y_6 \\
\frac{1}{2} (1 - r_1) (1 - r_2) y_1 y_6 + \frac{1}{2} r_1 (1 - r_2) y_1 y_6 \\
\begin{array}{l}
A1 \ C1 \ B1 \\
A1 \ C2 \ B1 \\
A2 \ C1 \ B1 \\
A2 \ C2 \ B1
\end{array}
\end{array}$$

$$\begin{array}{l}
\frac{1}{2} (1 - r_1) (1 - r_2) y_1 y_7 + \frac{1}{2} (1 - r_1) r_2 y_1 y_7 \\
\frac{1}{2} r_1 (1 - r_2) y_1 y_7 + \frac{1}{2} r_1 r_2 y_1 y_7 \\
\frac{1}{2} r_1 (1 - r_2) y_1 y_7 + \frac{1}{2} r_1 r_2 y_1 y_7 \\
\frac{1}{2} (1 - r_1) (1 - r_2) y_1 y_7 + \frac{1}{2} (1 - r_1) r_2 y_1 y_7 \\
\begin{array}{l}
A1 \ C1 \ B1 \\
A1 \ C2 \ B1 \\
A2 \ C1 \ B1 \\
A2 \ C2 \ B1
\end{array}
\end{array}$$

$$\begin{array}{l}
\frac{1}{2} (1 - r_1) (1 - r_2) y_1 y_8 \\
\frac{1}{2} (1 - r_1) r_2 y_1 y_8 \\
\frac{1}{2} r_1 r_2 y_1 y_8 \\
\frac{1}{2} r_1 (1 - r_2) y_1 y_8 \\
\frac{1}{2} r_1 (1 - r_2) y_1 y_8 \\
\frac{1}{2} r_1 (1 - r_2) y_1 y_8 \\
\frac{1}{2} r_1 r_2 y_1 y_8 \\
\frac{1}{2} (1 - r_1) r_2 y_1 y_8 \\
\frac{1}{2} (1 - r_1) (1 - r_2) y_1 y_8 \\
\begin{array}{l}
A1 \ C1 \ B1 \\
A1 \ C1 \ B2 \\
A1 \ C2 \ B1 \\
A1 \ C2 \ B2 \\
A2 \ C1 \ B1 \\
A2 \ C1 \ B2 \\
A2 \ C2 \ B1 \\
A2 \ C2 \ B2
\end{array}
\end{array}$$

$$\begin{array}{l}
\frac{1}{2} (1 - r_1) (1 - r_2) y_1 y_2 + \frac{1}{2} r_1 (1 - r_2) y_1 y_2 + \frac{1}{2} (1 - r_1) r_2 y_1 y_2 + \frac{1}{2} r_1 r_2 y_1 y_2 \\
\frac{1}{2} (1 - r_1) (1 - r_2) y_1 y_2 + \frac{1}{2} r_1 (1 - r_2) y_1 y_2 + \frac{1}{2} (1 - r_1) r_2 y_1 y_2 + \frac{1}{2} r_1 r_2 y_1 y_2 \\
(1 - r_1) (1 - r_2) y_2^2 + r_1 (1 - r_2) y_2^2 + (1 - r_1) r_2 y_2^2 + r_1 r_2 y_2^2 \\
\frac{1}{2} r_1 (1 - r_2) y_2 y_3 + \frac{1}{2} (1 - r_1) r_2 y_2 y_3 \\
\frac{1}{2} (1 - r_1) (1 - r_2) y_2 y_3 + \frac{1}{2} r_1 r_2 y_2 y_3 \\
\frac{1}{2} (1 - r_1) (1 - r_2) y_2 y_3 + \frac{1}{2} r_1 r_2 y_2 y_3 \\
\frac{1}{2} r_1 (1 - r_2) y_2 y_3 + \frac{1}{2} (1 - r_1) r_2 y_2 y_3 \\
\begin{array}{l}
A1 \ C1 \ B1 \\
A1 \ C1 \ B2 \\
A2 \ C1 \ B1 \\
A2 \ C1 \ B2
\end{array}
\end{array}$$

$$\begin{array}{l}
\frac{1}{2} (1 - r_1) (1 - r_2) y_2 y_4 + \frac{1}{2} r_1 (1 - r_2) y_2 y_4 + \frac{1}{2} (1 - r_1) r_2 y_2 y_4 + \frac{1}{2} r_1 r_2 y_2 y_4 \\
\frac{1}{2} (1 - r_1) (1 - r_2) y_2 y_4 + \frac{1}{2} r_1 (1 - r_2) y_2 y_4 + \frac{1}{2} (1 - r_1) r_2 y_2 y_4 + \frac{1}{2} r_1 r_2 y_2 y_4 \\
\frac{1}{2} (1 - r_1) r_2 y_2 y_5 + \frac{1}{2} r_1 r_2 y_2 y_5 \\
\frac{1}{2} (1 - r_1) (1 - r_2) y_2 y_5 + \frac{1}{2} r_1 (1 - r_2) y_2 y_5 \\
\frac{1}{2} (1 - r_1) (1 - r_2) y_2 y_5 + \frac{1}{2} r_1 (1 - r_2) y_2 y_5 \\
\frac{1}{2} (1 - r_1) r_2 y_2 y_5 + \frac{1}{2} r_1 r_2 y_2 y_5 \\
\begin{array}{l}
A1 \ C1 \ B1 \\
A1 \ C1 \ B2 \\
A1 \ C2 \ B1 \\
A1 \ C2 \ B2
\end{array}
\end{array}$$

$$\begin{array}{l}
\frac{1}{2} (1 - r_1) (1 - r_2) y_2 y_6 + \frac{1}{2} r_1 (1 - r_2) y_2 y_6 + \frac{1}{2} (1 - r_1) r_2 y_2 y_6 + \frac{1}{2} r_1 r_2 y_2 y_6 \\
\frac{1}{2} (1 - r_1) (1 - r_2) y_2 y_6 + \frac{1}{2} r_1 (1 - r_2) y_2 y_6 + \frac{1}{2} (1 - r_1) r_2 y_2 y_6 + \frac{1}{2} r_1 r_2 y_2 y_6 \\
\begin{array}{l}
A1 \ C1 \ B1 \\
A1 \ C2 \ B1 \\
A1 \ C1 \ B2 \\
A1 \ C2 \ B2
\end{array}
\end{array}$$

$$\begin{array}{l}
\frac{1}{2} (1 - r_1) r_2 y_2 y_7 \\
\frac{1}{2} (1 - r_1) (1 - r_2) y_2 y_7 \\
A1 \ C1 \ B1 \\
A1 \ C1 \ B2 \\
A1 \ C2 \ B1 \\
A1 \ C2 \ B2 \\
A2 \ C1 \ B1 \\
A2 \ C1 \ B2 \\
A2 \ C2 \ B1 \\
A2 \ C2 \ B2 \\
\frac{1}{2} (1 - r_1) (1 - r_2) y_2 y_7 \\
\frac{1}{2} (1 - r_1) r_2 y_2 y_7 \\
\frac{1}{2} (1 - r_1) (1 - r_2) y_2 y_8 + \frac{1}{2} (1 - r_1) r_2 y_2 y_8 \\
\frac{1}{2} r_1 (1 - r_2) y_2 y_8 + \frac{1}{2} r_1 r_2 y_2 y_8 \\
A1 \ C1 \ B2 \\
A1 \ C2 \ B2 \\
A2 \ C1 \ B2 \\
A2 \ C2 \ B2 \\
\frac{1}{2} r_1 (1 - r_2) y_2 y_8 + \frac{1}{2} r_1 r_2 y_2 y_8 \\
\frac{1}{2} (1 - r_1) (1 - r_2) y_2 y_8 + \frac{1}{2} (1 - r_1) r_2 y_2 y_8 \\
A1 \ C1 \ B1 \\
A2 \ C1 \ B1 \\
\frac{1}{2} (1 - r_1) (1 - r_2) y_1 y_3 + \frac{1}{2} r_1 (1 - r_2) y_1 y_3 + \frac{1}{2} (1 - r_1) r_2 y_1 y_3 + \frac{1}{2} r_1 r_2 y_1 y_3 \\
\frac{1}{2} (1 - r_1) (1 - r_2) y_1 y_3 + \frac{1}{2} r_1 (1 - r_2) y_1 y_3 + \frac{1}{2} (1 - r_1) r_2 y_1 y_3 + \frac{1}{2} r_1 r_2 y_1 y_3 \\
\frac{1}{2} r_1 (1 - r_2) y_2 y_3 + \frac{1}{2} (1 - r_1) r_2 y_2 y_3 \\
A1 \ C1 \ B1 \\
A1 \ C1 \ B2 \\
A2 \ C1 \ B1 \\
A2 \ C1 \ B2 \\
\frac{1}{2} (1 - r_1) (1 - r_2) y_2 y_3 + \frac{1}{2} r_1 r_2 y_2 y_3 \\
\frac{1}{2} r_1 (1 - r_2) y_2 y_3 + \frac{1}{2} (1 - r_1) r_2 y_2 y_3 \\
A2 \ C1 \ B1 \\
(1 - r_1) (1 - r_2) y_3^2 + r_1 (1 - r_2) y_3^2 + (1 - r_1) r_2 y_3^2 + r_1 r_2 y_3^2 \\
A2 \ C1 \ B1 \\
A2 \ C1 \ B2 \\
\frac{1}{2} (1 - r_1) (1 - r_2) y_3 y_4 + \frac{1}{2} r_1 (1 - r_2) y_3 y_4 + \frac{1}{2} (1 - r_1) r_2 y_3 y_4 + \frac{1}{2} r_1 r_2 y_3 y_4 \\
\frac{1}{2} (1 - r_1) (1 - r_2) y_3 y_4 + \frac{1}{2} r_1 (1 - r_2) y_3 y_4 + \frac{1}{2} (1 - r_1) r_2 y_3 y_4 + \frac{1}{2} r_1 r_2 y_3 y_4 \\
\frac{1}{2} r_1 (1 - r_2) y_3 y_5 + \frac{1}{2} r_1 r_2 y_3 y_5 \\
A1 \ C1 \ B1 \\
A1 \ C2 \ B1 \\
A2 \ C1 \ B1 \\
A2 \ C2 \ B1 \\
\frac{1}{2} (1 - r_1) (1 - r_2) y_3 y_5 + \frac{1}{2} (1 - r_1) r_2 y_3 y_5 \\
\frac{1}{2} (1 - r_1) (1 - r_2) y_3 y_5 + \frac{1}{2} (1 - r_1) r_2 y_3 y_5 \\
\frac{1}{2} r_1 (1 - r_2) y_3 y_5 + \frac{1}{2} r_1 r_2 y_3 y_5 \\
\frac{1}{2} r_1 (1 - r_2) y_3 y_6 \\
\frac{1}{2} r_1 r_2 y_3 y_6 \\
A1 \ C1 \ B1 \\
A1 \ C1 \ B2 \\
A1 \ C2 \ B1 \\
A1 \ C2 \ B2 \\
A2 \ C1 \ B1 \\
A2 \ C1 \ B2 \\
A2 \ C2 \ B1 \\
A2 \ C2 \ B2 \\
\frac{1}{2} (1 - r_1) (1 - r_2) y_3 y_6 \\
\frac{1}{2} r_1 (1 - r_2) y_3 y_6 \\
\frac{1}{2} r_1 r_2 y_3 y_6 \\
\frac{1}{2} r_1 (1 - r_2) y_3 y_6 \\
\frac{1}{2} (1 - r_1) (1 - r_2) y_3 y_7 + \frac{1}{2} r_1 (1 - r_2) y_3 y_7 + \frac{1}{2} (1 - r_1) r_2 y_3 y_7 + \frac{1}{2} r_1 r_2 y_3 y_7 \\
A2 \ C1 \ B1 \\
A2 \ C2 \ B1 \\
\frac{1}{2} (1 - r_1) (1 - r_2) y_3 y_7 + \frac{1}{2} r_1 (1 - r_2) y_3 y_7 + \frac{1}{2} (1 - r_1) r_2 y_3 y_7 + \frac{1}{2} r_1 r_2 y_3 y_7 \\
\frac{1}{2} (1 - r_1) (1 - r_2) y_3 y_8 + \frac{1}{2} r_1 (1 - r_2) y_3 y_8 \\
A2 \ C1 \ B1 \\
A2 \ C1 \ B2 \\
A2 \ C2 \ B1 \\
A2 \ C2 \ B2 \\
\frac{1}{2} (1 - r_1) r_2 y_3 y_8 + \frac{1}{2} r_1 r_2 y_3 y_8 \\
\frac{1}{2} (1 - r_1) r_2 y_3 y_8 + \frac{1}{2} r_1 r_2 y_3 y_8 \\
\frac{1}{2} (1 - r_1) (1 - r_2) y_3 y_8 + \frac{1}{2} r_1 (1 - r_2) y_3 y_8 \\
\frac{1}{2} (1 - r_1) (1 - r_2) y_1 y_4 + \frac{1}{2} r_1 r_2 y_1 y_4 \\
A1 \ C1 \ B1 \\
A1 \ C1 \ B2 \\
A2 \ C1 \ B1 \\
A2 \ C1 \ B2 \\
\frac{1}{2} r_1 (1 - r_2) y_1 y_4 + \frac{1}{2} (1 - r_1) r_2 y_1 y_4 \\
\frac{1}{2} r_1 (1 - r_2) y_1 y_4 + \frac{1}{2} (1 - r_1) r_2 y_1 y_4 \\
\frac{1}{2} (1 - r_1) (1 - r_2) y_1 y_4 + \frac{1}{2} r_1 r_2 y_1 y_4
\end{array}$$

|          |                                                                                                                                 |
|----------|---------------------------------------------------------------------------------------------------------------------------------|
| A1 C1 B2 | $\frac{1}{2} (1 - r1) (1 - r2) y2 y4 + \frac{1}{2} r1 (1 - r2) y2 y4 + \frac{1}{2} (1 - r1) r2 y2 y4 + \frac{1}{2} r1 r2 y2 y4$ |
| A2 C1 B2 | $\frac{1}{2} (1 - r1) (1 - r2) y2 y4 + \frac{1}{2} r1 (1 - r2) y2 y4 + \frac{1}{2} (1 - r1) r2 y2 y4 + \frac{1}{2} r1 r2 y2 y4$ |
| A2 C1 B1 | $\frac{1}{2} (1 - r1) (1 - r2) y3 y4 + \frac{1}{2} r1 (1 - r2) y3 y4 + \frac{1}{2} (1 - r1) r2 y3 y4 + \frac{1}{2} r1 r2 y3 y4$ |
| A2 C1 B2 | $\frac{1}{2} (1 - r1) (1 - r2) y3 y4 + \frac{1}{2} r1 (1 - r2) y3 y4 + \frac{1}{2} (1 - r1) r2 y3 y4 + \frac{1}{2} r1 r2 y3 y4$ |
| A2 C1 B2 | $(1 - r1) (1 - r2) y4^2 + r1 (1 - r2) y4^2 + (1 - r1) r2 y4^2 + r1 r2 y4^2$                                                     |
|          | $\frac{1}{2} r1 r2 y4 y5$                                                                                                       |
| A1 C1 B1 | $\frac{1}{2} r1 (1 - r2) y4 y5$                                                                                                 |
| A1 C1 B2 | $\frac{1}{2} (1 - r1) (1 - r2) y4 y5$                                                                                           |
| A1 C2 B1 | $\frac{1}{2} (1 - r1) r2 y4 y5$                                                                                                 |
| A1 C2 B2 | $\frac{1}{2} (1 - r1) r2 y4 y5$                                                                                                 |
| A2 C1 B1 | $\frac{1}{2} (1 - r1) r2 y4 y5$                                                                                                 |
| A2 C1 B2 | $\frac{1}{2} (1 - r1) (1 - r2) y4 y5$                                                                                           |
| A2 C2 B1 | $\frac{1}{2} (1 - r1) (1 - r2) y4 y5$                                                                                           |
| A2 C2 B2 | $\frac{1}{2} r1 (1 - r2) y4 y5$                                                                                                 |
|          | $\frac{1}{2} r1 r2 y4 y5$                                                                                                       |
|          | $\frac{1}{2} r1 (1 - r2) y4 y6 + \frac{1}{2} r1 r2 y4 y6$                                                                       |
| A1 C1 B2 | $\frac{1}{2} (1 - r1) (1 - r2) y4 y6 + \frac{1}{2} (1 - r1) r2 y4 y6$                                                           |
| A1 C2 B2 | $\frac{1}{2} (1 - r1) (1 - r2) y4 y6 + \frac{1}{2} (1 - r1) r2 y4 y6$                                                           |
| A2 C1 B2 | $\frac{1}{2} (1 - r1) (1 - r2) y4 y6 + \frac{1}{2} r1 r2 y4 y6$                                                                 |
| A2 C2 B2 | $\frac{1}{2} (1 - r1) r2 y4 y7 + \frac{1}{2} r1 r2 y4 y7$                                                                       |
| A2 C1 B1 | $\frac{1}{2} (1 - r1) (1 - r2) y4 y7 + \frac{1}{2} r1 (1 - r2) y4 y7$                                                           |
| A2 C1 B2 | $\frac{1}{2} (1 - r1) (1 - r2) y4 y7 + \frac{1}{2} r1 (1 - r2) y4 y7$                                                           |
| A2 C2 B1 | $\frac{1}{2} (1 - r1) (1 - r2) y4 y7 + \frac{1}{2} r1 (1 - r2) y4 y7$                                                           |
| A2 C2 B2 | $\frac{1}{2} (1 - r1) r2 y4 y7 + \frac{1}{2} r1 r2 y4 y7$                                                                       |
| A2 C1 B2 | $\frac{1}{2} (1 - r1) (1 - r2) y4 y8 + \frac{1}{2} r1 (1 - r2) y4 y8 + \frac{1}{2} (1 - r1) r2 y4 y8 + \frac{1}{2} r1 r2 y4 y8$ |
| A2 C2 B2 | $\frac{1}{2} (1 - r1) (1 - r2) y4 y8 + \frac{1}{2} r1 (1 - r2) y4 y8 + \frac{1}{2} (1 - r1) r2 y4 y8 + \frac{1}{2} r1 r2 y4 y8$ |
| A1 C1 B1 | $\frac{1}{2} (1 - r1) (1 - r2) y1 y5 + \frac{1}{2} r1 (1 - r2) y1 y5 + \frac{1}{2} (1 - r1) r2 y1 y5 + \frac{1}{2} r1 r2 y1 y5$ |
| A1 C2 B1 | $\frac{1}{2} (1 - r1) (1 - r2) y1 y5 + \frac{1}{2} r1 (1 - r2) y1 y5 + \frac{1}{2} (1 - r1) r2 y1 y5 + \frac{1}{2} r1 r2 y1 y5$ |
|          | $\frac{1}{2} (1 - r1) r2 y2 y5 + \frac{1}{2} r1 r2 y2 y5$                                                                       |
| A1 C1 B1 | $\frac{1}{2} (1 - r1) (1 - r2) y2 y5 + \frac{1}{2} r1 (1 - r2) y2 y5$                                                           |
| A1 C1 B2 | $\frac{1}{2} (1 - r1) (1 - r2) y2 y5 + \frac{1}{2} r1 (1 - r2) y2 y5$                                                           |
| A1 C2 B1 | $\frac{1}{2} (1 - r1) (1 - r2) y2 y5 + \frac{1}{2} r1 (1 - r2) y2 y5$                                                           |
| A1 C2 B2 | $\frac{1}{2} (1 - r1) r2 y2 y5 + \frac{1}{2} r1 r2 y2 y5$                                                                       |
|          | $\frac{1}{2} r1 (1 - r2) y3 y5 + \frac{1}{2} r1 r2 y3 y5$                                                                       |
| A1 C1 B1 | $\frac{1}{2} (1 - r1) (1 - r2) y3 y5 + \frac{1}{2} (1 - r1) r2 y3 y5$                                                           |
| A1 C2 B1 | $\frac{1}{2} (1 - r1) (1 - r2) y3 y5 + \frac{1}{2} (1 - r1) r2 y3 y5$                                                           |
| A2 C1 B1 | $\frac{1}{2} (1 - r1) (1 - r2) y3 y5 + \frac{1}{2} (1 - r1) r2 y3 y5$                                                           |
| A2 C2 B1 | $\frac{1}{2} r1 (1 - r2) y3 y5 + \frac{1}{2} r1 r2 y3 y5$                                                                       |
|          | $\frac{1}{2} r1 r2 y4 y5$                                                                                                       |
|          | $\frac{1}{2} r1 (1 - r2) y4 y5$                                                                                                 |
| A1 C1 B1 | $\frac{1}{2} (1 - r1) (1 - r2) y4 y5$                                                                                           |
| A1 C1 B2 | $\frac{1}{2} (1 - r1) r2 y4 y5$                                                                                                 |
| A1 C2 B1 | $\frac{1}{2} (1 - r1) r2 y4 y5$                                                                                                 |
| A1 C2 B2 | $\frac{1}{2} (1 - r1) r2 y4 y5$                                                                                                 |
| A2 C1 B1 | $\frac{1}{2} (1 - r1) (1 - r2) y4 y5$                                                                                           |
| A2 C1 B2 | $\frac{1}{2} (1 - r1) (1 - r2) y4 y5$                                                                                           |
| A2 C2 B1 | $\frac{1}{2} (1 - r1) (1 - r2) y4 y5$                                                                                           |
| A2 C2 B2 | $\frac{1}{2} r1 (1 - r2) y4 y5$                                                                                                 |
|          | $\frac{1}{2} r1 r2 y4 y5$                                                                                                       |
| A1 C2 B1 | $(1 - r1) (1 - r2) y5^2 + r1 (1 - r2) y5^2 + (1 - r1) r2 y5^2 + r1 r2 y5^2$                                                     |
| A1 C2 B1 | $\frac{1}{2} (1 - r1) (1 - r2) y5 y6 + \frac{1}{2} r1 (1 - r2) y5 y6 + \frac{1}{2} (1 - r1) r2 y5 y6 + \frac{1}{2} r1 r2 y5 y6$ |
| A1 C2 B2 | $\frac{1}{2} (1 - r1) (1 - r2) y5 y6 + \frac{1}{2} r1 (1 - r2) y5 y6 + \frac{1}{2} (1 - r1) r2 y5 y6 + \frac{1}{2} r1 r2 y5 y6$ |

$$\begin{array}{l}
\begin{array}{l}
A1 \ C2 \ B1 \\
A2 \ C2 \ B1
\end{array}
\begin{array}{l}
\frac{1}{2} (1-r1) (1-r2) y5 y7 + \frac{1}{2} r1 (1-r2) y5 y7 + \frac{1}{2} (1-r1) r2 y5 y7 + \frac{1}{2} r1 r2 y5 y7 \\
\frac{1}{2} (1-r1) (1-r2) y5 y7 + \frac{1}{2} r1 (1-r2) y5 y7 + \frac{1}{2} (1-r1) r2 y5 y7 + \frac{1}{2} r1 r2 y5 y7
\end{array} \\
\\
\begin{array}{l}
A1 \ C2 \ B1 \\
A1 \ C2 \ B2 \\
A2 \ C2 \ B1 \\
A2 \ C2 \ B2
\end{array}
\begin{array}{l}
\frac{1}{2} (1-r1) (1-r2) y5 y8 + \frac{1}{2} r1 r2 y5 y8 \\
\frac{1}{2} r1 (1-r2) y5 y8 + \frac{1}{2} (1-r1) r2 y5 y8 \\
\frac{1}{2} r1 (1-r2) y5 y8 + \frac{1}{2} (1-r1) r2 y5 y8 \\
\frac{1}{2} (1-r1) (1-r2) y5 y8 + \frac{1}{2} r1 r2 y5 y8
\end{array} \\
\\
\begin{array}{l}
A1 \ C1 \ B1 \\
A1 \ C1 \ B2 \\
A1 \ C2 \ B1 \\
A1 \ C2 \ B2
\end{array}
\begin{array}{l}
\frac{1}{2} (1-r1) (1-r2) y1 y6 + \frac{1}{2} r1 (1-r2) y1 y6 \\
\frac{1}{2} (1-r1) r2 y1 y6 + \frac{1}{2} r1 r2 y1 y6 \\
\frac{1}{2} (1-r1) r2 y1 y6 + \frac{1}{2} r1 r2 y1 y6 \\
\frac{1}{2} (1-r1) (1-r2) y1 y6 + \frac{1}{2} r1 (1-r2) y1 y6
\end{array} \\
\\
\begin{array}{l}
A1 \ C1 \ B2 \\
A1 \ C2 \ B2
\end{array}
\begin{array}{l}
\frac{1}{2} (1-r1) (1-r2) y2 y6 + \frac{1}{2} r1 (1-r2) y2 y6 + \frac{1}{2} (1-r1) r2 y2 y6 + \frac{1}{2} r1 r2 y2 y6 \\
\frac{1}{2} (1-r1) (1-r2) y2 y6 + \frac{1}{2} r1 (1-r2) y2 y6 + \frac{1}{2} (1-r1) r2 y2 y6 + \frac{1}{2} r1 r2 y2 y6
\end{array} \\
\\
\begin{array}{l}
A1 \ C1 \ B1 \\
A1 \ C1 \ B2 \\
A1 \ C2 \ B1 \\
A1 \ C2 \ B2 \\
A2 \ C1 \ B1 \\
A2 \ C1 \ B2 \\
A2 \ C2 \ B1 \\
A2 \ C2 \ B2
\end{array}
\begin{array}{l}
\frac{1}{2} r1 (1-r2) y3 y6 \\
\frac{1}{2} r1 r2 y3 y6 \\
\frac{1}{2} (1-r1) r2 y3 y6 \\
\frac{1}{2} (1-r1) (1-r2) y3 y6 \\
\frac{1}{2} (1-r1) (1-r2) y3 y6 \\
\frac{1}{2} (1-r1) (1-r2) y3 y6 \\
\frac{1}{2} (1-r1) r2 y3 y6 \\
\frac{1}{2} r1 r2 y3 y6 \\
\frac{1}{2} r1 (1-r2) y3 y6
\end{array} \\
\\
\begin{array}{l}
A1 \ C1 \ B2 \\
A1 \ C2 \ B2 \\
A2 \ C1 \ B2 \\
A2 \ C2 \ B2
\end{array}
\begin{array}{l}
\frac{1}{2} r1 (1-r2) y4 y6 + \frac{1}{2} r1 r2 y4 y6 \\
\frac{1}{2} (1-r1) (1-r2) y4 y6 + \frac{1}{2} (1-r1) r2 y4 y6 \\
\frac{1}{2} (1-r1) (1-r2) y4 y6 + \frac{1}{2} (1-r1) r2 y4 y6 \\
\frac{1}{2} r1 (1-r2) y4 y6 + \frac{1}{2} r1 r2 y4 y6
\end{array} \\
\\
\begin{array}{l}
A1 \ C2 \ B1 \\
A1 \ C2 \ B2
\end{array}
\begin{array}{l}
\frac{1}{2} (1-r1) (1-r2) y5 y6 + \frac{1}{2} r1 (1-r2) y5 y6 + \frac{1}{2} (1-r1) r2 y5 y6 + \frac{1}{2} r1 r2 y5 y6 \\
\frac{1}{2} (1-r1) (1-r2) y5 y6 + \frac{1}{2} r1 (1-r2) y5 y6 + \frac{1}{2} (1-r1) r2 y5 y6 + \frac{1}{2} r1 r2 y5 y6
\end{array} \\
\\
A1 \ C2 \ B2 \quad (1-r1) (1-r2) y6^2 + r1 (1-r2) y6^2 + (1-r1) r2 y6^2 + r1 r2 y6^2 \\
\\
\begin{array}{l}
A1 \ C2 \ B1 \\
A1 \ C2 \ B2 \\
A2 \ C2 \ B1 \\
A2 \ C2 \ B2
\end{array}
\begin{array}{l}
\frac{1}{2} r1 (1-r2) y6 y7 + \frac{1}{2} (1-r1) r2 y6 y7 \\
\frac{1}{2} (1-r1) (1-r2) y6 y7 + \frac{1}{2} r1 r2 y6 y7 \\
\frac{1}{2} (1-r1) (1-r2) y6 y7 + \frac{1}{2} r1 r2 y6 y7 \\
\frac{1}{2} r1 (1-r2) y6 y7 + \frac{1}{2} (1-r1) r2 y6 y7
\end{array} \\
\\
\begin{array}{l}
A1 \ C2 \ B2 \\
A2 \ C2 \ B2
\end{array}
\begin{array}{l}
\frac{1}{2} (1-r1) (1-r2) y6 y8 + \frac{1}{2} r1 (1-r2) y6 y8 + \frac{1}{2} (1-r1) r2 y6 y8 + \frac{1}{2} r1 r2 y6 y8 \\
\frac{1}{2} (1-r1) (1-r2) y6 y8 + \frac{1}{2} r1 (1-r2) y6 y8 + \frac{1}{2} (1-r1) r2 y6 y8 + \frac{1}{2} r1 r2 y6 y8
\end{array} \\
\\
\begin{array}{l}
A1 \ C1 \ B1 \\
A1 \ C2 \ B1 \\
A2 \ C1 \ B1 \\
A2 \ C2 \ B1
\end{array}
\begin{array}{l}
\frac{1}{2} (1-r1) (1-r2) y1 y7 + \frac{1}{2} (1-r1) r2 y1 y7 \\
\frac{1}{2} r1 (1-r2) y1 y7 + \frac{1}{2} r1 r2 y1 y7 \\
\frac{1}{2} r1 (1-r2) y1 y7 + \frac{1}{2} r1 r2 y1 y7 \\
\frac{1}{2} (1-r1) (1-r2) y1 y7 + \frac{1}{2} (1-r1) r2 y1 y7
\end{array}
\end{array}$$



$$\begin{array}{l}
\frac{1}{2} (1 - r_1) r_2 y_2 y_7 \\
\frac{1}{2} (1 - r_1) (1 - r_2) y_2 y_7 \\
A1 \ C1 \ B1 \\
A1 \ C1 \ B2 \\
A1 \ C2 \ B1 \\
A1 \ C2 \ B2 \\
A2 \ C1 \ B1 \\
A2 \ C1 \ B2 \\
A2 \ C2 \ B1 \\
A2 \ C2 \ B2 \\
\frac{1}{2} (1 - r_1) (1 - r_2) y_2 y_7 \\
\frac{1}{2} (1 - r_1) r_2 y_2 y_7 \\
A2 \ C1 \ B1 \\
A2 \ C2 \ B1 \\
\frac{1}{2} (1 - r_1) (1 - r_2) y_3 y_7 + \frac{1}{2} r_1 (1 - r_2) y_3 y_7 + \frac{1}{2} (1 - r_1) r_2 y_3 y_7 + \frac{1}{2} r_1 r_2 y_3 y_7 \\
\frac{1}{2} (1 - r_1) (1 - r_2) y_3 y_7 + \frac{1}{2} r_1 (1 - r_2) y_3 y_7 + \frac{1}{2} (1 - r_1) r_2 y_3 y_7 + \frac{1}{2} r_1 r_2 y_3 y_7 \\
A2 \ C1 \ B1 \\
A2 \ C1 \ B2 \\
A2 \ C2 \ B1 \\
A2 \ C2 \ B2 \\
\frac{1}{2} (1 - r_1) r_2 y_4 y_7 + \frac{1}{2} r_1 r_2 y_4 y_7 \\
\frac{1}{2} (1 - r_1) (1 - r_2) y_4 y_7 + \frac{1}{2} r_1 (1 - r_2) y_4 y_7 \\
\frac{1}{2} (1 - r_1) (1 - r_2) y_4 y_7 + \frac{1}{2} r_1 (1 - r_2) y_4 y_7 \\
\frac{1}{2} (1 - r_1) r_2 y_4 y_7 + \frac{1}{2} r_1 r_2 y_4 y_7 \\
A1 \ C2 \ B1 \\
A2 \ C2 \ B1 \\
\frac{1}{2} (1 - r_1) (1 - r_2) y_5 y_7 + \frac{1}{2} r_1 (1 - r_2) y_5 y_7 + \frac{1}{2} (1 - r_1) r_2 y_5 y_7 + \frac{1}{2} r_1 r_2 y_5 y_7 \\
\frac{1}{2} (1 - r_1) (1 - r_2) y_5 y_7 + \frac{1}{2} r_1 (1 - r_2) y_5 y_7 + \frac{1}{2} (1 - r_1) r_2 y_5 y_7 + \frac{1}{2} r_1 r_2 y_5 y_7 \\
A1 \ C2 \ B1 \\
A1 \ C2 \ B2 \\
A2 \ C2 \ B1 \\
A2 \ C2 \ B2 \\
\frac{1}{2} r_1 (1 - r_2) y_6 y_7 + \frac{1}{2} (1 - r_1) r_2 y_6 y_7 \\
\frac{1}{2} (1 - r_1) (1 - r_2) y_6 y_7 + \frac{1}{2} r_1 r_2 y_6 y_7 \\
\frac{1}{2} (1 - r_1) (1 - r_2) y_6 y_7 + \frac{1}{2} r_1 r_2 y_6 y_7 \\
\frac{1}{2} r_1 (1 - r_2) y_6 y_7 + \frac{1}{2} (1 - r_1) r_2 y_6 y_7 \\
A2 \ C2 \ B1 \\
A2 \ C2 \ B1 \\
A2 \ C2 \ B2 \\
(1 - r_1) (1 - r_2) y_7^2 + r_1 (1 - r_2) y_7^2 + (1 - r_1) r_2 y_7^2 + r_1 r_2 y_7^2 \\
A2 \ C2 \ B1 \\
A2 \ C2 \ B2 \\
\frac{1}{2} (1 - r_1) (1 - r_2) y_7 y_8 + \frac{1}{2} r_1 (1 - r_2) y_7 y_8 + \frac{1}{2} (1 - r_1) r_2 y_7 y_8 + \frac{1}{2} r_1 r_2 y_7 y_8 \\
\frac{1}{2} (1 - r_1) (1 - r_2) y_7 y_8 + \frac{1}{2} r_1 (1 - r_2) y_7 y_8 + \frac{1}{2} (1 - r_1) r_2 y_7 y_8 + \frac{1}{2} r_1 r_2 y_7 y_8 \\
\frac{1}{2} (1 - r_1) (1 - r_2) y_1 y_8 \\
\frac{1}{2} (1 - r_1) r_2 y_1 y_8 \\
A1 \ C1 \ B1 \\
A1 \ C1 \ B2 \\
A1 \ C2 \ B1 \\
A1 \ C2 \ B2 \\
A2 \ C1 \ B1 \\
A2 \ C1 \ B2 \\
A2 \ C2 \ B1 \\
A2 \ C2 \ B2 \\
\frac{1}{2} r_1 r_2 y_1 y_8 \\
\frac{1}{2} (1 - r_1) r_2 y_1 y_8 \\
\frac{1}{2} (1 - r_1) (1 - r_2) y_1 y_8 \\
\frac{1}{2} (1 - r_1) (1 - r_2) y_2 y_8 + \frac{1}{2} (1 - r_1) r_2 y_2 y_8 \\
\frac{1}{2} r_1 (1 - r_2) y_2 y_8 + \frac{1}{2} r_1 r_2 y_2 y_8 \\
\frac{1}{2} r_1 (1 - r_2) y_2 y_8 + \frac{1}{2} r_1 r_2 y_2 y_8 \\
\frac{1}{2} (1 - r_1) (1 - r_2) y_2 y_8 + \frac{1}{2} (1 - r_1) r_2 y_2 y_8 \\
A2 \ C1 \ B1 \\
A2 \ C1 \ B2 \\
A2 \ C2 \ B1 \\
A2 \ C2 \ B2 \\
\frac{1}{2} (1 - r_1) (1 - r_2) y_3 y_8 + \frac{1}{2} r_1 (1 - r_2) y_3 y_8 \\
\frac{1}{2} (1 - r_1) r_2 y_3 y_8 + \frac{1}{2} r_1 r_2 y_3 y_8 \\
\frac{1}{2} (1 - r_1) r_2 y_3 y_8 + \frac{1}{2} r_1 r_2 y_3 y_8 \\
\frac{1}{2} (1 - r_1) (1 - r_2) y_3 y_8 + \frac{1}{2} r_1 (1 - r_2) y_3 y_8 \\
A2 \ C1 \ B2 \\
A2 \ C2 \ B2 \\
\frac{1}{2} (1 - r_1) (1 - r_2) y_4 y_8 + \frac{1}{2} r_1 (1 - r_2) y_4 y_8 + \frac{1}{2} (1 - r_1) r_2 y_4 y_8 + \frac{1}{2} r_1 r_2 y_4 y_8 \\
\frac{1}{2} (1 - r_1) (1 - r_2) y_4 y_8 + \frac{1}{2} r_1 (1 - r_2) y_4 y_8 + \frac{1}{2} (1 - r_1) r_2 y_4 y_8 + \frac{1}{2} r_1 r_2 y_4 y_8
\end{array}$$

```

A1 C2 B1  $\frac{1}{2} (1 - r1) (1 - r2) y5 y8 + \frac{1}{2} r1 r2 y5 y8$ 
A1 C2 B2  $\frac{1}{2} r1 (1 - r2) y5 y8 + \frac{1}{2} (1 - r1) r2 y5 y8$ 
A2 C2 B1  $\frac{1}{2} r1 (1 - r2) y5 y8 + \frac{1}{2} (1 - r1) r2 y5 y8$ 
A2 C2 B2  $\frac{1}{2} (1 - r1) (1 - r2) y5 y8 + \frac{1}{2} r1 r2 y5 y8$ 

A1 C2 B2  $\frac{1}{2} (1 - r1) (1 - r2) y6 y8 + \frac{1}{2} r1 (1 - r2) y6 y8 + \frac{1}{2} (1 - r1) r2 y6 y8 + \frac{1}{2} r1 r2 y6 y8$ 
A2 C2 B2  $\frac{1}{2} (1 - r1) (1 - r2) y6 y8 + \frac{1}{2} r1 (1 - r2) y6 y8 + \frac{1}{2} (1 - r1) r2 y6 y8 + \frac{1}{2} r1 r2 y6 y8$ 

A2 C2 B1  $\frac{1}{2} (1 - r1) (1 - r2) y7 y8 + \frac{1}{2} r1 (1 - r2) y7 y8 + \frac{1}{2} (1 - r1) r2 y7 y8 + \frac{1}{2} r1 r2 y7 y8$ 
A2 C2 B2  $\frac{1}{2} (1 - r1) (1 - r2) y7 y8 + \frac{1}{2} r1 (1 - r2) y7 y8 + \frac{1}{2} (1 - r1) r2 y7 y8 + \frac{1}{2} r1 r2 y7 y8$ 

A2 C2 B2  $(1 - r1) (1 - r2) y8^2 + r1 (1 - r2) y8^2 + (1 - r1) r2 y8^2 + r1 r2 y8^2$ 

```

```
recSep[[1, 1]]
```

```
recSep[[1, 2]]
```

```
{{A1, C1, B1}}
```

```
{(1 - r1) (1 - r2) y12 + r1 (1 - r2) y12 + (1 - r1) r2 y12 + r1 r2 y12}
```

```
indices = Table[Position[recSep[[i, 1]], gametes[[2]], {i, Length[recSep]}]
```

```
{ {}, {{2}}, {}, {{2}}, {}, {{2}}, {}, {{2}}, {{2}}, {{1}}, {{2}}, {{1}}, {{2}}, {{1}},
{{2}}, {{1}}, {}, {{2}}, {}, {}, {}, {{2}}, {}, {}, {{2}}, {{1}}, {}, {}, {{2}},
{{1}}, {}, {}, {}, {{2}}, {}, {{2}}, {}, {}, {}, {}, {{2}}, {{1}}, {{2}}, {{1}}, {},
 {}, {}, {}, {}, {{2}}, {}, {}, {}, {}, {}, {}, {{2}}, {{1}}, {}, {}, {}, {}, {} }
```

```
Flatten[Table[Part[recSep, i, 2][Flatten[indices[[i]]]], {i, Length[indices]}] //
Total // FullSimplify
```

```
y22 + r1 (r2 y3 y6 + y4 (y5 - r2 y5 + y6)) +
y2 ((1 - r2 + r1 (-1 + 2 r2)) y3 + y4 + y5 - r2 y5 + y6 + (-1 + r1) ((-1 + r2) y7 - y8)) +
y1 (y2 + r2 (y4 + y6 + y8) + r1 (y4 - 2 r2 y4 - r2 y8))
```

In[21]=

```

sumPerOffspringGamete[gametes_, gameteIndex_, separateRe recursions_] :=
Module[{indices, recSep, sum},
  recSep = separateRe recursions;
  indices =
    Table[Position[recSep[[i, 1]], gametes[[gameteIndex]], {i, Length[recSep]}];
  sum = Flatten[Table[Part[recSep, i, 2][Flatten[indices[[i]]]],
    {i, Length[indices]}] // Total;
  Return[sum]
]

```

## ■ Differential equations under recombination

### ■ In terms of gamete frequencies

```
rec1 = sumPerOffspringGamete[gametes, 1, recSep] // FullSimplify
```

```
y12 + r2 y2 (y3 + y5 + y7) + r1 (r2 y4 y5 + y3 (y5 + y6 - r2 y6) + y2 (y3 - 2 r2 y3 - r2 y7)) +
y1 (y2 + y3 + (1 - r2 + r1 (-1 + 2 r2)) y4 + y5 + y6 - r2 y6 - (-1 + r1) (y7 + y8 - r2 y8))
```

The corresponding continuous-time differential equation:

```
y1D = FullSimplify[Series[rec1 - y1 /. recScale, {ε, 0, 1}] /. recBackScale // Normal]
```

```
y12 + r1 y3 (y2 + y5 + y6) + r2 y2 (y3 + y5 + y7) +
y1 (-1 + y2 + y3 - (-1 + r1 + r2) y4 + y5 + y6 + y7 + y8 - r2 (y6 + y8) - r1 (y7 + y8))
```

```
Collect[y1D, {r1, r2}]
```

```
-y1 + y12 + y1 y2 + y1 y3 + y1 y4 + y1 y5 + y1 y6 + y1 y7 + y1 y8 +
r2 (-y1 y4 + y2 (y3 + y5 + y7) - y1 (y6 + y8)) + r1 (-y1 y4 + y3 (y2 + y5 + y6) - y1 (y7 + y8))
```

```
FullSimplify[{-y1 + y12 + y1 y2 + y1 y3 + y1 y4 + y1 y5 + y1 y6 + y1 y7 + y1 y8},
Assumptions → {y8 == 1 - y1 - y2 - y3 - y4 - y5 - y6 - y7, y1 + y2 + y3 + y4 + y5 + y6 + y7 + y8 == 1}]
```

0

We note that 'y1D' can be simplified to

```
In[22]:=
y1DotRec := -r1 (y1 (1 - p) - y3 p) - r2 (y1 (1 - q) - y2 q)

y1DotRec - y1D /. {p → y1 + y2 + y5 + y6, q → y1 + y3 + y5 + y7} //.
{y1 → 1 - (y2 + y3 + y4 + y5 + y6 + y7 + y8)} // Simplify

0
```

The following test term is from an independent derivation of Reinhard Bürger (personal communication).

```
testTerm1 := r2 (y[2] (y[3] + y[5] + y[7]) - y[1] (y[4] + y[6] + y[8])) +
r1 (y[3] (y[2] + y[5] + y[6]) - y[1] (y[4] + y[7] + y[8])) /.
{y[1] → y1, y[2] → y2, y[3] → y3, y[4] → y4, y[5] → y5, y[6] → y6, y[7] → y7, y[8] → y8}

r2 (-y1 y4 + y2 (y3 + y5 + y7) - y1 (y6 + y8)) +
r1 (-y1 y4 + y3 (y2 + y5 + y6) - y1 (y7 + y8)) - testTerm1 // Simplify

0

rec2 = sumPerOffspringGamete[gametes, 2, recSep] // FullSimplify

y22 + r1 (r2 y3 y6 + y4 (y5 - r2 y5 + y6)) +
y2 ((1 - r2 + r1 (-1 + 2 r2)) y3 + y4 + y5 - r2 y5 + y6 + (-1 + r1) ((-1 + r2) y7 - y8)) +
y1 (y2 + r2 (y4 + y6 + y8) + r1 (y4 - 2 r2 y4 - r2 y8))

y2D = FullSimplify[Series[rec2 - y2 /. recScale, {ε, 0, 1}] /. recBackScale // Normal]

y22 + r1 y4 (y1 + y5 + y6) + r2 y1 (y4 + y6 + y8) +
y2 (-1 + y1 - (-1 + r1 + r2) y3 + y4 + y5 + y6 + y7 - r2 (y5 + y7) + y8 - r1 (y7 + y8))

Collect[y2D, {r1, r2}]

-y2 + y1 y2 + y22 + y2 y3 + y2 y4 + y2 y5 + y2 y6 + y2 y7 + y2 y8 +
r2 (-y2 y3 - y2 (y5 + y7) + y1 (y4 + y6 + y8)) + r1 (-y2 y3 + y4 (y1 + y5 + y6) - y2 (y7 + y8))

FullSimplify[(-y2 + y1 y2 + y22 + y2 y3 + y2 y4 + y2 y5 + y2 y6 + y2 y7 + y2 y8),
Assumptions → {y8 == 1 - y1 - y2 - y3 - y4 - y5 - y6 - y7, y1 + y2 + y3 + y4 + y5 + y6 + y7 + y8 == 1}]

0
```

```
In[23]:=
y2DotRec := -r1 (y2 (1 - p) - y4 p) - r2 (y2 q - y1 (1 - q))

y2DotRec - y2D /. {p → y1 + y2 + y5 + y6, q → y1 + y3 + y5 + y7} //.
{y1 → 1 - (y2 + y3 + y4 + y5 + y6 + y7 + y8)} // Simplify

0
```

The following test term is from an independent derivation of Reinhard Bürger (personal communication).

```
testTerm2 := r2 (-y[2] (y[3] + y[5] + y[7]) + y[1] (y[4] + y[6] + y[8])) +
r1 (y[4] (y[1] + y[5] + y[6]) - y[2] (y[3] + y[7] + y[8])) /.
{y[1] → y1, y[2] → y2, y[3] → y3, y[4] → y4, y[5] → y5, y[6] → y6, y[7] → y7, y[8] → y8}

r2 (-y2 y3 - y2 (y5 + y7) + y1 (y4 + y6 + y8)) +
r1 (-y2 y3 + y4 (y1 + y5 + y6) - y2 (y7 + y8)) - testTerm2 // Simplify

0

rec3 = sumPerOffspringGamete[gametes, 3, recSep] // FullSimplify

y32 + y3 y4 + y3 y5 - r1 y3 y5 + r2 y4 y5 - r1 r2 y4 y5 + y3 y6 - r1 y3 y6 - r2 y3 y6 +
r1 r2 y3 y6 + y3 y7 + r2 y4 y7 + y2 (y3 - r1 y3 - r2 y3 + 2 r1 r2 y3 + r1 r2 y7) +
y3 y8 - r2 y3 y8 + y1 (y3 + r2 y4 + r1 (y4 - 2 r2 y4 + y7 + y8 - r2 y8))

y3D = FullSimplify[Series[rec3 - y3 /. recScale, {ε, 0, 1}] /. recBackScale // Normal]

y32 + r2 y4 (y1 + y5 + y7) + r1 y1 (y4 + y7 + y8) +
y3 (-1 + y1 - (-1 + r1 + r2) y2 + y4 + y5 + y6 - r1 (y5 + y6) + y7 + y8 - r2 (y6 + y8))
```

```

Collect[y3D, {r1, r2}]

-y3 + y1 y3 + y2 y3 + y32 + y3 y4 + y3 y5 + y3 y6 + y3 y7 + y3 y8 +
r2 (-y2 y3 + y4 (y1 + y5 + y7) - y3 (y6 + y8)) + r1 (-y2 y3 - y3 (y5 + y6) + y1 (y4 + y7 + y8))

FullSimplify[(-y3 + y1 y3 + y2 y3 + y32 + y3 y4 + y3 y5 + y3 y6 + y3 y7 + y3 y8),
Assumptions -> {y8 == 1 - y1 - y2 - y3 - y4 - y5 - y6 - y7, y1 + y2 + y3 + y4 + y5 + y6 + y7 + y8 == 1}]
0

```

In[24]:=

```

y3DotRec := -r1 (y3 p - y1 (1 - p)) - r2 (y3 (1 - q) - y4 q)

y3DotRec - y3D /. {p -> y1 + y2 + y5 + y6, q -> y1 + y3 + y5 + y7} //.
{y1 -> 1 - (y2 + y3 + y4 + y5 + y6 + y7 + y8)} // Simplify
0

```

The following test term is from an independent derivation of Reinhard Bürger (personal communication).

```

testTerm3 := r2 (y[4] (y[1] + y[5] + y[7]) - y[3] (y[2] + y[6] + y[8])) +
r1 (-y[3] (y[2] + y[5] + y[6]) + y[1] (y[4] + y[7] + y[8])) /.
{y[1] -> y1, y[2] -> y2, y[3] -> y3, y[4] -> y4, y[5] -> y5, y[6] -> y6, y[7] -> y7, y[8] -> y8}

r2 (-y2 y3 + y4 (y1 + y5 + y7) - y3 (y6 + y8)) +
r1 (-y2 y3 - y3 (y5 + y6) + y1 (y4 + y7 + y8)) - testTerm3 // Simplify
0

rec4 = sumPerOffspringGamete[gametes, 4, recSep] // FullSimplify

y4 (y1 + y2 + y3 + y4 + y5 + y6 + y7 + y8) + r2 (-y4 (y1 + y5 + y7) + y3 (y2 + y6 + y8)) +
r1 ((-1 + r2) y4 y5 - (r2 y3 + y4) y6 + y2 (y3 - 2 r2 y3 + y7 - r2 y7 + y8) + y1 (-y4 + 2 r2 y4 + r2 y8))

y4D = FullSimplify[Series[rec4 - y4 /. recScale, {ε, 0, 1}] /. recBackScale // Normal]

y4 (-1 + y1 + y2 + y3 + y4 + y5 + y6 + y7 + y8) +
r2 (-y4 (y1 + y5 + y7) + y3 (y2 + y6 + y8)) + r1 (-y4 (y1 + y5 + y6) + y2 (y3 + y7 + y8))

Collect[y4D, {r1, r2}]

y4 (-1 + y1 + y2 + y3 + y4 + y5 + y6 + y7 + y8) +
r2 (-y4 (y1 + y5 + y7) + y3 (y2 + y6 + y8)) + r1 (-y4 (y1 + y5 + y6) + y2 (y3 + y7 + y8))

FullSimplify[(y4 (-1 + y1 + y2 + y3 + y4 + y5 + y6 + y7 + y8)),
Assumptions -> {y8 == 1 - y1 - y2 - y3 - y4 - y5 - y6 - y7, y1 + y2 + y3 + y4 + y5 + y6 + y7 + y8 == 1}]
0

```

In[25]:=

```

y4DotRec := -r1 (y4 p - y2 (1 - p)) - r2 (y4 q - y3 (1 - q))

y4DotRec - y4D /. {p -> y1 + y2 + y5 + y6, q -> y1 + y3 + y5 + y7} //.
{y1 -> 1 - (y2 + y3 + y4 + y5 + y6 + y7 + y8)} // Simplify
0

```

The following test term is from an independent derivation of Reinhard Bürger (personal communication).

```

testTerm4 := r2 (-y[4] (y[1] + y[5] + y[7]) + y[3] (y[2] + y[6] + y[8])) +
r1 (-y[4] (y[1] + y[5] + y[6]) + y[2] (y[3] + y[7] + y[8])) /.
{y[1] -> y1, y[2] -> y2, y[3] -> y3, y[4] -> y4, y[5] -> y5, y[6] -> y6, y[7] -> y7, y[8] -> y8}

r2 (-y4 (y1 + y5 + y7) + y3 (y2 + y6 + y8)) +
r1 (-y4 (y1 + y5 + y6) + y2 (y3 + y7 + y8)) - testTerm4 // Simplify
0

rec5 = sumPerOffspringGamete[gametes, 5, recSep] // FullSimplify

y3 y5 - r1 y3 y5 + y4 y5 - r1 y4 y5 - r2 y4 y5 + r1 r2 y4 y5 + y52 +
r2 y3 y6 - r1 r2 y3 y6 + y5 y6 + y5 y7 + r1 y6 y7 + r2 y6 y7 - 2 r1 r2 y6 y7 -
(-1 + r2) y2 (y5 + r1 y7) + (1 - r1 - r2 + 2 r1 r2) y5 y8 + y1 (y5 + r2 y6 + r1 y7 + r1 r2 y8)

```

```

y5D = FullSimplify[Series[rec5 - y5 /. recScale, {e, 0, 1}] /. recBackScale // Normal]

y52 + r1 (y1 + y2 + y6) y7 + r2 y6 (y1 + y3 + y7) +
  y5 (-1 + y1 + y2 - r2 y2 + y3 - r1 y3 + y4 + y6 + y7 + y8 - (r1 + r2) (y4 + y8))
Collect[y5D, {r1, r2}]

-y5 + y1 y5 + y2 y5 + y3 y5 + y4 y5 + y52 + y5 y6 + y5 y7 + y5 y8 +
  r1 (-y3 y5 + (y1 + y2 + y6) y7 - y5 (y4 + y8)) + r2 (-y2 y5 + y6 (y1 + y3 + y7) - y5 (y4 + y8))
FullSimplify[(-y5 + y1 y5 + y2 y5 + y3 y5 + y4 y5 + y52 + y5 y6 + y5 y7 + y5 y8),
  Assumptions → {y8 = 1 - y1 - y2 - y3 - y4 - y5 - y6 - y7, y1 + y2 + y3 + y4 + y5 + y6 + y7 + y8 = 1}]
0

```

In[26]=

```
y5DotRec := -r1 (y5 (1 - p) - y7 p) - r2 (y5 (1 - q) - y6 q)
```

```

y5DotRec - y5D /. {p → y1 + y2 + y5 + y6, q → y1 + y3 + y5 + y7} //.
  {y1 → 1 - (y2 + y3 + y4 + y5 + y6 + y7 + y8)} // Simplify
0

```

The following test term is from an independent derivation of Reinhard Bürger (personal communication).

```

testTerm5 := r2 (y[6] (y[1] + y[3] + y[7]) - y[5] (y[2] + y[4] + y[8])) +
  r1 ((y[1] + y[2] + y[6]) y[7] - y[5] (y[3] + y[4] + y[8])) /.
  {y[1] → y1, y[2] → y2, y[3] → y3, y[4] → y4, y[5] → y5, y[6] → y6, y[7] → y7, y[8] → y8}
r1 (-y3 y5 + (y1 + y2 + y6) y7 - y5 (y4 + y8)) +
  r2 (-y2 y5 + y6 (y1 + y3 + y7) - y5 (y4 + y8)) - testTerm5 // Simplify
0

```

```

rec6 = sumPerOffspringGamete[gametes, 6, recSep] // FullSimplify

y6 (y1 + y2 + y3 - r1 y3 + y4 + y5 + y6 + y7 - r1 (y4 + y7)) + (r1 (y1 + y2 + y5) + y6) y8 +
  r2 (y4 (y5 - r1 y5) - y6 (y1 + y3 - r1 y3 + y7 - 2 r1 y7) + y2 (y5 + r1 y7) + (y5 - r1 (y1 + 2 y5)) y8)
y6D = FullSimplify[Series[rec6 - y6 /. recScale, {e, 0, 1}] /. recBackScale // Normal]

y6 (-1 + y1 + y2 + y3 - r1 y3 + y4 + y5 + y6 + y7 - r1 (y4 + y7)) +
  (r1 (y1 + y2 + y5) + y6) y8 + r2 (-y6 (y1 + y3 + y7) + y5 (y2 + y4 + y8))
Collect[y6D, {r1, r2}]

-y6 + y1 y6 + y2 y6 + y3 y6 + y4 y6 + y5 y6 + y62 + y6 y7 + y6 y8 +
  r1 (-y3 y6 - y6 (y4 + y7) + (y1 + y2 + y5) y8) + r2 (-y6 (y1 + y3 + y7) + y5 (y2 + y4 + y8))
FullSimplify[-y6 + y1 y6 + y2 y6 + y3 y6 + y4 y6 + y5 y6 + y62 + y6 y7 + y6 y8,
  Assumptions → {y8 = 1 - y1 - y2 - y3 - y4 - y5 - y6 - y7, y1 + y2 + y3 + y4 + y5 + y6 + y7 + y8 = 1}]
0

```

In[27]=

```
y6DotRec := -r1 (y6 (1 - p) - y8 p) - r2 (y6 q - y5 (1 - q))
```

```

y6DotRec - y6D /. {p → y1 + y2 + y5 + y6, q → y1 + y3 + y5 + y7} //.
  {y1 → 1 - (y2 + y3 + y4 + y5 + y6 + y7 + y8)} // Simplify
0

```

The following test term is from an independent derivation of Reinhard Bürger (personal communication).

```

testTerm6 := -r1 y[6] (y[3] + y[4] + y[7]) + r1 (y[1] + y[2] + y[5]) y[8] +
  r2 (-y[6] (y[1] + y[3] + y[7]) + y[5] (y[2] + y[4] + y[8])) /.
  {y[1] → y1, y[2] → y2, y[3] → y3, y[4] → y4, y[5] → y5, y[6] → y6, y[7] → y7, y[8] → y8}
r1 (-y3 y6 - y6 (y4 + y7) + (y1 + y2 + y5) y8) +
  r2 (-y6 (y1 + y3 + y7) + y5 (y2 + y4 + y8)) - testTerm6 // Simplify
0

```

```

rec7 = sumPerOffspringGamete[gametes, 7, recSep] // FullSimplify
y7 (y1 + y2 - r2 y2 + y3 + y4 + y5 + y6 - r2 (y4 + y6) + y7) + (r2 (y1 + y3 + y5) + y7) y8 +
  r1 (y4 (y5 - r2 y5) + y3 (y5 + r2 y6) - (y1 + y2 - r2 y2 + y6 - 2 r2 y6) y7 + (y5 - r2 (y1 + 2 y5)) y8)
y7D = FullSimplify[Series[rec7 - y7 /. recScale, {ε, 0, 1}] /. recBackScale // Normal]
y7 (-1 + y1 + y2 - r2 y2 + y3 + y4 + y5 + y6 - r2 (y4 + y6) + y7) +
  (r2 (y1 + y3 + y5) + y7) y8 + r1 (- (y1 + y2 + y6) y7 + y5 (y3 + y4 + y8))
Collect[y7D, {r1, r2}]
-y7 + y1 y7 + y2 y7 + y3 y7 + y4 y7 + y5 y7 + y6 y7 + y72 + y7 y8 +
  r2 (-y2 y7 + (-y4 - y6) y7 + (y1 + y3 + y5) y8) + r1 (- (y1 + y2 + y6) y7 + y5 (y3 + y4 + y8))
FullSimplify[-y7 + y1 y7 + y2 y7 + y3 y7 + y4 y7 + y5 y7 + y6 y7 + y72 + y7 y8,
  Assumptions → {y8 = 1 - y1 - y2 - y3 - y4 - y5 - y6 - y7, y1 + y2 + y3 + y4 + y5 + y6 + y7 + y8 = 1}]
0

```

In[28]=

```
y7DotRec := -r1 (y7 p - y5 (1 - p)) - r2 (y7 (1 - q) - y8 q)
```

```

y7DotRec - y7D /. {p → y1 + y2 + y5 + y6, q → y1 + y3 + y5 + y7} //.
  {y1 → 1 - (y2 + y3 + y4 + y5 + y6 + y7 + y8)} // Simplify
0

```

The following test term is from an independent derivation of Reinhard Bürger (personal communication).

```

testTerm7 := -r2 (y[2] + y[4] + y[6]) y[7] + r2 (y[1] + y[3] + y[5]) y[8] +
  r1 (- (y[1] + y[2] + y[6]) y[7] + y[5] (y[3] + y[4] + y[8])) /.
  {y[1] → y1, y[2] → y2, y[3] → y3, y[4] → y4, y[5] → y5, y[6] → y6, y[7] → y7, y[8] → y8}
r2 (-y2 y7 + (-y4 - y6) y7 + (y1 + y3 + y5) y8) +
  r1 (- (y1 + y2 + y6) y7 + y5 (y3 + y4 + y8)) - testTerm7 // Simplify
0

```

```

rec8 = sumPerOffspringGamete[gametes, 8, recSep] // FullSimplify
r2 (y2 + y4 + y6) y7 - r2 (y1 + y3 + y5) y8 + y8 (y1 + y2 + y3 + y4 + y5 + y6 + y7 + y8) +
  r1 (y6 (y3 + y4 + y7) - (y1 + y2 + y5) y8 + r2 (-y2 y7 - y6 (y3 + 2 y7) + y1 y8 + y5 (y4 + 2 y8)))
y8D = FullSimplify[Series[rec8 - y8 /. recScale, {ε, 0, 1}] /. recBackScale // Normal]
r2 (y2 + y4 + y6) y7 + r1 y6 (y3 + y4 + y7) - r1 (y1 + y2 + y5) y8 -
  r2 (y1 + y3 + y5) y8 + y8 (-1 + y1 + y2 + y3 + y4 + y5 + y6 + y7 + y8)
Collect[y8D, {r1, r2}]
y8 (-1 + y1 + y2 + y3 + y4 + y5 + y6 + y7 + y8) +
  r1 (y6 (y3 + y4 + y7) + (-y1 - y2 - y5) y8) + r2 ((y2 + y4 + y6) y7 + (-y1 - y3 - y5) y8)
FullSimplify[y8 (-1 + y1 + y2 + y3 + y4 + y5 + y6 + y7 + y8),
  Assumptions → {y8 = 1 - y1 - y2 - y3 - y4 - y5 - y6 - y7, y1 + y2 + y3 + y4 + y5 + y6 + y7 + y8 = 1}]
0

```

In[29]=

```
y8DotRec := -r1 (y8 p - y6 (1 - p)) - r2 (y8 q - y7 (1 - q))
```

```

y8DotRec - y8D /. {p → y1 + y2 + y5 + y6, q → y1 + y3 + y5 + y7} //.
  {y1 → 1 - (y2 + y3 + y4 + y5 + y6 + y7 + y8)} // Simplify
0

```

The following test term is from an independent derivation of Reinhard Bürger (personal communication).

```

testTerm8 := r2 (y[2] + y[4] + y[6]) y[7] + r1 y[6] (y[3] + y[4] + y[7]) -
  r1 (y[1] + y[2] + y[5]) y[8] - r2 (y[1] + y[3] + y[5]) y[8] /.
  {y[1] → y1, y[2] → y2, y[3] → y3, y[4] → y4, y[5] → y5, y[6] → y6, y[7] → y7, y[8] → y8}

```

```

r1 (y6 (y3 + y4 + y7) + (-y1 - y2 - y5) y8) +
  r2 ((y2 + y4 + y6) y7 + (-y1 - y3 - y5) y8) - testTerm8 // Simplify
0

```

Some further tests:

```

y1DotRec + y5DotRec // FullSimplify
r2 ((-1 + q) y1 - y5 + q (y2 + y5 + y6)) + r1 ((-1 + p) y1 - y5 + p (y3 + y5 + y7))

```

A bit of algebra confirms that this is equal to  $(r_{AC} + r_{CB})(p q - y_1 - y_5) = -r_{AB} D_{AB}$ , as expected from the marginal two-locus system.

```

y2DotRec + y6DotRec // FullSimplify
-r2 ((-1 + q) y1 - y5 + q (y2 + y5 + y6)) + r1 ((-1 + p) y2 - y6 + p (y4 + y6 + y8))

```

Again, some algebra confirms that this is equal to  $(r_{AC} + r_{CB})(-p q + y_1 + y_5) = r_{AB} D_{AB}$ , as expected from the marginal two-locus system. To see this, note that  $D_{AB}$  can also be defined as  $-(y_2 + y_6) + p(1 - q)$ .

```

y3DotRec + y7DotRec // FullSimplify
-r1 ((-1 + p) y1 - y5 + p (y3 + y5 + y7)) + r2 ((-1 + q) y3 - y7 + q (y4 + y7 + y8))

```

Noting that  $D_{AB}$  can also be defined as  $-(y_3 + y_7) + (1 - p)q$ , one can show that this is equal to  $(r_{AC} + r_{CB})(-p q + y_1 + y_5) = r_{AB} D_{AB}$ , as expected from the marginal two-locus system.

```

y4DotRec + y8DotRec // FullSimplify
-r1 ((-1 + p) y2 - y6 + p (y4 + y6 + y8)) - r2 ((-1 + q) y3 - y7 + q (y4 + y7 + y8))

```

which is equal to  $(r_{AC} + r_{CB})(y_2 + y_6 - p(1 - q)) = -r_{AB} D_{AB}$ , as expected from the marginal two-locus system.

#### ■ In terms of allele frequencies and LD

```

allToGam
{p → y1 + y2 + y5 + y6, q → y1 + y3 + y5 + y7, n → y1 + y2 + y3 + y4}
DACBDefAlt := y1 - (y1 + y2 + y5 + y6) (y1 + y3 + y5 + y7) (y1 + y2 + y3 + y4) -
  (y1 + y2 + y5 + y6) ((y1 + y3) (y6 + y8) - (y2 + y4) (y5 + y7)) -
  (y1 + y3 + y5 + y7) ((y1 + y2) (y7 + y8) - (y5 + y6) (y3 + y4)) -
  (y1 + y2 + y3 + y4) ((y1 + y5) (y4 + y8) - (y2 + y6) (y3 + y7))
DACBDefAlt - DACBDef
0
DACBDef // FullSimplify
y1 - (y1 + y2 + y3 + y4) (y1 + y2 + y5 + y6) (y1 + y3 + y5 + y7) -
  (y1 + y2 + y3 + y4) (- (y2 + y6) (y3 + y7) + (y1 + y5) (y4 + y8)) -
  (y1 + y2 + y5 + y6) (- (y2 + y4) (y5 + y7) + (y1 + y3) (y6 + y8)) -
  (y1 + y3 + y5 + y7) (- (y3 + y4) (y5 + y6) + (y1 + y2) (y7 + y8))
DANB[1] //. {x_[i_, j_] → x[i]} /.
{y[1] → y1, y[2] → y2, y[3] → y3, y[4] → y4, y[5] → y5, y[6] → y6, y[7] → y7, y[8] → y8}
DANB[1]

```

In[30]:=

```

pDotRec := D[pDef /. {y1 → y1[t], y2 → y2[t], y5 → y5[t], y6 → y6[t]}, t] /.
  {y1'[t] → y1DotRec, y2'[t] → y2DotRec, y5'[t] → y5DotRec, y6'[t] → y6DotRec} /.
  gamToAllLD // FullSimplify
qDotRec := D[qDef /. {y1 → y1[t], y3 → y3[t], y5 → y5[t], y7 → y7[t]}, t] /.
  {y1'[t] → y1DotRec, y3'[t] → y3DotRec, y5'[t] → y5DotRec, y7'[t] → y7DotRec} /.
  gamToAllLD // FullSimplify
nDotRec := D[nDef /. {y1 → y1[t], y2 → y2[t], y3 → y3[t], y4 → y4[t]}, t] /.
  {y1'[t] → y1DotRec, y2'[t] → y2DotRec, y3'[t] → y3DotRec, y4'[t] → y4DotRec} /.
  gamToAllLD // FullSimplify
DACDotRec := D[DACDef /. {y1 → y1[t], y2 → y2[t], y3 → y3[t],
  y4 → y4[t], y5 → y5[t], y6 → y6[t], y7 → y7[t], y8 → y8[t]}, t] /.
  {y1'[t] → y1DotRec, y2'[t] → y2DotRec, y3'[t] → y3DotRec, y4'[t] → y4DotRec,
  y5'[t] → y5DotRec, y6'[t] → y6DotRec, y7'[t] → y7DotRec, y8'[t] → y8DotRec} /.
  {x_[t] → x} /. gamToAllLD // FullSimplify
DCBDotRec := D[DCBDef /. {y1 → y1[t], y2 → y2[t], y3 → y3[t], y4 → y4[t],
  y5 → y5[t], y6 → y6[t], y7 → y7[t], y8 → y8[t]}, t] /.
  {y1'[t] → y1DotRec, y2'[t] → y2DotRec, y3'[t] → y3DotRec, y4'[t] → y4DotRec,
  y5'[t] → y5DotRec, y6'[t] → y6DotRec, y7'[t] → y7DotRec, y8'[t] → y8DotRec} /.
  {x_[t] → x} /. gamToAllLD // FullSimplify
DABDotRec := D[DABDef /. {y1 → y1[t], y2 → y2[t], y3 → y3[t], y4 → y4[t],
  y5 → y5[t], y6 → y6[t], y7 → y7[t], y8 → y8[t]}, t] /.
  {y1'[t] → y1DotRec, y2'[t] → y2DotRec, y3'[t] → y3DotRec, y4'[t] → y4DotRec,
  y5'[t] → y5DotRec, y6'[t] → y6DotRec, y7'[t] → y7DotRec, y8'[t] → y8DotRec} /.
  {x_[t] → x} /. gamToAllLD // FullSimplify
DACBDotRec := D[DACBDef /. {y1 → y1[t], y2 → y2[t], y3 → y3[t],
  y4 → y4[t], y5 → y5[t], y6 → y6[t], y7 → y7[t], y8 → y8[t]}, t] /.
  {y1'[t] → y1DotRec, y2'[t] → y2DotRec, y3'[t] → y3DotRec, y4'[t] → y4DotRec,
  y5'[t] → y5DotRec, y6'[t] → y6DotRec, y7'[t] → y7DotRec, y8'[t] → y8DotRec} /.
  {x_[t] → x} /. gamToAllLD // FullSimplify

```

```
{pDotRec, qDotRec, nDotRec, DACDotRec, DCBDotRec, DABDotRec, DACBDotRec} // TableForm
```

0

0

0

-DAC r1

-DCB r2

-DAB (r1 + r2)

-DACB (r1 + r2)

An independently derived test term (Reinhard Bürger, personal communication):

```

testTerm := y1 - (y1 + y2 + y3 + y4) (y1 + y2 + y5 + y6) (y1 + y3 + y5 + y7) -
  (y1 + y2 + y3 + y4) (- (y2 + y6) (y3 + y7) + (y1 + y5) (y4 + y8)) -
  (y1 + y2 + y5 + y6) (- (y2 + y4) (y5 + y7) + (y1 + y3) (y6 + y8)) -
  (y1 + y3 + y5 + y7) (- (y3 + y4) (y5 + y6) + (y1 + y2) (y7 + y8))

```

```
DACBDef - testTerm // FullSimplify
```

0

```
testTerm
```

```

y1 - (y1 + y2 + y3 + y4) (y1 + y2 + y5 + y6) (y1 + y3 + y5 + y7) -
  (y1 + y2 + y3 + y4) ((-y2 - y6) (y3 + y7) + (y1 + y5) (y4 + y8)) -
  (y1 + y2 + y5 + y6) ((-y2 - y4) (y5 + y7) + (y1 + y3) (y6 + y8)) -
  (y1 + y3 + y5 + y7) ((-y3 - y4) (y5 + y6) + (y1 + y2) (y7 + y8))

```

```
In[37]:= DACBRule := y1 - p q n - p (y1 + y3 - q n) - q (y1 + y2 - p n) - n (y1 + y5 - p q)
```



- Differential equations under migration

- In terms of gamete frequencies

In[38]=

```

y1DotMig := -m y1
y2DotMig := -m y2
y3DotMig := -m y3
y4DotMig := m (nC - y4)
y5DotMig := -m y5
y6DotMig := -m y6
y7DotMig := -m y7
y8DotMig := m (1 - nC - y8)

```

```

FullSimplify[y1DotMig + y2DotMig + y3DotMig + y4DotMig + y5DotMig + y6DotMig +
y7DotMig + y8DotMig, Assumptions → {y1 + y2 + y3 + y4 + y5 + y6 + y7 + y8 == 1}]

```

0

```

FullSimplify[y1DotMig + y5DotMig /. {y2 + y4 + y6 + y8 → x2 + x4} /.
{y3 + y4 + y7 + y8 → x3 + x4}] /. {y1 + y5 → x1}

```

-m x1

```

FullSimplify[y2DotMig + y6DotMig /. {y1 + y3 + y5 + y7 → x1 + x3, y3 + y4 + y7 + y8 → x3 + x4}] /.
{y2 + y6 → x2}

```

-m x2

```

FullSimplify[y3DotMig + y7DotMig /. {y1 + y2 + y5 + y6 → x1 + x2, y2 + y4 + y6 + y8 → x2 + x4}] /.
{y3 + y7 → x3}

```

-m x3

```

FullSimplify[y4DotMig + y8DotMig /. {y1 + y2 + y5 + y6 → x1 + x2, y1 + y3 + y5 + y7 → x1 + x3}] /.
{y4 + y8 → x4}

```

-m (-1 + x4)

- In terms of allele frequencies and LD

allToGam

```

{p → y1 + y2 + y5 + y6, q → y1 + y3 + y5 + y7, n → y1 + y2 + y3 + y4}

```

In[46]:=

```

pDotMig := D[pDef /. {y1 → y1[t], y2 → y2[t], y5 → y5[t], y6 → y6[t]}, t] /.
  {y1'[t] → y1DotMig, y2'[t] → y2DotMig, y5'[t] → y5DotMig, y6'[t] → y6DotMig} /.
  gamToAllLD // FullSimplify
qDotMig := D[qDef /. {y1 → y1[t], y3 → y3[t], y5 → y5[t], y7 → y7[t]}, t] /.
  {y1'[t] → y1DotMig, y3'[t] → y3DotMig, y5'[t] → y5DotMig, y7'[t] → y7DotMig} /.
  gamToAllLD // FullSimplify
nDotMig := D[nDef /. {y1 → y1[t], y2 → y2[t], y3 → y3[t], y4 → y4[t]}, t] /.
  {y1'[t] → y1DotMig, y2'[t] → y2DotMig, y3'[t] → y3DotMig, y4'[t] → y4DotMig} /.
  gamToAllLD // FullSimplify
DACDotMig := D[DACDef /. {y1 → y1[t], y2 → y2[t], y3 → y3[t],
  y4 → y4[t], y5 → y5[t], y6 → y6[t], y7 → y7[t], y8 → y8[t]}, t] /.
  {y1'[t] → y1DotMig, y2'[t] → y2DotMig, y3'[t] → y3DotMig, y4'[t] → y4DotMig,
  y5'[t] → y5DotMig, y6'[t] → y6DotMig, y7'[t] → y7DotMig, y8'[t] → y8DotMig} /.
  {x_[t] → x} /. gamToAllLD // FullSimplify
DCBDotMig := D[DCBDef /. {y1 → y1[t], y2 → y2[t], y3 → y3[t], y4 → y4[t],
  y5 → y5[t], y6 → y6[t], y7 → y7[t], y8 → y8[t]}, t] /.
  {y1'[t] → y1DotMig, y2'[t] → y2DotMig, y3'[t] → y3DotMig, y4'[t] → y4DotMig,
  y5'[t] → y5DotMig, y6'[t] → y6DotMig, y7'[t] → y7DotMig, y8'[t] → y8DotMig} /.
  {x_[t] → x} /. gamToAllLD // FullSimplify
DABDotMig := D[DABDef /. {y1 → y1[t], y2 → y2[t], y3 → y3[t], y4 → y4[t],
  y5 → y5[t], y6 → y6[t], y7 → y7[t], y8 → y8[t]}, t] /.
  {y1'[t] → y1DotMig, y2'[t] → y2DotMig, y3'[t] → y3DotMig, y4'[t] → y4DotMig,
  y5'[t] → y5DotMig, y6'[t] → y6DotMig, y7'[t] → y7DotMig, y8'[t] → y8DotMig} /.
  {x_[t] → x} /. gamToAllLD // FullSimplify
DACBDotMig := D[DACBDef /. {y1 → y1[t], y2 → y2[t], y3 → y3[t],
  y4 → y4[t], y5 → y5[t], y6 → y6[t], y7 → y7[t], y8 → y8[t]}, t] /.
  {y1'[t] → y1DotMig, y2'[t] → y2DotMig, y3'[t] → y3DotMig, y4'[t] → y4DotMig,
  y5'[t] → y5DotMig, y6'[t] → y6DotMig, y7'[t] → y7DotMig, y8'[t] → y8DotMig} /.
  {x_[t] → x} /. gamToAllLD // FullSimplify

```

Test of the pattern rule  $x_{[t]} \rightarrow x$ :

```

D[DACBDef /. {y1 → y1[t], y2 → y2[t], y3 → y3[t],
  y4 → y4[t], y5 → y5[t], y6 → y6[t], y7 → y7[t], y8 → y8[t]}, t] /.
  {y1'[t] → y1DotMig, y2'[t] → y2DotMig, y3'[t] → y3DotMig, y4'[t] → y4DotMig,
  y5'[t] → y5DotMig, y6'[t] → y6DotMig, y7'[t] → y7DotMig, y8'[t] → y8DotMig} /.
  ruleRemoveDummy /. gamToAllLD // FullSimplify
m (-DACB + DCB p + DAC q + (n - nC) (DAB - p q))
%- DACBDotMig // FullSimplify
0

```

In[53]:=

```

ruleRemoveDummy := {y1[t] → y1, y2[t] → y2, y3[t] → y3,
  y4[t] → y4, y5[t] → y5, y6[t] → y6, y7[t] → y7, y8[t] → y8}
{pDotMig, qDotMig, nDotMig, DACDotMig, DCBDotMig, DABDotMig, DACBDotMig} // TableForm
-m p
-m q
m (-n + nC)
-m (DAC + (-n + nC) p)
-m (DCB + (-n + nC) q)
-DAB m + m p q
m (-DACB + DCB p + DAC q + (n - nC) (DAB - p q))

```

- Differential equations under selection

- In terms of gamete frequencies

In[54]:=

```

y1DotSel := y1 (a (y3 + y4 + y7 + y8) + b (y2 + y4 + y6 + y8))
y2DotSel := y2 (a (y3 + y4 + y7 + y8) - b (y1 + y3 + y5 + y7))
y3DotSel := y3 (-a (y1 + y2 + y5 + y6) + b (y2 + y4 + y6 + y8))
y4DotSel := y4 (-a (y1 + y2 + y5 + y6) - b (y1 + y3 + y5 + y7))

y5DotSel := y5 (a (y3 + y4 + y7 + y8) + b (y2 + y4 + y6 + y8))
y6DotSel := y6 (a (y3 + y4 + y7 + y8) - b (y1 + y3 + y5 + y7))
y7DotSel := y7 (-a (y1 + y2 + y5 + y6) + b (y2 + y4 + y6 + y8))
y8DotSel := y8 (-a (y1 + y2 + y5 + y6) - b (y1 + y3 + y5 + y7))

```

```

FullSimplify[y1DotSel + y5DotSel /. {y2 + y4 + y6 + y8 → x2 + x4} /.
  {y3 + y4 + y7 + y8 → x3 + x4}] /. {y1 + y5 → x1}

```

```
x1 (b (x2 + x4) + a (x3 + x4))
```

```

FullSimplify[y2DotSel + y6DotSel /. {y1 + y3 + y5 + y7 → x1 + x3, y3 + y4 + y7 + y8 → x3 + x4}] /.
  {y2 + y6 → x2}

```

```
x2 (-b (x1 + x3) + a (x3 + x4))
```

```

FullSimplify[y3DotSel + y7DotSel /. {y1 + y2 + y5 + y6 → x1 + x2, y2 + y4 + y6 + y8 → x2 + x4}] /.
  {y3 + y7 → x3}

```

```
x3 (-a (x1 + x2) + b (x2 + x4))
```

```

FullSimplify[y4DotSel + y8DotSel /. {y1 + y2 + y5 + y6 → x1 + x2, y1 + y3 + y5 + y7 → x1 + x3}] /.
  {y4 + y8 → x4}

```

```
- (a (x1 + x2) + b (x1 + x3)) x4
```

- In terms of allele frequencies and LD

**allToGam**

```
{p → y1 + y2 + y5 + y6, q → y1 + y3 + y5 + y7, n → y1 + y2 + y3 + y4}
```

In[62]:=

```

pDotSel := D[pDef /. {y1 → y1[t], y2 → y2[t], y5 → y5[t], y6 → y6[t]}, t] /.
  {y1'[t] → y1DotSel, y2'[t] → y2DotSel, y5'[t] → y5DotSel, y6'[t] → y6DotSel} /.
  gamToAllLD // FullSimplify
qDotSel := D[qDef /. {y1 → y1[t], y3 → y3[t], y5 → y5[t], y7 → y7[t]}, t] /.
  {y1'[t] → y1DotSel, y3'[t] → y3DotSel, y5'[t] → y5DotSel, y7'[t] → y7DotSel} /.
  gamToAllLD // FullSimplify
nDotSel := D[nDef /. {y1 → y1[t], y2 → y2[t], y3 → y3[t], y4 → y4[t]}, t] /.
  {y1'[t] → y1DotSel, y2'[t] → y2DotSel, y3'[t] → y3DotSel, y4'[t] → y4DotSel} /.
  gamToAllLD // FullSimplify
DACDotSel := D[DACDef /. {y1 → y1[t], y2 → y2[t], y3 → y3[t],
  y4 → y4[t], y5 → y5[t], y6 → y6[t], y7 → y7[t], y8 → y8[t]}, t] /.
  {y1'[t] → y1DotSel, y2'[t] → y2DotSel, y3'[t] → y3DotSel, y4'[t] → y4DotSel,
  y5'[t] → y5DotSel, y6'[t] → y6DotSel, y7'[t] → y7DotSel, y8'[t] → y8DotSel} /.
  {x_[t] → x} /. gamToAllLD // FullSimplify
DCBDotSel := D[DCBDef /. {y1 → y1[t], y2 → y2[t], y3 → y3[t], y4 → y4[t],
  y5 → y5[t], y6 → y6[t], y7 → y7[t], y8 → y8[t]}, t] /.
  {y1'[t] → y1DotSel, y2'[t] → y2DotSel, y3'[t] → y3DotSel, y4'[t] → y4DotSel,
  y5'[t] → y5DotSel, y6'[t] → y6DotSel, y7'[t] → y7DotSel, y8'[t] → y8DotSel} /.
  {x_[t] → x} /. gamToAllLD // FullSimplify
DABDotSel := D[DABDef /. {y1 → y1[t], y2 → y2[t], y3 → y3[t], y4 → y4[t],
  y5 → y5[t], y6 → y6[t], y7 → y7[t], y8 → y8[t]}, t] /.
  {y1'[t] → y1DotSel, y2'[t] → y2DotSel, y3'[t] → y3DotSel, y4'[t] → y4DotSel,
  y5'[t] → y5DotSel, y6'[t] → y6DotSel, y7'[t] → y7DotSel, y8'[t] → y8DotSel} /.
  {x_[t] → x} /. gamToAllLD // FullSimplify
DACBDotSel := D[DACBDef /. {y1 → y1[t], y2 → y2[t], y3 → y3[t],
  y4 → y4[t], y5 → y5[t], y6 → y6[t], y7 → y7[t], y8 → y8[t]}, t] /.
  {y1'[t] → y1DotSel, y2'[t] → y2DotSel, y3'[t] → y3DotSel, y4'[t] → y4DotSel,
  y5'[t] → y5DotSel, y6'[t] → y6DotSel, y7'[t] → y7DotSel, y8'[t] → y8DotSel} /.
  {x_[t] → x} /. gamToAllLD // FullSimplify

```

```
{pDotSel, qDotSel, nDotSel, DACDotSel, DCBDotSel, DABDotSel, DACBDotSel} // TableForm
```

```

b DAB - a (-1 + p) p
a DAB - b (-1 + q) q
a DAC + b DCB
b DACB + a (DAC - 2 DAC p)
a DACB + b DCB (1 - 2 q)
DAB (a + b - 2 a p - 2 b q)
a (-2 DAB DAC + DACB - 2 DACB p) + b (DACB - 2 DAB DCB - 2 DACB q)

```

## ■ Differential equations under selection, migration and recombination

### ■ Remark

As we are assuming continuous-time dynamics, interactions of selection, migration and recombinations are ignored and the order of the processes is irrelevant. Therefore, the overall differential equations are obtained by adding those for the single processes.

### ■ In terms of gamete frequencies

In[69]:=

```

y1Dot := y1DotSel + y1DotMig + y1DotRec
y2Dot := y2DotSel + y2DotMig + y2DotRec
y3Dot := y3DotSel + y3DotMig + y3DotRec
y4Dot := y4DotSel + y4DotMig + y4DotRec

y5Dot := y5DotSel + y5DotMig + y5DotRec
y6Dot := y6DotSel + y6DotMig + y6DotRec
y7Dot := y7DotSel + y7DotMig + y7DotRec
y8Dot := y8DotSel + y8DotMig + y8DotRec

```

```
Simplify[y4DotSel + y4DotMig]
```

```
m (nC - y4) - y4 (a (y1 + y2 + y5 + y6) + b (y1 + y3 + y5 + y7))
```

```

{y1Dot, y2Dot, y3Dot, y4Dot, y5Dot, y6Dot, y7Dot, y8Dot} // Simplify // TableForm

-m y1 + r2 ((-1 + q) y1 + q y2) + r1 ((-1 + p) y1 + p y3) + y1 (b (y2 + y4 + y6 + y8) + a (y3 + y4 + y7 + y8)
-m y2 - r2 ((-1 + q) y1 + q y2) + r1 ((-1 + p) y2 + p y4) + y2 (-b (y1 + y3 + y5 + y7) + a (y3 + y4 + y7 + y8)
-m y3 - r1 ((-1 + p) y1 + p y3) + r2 ((-1 + q) y3 + q y4) + y3 (-a (y1 + y2 + y5 + y6) + b (y2 + y4 + y6 + y8)
m (nC - y4) - r1 ((-1 + p) y2 + p y4) - r2 ((-1 + q) y3 + q y4) + y4 (-a (y1 + y2 + y5 + y6) - b (y1 + y3 + y
-m y5 + r2 ((-1 + q) y5 + q y6) + r1 ((-1 + p) y5 + p y7) + y5 (b (y2 + y4 + y6 + y8) + a (y3 + y4 + y7 + y8)
-m y6 - r2 ((-1 + q) y5 + q y6) + r1 ((-1 + p) y6 + p y8) + y6 (-b (y1 + y3 + y5 + y7) + a (y3 + y4 + y7 + y8)
-m y7 - r1 ((-1 + p) y5 + p y7) + r2 ((-1 + q) y7 + q y8) + y7 (-a (y1 + y2 + y5 + y6) + b (y2 + y4 + y6 + y8)
(-a (y1 + y2 + y5 + y6) - b (y1 + y3 + y5 + y7)) y8 - m (-1 + nC + y8) - r1 ((-1 + p) y6 + p y8) - r2 ((-1 +
Map[Collect[#, {m, r1, r2}] &,
  {y1Dot, y2Dot, y3Dot, y4Dot, y5Dot, y6Dot, y7Dot, y8Dot}] // TableForm

-m y1 + r2 (- (1 - q) y1 + q y2) + r1 (- (1 - p) y1 + p y3) + y1 (b (y2 + y4 + y6 + y8) + a (y3 + y4 + y7 + y8)
-m y2 + r2 ((1 - q) y1 - q y2) + r1 (- (1 - p) y2 + p y4) + y2 (-b (y1 + y3 + y5 + y7) + a (y3 + y4 + y7 + y8)
-m y3 + r1 ((1 - p) y1 - p y3) + r2 (- (1 - q) y3 + q y4) + y3 (-a (y1 + y2 + y5 + y6) + b (y2 + y4 + y6 + y8)
m (nC - y4) + r1 ((1 - p) y2 - p y4) + r2 ((1 - q) y3 - q y4) + y4 (-a (y1 + y2 + y5 + y6) - b (y1 + y3 + y5 +
-m y5 + r2 (- (1 - q) y5 + q y6) + r1 (- (1 - p) y5 + p y7) + y5 (b (y2 + y4 + y6 + y8) + a (y3 + y4 + y7 + y8)
-m y6 + r2 ((1 - q) y5 - q y6) + r1 (- (1 - p) y6 + p y8) + y6 (-b (y1 + y3 + y5 + y7) + a (y3 + y4 + y7 + y8)
-m y7 + r1 ((1 - p) y5 - p y7) + r2 (- (1 - q) y7 + q y8) + y7 (-a (y1 + y2 + y5 + y6) + b (y2 + y4 + y6 + y8)
m (1 - nC - y8) + (-a (y1 + y2 + y5 + y6) - b (y1 + y3 + y5 + y7)) y8 + r1 ((1 - p) y6 - p y8) + r2 ((1 - q) y

```

#### ■ In terms of allele frequencies and LD

**nDotMig**

m (-n + nC)

**nDotSel**

a DAC + b DCB

In[77]:=

```

pDot := pDotSel + pDotMig + pDotRec
qDot := qDotSel + qDotMig + qDotRec
nDot := nDotSel + nDotMig + nDotRec
DACDot := DACDotSel + DACDotMig + DACDotRec
DCBDot := DCBDotSel + DCBDotMig + DCBDotRec
DABDot := DABDotSel + DABDotMig + DABDotRec
DACBDot := DACBDotSel + DACBDotMig + DACBDotRec

```

```

{pDot, qDot, nDot, DACDot, DCBDot, DABDot, DACBDot} // Simplify // TableForm

```

```

b DAB - (m + a (-1 + p)) p
a DAB - (m + b (-1 + q)) q
a DAC + b DCB + m (-n + nC)
b DACB + a (DAC - 2 DAC p) - m (DAC + (-n + nC) p) - DAC r1
a DACB + b DCB (1 - 2 q) - m (DCB + (-n + nC) q) - DCB r2
-DAB m + m p q + DAB (a + b - 2 a p - 2 b q) - DAB (r1 + r2)
a (-2 DAB DAC + DACB - 2 DACB p) + b (DACB - 2 DAB DCB - 2 DACB q) + m (-DACB + DCB p + DAC q + (n - nC) (I
Collect[DACBDot, {DAB, DAC, DCB, DACB}]

DAB (-2 a DAC - 2 b DCB + m (n - nC)) + DCB m p +
  DAC m q - m (n - nC) p q + DACB (a + b - m - 2 a p - 2 b q - r1 - r2)
FullSimplify[(a + b - m - 2 a p - 2 b q - r1 - r2)]

a + b - m - 2 a p - 2 b q - r1 - r2

```

```

Map[Collect[#, {m, r1, r2}] &,
  {pDot, qDot, nDot, DACDot, DCBDot, DABDot, DACBDot}] // TableForm

b DAB - m p - a (-1 + p) p
a DAB - m q - b (-1 + q) q
a DAC + b DCB + m (-n + nC)
b DACB + a (DAC - 2 DAC p) + m (-DAC - (-n + nC) p) - DAC r1
a DACB + b DCB (1 - 2 q) + m (-DCB - (-n + nC) q) - DCB r2
DAB (a + b - 2 a p - 2 b q) + m (-DAB + p q) - DAB r1 - DAB r2
a (-2 DAB DAC + DACB - 2 DACB p) + b (DACB - 2 DAB DCB - 2 DACB q) + m (-DACB + DCB p + DAC q + (n - nC) (I

```

These are the differential equations given by BA2011 for  $n$ ,  $D_{AC}$ ,  $D_{CB}$  and  $D_{ACB}$ , which are obviously different from those just above.

```

In[84]:= nDotTarget := m ((nC - n) (p + q - p q) - DAC (1 - q) - DCB (1 - p) + DACB) + a DAC + b DCB
DACDotTarget := - (r1 + m (1 - p + p q) - a (1 - 2 p)) DAC +
  m p (1 - p) DCB + m (nC - n) p DAB + (b - m p) DACB + m (nC - n) p (p + q - p q)
DCBDotTarget := - (r2 + m (1 - q + p q) - b (1 - 2 q)) DCB + m q (1 - q) DAC +
  m (nC - n) q DAB + (a - m q) DACB + m (nC - n) q (p + q - p q)
DACBDotTarget := m p q (nC - n) (p + q - p q) + m q (1 - (1 - q) p) DAC + m p (1 - (1 - p) q) DCB -
  m (nC - n) (p + q) DAB - (r1 + r2 + m (1 - p q) - a (1 - 2 p) - b (1 - 2 q)) DACB +
  m (nC - n) DAB^2 + (m (1 - q) - 2 a) DAB DAC + (m (1 - p) - 2 b) DAB DCB - m DAB DACB

```

## Internal equilibrium

### ■ Coordinates

We recall the differential equations:

```

In[88]:= diffEqs =
  Map[Collect[#, {m, r1, r2}] &, {pDot, qDot, DABDot, nDot, DACDot, DCBDot, DACBDot}];
diffEqs // TableForm

```

Out[89]/TableForm=

```

b DAB - m p - a (-1 + p) p
a DAB - m q - b (-1 + q) q
DAB (a + b - 2 a p - 2 b q) + m (-DAB + p q) - DAB r1 - DAB r2
a DAC + b DCB + m (-n + nC)
b DACB + a (DAC - 2 DAC p) + m (-DAC - (-n + nC) p) - DAC r1
a DACB + b DCB (1 - 2 q) + m (-DCB - (-n + nC) q) - DCB r2
a (-2 DAB DAC + DACB - 2 DACB p) + b (DACB - 2 DAB DCB - 2 DACB q) + m (-DACB + DCB p + DAC q + (n - nC) (I

```

```

In[90]:= diffEqsTarget = Map[Collect[#, {m, r1, r2}] &,
  {pDot, qDot, DABDot, nDotTarget, DACDotTarget, DCBDotTarget, DACBDotTarget}];
diffEqsTarget // TableForm

```

Out[91]/TableForm=

```

b DAB - m p - a (-1 + p) p
a DAB - m q - b (-1 + q) q
DAB (a + b - 2 a p - 2 b q) + m (-DAB + p q) - DAB r1 - DAB r2
a DAC + b DCB + m (DACB - DCB (1 - p) - DAC (1 - q) + (-n + nC) (p + q - p q))
b DACB + a DAC (1 - 2 p) + m (-DACB p + DAB (-n + nC) p + DCB (1 - p) p + (-n + nC) p (p + q - p q) - DAC (1 -
a DACB + b DCB (1 - 2 q) + m (-DACB q + DAB (-n + nC) q + DAC (1 - q) q + (-n + nC) q (p + q - p q) - DCB (1 -
- 2 a DAB DAC - 2 b DAB DCB + a DACB (1 - 2 p) + b DACB (1 - 2 q) + m (-DAB DACB + DAB^2 (-n + nC) + DAB DCB

```

For testing purposes, we introduce equations independently derived by Reinhard Bürger (Mathematica Notebook 'Three\_Loci\_gen1.nb', personal communication):

```

In[92]:= testEqs := {-(1 + p) p α + DAB β - p μ, DAB α - (-1 + q) q β - q μ,
  -DAB r1 - DAB r2 + DAB (1 - 2 p) α + DAB (1 - 2 q) β - DAB μ + p q μ,
  DAN α + DNB β + (-n + nC) μ, -DAN r1 + DAN (1 - 2 p) α + DAN β + (-DAN + (n - nC) p) μ,
  -DNB r2 + DANB α + (DNB - 2 DNB q) β - DNB μ + n q μ - nC q μ,
  -DANB r1 - DANB r2 + (-2 DAB DAN + DANB - 2 DANB p) α + (DANB - 2 DAB DNB - 2 DANB q) β -
  DANB μ + DAB n μ - DAB nC μ + DNB p μ + DAN q μ - n p q μ + nC p q μ} /.
  {α → a, β → b, μ → m, DANB → DACB, DAN → DAC, DNB → DCB}

diffEqs - testEqs // FullSimplify

{0, 0, 0, 0, 0, 0, 0}

```

which confirms the equations.

BA2011 (eq. 3.15) showed the coordinates of the internal stable equilibrium to be

$$\begin{aligned} \text{In[93]:= } R1 &:= \sqrt{(a+b+r)^2 - 8m(r1+r2)} \\ \text{In[94]:= } pEqBA &:= \frac{1}{8ar} (b^2 - a^2 + 6ar - r^2 - 4mr + (a-b+r)R1) /. \{r \rightarrow r1+r2\} \\ qEqBA &:= \frac{1}{8br} (a^2 - b^2 + 6br - r^2 - 4mr + (b-a+r)R1) /. \{r \rightarrow r1+r2\} \\ DABEqBA &:= \frac{1}{32abr^2} ((a-b-r)(a+b-r)(a-b+r)((a+b+r)-R1) - \\ &\quad 4mr(a^2+b^2+r^2-2ab-2ar-2br) - 8m^2r^2) /. \{r \rightarrow r1+r2\} \\ nEqBA &:= nC \\ DACEqBA &:= 0 \\ DCBEqBA &:= 0 \\ DACBEqBA &:= 0 \end{aligned}$$

We have used the assumption that higher-order recombination terms can be ignored, and therefore  $r = r_1 + r_2$ .

```
In[101]:= ruleApplyEq := {p -> pEqBA, q -> qEqBA, n -> nEqBA,
  DAB -> DABEqBA, DAC -> DACEqBA, DCB -> DCBEqBA, DACB -> DACBEqBA}
```

We have

```
diffEqs /. ruleApplyEq // FullSimplify
{0, 0, 0, 0, 0, 0, 0, 0}
```

which confirms that this is indeed an equilibrium. We omit the proof that this equilibrium is asymptotically stable (cf. Bürger and Akerman 2011). Instead, we directly proceed to the computation of the Jacobian matrix.

```
diffEqsTarget /. ruleApplyEq // FullSimplify
{0, 0, 0, 0, 0, 0, 0, 0}
```

The equations of BA2011 obviously also represent an equilibrium.

## ■ Jacobian matrix and effective migration rate

### ■ Generic

```
In[102]:= J := Map[Table[D[#, {i}], {i, {p, q, DAB, n, DAC, DCB, DACB}}] &, diffEqs]
J // MatrixForm
```

```
Out[103]//MatrixForm=
(
  -m - a (-1 + p) - a p      0      b
      0      -m - b (-1 + q) - b q      a
  -2 a DAB + m q      -2 b DAB + m p      a + b - m - 2 a p - 2 b q - r1 - r2
      0      0      0
  -2 a DAC + m (n - nC)      0      0
      0      -2 b DCB + m (n - nC)      0
  -2 a DACB + m (DCB - (n - nC) q)  -2 b DACB + m (DAC - (n - nC) p)  -2 a DAC - 2 b DCB + m (n - nC)  m (D
```

As an intermediate step, we set  $n$ ,  $D_{AC}$ ,  $D_{CB}$ , and  $D_{ACB}$  to their equilibrium values  $n_c$ , 0, 0, and 0, respectively.

```
In[104]:= JPrep = J /. {n -> nC, DAC -> 0, DCB -> 0, DACB -> 0} // FullSimplify;
JPrep // MatrixForm
```

```
Out[105]//MatrixForm=
(
  a - m - 2 a p      0      b      0      0      0
      0      b - m - 2 b q      a      0      0      0
  -2 a DAB + m q  -2 b DAB + m p  a + b - m - 2 a p - 2 b q - r1 - r2  0      0      0
      0      0      0      -m      a      b
      0      0      0      m p      a - m - 2 a p - r1      0
      0      0      0      m q      0      b - m - 2 b q
      0      0      0      m (DAB - p q)  -2 a DAB + m q  -2 b DA
```

Now we plug in the equilibrium coordinates into the generic matrix of first-order partial derivatives:

**ruleApplyEq**

$$\left\{ p \rightarrow \frac{1}{8 a (r1+r2)} \left( -a^2 + b^2 + 6 a (r1+r2) - 4 m (r1+r2) - (r1+r2)^2 + (a-b+r1+r2) \sqrt{-8 m (r1+r2) + (a+b+r1+r2)^2} \right), \right.$$

$$q \rightarrow \frac{1}{8 b (r1+r2)} \left( a^2 - b^2 + 6 b (r1+r2) - 4 m (r1+r2) - (r1+r2)^2 + (-a+b+r1+r2) \sqrt{-8 m (r1+r2) + (a+b+r1+r2)^2} \right), n \rightarrow nC, DAB \rightarrow \frac{1}{32 a b (r1+r2)^2}$$

$$\left( -8 m^2 (r1+r2)^2 - 4 m (r1+r2) (a^2 - 2 a b + b^2 - 2 a (r1+r2) - 2 b (r1+r2) + (r1+r2)^2) + (a-b-r1-r2) (a+b-r1-r2) (a-b+r1+r2) \left( a+b+r1+r2 - \sqrt{-8 m (r1+r2) + (a+b+r1+r2)^2} \right) \right), DAC \rightarrow 0, DCB \rightarrow 0, DACB \rightarrow 0 \left. \right\}$$

In[106]:= **JEqGeneric = JPrep /. ruleApplyEq // FullSimplify;**  
**JEqGeneric // MatrixForm**

Out[107]//MatrixForm=

$$\begin{pmatrix} a - m - \frac{-a^2+b^2+6 a (r1+r2)-4 m (r1+r2)-(r1+r2)^2+(a-b+r1+r2) \sqrt{-8 m (r1+r2)+(a+b+r1+r2)^2}}{4 (r1+r2)} & 0 & 0 & 0 & 0 & 0 \\ \frac{8 m^2 (r1+r2)^2+4 m (r1+r2) (a^2+(-b+r1+r2)^2-2 a (b+r1+r2))-(a-b-r1-r2) (a+b-r1-r2) (a-b+r1+r2) \left( a+b+r1+r2-\sqrt{-8 m (r1+r2)+(a+b+r1+r2)^2} \right)}{16 b (r1+r2)^2} & 0 & 0 & 0 & 0 & 0 \end{pmatrix}$$

**JEqGeneric[[4 ;; 7, 4 ;; 7]] // MatrixForm**

$$\begin{pmatrix} m \left( \frac{-a^2+b^2+6 a (r1+r2)-4 m (r1+r2)-(r1+r2)^2+(a-b+r1+r2) \sqrt{-8 m (r1+r2)+(a+b+r1+r2)^2}}{4 (r1+r2)} \right) & 0 & 0 & 0 & 0 & 0 \\ m \left( \frac{a^2-b^2+6 b (r1+r2)-4 m (r1+r2)-(r1+r2)^2+(-a+b+r1+r2) \sqrt{-8 m (r1+r2)+(a+b+r1+r2)^2}}{8 b (r1+r2)} \right) & 0 & 0 & 0 & 0 & 0 \\ m \left( \frac{-a^2+b^2+6 a (r1+r2)-4 m (r1+r2)-(r1+r2)^2+(a-b+r1+r2) \sqrt{-8 m (r1+r2)+(a+b+r1+r2)^2}}{4 (r1+r2)} \right) & \left( a^2-b^2+6 b (r1+r2)-4 m (r1+r2)-(r1+r2)^2+(-a+b+r1+r2) \sqrt{-8 m (r1+r2)+(a+b+r1+r2)^2} \right) & 0 & 0 & 0 & 0 \end{pmatrix}$$



**JEqGeneric[[4 ;; 7, 4 ;; 7]]**

$$\begin{aligned}
& \left\{ \{-m, a, b, 0\}, \left\{ \frac{1}{8 a (r1+r2)} m \left( -a^2 + b^2 + 6 a (r1+r2) - \right. \right. \right. \\
& \quad \left. \left. \left. 4 m (r1+r2) - (r1+r2)^2 + (a-b+r1+r2) \sqrt{-8 m (r1+r2) + (a+b+r1+r2)^2} \right), \right. \right. \\
& \quad \left. \left. a - m - r1 - \frac{1}{4 (r1+r2)} \left( -a^2 + b^2 + 6 a (r1+r2) - 4 m (r1+r2) - (r1+r2)^2 + \right. \right. \right. \\
& \quad \left. \left. \left. (a-b+r1+r2) \sqrt{-8 m (r1+r2) + (a+b+r1+r2)^2} \right), 0, b \right\}, \right. \\
& \left. \left\{ \frac{1}{8 b (r1+r2)} m \left( a^2 - b^2 + 6 b (r1+r2) - 4 m (r1+r2) - (r1+r2)^2 + \right. \right. \right. \\
& \quad \left. \left. \left. (-a+b+r1+r2) \sqrt{-8 m (r1+r2) + (a+b+r1+r2)^2} \right), 0, \right. \right. \\
& \quad \left. \left. b - m - r2 - \frac{1}{4 (r1+r2)} \left( a^2 - b^2 + 6 b (r1+r2) - 4 m (r1+r2) - (r1+r2)^2 + \right. \right. \right. \\
& \quad \left. \left. \left. (-a+b+r1+r2) \sqrt{-8 m (r1+r2) + (a+b+r1+r2)^2} \right), a \right\}, \right. \\
& \left. \left\{ \frac{1}{64 a b (r1+r2)^2} m \left( - \left( -a^2 + b^2 + 6 a (r1+r2) - 4 m (r1+r2) - (r1+r2)^2 + \right. \right. \right. \right. \\
& \quad \left. \left. \left. (a-b+r1+r2) \sqrt{-8 m (r1+r2) + (a+b+r1+r2)^2} \right) \left( a^2 - b^2 + 6 b (r1+r2) - \right. \right. \right. \\
& \quad \left. \left. \left. 4 m (r1+r2) - (r1+r2)^2 + (-a+b+r1+r2) \sqrt{-8 m (r1+r2) + (a+b+r1+r2)^2} \right)^2 + \right. \right. \\
& \quad \left. \left. \left. 2 \left( -8 m^2 (r1+r2)^2 - 4 m (r1+r2) (a^2 + (-b+r1+r2)^2 - 2 a (b+r1+r2)) + \right. \right. \right. \\
& \quad \left. \left. \left. (a-b-r1-r2) (a+b-r1-r2) (a-b+r1+r2) \right. \right. \right. \\
& \quad \left. \left. \left. \left( a+b+r1+r2 - \sqrt{-8 m (r1+r2) + (a+b+r1+r2)^2} \right) \right) \right) \right) \right), \\
& \quad \frac{1}{16 b (r1+r2)^2} \left( 8 m^2 (r1+r2)^2 + 4 m (r1+r2) (a^2 + (-b+r1+r2)^2 - 2 a (b+r1+r2)) - \right. \\
& \quad \left. (a-b-r1-r2) (a+b-r1-r2) (a-b+r1+r2) \right. \\
& \quad \left. \left( a+b+r1+r2 - \sqrt{-8 m (r1+r2) + (a+b+r1+r2)^2} \right) + 2 m (r1+r2) \left( a^2 - b^2 + 6 b (r1+r2) - \right. \right. \\
& \quad \left. \left. 4 m (r1+r2) - (r1+r2)^2 + (-a+b+r1+r2) \sqrt{-8 m (r1+r2) + (a+b+r1+r2)^2} \right) \right), \\
& \quad \frac{1}{16 a (r1+r2)^2} \left( 8 m^2 (r1+r2)^2 + 4 m (r1+r2) (a^2 + (-b+r1+r2)^2 - 2 a (b+r1+r2)) - \right. \\
& \quad \left. (a-b-r1-r2) (a+b-r1-r2) (a-b+r1+r2) \right. \\
& \quad \left. \left( a+b+r1+r2 - \sqrt{-8 m (r1+r2) + (a+b+r1+r2)^2} \right) + \right. \\
& \quad \left. 2 m (r1+r2) \left( -a^2 + b^2 + 6 a (r1+r2) - 4 m (r1+r2) - (r1+r2)^2 + \right. \right. \\
& \quad \left. \left. (a-b+r1+r2) \sqrt{-8 m (r1+r2) + (a+b+r1+r2)^2} \right) \right), \\
& \quad \left. \left. \frac{1}{2} \left( -a - b + 2 m - r1 - r2 - \sqrt{-8 m (r1+r2) + (a+b+r1+r2)^2} \right) \right\} \right\}
\end{aligned}$$

Now we proceed analogous to the previous steps, but starting from eqs. (4.25) and (4.26) in BA2011 for the differentials of  $n$ ,  $D_{AC}$ ,  $D_{CB}$  and  $D_{ACB}$ .

```
In[108]:= JTarget := Map[Table[D[#, i], {i, {p, q, DAB, n, DAC, DCB, DACB}}] &, diffEqsTarget]
JTarget // MatrixForm
```

Out[109]//MatrixForm=

$$\begin{pmatrix} -m - a(-1 + p) - a p & & & & & & & & & \\ 0 & & & & & & & & & \\ & -2 a DAB + m q & & & & & & & & \\ & & m(DCB + (-n + nC)(1 - q)) & & & & & & & \\ -2 a DAC + m(-DACB + DAB(-n + nC) + DCB(1 - p) - DCB p + (-n + nC) p(1 - q) - DAC(-1 + & & & & & & & & & \\ & & & m(-DCB q + (-n + nC)(1 - q) q) & & & & & & \\ -2 a DACB + m(-DAB DCB - DAB(-n + nC) + DACB q + DCB p q + (-n + nC) p(1 - q) q + DAC(-1 + q) q + DCB & & & & & & & & & \end{pmatrix}$$

```
In[110]:= JPrepTarget = JTarget /. {n -> nC, DAC -> 0, DCB -> 0, DACB -> 0} // FullSimplify;
JPrepTarget // TableForm
```

Out[111]//TableForm=

|                 |                 |                                     |   |                                    |   |
|-----------------|-----------------|-------------------------------------|---|------------------------------------|---|
| a - m - 2 a p   | 0               | b                                   | 0 | 0                                  | 0 |
| 0               | b - m - 2 b q   | a                                   | 0 | 0                                  | 0 |
| - 2 a DAB + m q | - 2 b DAB + m p | a + b - m - 2 a p - 2 b q - r1 - r2 | 0 | 0                                  | 0 |
| 0               | 0               | 0                                   | 0 | $m(p(-1 + q) - q)$                 | 0 |
| 0               | 0               | 0                                   | 0 | $-m p(DAB + p + q - p q)$          | 0 |
| 0               | 0               | 0                                   | 0 | $-m q(DAB + p + q - p q)$          | 0 |
| 0               | 0               | 0                                   | 0 | $-m(DAB + p(-1 + q) - q)(DAB - p)$ | 0 |

JPrep // TableForm

|               |               |                                     |        |                    |           |
|---------------|---------------|-------------------------------------|--------|--------------------|-----------|
| a - m - 2 a p | 0             | b                                   | 0      | 0                  | 0         |
| 0             | b - m - 2 b q | a                                   | 0      | 0                  | 0         |
| m q           | m p           | a + b - m - 2 a p - 2 b q - r1 - r2 | 0      | 0                  | 0         |
| 0             | 0             | 0                                   | -m     | a                  | b         |
| 0             | 0             | 0                                   | m p    | a - m - 2 a p - r1 | 0         |
| 0             | 0             | 0                                   | m q    | 0                  | b - m - 2 |
| 0             | 0             | 0                                   | -m p q | m q                | m p       |

JPrep - JPrepTarget // TableForm

|   |   |   |                               |                            |                             |   |   |   |   |
|---|---|---|-------------------------------|----------------------------|-----------------------------|---|---|---|---|
| 0 | 0 | 0 | 0                             | 0                          | 0                           | 0 | 0 | 0 | 0 |
| 0 | 0 | 0 | 0                             | 0                          | 0                           | 0 | 0 | 0 | 0 |
| 0 | 0 | 0 | 0                             | 0                          | 0                           | 0 | 0 | 0 | 0 |
| 0 | 0 | 0 | $-m - m(p(-1 + q) - q)$       | $-m(-1 + q)$               | $-m(-1 + p)$                | 0 | 0 | 0 | 0 |
| 0 | 0 | 0 | $m p + m p(p + q - p q)$      | $-m - m(-1 + p - p q)$     | $m(-1 + p) p$               | 0 | 0 | 0 | 0 |
| 0 | 0 | 0 | $m q + m q(p + q - p q)$      | $m(-1 + q) q$              | $-m - m(-1 + q - p q)$      | 0 | 0 | 0 | 0 |
| 0 | 0 | 0 | $-m p q + m p q(p + q - p q)$ | $m q - m(1 + p(-1 + q)) q$ | $m p - m p(1 + (-1 + p) q)$ | 0 | 0 | 0 | 0 |

We note that the two matrices differ. At least one must be wrong.

Now we plug in the equilibrium coordinates into the generic matrix of first-order partial derivatives:

JTarget /. ruleApplyEq // MatrixForm

$$\begin{pmatrix} -m - \frac{-a^2+b^2+6 a (r1+r2)-4 m (r1+r2)-(r1+r2)^2+(a-b+r1+r2) \sqrt{-8 m (r1+r2)+(a+b+r1+r2)^2}}{8 (r1+r2)} - a & 0 & 0 & 0 & 0 & 0 & 0 \\ 0 & 0 & 0 & 0 & 0 & 0 & 0 \\ m \left( \frac{a^2-b^2+6 b (r1+r2)-4 m (r1+r2)-(r1+r2)^2+(-a+b+r1+r2) \sqrt{-8 m (r1+r2)+(a+b+r1+r2)^2}}{8 b (r1+r2)} \right) - \frac{-8 m^2 (r1+r2)^2-4 m (r1+r2) (a^2-2 a b+b^2-2 a}{8 b (r1+r2)} & 0 & 0 & 0 & 0 & 0 & 0 \\ 0 & 0 & 0 & 0 & 0 & 0 & 0 \\ 0 & 0 & 0 & 0 & 0 & 0 & 0 \\ 0 & 0 & 0 & 0 & 0 & 0 & 0 \\ 0 & 0 & 0 & 0 & 0 & 0 & 0 \end{pmatrix}$$

■ Using the Ansatz  $m_e = -\lambda_N = m z$

JEqGeneric // MatrixForm

$$\begin{pmatrix} \frac{1}{4} \left( -2 a + r1 + r2 + \frac{(a-b)(a+b)}{r1+r2} - \sqrt{-8 m (r1+r2)+(a+b+r1+r2)^2} - \frac{a \sqrt{-8 m (r1+r2)+(a+b+r1+r2)^2}}{r1+r2} \right) & 0 & 0 & 0 & 0 & 0 & 0 \\ 0 & 0 & 0 & 0 & 0 & 0 & 0 \\ \frac{8 m^2 (r1+r2)^2+4 m (r1+r2) (a^2+(-b+r1+r2)^2-2 a (b+r1+r2))-(a-b-r1-r2) (a+b-r1-r2) (a-b+r1+r2) (a+b+r1+r2-\sqrt{-8 m (r1+r2)+(a+b+r1+r2)^2})}{16 b (r1+r2)^2} & 0 & 0 & 0 & 0 & 0 & 0 \\ 0 & 0 & 0 & 0 & 0 & 0 & 0 \\ 0 & 0 & 0 & 0 & 0 & 0 & 0 \\ 0 & 0 & 0 & 0 & 0 & 0 & 0 \\ 0 & 0 & 0 & 0 & 0 & 0 & 0 \end{pmatrix}$$

Simplify[Series[Det[JTarget - x IdentityMatrix[7] /. x -> -m z], {m, 0, 1}], Assumptions -> {a >= 0, b >= 0, r1 >= 0, r2 >= 0}] // Normal

$$\begin{aligned} & -a b m (a (-1+2 p) + b (-1+2 q) + r1+r2) (a (-1+2 p) (2 DAB + (-1+2 p) (-1+2 q)) + \\ & (-1+2 q) (b (1+2 DAB - 2 p - 2 q + 4 p q) + (-1+2 p) (r1+r2))) \\ & (r1 (r2 (p+q-p q-z) + b (3 q^2+p (-1+4 q-3 q^2) + q (-1+DAB-2 z) + z)) + \\ & a (r2 (-3 p^2 (-1+q) - q+p (-1+DAB+4 q-2 z) + z) + b (DAB^2+q-3 q^2 - \\ & 3 p^2 (1-4 q+3 q^2) + 2 DAB (p q-z) - z+2 q z+p (1-7 q+12 q^2+2 z-4 q z)))) \end{aligned}$$

```
Simplify[Solve[% == 0, z]]
```

$$\left\{ \left\{ z \rightarrow \frac{\left( r_1 \left( -b \left( p + q - DAB \, q - 4 \, p \, q - 3 \, q^2 + 3 \, p \, q^2 \right) + (p + q - p \, q) \, r_2 \right) + a \left( b \left( DAB^2 + 2 \, DAB \, p \, q - (-1 + 3 \, p) \left( p \, (-1 + q) - q \right) \left( -1 + 3 \, q \right) - (3 \, p^2 \, (-1 + q) + q - p \, (-1 + DAB + 4 \, q) \right) \, r_2 \right) \right)}{\left( r_1 \left( b \, (-1 + 2 \, q) + r_2 \right) + a \left( b \left( 1 + 2 \, DAB - 2 \, p - 2 \, q + 4 \, p \, q \right) + (-1 + 2 \, p) \, r_2 \right) \right)} \right\} \right\}$$

This is obviously not the same as in Bürger and Akerman (2011, Eq. 4.30).

Applying the same Ansatz to the Jacobian obtained from the differential equations developed in this Mathematica Notebook yields the correct solution:

```
Simplify[Series[Det[JEqGeneric - x IdentityMatrix[7] /. x -> -m z], {m, 0, 1}],
Assumptions -> {a >= 0, b >= 0, r1 >= 0, r2 >= 0}] // Normal
```

$$a \, b \, m \, (a + b + r_1 + r_2)^2 \, (a \, (b + r_2) \, z + r_1 \, (r_2 \, (-1 + z) + b \, z))$$

```
Simplify[Solve[% == 0, z]]
```

$$\left\{ \left\{ z \rightarrow \frac{r_1 \, r_2}{(a + r_1) \, (b + r_2)} \right\} \right\}$$

which is identical to eq. (4.30) in BA2011.

#### ■ Assuming weak migration

The coordinates of the internal equilibrium under the assumption of weak migration, up to and including first-order terms of  $m$ , can be obtained from eq. (4.1) in BA2011.

```
In[112]:= pEqBAWeakMig = FullSimplify[Series[pEqBA, {m, 0, 1}] // Normal,
Assumptions -> {0 < a < b, 0 < m, 0 < r1, 0 < r2}];
qEqBAWeakMig = FullSimplify[Series[qEqBA, {m, 0, 1}] // Normal,
Assumptions -> {0 < a < b, 0 < m, 0 < r1, 0 < r2}];
DABEqBAWeakMig = FullSimplify[Series[DABEqBA, {m, 0, 1}] // Normal,
Assumptions -> {0 < a < b, 0 < m, 0 < r1, 0 < r2}];
{pEqBAWeakMig, qEqBAWeakMig, DABEqBAWeakMig} // TableForm
```

$$1 - \frac{m \, (a + r_1 + r_2)}{a \, (a + b + r_1 + r_2)}$$

$$1 - \frac{m \, (b + r_1 + r_2)}{b \, (a + b + r_1 + r_2)}$$

$$\frac{m}{a + b + r_1 + r_2}$$

Checking these against first-order terms w.r.t.  $m$  of Eq. (4.1) in BA2011:

$$1 - \frac{m}{a} \left( 1 - \frac{b}{a + b + r} \right) - pEqBAWeakMig /. \{r \rightarrow r_1 + r_2\} // FullSimplify$$

0

$$1 - \frac{m}{b} \left( 1 - \frac{a}{a + b + r} \right) - qEqBAWeakMig /. \{r \rightarrow r_1 + r_2\} // FullSimplify$$

0

$$\frac{m}{a + b + r} - DABEqBAWeakMig /. \{r \rightarrow r_1 + r_2\} // FullSimplify$$

0

```
In[115]:= ruleApplyEqWeakMig := {p -> pEqBAWeakMig, q -> qEqBAWeakMig,
n -> nC, DAB -> DABEqBAWeakMig, DAC -> 0, DCB -> 0, DACB -> 0}
```

```
ruleApplyEqWeakMig
```

$$\left\{ p \rightarrow 1 - \frac{m \, (a + r_1 + r_2)}{a \, (a + b + r_1 + r_2)}, q \rightarrow 1 - \frac{m \, (b + r_1 + r_2)}{b \, (a + b + r_1 + r_2)}, \right.$$

$$\left. n \rightarrow nC, DAB \rightarrow \frac{m}{a + b + r_1 + r_2}, DAC \rightarrow 0, DCB \rightarrow 0, DACB \rightarrow 0 \right\}$$

JPrep // MatrixForm

$$\begin{pmatrix} a - m - 2 a p & 0 & b & 0 & 0 & 0 \\ 0 & b - m - 2 b q & a & 0 & 0 & 0 \\ -2 a DAB + m q & -2 b DAB + m p & a + b - m - 2 a p - 2 b q - r1 - r2 & 0 & 0 & 0 \\ 0 & 0 & 0 & -m & a & b \\ 0 & 0 & 0 & m p & a - m - 2 a p - r1 & 0 \\ 0 & 0 & 0 & m q & 0 & b - m - 2 b q \\ 0 & 0 & 0 & m (DAB - p q) & -2 a DAB + m q & -2 b DAB + m p \end{pmatrix}$$

Now we see the block structure claimed in eq. (4.27) of BA2011.

In[116]:= JEQ = JPrep /. ruleApplyEqWeakMig // FullSimplify;  
JEQ // MatrixForm

Out[117]//MatrixForm=

$$\begin{pmatrix} -a + m - \frac{2 b m}{a+b+r1+r2} & 0 & b & 0 & 0 & 0 \\ 0 & -b + m - \frac{2 a m}{a+b+r1+r2} & a & 0 & 0 & 0 \\ \frac{m (-a b + (b-m) (b+r1+r2))}{b (a+b+r1+r2)} & m \left( 1 - \frac{a (2 b+m) + m (r1+r2)}{a (a+b+r1+r2)} \right) & -a - b + 3 m - r1 - r2 - \frac{2 (a+b) m}{a+b+r1+r2} & 0 & 0 & 0 \\ 0 & 0 & 0 & -m & a & b \\ 0 & 0 & 0 & m p & a - m - 2 a p - r1 & 0 \\ 0 & 0 & 0 & m q & 0 & b - m - 2 b q \\ 0 & 0 & 0 & m \left( \frac{m}{a+b+r1+r2} - \left( 1 - \frac{m}{a (a+b+r1+r2)} \right) \right) & -2 a DAB + m q & -2 b DAB + m p \end{pmatrix}$$

The matrix above should correspond to the one given in Box 1 in BA2011, but it does not. For instance, the difference between the elements at the bottom right position is:

$$-a - b + 3 m - r1 - r2 - \frac{2 (a+b) m}{a+b+r1+r2} - \left( -a - b - r + 2 m \frac{(a+b+2 r)}{a+b+r} \right) /. \{r \rightarrow r1+r2\} //$$

FullSimplify

-m

In[118]:= JEQTarget = JPrepTarget /. ruleApplyEqWeakMig // FullSimplify;  
JEQTarget // MatrixForm

Out[119]//MatrixForm=

$$\begin{pmatrix} -a + m - \frac{2 b m}{a+b+r1+r2} & 0 & b & 0 & 0 & 0 \\ 0 & -b + m - \frac{2 a m}{a+b+r1+r2} & a & 0 & 0 & 0 \\ \frac{m (-a b + (b-m) (b+r1+r2))}{b (a+b+r1+r2)} & m \left( 1 - \frac{a (2 b+m) + m (r1+r2)}{a (a+b+r1+r2)} \right) & -a - b + 3 m - r1 - r2 - \frac{2 (a+b) m}{a+b+r1+r2} & 0 & 0 & 0 \\ 0 & 0 & 0 & -m & a & b \\ 0 & 0 & 0 & m p & a - m - 2 a p - r1 & 0 \\ 0 & 0 & 0 & m q & 0 & b - m - 2 b q \\ 0 & 0 & 0 & m \left( \frac{m}{a+b+r1+r2} - \left( 1 - \frac{m}{a (a+b+r1+r2)} \right) \right) & -2 a DAB + m q & -2 b DAB + m p \end{pmatrix}$$

But the matrix above is also different from the one presented in Box 1 in BA2011.

**JEq // MatrixForm**

$$\begin{pmatrix} -a + m - \frac{2bm}{a+b+r_1+r_2} & 0 & b & 0 & 0 & 0 & 0 \\ 0 & -b + m - \frac{2am}{a+b+r_1+r_2} & a & 0 & 0 & 0 & 0 \\ \frac{m(-a+b)(b-m)(b+r_1+r_2)}{b(a+b+r_1+r_2)} & m\left(1 - \frac{a(2b+m)+m(r_1+r_2)}{a(a+b+r_1+r_2)}\right) & -a-b+3m-r_1-r_2 - \frac{2(a+b)m}{a+b+r_1+r_2} & 0 & 0 & 0 & 0 \\ 0 & 0 & 0 & 0 & 0 & m\left(1 - \frac{m}{a}\right) & 0 \\ 0 & 0 & 0 & 0 & 0 & 0 & m\left(1 - \frac{m}{b}\right) \\ 0 & 0 & 0 & 0 & 0 & 0 & m\left(\frac{m}{a+b+r_1+r_2} - \left(1 - \frac{m(a+r_1)}{a(a+b+r_1+r_2)}\right)\right) \\ 0 & 0 & 0 & 0 & 0 & 0 & 0 \end{pmatrix}$$

In[120]:= **JEqN = JEq[{{4, 5, 6, 7}, {4, 5, 6, 7}}];**  
**JEqN // MatrixForm**

Out[121]//MatrixForm=

$$\begin{pmatrix} -m & a & b & 0 & 0 & 0 & 0 \\ m\left(1 - \frac{m(a+r_1+r_2)}{a(a+b+r_1+r_2)}\right) & -a+m-r_1 - \frac{2bm}{a+b+r_1+r_2} & 0 & 0 & 0 & 0 & 0 \\ m\left(1 - \frac{m(b+r_1+r_2)}{b(a+b+r_1+r_2)}\right) & 0 & -b+m-r_2 - \frac{2am}{a+b+r_1+r_2} & 0 & 0 & 0 & 0 \\ m\left(\frac{m}{a+b+r_1+r_2} - \left(1 - \frac{m(a+r_1+r_2)}{a(a+b+r_1+r_2)}\right)\left(1 - \frac{m(b+r_1+r_2)}{b(a+b+r_1+r_2)}\right)\right) & \frac{m(-a+b)(b-m)(b+r_1+r_2)}{b(a+b+r_1+r_2)} & m\left(1 - \frac{a(2b+m)+m(r_1+r_2)}{a(a+b+r_1+r_2)}\right) & -a-b+3m-r_1-r_2 - \frac{2(a+b)m}{a+b+r_1+r_2} & 0 & 0 & 0 \end{pmatrix}$$

If we now assume that the migration rate m is weak, we obtain

In[122]:= **JEqNSmall := Simplify[Normal[Series[JEq, {m, 0, 1}]]]**  
**JEqNSmall // MatrixForm**

Out[123]//MatrixForm=

$$\begin{pmatrix} -a + m - \frac{2bm}{a+b+r_1+r_2} & 0 & b & 0 & 0 & 0 & 0 \\ 0 & -b + m - \frac{2am}{a+b+r_1+r_2} & a & 0 & 0 & 0 & 0 \\ \frac{m(-a+b+r_1+r_2)}{a+b+r_1+r_2} & m - \frac{2bm}{a+b+r_1+r_2} & -a-b-r_1-r_2 + \frac{m(a+b+3(r_1+r_2))}{a+b+r_1+r_2} & 0 & 0 & 0 & 0 \\ 0 & 0 & 0 & 0 & -m & a & 0 \\ 0 & 0 & 0 & 0 & m & -a+m-r_1 - \frac{2bm}{a+b+r_1+r_2} & 0 \\ 0 & 0 & 0 & 0 & m & 0 & -b+m \\ 0 & 0 & 0 & 0 & -m & \frac{m(-a+b+r_1+r_2)}{a+b+r_1+r_2} & m \end{pmatrix}$$

In[124]:= **JEqNmSmall := JEqNSmall[[4 ;; 7, 4 ;; 7]]**  
**JEqNmSmall // MatrixForm**

Out[125]//MatrixForm=

$$\begin{pmatrix} -m & a & b & 0 \\ m & -a+m-r_1 - \frac{2bm}{a+b+r_1+r_2} & 0 & b \\ m & 0 & -b+m-r_2 - \frac{2am}{a+b+r_1+r_2} & a \\ -m & \frac{m(-a+b+r_1+r_2)}{a+b+r_1+r_2} & m - \frac{2bm}{a+b+r_1+r_2} & -a-b-r_1-r_2 + \frac{m(a+b+3(r_1+r_2))}{a+b+r_1+r_2} \end{pmatrix}$$

This can alternatively be written as

$$\text{JEqNmSmallDispl} := \left\{ \{-m, a, b, 0\}, \left\{ m, -a-r_1 + \frac{m(a-b+r)}{a+b+r}, 0, b \right\}, \left\{ m, 0, -b-r_2 + \frac{m(b-a+r)}{a+b+r}, a \right\}, \left\{ -m, \frac{m(b-a+r)}{a+b+r}, \frac{m(a-b+r)}{a+b+r}, -a-b-r + \frac{m(a+b+3r)}{a+b+r} \right\} \right\}$$

**JEqNmSmallDispl - JEqNmSmall /. {r -> r1+r2} // Simplify**

$$\{\{0, 0, 0, 0\}, \{0, 0, 0, 0\}, \{0, 0, 0, 0\}, \{0, 0, 0, 0\}\}$$

**JEqNmSmallDispl // MatrixForm**

$$\begin{pmatrix} -m & a & b & 0 \\ m & -a + \frac{m(a-b+r)}{a+b+r} - r1 & 0 & b \\ m & 0 & -b + \frac{m(-a+b+r)}{a+b+r} - r2 & a \\ -m & \frac{m(-a+b+r)}{a+b+r} & \frac{m(a-b+r)}{a+b+r} & -a - b - r + \frac{m(a+b+3r)}{a+b+r} \end{pmatrix}$$

In[126]:= **JEqNTarget = JEqTarget[{{4, 5, 6, 7}, {4, 5, 6, 7}}];**  
**JEqNTarget // MatrixForm**

Out[127]//MatrixForm=

$$\begin{pmatrix} -m + \frac{m^3(a+r1+r2)(b+r1+r2)}{ab(a+b+r1+r2)^2} \\ -\frac{m(a^2-m(r1+r2)+a(b-m+r1+r2))(a^3b-m^2(r1+r2)(b+r1+r2)+a^2b(2b+m+2(r1+r2))+a(b+r1+r2)(b^2-m^2+b(m+r1+r2)))}{a^2b(a+b+r1+r2)^3} \\ -\frac{m(-ab-(b-m)(b+r1+r2))(-a^3b+m^2(r1+r2)(b+r1+r2)-a^2b(2b+m+2(r1+r2))-a(b+r1+r2)(b^2-m^2+b(m+r1+r2)))}{a^2b(a+b+r1+r2)^3} \\ -m \left( -1 + \frac{m(a^2b+a(b+m)(b+r1+r2)+m(r1+r2)(b+r1+r2))}{ab(a+b+r1+r2)^2} \right) \left( \frac{m}{a+b+r1+r2} - \left( 1 - \frac{m(a+r1+r2)}{a(a+b+r1+r2)} \right) \left( 1 - \frac{m(b+r1+r2)}{b(a+b+r1+r2)} \right) \right) m \left( 1 - \right. \end{pmatrix}$$

**Eigenvalues[JEqN] // Simplify**

A very large output was generated. Here is a sample of it:

$$\left\{ \text{Root} \left[ a^3 b m^3 + 2 a^2 b^2 m^3 + \langle\langle 133 \rangle\rangle + \left( a^3 + 3 a^2 b + 3 a b^2 + b^3 + 3 a^2 r1 + 6 a b r1 + 3 b^2 r1 + 3 a r1^2 + 3 b r1^2 + r1^3 + 3 a^2 r2 + 6 a b r2 + 3 b^2 r2 + 6 a r1 r2 + 6 b r1 r2 + 3 r1^2 r2 + 3 a r2^2 + 3 b r2^2 + 3 r1 r2^2 + r2^3 \right) \#1^4 \&, 1 \right], \right. \\ \text{Root} \left[ a^3 b m^3 + 2 a^2 b^2 m^3 + \langle\langle 133 \rangle\rangle + \left( a^3 + 3 a^2 b + 3 a b^2 + b^3 + 3 a^2 r1 + 6 a b r1 + 3 b^2 r1 + 3 a r1^2 + 3 b r1^2 + r1^3 + 3 a^2 r2 + 6 a b r2 + 3 b^2 r2 + 6 a r1 r2 + 6 b r1 r2 + 3 r1^2 r2 + 3 a r2^2 + 3 b r2^2 + 3 r1 r2^2 + r2^3 \right) \#1^4 \&, 2 \right], \text{Root} \left[ \right. \\ a^3 b m^3 + \langle\langle 1 \rangle\rangle + \langle\langle 133 \rangle\rangle + \left( a^3 + 3 a^2 b + 3 a b^2 + b^3 + \langle\langle 13 \rangle\rangle + 3 b r2^2 + 3 r1 r2^2 + r2^3 \right) \#1^4 \&, 3 \right], \\ \left. \text{Root} \left[ a^3 b m^3 + 2 a^2 b^2 m^3 + \langle\langle 133 \rangle\rangle + \left( a^3 + 3 a^2 b + 3 a b^2 + b^3 + 3 a^2 r1 + 6 a b r1 + 3 b^2 r1 + 3 a r1^2 + 3 b r1^2 + r1^3 + 3 a^2 r2 + 6 a b r2 + 3 b^2 r2 + 6 a r1 r2 + 6 b r1 r2 + 3 r1^2 r2 + 3 a r2^2 + 3 b r2^2 + 3 r1 r2^2 + r2^3 \right) \#1^4 \&, 4 \right] \right\}$$

Show Less Show More Show Full Output Set Size Limit...

**Eigenvalues[JEqNTarget]**

A very large output was generated. Here is a sample of it:

$$\left\{ \text{Root} \left[ \right. \right. \\ 4 a^{10} b^3 m + \langle\langle 1731 \rangle\rangle + \left( a^8 b^2 + 6 a^7 b^3 + 15 a^6 b^4 + 20 a^5 b^5 + 15 a^4 b^6 + 6 a^3 b^7 + a^2 b^8 + 6 a^7 b^2 r1 + \right. \\ 30 a^6 b^3 r1 + 60 a^5 b^4 r1 + 60 a^4 b^5 r1 + 30 a^3 b^6 r1 + 6 a^2 b^7 r1 + 15 a^6 b^2 r1^2 + 60 a^5 b^3 r1^2 + \\ 90 a^4 b^4 r1^2 + 60 a^3 b^5 r1^2 + 15 a^2 b^6 r1^2 + 20 a^5 b^2 r1^3 + 60 a^4 b^3 r1^3 + 60 a^3 b^4 r1^3 + \\ 20 a^2 b^5 r1^3 + 15 a^4 b^2 r1^4 + \langle\langle 38 \rangle\rangle + 60 a^3 b^2 r1^3 r2^2 + 60 a^2 b^3 r1^3 r2^2 + 15 a^2 b^2 r1^4 r2^2 + \\ 20 a^5 b^2 r2^3 + 60 a^4 b^3 r2^3 + 60 a^3 b^4 r2^3 + 20 a^2 b^5 r2^3 + 60 a^4 b^2 r1 r2^3 + 120 a^3 b^3 r1 r2^3 + \\ 60 a^2 b^4 r1 r2^3 + 60 a^3 b^2 r1^2 r2^3 + 60 a^2 b^3 r1^2 r2^3 + 20 a^2 b^2 r1^3 r2^3 + 15 a^4 b^2 r2^4 + \\ 30 a^3 b^3 r2^4 + 15 a^2 b^4 r2^4 + 30 a^3 b^2 r1 r2^4 + 30 a^2 b^3 r1 r2^4 + 15 a^2 b^2 r1^2 r2^4 + \\ \left. \left. 6 a^3 b^2 r2^5 + 6 a^2 b^3 r2^5 + 6 a^2 b^2 r1 r2^5 + a^2 b^2 r2^6 \right) \#1^4 \&, 1 \right], \langle\langle 2 \rangle\rangle, \text{Root} \left[ \langle\langle 1 \rangle\rangle \&, 4 \right] \right\}$$

Show Less Show More Show Full Output Set Size Limit...

- Using the Ansatz  $m_e = -\lambda_N = m z$

**JEq**

$$\left\{ \left\{ -a + m - \frac{2 b m}{a + b + r1 + r2}, 0, b, 0, 0, 0, 0 \right\}, \left\{ 0, -b + m - \frac{2 a m}{a + b + r1 + r2}, a, 0, 0, 0, 0 \right\}, \right. \\ \left. \left\{ \frac{m (-a b + (b - m) (b + r1 + r2))}{b (a + b + r1 + r2)}, m \left( 1 - \frac{a (2 b + m) + m (r1 + r2)}{a (a + b + r1 + r2)} \right), \right. \right. \\ \left. \left. -a - b + 3 m - r1 - r2 - \frac{2 (a + b) m}{a + b + r1 + r2}, 0, 0, 0, 0 \right\}, \left\{ 0, 0, 0, -m, a, b, 0 \right\}, \right. \\ \left. \left\{ 0, 0, 0, m \left( 1 - \frac{m (a + r1 + r2)}{a (a + b + r1 + r2)} \right), -a + m - r1 - \frac{2 b m}{a + b + r1 + r2}, 0, b \right\}, \right. \\ \left. \left\{ 0, 0, 0, m \left( 1 - \frac{m (b + r1 + r2)}{b (a + b + r1 + r2)} \right), 0, -b + m - r2 - \frac{2 a m}{a + b + r1 + r2}, a \right\}, \right. \\ \left. \left\{ 0, 0, 0, m \left( \frac{m}{a + b + r1 + r2} - \left( 1 - \frac{m (a + r1 + r2)}{a (a + b + r1 + r2)} \right) \left( 1 - \frac{m (b + r1 + r2)}{b (a + b + r1 + r2)} \right) \right), \right. \right. \\ \left. \left. \frac{m (-a b + (b - m) (b + r1 + r2))}{b (a + b + r1 + r2)}, m \left( 1 - \frac{a (2 b + m) + m (r1 + r2)}{a (a + b + r1 + r2)} \right), \right. \right. \\ \left. \left. -a - b + 3 m - r1 - r2 - \frac{2 (a + b) m}{a + b + r1 + r2} \right\} \right\}$$

$$\text{Simplify}\left[\text{Series}\left[\text{Det}\left[\text{JEqTarget} - x \text{IdentityMatrix}[7] /. x \rightarrow -m \frac{r1 r2}{(r1 + a) (r2 + b)}\right], \{m, 0, 1\}\right]\right]$$

$$a b (-a - b - r1 - r2) (a^2 b + a b^2 + a b r1 + a b r2 + (a + b + r1 + r2) (3 a b + 2 b r1 + 2 a r2)) m + O[m]^2$$

**JEqTarget // TableForm**

|                                                                |                                                                              |                                                                |                                                                                            |
|----------------------------------------------------------------|------------------------------------------------------------------------------|----------------------------------------------------------------|--------------------------------------------------------------------------------------------|
| $-a + m - \frac{2 b m}{a + b + r1 + r2}$                       | 0                                                                            | b                                                              | 0                                                                                          |
| 0                                                              | $-b + m - \frac{2 a m}{a + b + r1 + r2}$                                     | a                                                              | 0                                                                                          |
| $\frac{m (-a b + (b - m) (b + r1 + r2))}{b (a + b + r1 + r2)}$ | $m \left( 1 - \frac{a (2 b + m) + m (r1 + r2)}{a (a + b + r1 + r2)} \right)$ | $-a - b + 3 m - r1 - r2 - \frac{2 (a + b) m}{a + b + r1 + r2}$ | 0                                                                                          |
| 0                                                              | 0                                                                            | 0                                                              | $-m + \frac{m^3 (a + r1 + r2) (b + a b (a + b + r1 + r2))}{a b (a + b + r1 + r2)}$         |
| 0                                                              | 0                                                                            | 0                                                              | $-\frac{m (a^2 - m (r1 + r2) + a (b - m))}{a b (a + b + r1 + r2)}$                         |
| 0                                                              | 0                                                                            | 0                                                              | $-\frac{m (-a b - (b - m) (b + r1 + r2))}{a b (a + b + r1 + r2)}$                          |
| 0                                                              | 0                                                                            | 0                                                              | $-m \left( -1 + \frac{m (a^2 b + a (b - m) (b + r1 + r2))}{a b (a + b + r1 + r2)} \right)$ |

**Dimensions[JEqTarget]**

{7, 7}

**Simplify[Series[Det[JEqTarget - x IdentityMatrix[7] /. x -> -m z], {m, 0, 1}]] // Normal**

$$a b m (a + b + r1 + r2)^2 (a (b (-4 + z) + r2 (-2 + z)) + r1 (b (-2 + z) + r2 (-1 + z)))$$

**Simplify[Solve[% == 0, z]]**

$$\left\{ \left\{ z \rightarrow \frac{(2 a + r1) (2 b + r2)}{(a + r1) (b + r2)} \right\} \right\}$$

This does not yield the same term as the one given in eq. (4.30) of BA2011, which suggests that the equations (4.25) and (4.26) in BA2011 are wrong.

Applying the same Ansatz to the Jacobian obtained from the differential equations developed in this Mathematica Notebook, however, yields the correct solution:



```
Simplify[Series[Det[(JEq /. ruleApplyEq) - x IdentityMatrix[7] /. x -> -m z], {m, 0, 1}],
  Assumptions -> {a >= 0, b >= 0, r1 >= 0, r2 >= 0}] // Normal
```

```
a b m (a + b + r1 + r2)^2 (a (b + r2) z + r1 (r2 (-1 + z) + b z))
```

```
Simplify[Solve[% == 0, z]]
```

$$\left\{ \left\{ z \rightarrow \frac{r_1 r_2}{(a + r_1)(b + r_2)} \right\} \right\}$$

which is identical to eq. (4.30) in BA2011.

We can also use the approximate  $J_N$  for small  $m$ :

```
Simplify[Series[Det[(JEqSmall /. ruleApplyEq) - x IdentityMatrix[7] /. x -> -m z],
  {m, 0, 1}], Assumptions -> {a >= 0, b >= 0, r1 >= 0, r2 >= 0}] // Normal
```

```
a b m (a + b + r1 + r2)^2 (a (b + r2) z + r1 (r2 (-1 + z) + b z))
```

```
Simplify[Solve[% == 0, z]]
```

$$\left\{ \left\{ z \rightarrow \frac{r_1 r_2}{(a + r_1)(b + r_2)} \right\} \right\}$$

### ■ Starting directly from eq. (4.28) in BA2011

Next, we directly start with  $J_N$  given in Box 1 (eq. 4.28) of BA2011 and compute the eigenvalues.

```
In[128]= JEQNBA2011 :=
```

$$\left\{ \{-m, a, b, m\}, \left\{ m, -a - r_1 + m \frac{(a - b + r)}{a + b + r}, 0, b - m \right\}, \left\{ m, 0, -b - r_2 + m \frac{b - a + r}{a + b + r}, a - m \right\}, \right. \\ \left. \left\{ -m, m \frac{(b - a + r)}{a + b + r}, m \frac{(a - b + r)}{a + b + r}, -a - b - r + 2m \frac{(a + b + 2r)}{a + b + r} \right\} \right\} /. \{r \rightarrow r_1 + r_2\}$$

```
JEQNBA2011 // MatrixForm
```

$$\begin{pmatrix} -m & a & b & m \\ m & -a - r_1 + \frac{m(a - b + r_1 + r_2)}{a + b + r_1 + r_2} & 0 & b - m \\ m & 0 & -b - r_2 + \frac{m(-a + b + r_1 + r_2)}{a + b + r_1 + r_2} & a - m \\ -m & \frac{m(-a + b + r_1 + r_2)}{a + b + r_1 + r_2} & \frac{m(a - b + r_1 + r_2)}{a + b + r_1 + r_2} & -a - b - r_1 - r_2 + \frac{2m(a + b + 2(r_1 + r_2))}{a + b + r_1 + r_2} \end{pmatrix}$$

```
FullSimplify[Eigenvalues[JEQNBA2011], Assumptions -> {0 < a < b, 0 < m, 0 < r}]
```

$$\left\{ \text{Root} \left[ \begin{aligned} & a^4 b m^2 + 3 a^3 b^2 m^2 + 3 a^2 b^3 m^2 + a b^4 m^2 + a^3 m^4 - a^2 b m^4 - a b^2 m^4 + b^3 m^4 + 2 a^3 b m^2 r_1 + 3 a^2 b^2 m^2 r_1 - \\ & b^4 m^2 r_1 - 2 a^2 b m^3 r_1 + 2 b^3 m^3 r_1 + 3 a^2 m^4 r_1 - 6 a b m^4 r_1 + 3 b^2 m^4 r_1 - a^3 m^2 r_1^2 - 3 a^2 b m^2 r_1^2 - \\ & 6 a b^2 m^2 r_1^2 - 4 b^3 m^2 r_1^2 + 4 a b m^3 r_1^2 + 8 b^2 m^3 r_1^2 - a m^4 r_1^2 - b m^4 r_1^2 - 3 a^2 m^2 r_1^3 - \\ & 8 a b m^2 r_1^3 - 6 b^2 m^2 r_1^3 + 4 a m^3 r_1^3 + 10 b m^3 r_1^3 - 3 m^4 r_1^3 - 3 a m^2 r_1^4 - 4 b m^2 r_1^4 + \\ & 4 m^3 r_1^4 - m^2 r_1^5 - a^4 m^2 r_2 + 3 a^2 b^2 m^2 r_2 + 2 a b^3 m^2 r_2 + 2 a^3 m^3 r_2 - 2 a b^2 m^3 r_2 + 3 a^2 m^4 r_2 - \\ & 6 a b m^4 r_2 + 3 b^2 m^4 r_2 + a^4 m r_1 r_2 + 4 a^3 b m r_1 r_2 + 6 a^2 b^2 m r_1 r_2 + 4 a b^3 m r_1 r_2 + b^4 m r_1 r_2 - \\ & 6 a^3 m^2 r_1 r_2 - 12 a^2 b m^2 r_1 r_2 - 12 a b^2 m^2 r_1 r_2 - 6 b^3 m^2 r_1 r_2 + 8 a^2 m^3 r_1 r_2 + 8 a b m^3 r_1 r_2 + \\ & 8 b^2 m^3 r_1 r_2 - 2 a m^4 r_1 r_2 - 2 b m^4 r_1 r_2 + 4 a^3 m r_1^2 r_2 + 12 a^2 b m r_1^2 r_2 + 12 a b^2 m r_1^2 r_2 + \\ & 4 b^3 m r_1^2 r_2 - 17 a^2 m^2 r_1^2 r_2 - 34 a b m^2 r_1^2 r_2 - 20 b^2 m^2 r_1^2 r_2 + 18 a m^3 r_1^2 r_2 + 24 b m^3 r_1^2 r_2 - \\ & 9 m^4 r_1^2 r_2 + 6 a^2 m r_1^3 r_2 + 12 a b m r_1^3 r_2 + 6 b^2 m r_1^3 r_2 - 20 a m^2 r_1^3 r_2 - 22 b m^2 r_1^3 r_2 + \\ & 16 m^3 r_1^3 r_2 + 4 a m r_1^4 r_2 + 4 b m r_1^4 r_2 - 8 m^2 r_1^4 r_2 + m r_1^5 r_2 - 4 a^3 m^2 r_2^2 - 6 a^2 b m^2 r_2^2 - \\ & 3 a b^2 m^2 r_2^2 - b^3 m^2 r_2^2 + 8 a^2 m^3 r_2^2 + 4 a b m^3 r_2^2 - a m^4 r_2^2 - b m^4 r_2^2 + 4 a^3 m r_1 r_2^2 + \\ & 12 a^2 b m r_1 r_2^2 + 12 a b^2 m r_1 r_2^2 + 4 b^3 m r_1 r_2^2 - 20 a^2 m^2 r_1 r_2^2 - 34 a b m^2 r_1 r_2^2 - \\ & 17 b^2 m^2 r_1 r_2^2 + 24 a m^3 r_1 r_2^2 + 18 b m^3 r_1 r_2^2 - 9 m^4 r_1 r_2^2 + 12 a^2 m r_1^2 r_2^2 + 24 a b m r_1^2 r_2^2 + \\ & 12 b^2 m r_1^2 r_2^2 - 35 a m^2 r_1^2 r_2^2 - 35 b m^2 r_1^2 r_2^2 + 24 m^3 r_1^2 r_2^2 + 12 a m r_1^3 r_2^2 + 12 b m r_1^3 r_2^2 - \\ & 19 m^2 r_1^3 r_2^2 + 4 m r_1^4 r_2^2 - 6 a^2 m^2 r_2^3 - 8 a b m^2 r_2^3 - 3 b^2 m^2 r_2^3 + 10 a m^3 r_2^3 + 4 b m^3 r_2^3 - \\ & 3 m^4 r_2^3 + 6 a^2 m r_1 r_2^3 + 12 a b m r_1 r_2^3 + 6 b^2 m r_1 r_2^3 - 22 a m^2 r_1 r_2^3 - 20 b m^2 r_1 r_2^3 + \\ & 16 m^3 r_1 r_2^3 + 12 a m r_1^2 r_2^3 + 12 b m r_1^2 r_2^3 - 19 m^2 r_1^2 r_2^3 + 6 m r_1^3 r_2^3 - 4 a m^2 r_2^4 - \\ & 3 b m^2 r_2^4 + 4 m^3 r_2^4 + 4 a m r_1 r_2^4 + 4 b m r_1 r_2^4 - 8 m^2 r_1 r_2^4 + 4 m r_1^2 r_2^4 - m^2 r_2^5 + m r_1 r_2^5 + \end{aligned} \right. \right\}$$

$$\begin{aligned}
 & (a^5 b + 4 a^4 b^2 + 6 a^3 b^3 + 4 a^2 b^4 + a b^5 - a^4 b m - 3 a^3 b^2 m - 3 a^2 b^3 m - a b^4 m - 2 a^4 m^2 + 4 a^2 b^2 m^2 - \\
 & 2 b^4 m^2 - a^3 m^3 + a^2 b m^3 + a b^2 m^3 - b^3 m^3 + 5 a^4 b r_1 + 16 a^3 b^2 r_1 + 18 a^2 b^3 r_1 + 8 a b^4 r_1 + b^5 r_1 - \\
 & 8 a^3 b m r_1 - 19 a^2 b^2 m r_1 - 14 a b^3 m r_1 - 3 b^4 m r_1 - 6 a^3 m^2 r_1 + 2 a^2 b m^2 r_1 + 2 a b^2 m^2 r_1 - \\
 & 6 b^3 m^2 r_1 + 3 a^2 m^3 r_1 + 2 a b m^3 r_1 + 3 b^2 m^3 r_1 + 10 a^3 b r_1^2 + 24 a^2 b^2 r_1^2 + 18 a b^3 r_1^2 + \\
 & 4 b^4 r_1^2 - 18 a^2 b m r_1^2 - 29 a b^2 m r_1^2 - 11 b^3 m r_1^2 - 6 a^2 m^2 r_1^2 + 4 a b m^2 r_1^2 - 2 b^2 m^2 r_1^2 + \\
 & 5 a m^3 r_1^2 + 5 b m^3 r_1^2 + 10 a^2 b r_1^3 + 16 a b^2 r_1^3 + 6 b^3 r_1^3 - 16 a b m r_1^3 - 13 b^2 m r_1^3 - \\
 & 2 a m^2 r_1^3 + 2 b m^2 r_1^3 + m^3 r_1^3 + 5 a b r_1^4 + 4 b^2 r_1^4 - 5 b m r_1^4 + b r_1^5 + a^5 r_2 + 8 a^4 b r_2 + \\
 & 18 a^3 b^2 r_2 + 16 a^2 b^3 r_2 + 5 a b^4 r_2 - 3 a^4 m r_2 - 14 a^3 b m r_2 - 19 a^2 b^2 m r_2 - 8 a b^3 m r_2 - \\
 & 6 a^3 m^2 r_2 + 2 a^2 b m^2 r_2 + 2 a b^2 m^2 r_2 - 6 b^3 m^2 r_2 + 3 a^2 m^3 r_2 + 2 a b m^3 r_2 + 3 b^2 m^3 r_2 + \\
 & 5 a^4 r_1 r_2 + 32 a^3 b r_1 r_2 + 54 a^2 b^2 r_1 r_2 + 32 a b^3 r_1 r_2 + 5 b^4 r_1 r_2 - 12 a^3 m r_1 r_2 - \\
 & 50 a^2 b m r_1 r_2 - 50 a b^2 m r_1 r_2 - 12 b^3 m r_1 r_2 - 8 a^2 m^2 r_1 r_2 + 8 a b m^2 r_1 r_2 - 8 b^2 m^2 r_1 r_2 + \\
 & 10 a m^3 r_1 r_2 + 10 b m^3 r_1 r_2 + 10 a^3 r_1^2 r_2 + 48 a^2 b r_1^2 r_2 + 54 a b^2 r_1^2 r_2 + 16 b^3 r_1^2 r_2 - \\
 & 18 a^2 m r_1^2 r_2 - 58 a b m r_1^2 r_2 - 31 b^2 m r_1^2 r_2 - 2 a m^2 r_1^2 r_2 + 2 b m^2 r_1^2 r_2 + 3 m^3 r_1^2 r_2 + \\
 & 10 a^2 r_1^3 r_2 + 32 a b r_1^3 r_2 + 18 b^2 r_1^3 r_2 - 12 a m r_1^3 r_2 - 22 b m r_1^3 r_2 + 5 a r_1^4 r_2 + \\
 & 8 b r_1^4 r_2 - 3 m r_1^4 r_2 + r_1^5 r_2 + 4 a^4 r_2^2 + 18 a^3 b r_2^2 + 24 a^2 b^2 r_2^2 + 10 a b^3 r_2^2 - \\
 & 11 a^3 m r_2^2 - 29 a^2 b m r_2^2 - 18 a b^2 m r_2^2 - 2 a^2 m^2 r_2^2 + 4 a b m^2 r_2^2 - 6 b^2 m^2 r_2^2 + \\
 & 5 a m^3 r_2^2 + 5 b m^3 r_2^2 + 16 a^3 r_1 r_2^2 + 54 a^2 b r_1 r_2^2 + 48 a b^2 r_1 r_2^2 + 10 b^3 r_1 r_2^2 - \\
 & 31 a^2 m r_1 r_2^2 - 58 a b m r_1 r_2^2 - 18 b^2 m r_1 r_2^2 + 2 a m^2 r_1 r_2^2 - 2 b m^2 r_1 r_2^2 + 3 m^3 r_1 r_2^2 + \\
 & 24 a^2 r_1^2 r_2^2 + 54 a b r_1^2 r_2^2 + 24 b^2 r_1^2 r_2^2 - 29 a m r_1^2 r_2^2 - 29 b m r_1^2 r_2^2 + 16 a r_1^3 r_2^2 + \\
 & 18 b r_1^3 r_2^2 - 9 m r_1^3 r_2^2 + 4 r_1^4 r_2^2 + 6 a^3 r_2^3 + 16 a^2 b r_2^3 + 10 a b^2 r_2^3 - 13 a^2 m r_2^3 - \\
 & 16 a b m r_2^3 + 2 a m^2 r_2^3 - 2 b m^2 r_2^3 + m^3 r_2^3 + 18 a^2 r_1 r_2^3 + 32 a b r_1 r_2^3 + 10 b^2 r_1 r_2^3 - \\
 & 22 a m r_1 r_2^3 - 12 b m r_1 r_2^3 + 18 a r_1^2 r_2^3 + 16 b r_1^2 r_2^3 - 9 m r_1^2 r_2^3 + 6 r_1^3 r_2^3 + 4 a^2 r_2^4 + \\
 & 5 a b r_2^4 - 5 a m r_2^4 + 8 a r_1 r_2^4 + 5 b r_1 r_2^4 - 3 m r_1 r_2^4 + 4 r_1^2 r_2^4 + a r_2^5 + r_1 r_2^5) \#1 + \\
 & (a^5 + 6 a^4 b + 13 a^3 b^2 + 13 a^2 b^3 + 6 a b^4 + b^5 - a^4 m - 4 a^3 b m - 6 a^2 b^2 m - 4 a b^3 m - b^4 m - \\
 & 2 a^3 m^2 - 2 a^2 b m^2 - 2 a b^2 m^2 - 2 b^3 m^2 + 5 a^4 r_1 + 24 a^3 b r_1 + 39 a^2 b^2 r_1 + 26 a b^3 r_1 + \\
 & 6 b^4 r_1 - 8 a^3 m r_1 - 26 a^2 b m r_1 - 28 a b^2 m r_1 - 10 b^3 m r_1 - 2 a^2 m^2 r_1 - 2 b^2 m^2 r_1 + \\
 & 10 a^3 r_1^2 + 36 a^2 b r_1^2 + 39 a b^2 r_1^2 + 13 b^3 r_1^2 - 18 a^2 m r_1^2 - 40 a b m r_1^2 - 22 b^2 m r_1^2 + \\
 & 6 a m^2 r_1^2 + 6 b m^2 r_1^2 + 10 a^2 r_1^3 + 24 a b r_1^3 + 13 b^2 r_1^3 - 16 a m r_1^3 - 18 b m r_1^3 + \\
 & 6 m^2 r_1^3 + 5 a r_1^4 + 6 b r_1^4 - 5 m r_1^4 + r_1^5 + 6 a^4 r_2 + 26 a^3 b r_2 + 39 a^2 b^2 r_2 + 24 a b^3 r_2 + \\
 & 5 b^4 r_2 - 10 a^3 m r_2 - 28 a^2 b m r_2 - 26 a b^2 m r_2 - 8 b^3 m r_2 - 2 a^2 m^2 r_2 - 2 b^2 m^2 r_2 + \\
 & 24 a^3 r_1 r_2 + 78 a^2 b r_1 r_2 + 78 a b^2 r_1 r_2 + 24 b^3 r_1 r_2 - 40 a^2 m r_1 r_2 - 80 a b m r_1 r_2 - \\
 & 40 b^2 m r_1 r_2 + 12 a m^2 r_1 r_2 + 12 b m^2 r_1 r_2 + 36 a^2 r_1^2 r_2 + 78 a b r_1^2 r_2 + 39 b^2 r_1^2 r_2 - \\
 & 50 a m r_1^2 r_2 - 52 b m r_1^2 r_2 + 18 m^2 r_1^2 r_2 + 24 a r_1^3 r_2 + 26 b r_1^3 r_2 - 20 m r_1^3 r_2 + \\
 & 6 r_1^4 r_2 + 13 a^3 r_2^2 + 39 a^2 b r_2^2 + 36 a b^2 r_2^2 + 10 b^3 r_2^2 - 22 a^2 m r_2^2 - 40 a b m r_2^2 - \\
 & 18 b^2 m r_2^2 + 6 a m^2 r_2^2 + 6 b m^2 r_2^2 + 39 a^2 r_1 r_2^2 + 78 a b r_1 r_2^2 + 36 b^2 r_1 r_2^2 - 52 a m r_1 r_2^2 - \\
 & 50 b m r_1 r_2^2 + 18 m^2 r_1 r_2^2 + 39 a r_1^2 r_2^2 + 39 b r_1^2 r_2^2 - 30 m r_1^2 r_2^2 + 13 r_1^3 r_2^2 + \\
 & 13 a^2 r_2^3 + 24 a b r_2^3 + 10 b^2 r_2^3 - 18 a m r_2^3 - 16 b m r_2^3 + 6 m^2 r_2^3 + 26 a r_1 r_2^3 + \\
 & 24 b r_1 r_2^3 - 20 m r_1 r_2^3 + 13 r_1^2 r_2^3 + 6 a r_2^4 + 5 b r_2^4 - 5 m r_2^4 + 6 r_1 r_2^4 + r_2^5) \#1^2 + \\
 & (2 a^4 + 8 a^3 b + 12 a^2 b^2 + 8 a b^3 + 2 b^4 - a^3 m - 3 a^2 b m - 3 a b^2 m - b^3 m + 8 a^3 r_1 + 24 a^2 b r_1 + \\
 & 24 a b^2 r_1 + 8 b^3 r_1 - 7 a^2 m r_1 - 14 a b m r_1 - 7 b^2 m r_1 + 12 a^2 r_1^2 + 24 a b r_1^2 + 12 b^2 r_1^2 - \\
 & 11 a m r_1^2 - 11 b m r_1^2 + 8 a r_1^3 + 8 b r_1^3 - 5 m r_1^3 + 2 r_1^4 + 8 a^3 r_2 + 24 a^2 b r_2 + \\
 & 24 a b^2 r_2 + 8 b^3 r_2 - 7 a^2 m r_2 - 14 a b m r_2 - 7 b^2 m r_2 + 24 a^2 r_1 r_2 + 48 a b r_1 r_2 + \\
 & 24 b^2 r_1 r_2 - 22 a m r_1 r_2 - 22 b m r_1 r_2 + 24 a r_1^2 r_2 + 24 b r_1^2 r_2 - 15 m r_1^2 r_2 + \\
 & 8 r_1^3 r_2 + 12 a^2 r_2^2 + 24 a b r_2^2 + 12 b^2 r_2^2 - 11 a m r_2^2 - 11 b m r_2^2 + 24 a r_1 r_2^2 + \\
 & 24 b r_1 r_2^2 - 15 m r_1 r_2^2 + 12 r_1^2 r_2^2 + 8 a r_2^3 + 8 b r_2^3 - 5 m r_2^3 + 8 r_1 r_2^3 + 2 r_2^4) \#1^3 + \\
 & (a^3 + 3 a^2 b + 3 a b^2 + b^3 + 3 a^2 r_1 + 6 a b r_1 + 3 b^2 r_1 + 3 a r_1^2 + 3 b r_1^2 + r_1^3 + 3 a^2 r_2 + 6 a b r_2 + \\
 & 3 b^2 r_2 + 6 a r_1 r_2 + 6 b r_1 r_2 + 3 r_1^2 r_2 + 3 a r_2^2 + 3 b r_2^2 + 3 r_1 r_2^2 + r_2^3) \#1^4 \&, 1], \\
 & \text{Root}[a^4 b m^2 + 3 a^3 b^2 m^2 + 3 a^2 b^3 m^2 + a b^4 m^2 + a^3 m^4 - a^2 b m^4 - a b^2 m^4 + b^3 m^4 + \\
 & 2 a^3 b m^2 r_1 + 3 a^2 b^2 m^2 r_1 - b^4 m^2 r_1 - 2 a^2 b m^3 r_1 + \\
 & 2 b^3 m^3 r_1 + 3 a^2 m^4 r_1 - 6 a b m^4 r_1 + 3 b^2 m^4 r_1 - a^3 m^2 r_1^2 - \\
 & 3 a^2 b m^2 r_1^2 - 6 a b^2 m^2 r_1^2 - 4 b^3 m^2 r_1^2 + 4 a b m^3 r_1^2 + \\
 & 8 b^2 m^3 r_1^2 - a m^4 r_1^2 - b m^4 r_1^2 - 3 a^2 m^2 r_1^3 - 8 a b m^2 r_1^3 - \\
 & 6 b^2 m^2 r_1^3 + 4 a m^3 r_1^3 + 10 b m^3 r_1^3 - 3 m^4 r_1^3 - 3 a m^2 r_1^4 - \\
 & 4 b m^2 r_1^4 + 4 m^3 r_1^4 - m^2 r_1^5 - a^4 m^2 r_2 + 3 a^2 b^2 m^2 r_2 + \\
 & 2 a b^3 m^2 r_2 + 2 a^3 m^3 r_2 - 2 a b^2 m^3 r_2 + 3 a^2 m^4 r_2 - 6 a b m^4 r_2 + \\
 & 3 b^2 m^4 r_2 + a^4 m r_1 r_2 + 4 a^3 b m r_1 r_2 + 6 a^2 b^2 m r_1 r_2 +
 \end{aligned}$$

$$\begin{aligned}
& 4ab^3mr_1r_2 + b^4mr_1r_2 - 6a^3m^2r_1r_2 - 12a^2bm^2r_1r_2 - \\
& 12ab^2m^2r_1r_2 - 6b^3m^2r_1r_2 + 8a^2m^3r_1r_2 + 8abm^3r_1r_2 + \\
& 8b^2m^3r_1r_2 - 2am^4r_1r_2 - 2bm^4r_1r_2 + 4a^3mr_1^2r_2 + \\
& 12a^2bmr_1^2r_2 + 12ab^2mr_1^2r_2 + 4b^3mr_1^2r_2 - 17a^2m^2r_1^2r_2 - \\
& 34abm^2r_1^2r_2 - 20b^2m^2r_1^2r_2 + 18am^3r_1^2r_2 + 24bm^3r_1^2r_2 - \\
& 9m^4r_1^2r_2 + 6a^2mr_1^3r_2 + 12abmr_1^3r_2 + 6b^2mr_1^3r_2 - \\
& 20am^2r_1^3r_2 - 22bm^2r_1^3r_2 + 16m^3r_1^3r_2 + 4amr_1^4r_2 + \\
& 4bmr_1^4r_2 - 8m^2r_1^4r_2 + mr_1^5r_2 - 4a^3m^2r_2^2 - 6a^2bm^2r_2^2 - \\
& 3ab^2m^2r_2^2 - b^3m^2r_2^2 + 8a^2m^3r_2^2 + 4abm^3r_2^2 - am^4r_2^2 - \\
& bm^4r_2^2 + 4a^3mr_1r_2^2 + 12a^2bmr_1r_2^2 + 12ab^2mr_1r_2^2 + \\
& 4b^3mr_1r_2^2 - 20a^2m^2r_1r_2^2 - 34abm^2r_1r_2^2 - 17b^2m^2r_1r_2^2 + \\
& 24am^3r_1r_2^2 + 18bm^3r_1r_2^2 - 9m^4r_1r_2^2 + 12a^2mr_1^2r_2^2 + \\
& 24abmr_1^2r_2^2 + 12b^2mr_1^2r_2^2 - 35am^2r_1^2r_2^2 - \\
& 35bm^2r_1^2r_2^2 + 24m^3r_1^2r_2^2 + 12amr_1^3r_2^2 + 12bmr_1^3r_2^2 - \\
& 19m^2r_1^3r_2^2 + 4mr_1^4r_2^2 - 6a^2m^2r_2^3 - 8abm^2r_2^3 - \\
& 3b^2m^2r_2^3 + 10am^3r_2^3 + 4bm^3r_2^3 - 3m^4r_2^3 + 6a^2mr_1r_2^3 + \\
& 12abmr_1r_2^3 + 6b^2mr_1r_2^3 - 22am^2r_1r_2^3 - 20bm^2r_1r_2^3 + \\
& 16m^3r_1r_2^3 + 12amr_1^2r_2^3 + 12bmr_1^2r_2^3 - 19m^2r_1^2r_2^3 + \\
& 6mr_1^3r_2^3 - 4am^2r_2^4 - 3bm^2r_2^4 + 4m^3r_2^4 + 4amr_1r_2^4 + \\
& 4bmr_1r_2^4 - 8m^2r_1r_2^4 + 4mr_1^2r_2^4 - m^2r_2^5 + mr_1r_2^5 + \\
& (a^5b + 4a^4b^2 + 6a^3b^3 + 4a^2b^4 + ab^5 - a^4bm - 3a^3b^2m - 3a^2b^3m - ab^4m - 2a^4m^2 + 4a^2b^2m^2 - \\
& \quad 2b^4m^2 - a^3m^3 + a^2bm^3 + ab^2m^3 - b^3m^3 + 5a^4br_1 + 16a^3b^2r_1 + 18a^2b^3r_1 + 8ab^4r_1 + b^5r_1 - \\
& \quad 8a^3bmr_1 - 19a^2b^2mr_1 - 14ab^3mr_1 - 3b^4mr_1 - 6a^3m^2r_1 + 2a^2bm^2r_1 + 2ab^2m^2r_1 - \\
& \quad 6b^3m^2r_1 + 3a^2m^3r_1 + 2abm^3r_1 + 3b^2m^3r_1 + 10a^3br_1^2 + 24a^2b^2r_1^2 + 18ab^3r_1^2 + \\
& \quad 4b^4r_1^2 - 18a^2bmr_1^2 - 29ab^2mr_1^2 - 11b^3mr_1^2 - 6a^2m^2r_1^2 + 4abm^2r_1^2 - 2b^2m^2r_1^2 + \\
& \quad 5am^3r_1^2 + 5bm^3r_1^2 + 10a^2br_1^3 + 16ab^2r_1^3 + 6b^3r_1^3 - 16abmr_1^3 - 13b^2mr_1^3 - \\
& \quad 2am^2r_1^3 + 2bm^2r_1^3 + m^3r_1^3 + 5abr_1^4 + 4b^2r_1^4 - 5bmr_1^4 + br_1^5 + a^5r_2 + 8a^4br_2 + \\
& \quad 18a^3b^2r_2 + 16a^2b^3r_2 + 5ab^4r_2 - 3a^4mr_2 - 14a^3bmr_2 - 19a^2b^2mr_2 - 8ab^3mr_2 - \\
& \quad 6a^3m^2r_2 + 2a^2bm^2r_2 + 2ab^2m^2r_2 - 6b^3m^2r_2 + 3a^2m^3r_2 + 2abm^3r_2 + 3b^2m^3r_2 + \\
& \quad 5a^4r_1r_2 + 32a^3br_1r_2 + 54a^2b^2r_1r_2 + 32ab^3r_1r_2 + 5b^4r_1r_2 - 12a^3mr_1r_2 - \\
& \quad 50a^2bmr_1r_2 - 50ab^2mr_1r_2 - 12b^3mr_1r_2 - 8a^2m^2r_1r_2 + 8abm^2r_1r_2 - 8b^2m^2r_1r_2 + \\
& \quad 10am^3r_1r_2 + 10bm^3r_1r_2 + 10a^3r_1^2r_2 + 48a^2b^2r_1^2r_2 + 54ab^2r_1^2r_2 + 16b^3r_1^2r_2 - \\
& \quad 18a^2mr_1^2r_2 - 58abmr_1^2r_2 - 31b^2mr_1^2r_2 - 2am^2r_1^2r_2 + 2bm^2r_1^2r_2 + 3m^3r_1^2r_2 + \\
& \quad 10a^2r_1^3r_2 + 32abr_1^3r_2 + 18b^2r_1^3r_2 - 12amr_1^3r_2 - 22bmr_1^3r_2 + 5ar_1^4r_2 + \\
& \quad 8br_1^4r_2 - 3mr_1^4r_2 + r_1^5r_2 + 4a^4r_2^2 + 18a^3br_2^2 + 24a^2b^2r_2^2 + 10ab^3r_2^2 - \\
& \quad 11a^3mr_2^2 - 29a^2bmr_2^2 - 18ab^2mr_2^2 - 2a^2m^2r_2^2 + 4abm^2r_2^2 - 6b^2m^2r_2^2 + \\
& \quad 5am^3r_2^2 + 5bm^3r_2^2 + 16a^3r_1r_2^2 + 54a^2br_1r_2^2 + 48ab^2r_1r_2^2 + 10b^3r_1r_2^2 - \\
& \quad 31a^2mr_1r_2^2 - 58abmr_1r_2^2 - 18b^2mr_1r_2^2 + 2am^2r_1r_2^2 - 2bm^2r_1r_2^2 + 3m^3r_1r_2^2 + \\
& \quad 24a^2r_1^2r_2^2 + 54abr_1^2r_2^2 + 24b^2r_1^2r_2^2 - 29amr_1^2r_2^2 - 29bmr_1^2r_2^2 + 16ar_1^3r_2^2 + \\
& \quad 18br_1^3r_2^2 - 9mr_1^3r_2^2 + 4r_1^4r_2^2 + 6a^3r_2^3 + 16a^2br_2^3 + 10ab^2r_2^3 - 13a^2mr_2^3 - \\
& \quad 16abmr_2^3 + 2am^2r_2^3 - 2bm^2r_2^3 + m^3r_2^3 + 18a^2r_1r_2^3 + 32abr_1r_2^3 + 10b^2r_1r_2^3 - \\
& \quad 22amr_1r_2^3 - 12bmr_1r_2^3 + 18ar_1^2r_2^3 + 16br_1^2r_2^3 - 9mr_1^2r_2^3 + 6r_1^3r_2^3 + 4a^2r_2^4 + \\
& \quad 5abr_2^4 - 5amr_2^4 + 8ar_1r_2^4 + 5br_1r_2^4 - 3mr_1r_2^4 + 4r_1^2r_2^4 + ar_2^5 + r_1r_2^5) \#1 + \\
& (a^5 + 6a^4b + 13a^3b^2 + 13a^2b^3 + 6ab^4 + b^5 - a^4m - 4a^3bm - 6a^2b^2m - 4ab^3m - b^4m - \\
& \quad 2a^3m^2 - 2a^2bm^2 - 2ab^2m^2 - 2b^3m^2 + 5a^4r_1 + 24a^3br_1 + 39a^2b^2r_1 + 26ab^3r_1 + \\
& \quad 6b^4r_1 - 8a^3mr_1 - 26a^2bmr_1 - 28ab^2mr_1 - 10b^3mr_1 - 2a^2m^2r_1 - 2b^2m^2r_1 + \\
& \quad 10a^3r_1^2 + 36a^2br_1^2 + 39ab^2r_1^2 + 13b^3r_1^2 - 18a^2mr_1^2 - 40abmr_1^2 - 22b^2mr_1^2 + \\
& \quad 6am^2r_1^2 + 6bm^2r_1^2 + 10a^2r_1^3 + 24abr_1^3 + 13b^2r_1^3 - 16amr_1^3 - 18bmr_1^3 + \\
& \quad 6m^2r_1^3 + 5ar_1^4 + 6br_1^4 - 5mr_1^4 + r_1^5 + 6a^4r_2 + 26a^3br_2 + 39a^2b^2r_2 + 24ab^3r_2 + \\
& \quad 5b^4r_2 - 10a^3mr_2 - 28a^2bmr_2 - 26ab^2mr_2 - 8b^3mr_2 - 2a^2m^2r_2 - 2b^2m^2r_2 + \\
& \quad 24a^3r_1r_2 + 78a^2br_1r_2 + 78ab^2r_1r_2 + 24b^3r_1r_2 - 40a^2mr_1r_2 - 80abmr_1r_2 - \\
& \quad 40b^2mr_1r_2 + 12am^2r_1r_2 + 12bm^2r_1r_2 + 36a^2r_1^2r_2 + 78abr_1^2r_2 + 39b^2r_1^2r_2 - \\
& \quad 50amr_1^2r_2 - 52bmr_1^2r_2 + 18m^2r_1^2r_2 + 24ar_1^3r_2 + 26br_1^3r_2 - 20mr_1^3r_2 + \\
& \quad 6r_1^4r_2 + 13a^3r_2^2 + 39a^2br_2^2 + 36ab^2r_2^2 + 10b^3r_2^2 - 22a^2mr_2^2 - 40abmr_2^2 - \\
& \quad 18b^2mr_2^2 + 6am^2r_2^2 + 6bm^2r_2^2 + 39a^2r_1r_2^2 + 78abr_1r_2^2 + 36b^2r_1r_2^2 - 52amr_1r_2^2 - \\
& \quad 50bmr_1r_2^2 + 18m^2r_1r_2^2 + 39ar_1^2r_2^2 + 39br_1^2r_2^2 - 30mr_1^2r_2^2 + 13r_1^3r_2^2 + \\
& \quad 13a^2r_2^3 + 24abr_2^3 + 10b^2r_2^3 - 18amr_2^3 - 16bmr_2^3 + 6m^2r_2^3 + 26ar_1r_2^3 +
\end{aligned}$$

$$\begin{aligned}
& 24 br1 r2^3 - 20 m r1 r2^3 + 13 r1^2 r2^3 + 6 a r2^4 + 5 b r2^4 - 5 m r2^4 + 6 r1 r2^4 + r2^5) \#1^2 + \\
& (2 a^4 + 8 a^3 b + 12 a^2 b^2 + 8 a b^3 + 2 b^4 - a^3 m - 3 a^2 b m - 3 a b^2 m - b^3 m + 8 a^3 r1 + 24 a^2 b r1 + \\
& 24 a b^2 r1 + 8 b^3 r1 - 7 a^2 m r1 - 14 a b m r1 - 7 b^2 m r1 + 12 a^2 r1^2 + 24 a b r1^2 + 12 b^2 r1^2 - \\
& 11 a m r1^2 - 11 b m r1^2 + 8 a r1^3 + 8 b r1^3 - 5 m r1^3 + 2 r1^4 + 8 a^3 r2 + 24 a^2 b r2 + \\
& 24 a b^2 r2 + 8 b^3 r2 - 7 a^2 m r2 - 14 a b m r2 - 7 b^2 m r2 + 24 a^2 r1 r2 + 48 a b r1 r2 + \\
& 24 b^2 r1 r2 - 22 a m r1 r2 - 22 b m r1 r2 + 24 a r1^2 r2 + 24 b r1^2 r2 - 15 m r1^2 r2 + \\
& 8 r1^3 r2 + 12 a^2 r2^2 + 24 a b r2^2 + 12 b^2 r2^2 - 11 a m r2^2 - 11 b m r2^2 + 24 a r1 r2^2 + \\
& 24 b r1 r2^2 - 15 m r1 r2^2 + 12 r1^2 r2^2 + 8 a r2^3 + 8 b r2^3 - 5 m r2^3 + 8 r1 r2^3 + 2 r2^4) \#1^3 + \\
& (a^3 + 3 a^2 b + 3 a b^2 + b^3 + 3 a^2 r1 + 6 a b r1 + 3 b^2 r1 + 3 a r1^2 + 3 b r1^2 + r1^3 + 3 a^2 r2 + 6 a b r2 + \\
& 3 b^2 r2 + 6 a r1 r2 + 6 b r1 r2 + 3 r1^2 r2 + 3 a r2^2 + 3 b r2^2 + 3 r1 r2^2 + r2^3) \#1^4 \& , 2] , \\
\text{Root} [ & a^4 b m^2 + 3 a^3 b^2 m^2 + 3 a^2 b^3 m^2 + a b^4 m^2 + a^3 m^4 - a^2 b m^4 - a b^2 m^4 + b^3 m^4 + \\
& 2 a^3 b m^2 r1 + 3 a^2 b^2 m^2 r1 - b^4 m^2 r1 - 2 a^2 b m^3 r1 + \\
& 2 b^3 m^3 r1 + 3 a^2 m^4 r1 - 6 a b m^4 r1 + 3 b^2 m^4 r1 - a^3 m^2 r1^2 - \\
& 3 a^2 b m^2 r1^2 - 6 a b^2 m^2 r1^2 - 4 b^3 m^2 r1^2 + 4 a b m^3 r1^2 + \\
& 8 b^2 m^3 r1^2 - a m^4 r1^2 - b m^4 r1^2 - 3 a^2 m^2 r1^3 - 8 a b m^2 r1^3 - \\
& 6 b^2 m^2 r1^3 + 4 a m^3 r1^3 + 10 b m^3 r1^3 - 3 m^4 r1^3 - \\
& 3 a m^2 r1^4 - 4 b m^2 r1^4 + 4 m^3 r1^4 - m^2 r1^5 - a^4 m^2 r2 + \\
& 3 a^2 b^2 m^2 r2 + 2 a b^3 m^2 r2 + 2 a^3 m^3 r2 - 2 a b^2 m^3 r2 + \\
& 3 a^2 m^4 r2 - 6 a b m^4 r2 + 3 b^2 m^4 r2 + a^4 m r1 r2 + \\
& 4 a^3 b m r1 r2 + 6 a^2 b^2 m r1 r2 + 4 a b^3 m r1 r2 + b^4 m r1 r2 - \\
& 6 a^3 m^2 r1 r2 - 12 a^2 b m^2 r1 r2 - 12 a b^2 m^2 r1 r2 - \\
& 6 b^3 m^2 r1 r2 + 8 a^2 m^3 r1 r2 + 8 a b m^3 r1 r2 + 8 b^2 m^3 r1 r2 - \\
& 2 a m^4 r1 r2 - 2 b m^4 r1 r2 + 4 a^3 m r1^2 r2 + 12 a^2 b m r1^2 r2 + \\
& 12 a b^2 m r1^2 r2 + 4 b^3 m r1^2 r2 - 17 a^2 m^2 r1^2 r2 - \\
& 34 a b m^2 r1^2 r2 - 20 b^2 m^2 r1^2 r2 + 18 a m^3 r1^2 r2 + \\
& 24 b m^3 r1^2 r2 - 9 m^4 r1^2 r2 + 6 a^2 m r1^3 r2 + 12 a b m r1^3 r2 + \\
& 6 b^2 m r1^3 r2 - 20 a m^2 r1^3 r2 - 22 b m^2 r1^3 r2 + 16 m^3 r1^3 r2 + \\
& 4 a m r1^4 r2 + 4 b m r1^4 r2 - 8 m^2 r1^4 r2 + m r1^5 r2 - \\
& 4 a^3 m^2 r2^2 - 6 a^2 b m^2 r2^2 - 3 a b^2 m^2 r2^2 - b^3 m^2 r2^2 + \\
& 8 a^2 m^3 r2^2 + 4 a b m^3 r2^2 - a m^4 r2^2 - b m^4 r2^2 + 4 a^3 m r1 r2^2 + \\
& 12 a^2 b m r1 r2^2 + 12 a b^2 m r1 r2^2 + 4 b^3 m r1 r2^2 - \\
& 20 a^2 m^2 r1 r2^2 - 34 a b m^2 r1 r2^2 - 17 b^2 m^2 r1 r2^2 + \\
& 24 a m^3 r1 r2^2 + 18 b m^3 r1 r2^2 - 9 m^4 r1 r2^2 + 12 a^2 m r1^2 r2^2 + \\
& 24 a b m r1^2 r2^2 + 12 b^2 m r1^2 r2^2 - 35 a m^2 r1^2 r2^2 - \\
& 35 b m^2 r1^2 r2^2 + 24 m^3 r1^2 r2^2 + 12 a m r1^3 r2^2 + 12 b m r1^3 r2^2 - \\
& 19 m^2 r1^3 r2^2 + 4 m r1^4 r2^2 - 6 a^2 m^2 r2^3 - 8 a b m^2 r2^3 - \\
& 3 b^2 m^2 r2^3 + 10 a m^3 r2^3 + 4 b m^3 r2^3 - 3 m^4 r2^3 + 6 a^2 m r1 r2^3 + \\
& 12 a b m r1 r2^3 + 6 b^2 m r1 r2^3 - 22 a m^2 r1 r2^3 - 20 b m^2 r1 r2^3 + \\
& 16 m^3 r1 r2^3 + 12 a m r1^2 r2^3 + 12 b m r1^2 r2^3 - 19 m^2 r1^2 r2^3 + \\
& 6 m r1^3 r2^3 - 4 a m^2 r2^4 - 3 b m^2 r2^4 + 4 m^3 r2^4 + 4 a m r1 r2^4 + \\
& 4 b m r1 r2^4 - 8 m^2 r1 r2^4 + 4 m r1^2 r2^4 - m^2 r2^5 + m r1 r2^5 + \\
& (a^5 b + 4 a^4 b^2 + 6 a^3 b^3 + 4 a^2 b^4 + a b^5 - a^4 b m - 3 a^3 b^2 m - 3 a^2 b^3 m - a b^4 m - 2 a^4 m^2 + 4 a^2 b^2 m^2 - \\
& 2 b^4 m^2 - a^3 m^3 + a^2 b m^3 + a b^2 m^3 - b^3 m^3 + 5 a^4 b r1 + 16 a^3 b^2 r1 + 18 a^2 b^3 r1 + 8 a b^4 r1 + b^5 r1 - \\
& 8 a^3 b m r1 - 19 a^2 b^2 m r1 - 14 a b^3 m r1 - 3 b^4 m r1 - 6 a^3 m^2 r1 + 2 a^2 b m^2 r1 + 2 a b^2 m^2 r1 - \\
& 6 b^3 m^2 r1 + 3 a^2 m^3 r1 + 2 a b m^3 r1 + 3 b^2 m^3 r1 + 10 a^3 b r1^2 + 24 a^2 b^2 r1^2 + 18 a b^3 r1^2 + \\
& 4 b^4 r1^2 - 18 a^2 b m r1^2 - 29 a b^2 m r1^2 - 11 b^3 m r1^2 - 6 a^2 m^2 r1^2 + 4 a b m^2 r1^2 - 2 b^2 m^2 r1^2 + \\
& 5 a m^3 r1^2 + 5 b m^3 r1^2 + 10 a^2 b r1^3 + 16 a b^2 r1^3 + 6 b^3 r1^3 - 16 a b m r1^3 - 13 b^2 m r1^3 - \\
& 2 a m^2 r1^3 + 2 b m^2 r1^3 + m^3 r1^3 + 5 a b r1^4 + 4 b^2 r1^4 - 5 b m r1^4 + b r1^5 + a^5 r2 + 8 a^4 b r2 + \\
& 18 a^3 b^2 r2 + 16 a^2 b^3 r2 + 5 a b^4 r2 - 3 a^4 m r2 - 14 a^3 b m r2 - 19 a^2 b^2 m r2 - 8 a b^3 m r2 - \\
& 6 a^3 m^2 r2 + 2 a^2 b m^2 r2 + 2 a b^2 m^2 r2 - 6 b^3 m^2 r2 + 3 a^2 m^3 r2 + 2 a b m^3 r2 + 3 b^2 m^3 r2 + \\
& 5 a^4 r1 r2 + 32 a^3 b r1 r2 + 54 a^2 b^2 r1 r2 + 32 a b^3 r1 r2 + 5 b^4 r1 r2 - 12 a^3 m r1 r2 - \\
& 50 a^2 b m r1 r2 - 50 a b^2 m r1 r2 - 12 b^3 m r1 r2 - 8 a^2 m^2 r1 r2 + 8 a b m^2 r1 r2 - 8 b^2 m^2 r1 r2 + \\
& 10 a m^3 r1 r2 + 10 b m^3 r1 r2 + 10 a^3 r1^2 r2 + 48 a^2 b r1^2 r2 + 54 a b^2 r1^2 r2 + 16 b^3 r1^2 r2 - \\
& 18 a^2 m r1^2 r2 - 58 a b m r1^2 r2 - 31 b^2 m r1^2 r2 - 2 a m^2 r1^2 r2 + 2 b m^2 r1^2 r2 + 3 m^3 r1^2 r2 + \\
& 10 a^2 r1^3 r2 + 32 a b r1^3 r2 + 18 b^2 r1^3 r2 - 12 a m r1^3 r2 - 22 b m r1^3 r2 + 5 a r1^4 r2 + \\
& 8 b r1^4 r2 - 3 m r1^4 r2 + r1^5 r2 + 4 a^4 r2^2 + 18 a^3 b r2^2 + 24 a^2 b^2 r2^2 + 10 a b^3 r2^2 - \\
& 11 a^3 m r2^2 - 29 a^2 b m r2^2 - 18 a b^2 m r2^2 - 2 a^2 m^2 r2^2 + 4 a b m^2 r2^2 - 6 b^2 m^2 r2^2 +
\end{aligned}$$

$$\begin{aligned}
& 5 a m^3 r 2^2 + 5 b m^3 r 2^2 + 16 a^3 r 1 r 2^2 + 54 a^2 b r 1 r 2^2 + 48 a b^2 r 1 r 2^2 + 10 b^3 r 1 r 2^2 - \\
& 31 a^2 m r 1 r 2^2 - 58 a b m r 1 r 2^2 - 18 b^2 m r 1 r 2^2 + 2 a m^2 r 1 r 2^2 - 2 b m^2 r 1 r 2^2 + 3 m^3 r 1 r 2^2 + \\
& 24 a^2 r 1^2 r 2^2 + 54 a b r 1^2 r 2^2 + 24 b^2 r 1^2 r 2^2 - 29 a m r 1^2 r 2^2 - 29 b m r 1^2 r 2^2 + 16 a r 1^3 r 2^2 + \\
& 18 b r 1^3 r 2^2 - 9 m r 1^3 r 2^2 + 4 r 1^4 r 2^2 + 6 a^3 r 2^3 + 16 a^2 b r 2^3 + 10 a b^2 r 2^3 - 13 a^2 m r 2^3 - \\
& 16 a b m r 2^3 + 2 a m^2 r 2^3 - 2 b m^2 r 2^3 + m^3 r 2^3 + 18 a^2 r 1 r 2^3 + 32 a b r 1 r 2^3 + 10 b^2 r 1 r 2^3 - \\
& 22 a m r 1 r 2^3 - 12 b m r 1 r 2^3 + 18 a r 1^2 r 2^3 + 16 b r 1^2 r 2^3 - 9 m r 1^2 r 2^3 + 6 r 1^3 r 2^3 + 4 a^2 r 2^4 + \\
& 5 a b r 2^4 - 5 a m r 2^4 + 8 a r 1 r 2^4 + 5 b r 1 r 2^4 - 3 m r 1 r 2^4 + 4 r 1^2 r 2^4 + a r 2^5 + r 1 r 2^5) \#1 + \\
& (a^5 + 6 a^4 b + 13 a^3 b^2 + 13 a^2 b^3 + 6 a b^4 + b^5 - a^4 m - 4 a^3 b m - 6 a^2 b^2 m - 4 a b^3 m - b^4 m - \\
& 2 a^3 m^2 - 2 a^2 b m^2 - 2 a b^2 m^2 - 2 b^3 m^2 + 5 a^4 r 1 + 24 a^3 b r 1 + 39 a^2 b^2 r 1 + 26 a b^3 r 1 + \\
& 6 b^4 r 1 - 8 a^3 m r 1 - 26 a^2 b m r 1 - 28 a b^2 m r 1 - 10 b^3 m r 1 - 2 a^2 m^2 r 1 - 2 b^2 m^2 r 1 + \\
& 10 a^3 r 1^2 + 36 a^2 b r 1^2 + 39 a b^2 r 1^2 + 13 b^3 r 1^2 - 18 a^2 m r 1^2 - 40 a b m r 1^2 - 22 b^2 m r 1^2 + \\
& 6 a m^2 r 1^2 + 6 b m^2 r 1^2 + 10 a^2 r 1^3 + 24 a b r 1^3 + 13 b^2 r 1^3 - 16 a m r 1^3 - 18 b m r 1^3 + \\
& 6 m^2 r 1^3 + 5 a r 1^4 + 6 b r 1^4 - 5 m r 1^4 + r 1^5 + 6 a^4 r 2 + 26 a^3 b r 2 + 39 a^2 b^2 r 2 + 24 a b^3 r 2 + \\
& 5 b^4 r 2 - 10 a^3 m r 2 - 28 a^2 b m r 2 - 26 a b^2 m r 2 - 8 b^3 m r 2 - 2 a^2 m^2 r 2 - 2 b^2 m^2 r 2 + \\
& 24 a^3 r 1 r 2 + 78 a^2 b r 1 r 2 + 78 a b^2 r 1 r 2 + 24 b^3 r 1 r 2 - 40 a^2 m r 1 r 2 - 80 a b m r 1 r 2 - \\
& 40 b^2 m r 1 r 2 + 12 a m^2 r 1 r 2 + 12 b m^2 r 1 r 2 + 36 a^2 r 1^2 r 2 + 78 a b r 1^2 r 2 + 39 b^2 r 1^2 r 2 - \\
& 50 a m r 1^2 r 2 - 52 b m r 1^2 r 2 + 18 m^2 r 1^2 r 2 + 24 a r 1^3 r 2 + 26 b r 1^3 r 2 - 20 m r 1^3 r 2 + \\
& 6 r 1^4 r 2 + 13 a^3 r 2^2 + 39 a^2 b r 2^2 + 36 a b^2 r 2^2 + 10 b^3 r 2^2 - 22 a^2 m r 2^2 - 40 a b m r 2^2 - \\
& 18 b^2 m r 2^2 + 6 a m^2 r 2^2 + 6 b m^2 r 2^2 + 39 a^2 r 1 r 2^2 + 78 a b r 1 r 2^2 + 36 b^2 r 1 r 2^2 - 52 a m r 1 r 2^2 - \\
& 50 b m r 1 r 2^2 + 18 m^2 r 1 r 2^2 + 39 a r 1^2 r 2^2 + 39 b r 1^2 r 2^2 - 30 m r 1^2 r 2^2 + 13 r 1^3 r 2^2 + \\
& 13 a^2 r 2^3 + 24 a b r 2^3 + 10 b^2 r 2^3 - 18 a m r 2^3 - 16 b m r 2^3 + 6 m^2 r 2^3 + 26 a r 1 r 2^3 + \\
& 24 b r 1 r 2^3 - 20 m r 1 r 2^3 + 13 r 1^2 r 2^3 + 6 a r 2^4 + 5 b r 2^4 - 5 m r 2^4 + 6 r 1 r 2^4 + r 2^5) \#1^2 + \\
& (2 a^4 + 8 a^3 b + 12 a^2 b^2 + 8 a b^3 + 2 b^4 - a^3 m - 3 a^2 b m - 3 a b^2 m - b^3 m + 8 a^3 r 1 + 24 a^2 b r 1 + \\
& 24 a b^2 r 1 + 8 b^3 r 1 - 7 a^2 m r 1 - 14 a b m r 1 - 7 b^2 m r 1 + 12 a^2 r 1^2 + 24 a b r 1^2 + 12 b^2 r 1^2 - \\
& 11 a m r 1^2 - 11 b m r 1^2 + 8 a r 1^3 + 8 b r 1^3 - 5 m r 1^3 + 2 r 1^4 + 8 a^3 r 2 + 24 a^2 b r 2 + \\
& 24 a b^2 r 2 + 8 b^3 r 2 - 7 a^2 m r 2 - 14 a b m r 2 - 7 b^2 m r 2 + 24 a^2 r 1 r 2 + 48 a b r 1 r 2 + \\
& 24 b^2 r 1 r 2 - 22 a m r 1 r 2 - 22 b m r 1 r 2 + 24 a r 1^2 r 2 + 24 b r 1^2 r 2 - 15 m r 1^2 r 2 + \\
& 8 r 1^3 r 2 + 12 a^2 r 2^2 + 24 a b r 2^2 + 12 b^2 r 2^2 - 11 a m r 2^2 - 11 b m r 2^2 + 24 a r 1 r 2^2 + \\
& 24 b r 1 r 2^2 - 15 m r 1 r 2^2 + 12 r 1^2 r 2^2 + 8 a r 2^3 + 8 b r 2^3 - 5 m r 2^3 + 8 r 1 r 2^3 + 2 r 2^4) \#1^3 + \\
& (a^3 + 3 a^2 b + 3 a b^2 + b^3 + 3 a^2 r 1 + 6 a b r 1 + 3 b^2 r 1 + 3 a r 1^2 + 3 b r 1^2 + r 1^3 + 3 a^2 r 2 + 6 a b r 2 + \\
& 3 b^2 r 2 + 6 a r 1 r 2 + 6 b r 1 r 2 + 3 r 1^2 r 2 + 3 a r 2^2 + 3 b r 2^2 + 3 r 1 r 2^2 + r 2^3) \#1^4 \&, 3], \\
\text{Root} [ & a^4 b m^2 + 3 a^3 b^2 m^2 + 3 a^2 b^3 m^2 + a b^4 m^2 + a^3 m^4 - a^2 b m^4 - a b^2 m^4 + b^3 m^4 + \\
& 2 a^3 b m^2 r 1 + 3 a^2 b^2 m^2 r 1 - b^4 m^2 r 1 - 2 a^2 b m^3 r 1 + \\
& 2 b^3 m^3 r 1 + 3 a^2 m^4 r 1 - 6 a b m^4 r 1 + 3 b^2 m^4 r 1 - \\
& a^3 m^2 r 1^2 - 3 a^2 b m^2 r 1^2 - 6 a b^2 m^2 r 1^2 - 4 b^3 m^2 r 1^2 + \\
& 4 a b m^3 r 1^2 + 8 b^2 m^3 r 1^2 - a m^4 r 1^2 - b m^4 r 1^2 - \\
& 3 a^2 m^2 r 1^3 - 8 a b m^2 r 1^3 - 6 b^2 m^2 r 1^3 + 4 a m^3 r 1^3 + \\
& 10 b m^3 r 1^3 - 3 m^4 r 1^3 - 3 a m^2 r 1^4 - 4 b m^2 r 1^4 + \\
& 4 m^3 r 1^4 - m^2 r 1^5 - a^4 m^2 r 2 + 3 a^2 b^2 m^2 r 2 + 2 a b^3 m^2 r 2 + \\
& 2 a^3 m^3 r 2 - 2 a b^2 m^3 r 2 + 3 a^2 m^4 r 2 - 6 a b m^4 r 2 + \\
& 3 b^2 m^4 r 2 + a^4 m r 1 r 2 + 4 a^3 b m r 1 r 2 + 6 a^2 b^2 m r 1 r 2 + \\
& 4 a b^3 m r 1 r 2 + b^4 m r 1 r 2 - 6 a^3 m^2 r 1 r 2 - 12 a^2 b m^2 r 1 r 2 - \\
& 12 a b^2 m^2 r 1 r 2 - 6 b^3 m^2 r 1 r 2 + 8 a^2 m^3 r 1 r 2 + \\
& 8 a b m^3 r 1 r 2 + 8 b^2 m^3 r 1 r 2 - 2 a m^4 r 1 r 2 - 2 b m^4 r 1 r 2 + \\
& 4 a^3 m r 1^2 r 2 + 12 a^2 b m r 1^2 r 2 + 12 a b^2 m r 1^2 r 2 + \\
& 4 b^3 m r 1^2 r 2 - 17 a^2 m^2 r 1^2 r 2 - 34 a b m^2 r 1^2 r 2 - \\
& 20 b^2 m^2 r 1^2 r 2 + 18 a m^3 r 1^2 r 2 + 24 b m^3 r 1^2 r 2 - \\
& 9 m^4 r 1^2 r 2 + 6 a^2 m r 1^3 r 2 + 12 a b m r 1^3 r 2 + 6 b^2 m r 1^3 r 2 - \\
& 20 a m^2 r 1^3 r 2 - 22 b m^2 r 1^3 r 2 + 16 m^3 r 1^3 r 2 + 4 a m r 1^4 r 2 + \\
& 4 b m r 1^4 r 2 - 8 m^2 r 1^4 r 2 + m r 1^5 r 2 - 4 a^3 m^2 r 2^2 - \\
& 6 a^2 b m^2 r 2^2 - 3 a b^2 m^2 r 2^2 - b^3 m^2 r 2^2 + 8 a^2 m^3 r 2^2 + \\
& 4 a b m^3 r 2^2 - a m^4 r 2^2 - b m^4 r 2^2 + 4 a^3 m r 1 r 2^2 + \\
& 12 a^2 b m r 1 r 2^2 + 12 a b^2 m r 1 r 2^2 + 4 b^3 m r 1 r 2^2 - \\
& 20 a^2 m^2 r 1 r 2^2 - 34 a b m^2 r 1 r 2^2 - 17 b^2 m^2 r 1 r 2^2 + \\
& 24 a m^3 r 1 r 2^2 + 18 b m^3 r 1 r 2^2 - 9 m^4 r 1 r 2^2 + 12 a^2 m r 1^2 r 2^2 + \\
& 24 a b m r 1^2 r 2^2 + 12 b^2 m r 1^2 r 2^2 - 35 a m^2 r 1^2 r 2^2 -
\end{aligned}$$

$$\begin{aligned}
& 35 b m^2 r_1^2 r_2^2 + 24 m^3 r_1^2 r_2^2 + 12 a m r_1^3 r_2^2 + \\
& 12 b m r_1^3 r_2^2 - 19 m^2 r_1^3 r_2^2 + 4 m r_1^4 r_2^2 - 6 a^2 m^2 r_2^3 - \\
& 8 a b m^2 r_2^3 - 3 b^2 m^2 r_2^3 + 10 a m^3 r_2^3 + 4 b m^3 r_2^3 - \\
& 3 m^4 r_2^3 + 6 a^2 m r_1 r_2^3 + 12 a b m r_1 r_2^3 + 6 b^2 m r_1 r_2^3 - \\
& 22 a m^2 r_1 r_2^3 - 20 b m^2 r_1 r_2^3 + 16 m^3 r_1 r_2^3 + \\
& 12 a m r_1^2 r_2^3 + 12 b m r_1^2 r_2^3 - 19 m^2 r_1^2 r_2^3 + 6 m r_1^3 r_2^3 - \\
& 4 a m^2 r_2^4 - 3 b m^2 r_2^4 + 4 m^3 r_2^4 + 4 a m r_1 r_2^4 + \\
& 4 b m r_1 r_2^4 - 8 m^2 r_1 r_2^4 + 4 m r_1^2 r_2^4 - m^2 r_2^5 + m r_1 r_2^5 + \\
& (a^5 b + 4 a^4 b^2 + 6 a^3 b^3 + 4 a^2 b^4 + a b^5 - a^4 b m - 3 a^3 b^2 m - 3 a^2 b^3 m - a b^4 m - 2 a^4 m^2 + 4 a^2 b^2 m^2 - \\
& \quad 2 b^4 m^2 - a^3 m^3 + a^2 b m^3 + a b^2 m^3 - b^3 m^3 + 5 a^4 b r_1 + 16 a^3 b^2 r_1 + 18 a^2 b^3 r_1 + 8 a b^4 r_1 + b^5 r_1 - \\
& \quad 8 a^3 b m r_1 - 19 a^2 b^2 m r_1 - 14 a b^3 m r_1 - 3 b^4 m r_1 - 6 a^3 m^2 r_1 + 2 a^2 b m^2 r_1 + 2 a b^2 m^2 r_1 - \\
& \quad 6 b^3 m^2 r_1 + 3 a^2 m^3 r_1 + 2 a b m^3 r_1 + 3 b^2 m^3 r_1 + 10 a^3 b r_1^2 + 24 a^2 b^2 r_1^2 + 18 a b^3 r_1^2 + \\
& \quad 4 b^4 r_1^2 - 18 a^2 b m r_1^2 - 29 a b^2 m r_1^2 - 11 b^3 m r_1^2 - 6 a^2 m^2 r_1^2 + 4 a b m^2 r_1^2 - 2 b^2 m^2 r_1^2 + \\
& \quad 5 a m^3 r_1^2 + 5 b m^3 r_1^2 + 10 a^2 b r_1^3 + 16 a b^2 r_1^3 + 6 b^3 r_1^3 - 16 a b m r_1^3 - 13 b^2 m r_1^3 - \\
& \quad 2 a m^2 r_1^3 + 2 b m^2 r_1^3 + m^3 r_1^3 + 5 a b r_1^4 + 4 b^2 r_1^4 - 5 b m r_1^4 + b r_1^5 + a^5 r_2 + 8 a^4 b r_2 + \\
& \quad 18 a^3 b^2 r_2 + 16 a^2 b^3 r_2 + 5 a b^4 r_2 - 3 a^4 m r_2 - 14 a^3 b m r_2 - 19 a^2 b^2 m r_2 - 8 a b^3 m r_2 - \\
& \quad 6 a^3 m^2 r_2 + 2 a^2 b m^2 r_2 + 2 a b^2 m^2 r_2 - 6 b^3 m^2 r_2 + 3 a^2 m^3 r_2 + 2 a b m^3 r_2 + 3 b^2 m^3 r_2 + \\
& \quad 5 a^4 r_1 r_2 + 32 a^3 b r_1 r_2 + 54 a^2 b^2 r_1 r_2 + 32 a b^3 r_1 r_2 + 5 b^4 r_1 r_2 - 12 a^3 m r_1 r_2 - \\
& \quad 50 a^2 b m r_1 r_2 - 50 a b^2 m r_1 r_2 - 12 b^3 m r_1 r_2 - 8 a^2 m^2 r_1 r_2 + 8 a b m^2 r_1 r_2 - 8 b^2 m^2 r_1 r_2 + \\
& \quad 10 a m^3 r_1 r_2 + 10 b m^3 r_1 r_2 + 10 a^3 r_1^2 r_2 + 48 a^2 b r_1^2 r_2 + 54 a b^2 r_1^2 r_2 + 16 b^3 r_1^2 r_2 - \\
& \quad 18 a^2 m r_1^2 r_2 - 58 a b m r_1^2 r_2 - 31 b^2 m r_1^2 r_2 - 2 a m^2 r_1^2 r_2 + 2 b m^2 r_1^2 r_2 + 3 m^3 r_1^2 r_2 + \\
& \quad 10 a^2 r_1^3 r_2 + 32 a b r_1^3 r_2 + 18 b^2 r_1^3 r_2 - 12 a m r_1^3 r_2 - 22 b m r_1^3 r_2 + 5 a r_1^4 r_2 + \\
& \quad 8 b r_1^4 r_2 - 3 m r_1^4 r_2 + r_1^5 r_2 + 4 a^4 r_2^2 + 18 a^3 b r_2^2 + 24 a^2 b^2 r_2^2 + 10 a b^3 r_2^2 - \\
& \quad 11 a^3 m r_2^2 - 29 a^2 b m r_2^2 - 18 a b^2 m r_2^2 - 2 a^2 m^2 r_2^2 + 4 a b m^2 r_2^2 - 6 b^2 m^2 r_2^2 + \\
& \quad 5 a m^3 r_2^2 + 5 b m^3 r_2^2 + 16 a^3 r_1 r_2^2 + 54 a^2 b r_1 r_2^2 + 48 a b^2 r_1 r_2^2 + 10 b^3 r_1 r_2^2 - \\
& \quad 31 a^2 m r_1 r_2^2 - 58 a b m r_1 r_2^2 - 18 b^2 m r_1 r_2^2 + 2 a m^2 r_1 r_2^2 - 2 b m^2 r_1 r_2^2 + 3 m^3 r_1 r_2^2 + \\
& \quad 24 a^2 r_1^2 r_2^2 + 54 a b r_1^2 r_2^2 + 24 b^2 r_1^2 r_2^2 - 29 a m r_1^2 r_2^2 - 29 b m r_1^2 r_2^2 + 16 a r_1^3 r_2^2 + \\
& \quad 18 b r_1^3 r_2^2 - 9 m r_1^3 r_2^2 + 4 r_1^4 r_2^2 + 6 a^3 r_2^3 + 16 a^2 b r_2^3 + 10 a b^2 r_2^3 - 13 a^2 m r_2^3 - \\
& \quad 16 a b m r_2^3 + 2 a m^2 r_2^3 - 2 b m^2 r_2^3 + m^3 r_2^3 + 18 a^2 r_1 r_2^3 + 32 a b r_1 r_2^3 + 10 b^2 r_1 r_2^3 - \\
& \quad 22 a m r_1 r_2^3 - 12 b m r_1 r_2^3 + 18 a r_1^2 r_2^3 + 16 b r_1^2 r_2^3 - 9 m r_1^2 r_2^3 + 6 r_1^3 r_2^3 + 4 a^2 r_2^4 + \\
& \quad 5 a b r_2^4 - 5 a m r_2^4 + 8 a r_1 r_2^4 + 5 b r_1 r_2^4 - 3 m r_1 r_2^4 + 4 r_1^2 r_2^4 + a r_2^5 + r_1 r_2^5) \#1 + \\
& (a^5 + 6 a^4 b + 13 a^3 b^2 + 13 a^2 b^3 + 6 a b^4 + b^5 - a^4 m - 4 a^3 b m - 6 a^2 b^2 m - 4 a b^3 m - b^4 m - \\
& \quad 2 a^3 m^2 - 2 a^2 b m^2 - 2 a b^2 m^2 - 2 b^3 m^2 + 5 a^4 r_1 + 24 a^3 b r_1 + 39 a^2 b^2 r_1 + 26 a b^3 r_1 + \\
& \quad 6 b^4 r_1 - 8 a^3 m r_1 - 26 a^2 b m r_1 - 28 a b^2 m r_1 - 10 b^3 m r_1 - 2 a^2 m^2 r_1 - 2 b^2 m^2 r_1 + \\
& \quad 10 a^3 r_1^2 + 36 a^2 b r_1^2 + 39 a b^2 r_1^2 + 13 b^3 r_1^2 - 18 a^2 m r_1^2 - 40 a b m r_1^2 - 22 b^2 m r_1^2 + \\
& \quad 6 a m^2 r_1^2 + 6 b m^2 r_1^2 + 10 a^2 r_1^3 + 24 a b r_1^3 + 13 b^2 r_1^3 - 16 a m r_1^3 - 18 b m r_1^3 + \\
& \quad 6 m^2 r_1^3 + 5 a r_1^4 + 6 b r_1^4 - 5 m r_1^4 + r_1^5 + 6 a^4 r_2 + 26 a^3 b r_2 + 39 a^2 b^2 r_2 + 24 a b^3 r_2 + \\
& \quad 5 b^4 r_2 - 10 a^3 m r_2 - 28 a^2 b m r_2 - 26 a b^2 m r_2 - 8 b^3 m r_2 - 2 a^2 m^2 r_2 - 2 b^2 m^2 r_2 + \\
& \quad 24 a^3 r_1 r_2 + 78 a^2 b r_1 r_2 + 78 a b^2 r_1 r_2 + 24 b^3 r_1 r_2 - 40 a^2 m r_1 r_2 - 80 a b m r_1 r_2 - \\
& \quad 40 b^2 m r_1 r_2 + 12 a m^2 r_1 r_2 + 12 b m^2 r_1 r_2 + 36 a^2 r_1^2 r_2 + 78 a b r_1^2 r_2 + 39 b^2 r_1^2 r_2 - \\
& \quad 50 a m r_1^2 r_2 - 52 b m r_1^2 r_2 + 18 m^2 r_1^2 r_2 + 24 a r_1^3 r_2 + 26 b r_1^3 r_2 - 20 m r_1^3 r_2 + \\
& \quad 6 r_1^4 r_2 + 13 a^3 r_2^2 + 39 a^2 b r_2^2 + 36 a b^2 r_2^2 + 10 b^3 r_2^2 - 22 a^2 m r_2^2 - 40 a b m r_2^2 - \\
& \quad 18 b^2 m r_2^2 + 6 a m^2 r_2^2 + 6 b m^2 r_2^2 + 39 a^2 r_1 r_2^2 + 78 a b r_1 r_2^2 + 36 b^2 r_1 r_2^2 - 52 a m r_1 r_2^2 - \\
& \quad 50 b m r_1 r_2^2 + 18 m^2 r_1 r_2^2 + 39 a r_1^2 r_2^2 + 39 b r_1^2 r_2^2 - 30 m r_1^2 r_2^2 + 13 r_1^3 r_2^2 + \\
& \quad 13 a^2 r_2^3 + 24 a b r_2^3 + 10 b^2 r_2^3 - 18 a m r_2^3 - 16 b m r_2^3 + 6 m^2 r_2^3 + 26 a r_1 r_2^3 + \\
& \quad 24 b r_1 r_2^3 - 20 m r_1 r_2^3 + 13 r_1^2 r_2^3 + 6 a r_2^4 + 5 b r_2^4 - 5 m r_2^4 + 6 r_1 r_2^4 + r_2^5) \#1 + \\
& (2 a^4 + 8 a^3 b + 12 a^2 b^2 + 8 a b^3 + 2 b^4 - a^3 m - 3 a^2 b m - 3 a b^2 m - b^3 m + 8 a^3 r_1 + 24 a^2 b r_1 + \\
& \quad 24 a b^2 r_1 + 8 b^3 r_1 - 7 a^2 m r_1 - 14 a b m r_1 - 7 b^2 m r_1 + 12 a^2 r_1^2 + 24 a b r_1^2 + 12 b^2 r_1^2 - \\
& \quad 11 a m r_1^2 - 11 b m r_1^2 + 8 a r_1^3 + 8 b r_1^3 - 5 m r_1^3 + 2 r_1^4 + 8 a^3 r_2 + 24 a^2 b r_2 + \\
& \quad 24 a b^2 r_2 + 8 b^3 r_2 - 7 a^2 m r_2 - 14 a b m r_2 - 7 b^2 m r_2 + 24 a^2 r_1 r_2 + 48 a b r_1 r_2 + \\
& \quad 24 b^2 r_1 r_2 - 22 a m r_1 r_2 - 22 b m r_1 r_2 + 24 a r_1^2 r_2 + 24 b r_1^2 r_2 - 15 m r_1^2 r_2 + \\
& \quad 8 r_1^3 r_2 + 12 a^2 r_2^2 + 24 a b r_2^2 + 12 b^2 r_2^2 - 11 a m r_2^2 - 11 b m r_2^2 + 24 a r_1 r_2^2 + \\
& \quad 24 b r_1 r_2^2 - 15 m r_1 r_2^2 + 12 r_1^2 r_2^2 + 8 a r_2^3 + 8 b r_2^3 - 5 m r_2^3 + 8 r_1 r_2^3 + 2 r_2^4) \#1^3 + \\
& (a^3 + 3 a^2 b + 3 a b^2 + b^3 + 3 a^2 r_1 + 6 a b r_1 + 3 b^2 r_1 + 3 a r_1^2 + 3 b r_1^2 + r_1^3 + 3 a^2 r_2 + 6 a b r_2 + \\
& \quad 3 b^2 r_2 + 6 a r_1 r_2 + 6 b r_1 r_2 + 3 r_1^2 r_2 + 3 a r_2^2 + 3 b r_2^2 + 3 r_1 r_2^2 + r_2^3) \#1^4 \&, 4] \}
\end{aligned}$$

```
Simplify[
  Series[Det[JEqNBA2011 - x IdentityMatrix[4] /. x -> -m  $\frac{r1 r2}{(r1 + a) (r2 + b)}$ ], {m, 0, 1}]]
O[m]^2
```

This confirms that eq. (4.29) of BA2011 is consistent with matrix  $J_N$  given in their eq. (4.28).

■ Assuming tight linkage (weak recombination)

The coordinates of the internal equilibrium under the assumption of tight linkage, i.e.  $r \ll \min(a, m)$ , up to and including first-order terms of  $r$ , can be obtained from eq. (4.2) in BA2011.

```
{pEqBA, qEqBA, DABEqBA} // MatrixForm
```

$$\begin{pmatrix} \frac{-a^2+b^2+6 a (r1+r2)-4 m (r1+r2)-(r1+r2)^2+(a-b+r1+r2) \sqrt{-8 m (r1+r2)+(a+b+r1+r2)^2}}{8 a (r1+r2)} \\ \frac{a^2-b^2+6 b (r1+r2)-4 m (r1+r2)-(r1+r2)^2+(-a+b+r1+r2) \sqrt{-8 m (r1+r2)+(a+b+r1+r2)^2}}{8 b (r1+r2)} \\ \frac{-8 m^2 (r1+r2)^2-4 m (r1+r2) (a^2-2 a b+b^2-2 a (r1+r2)-2 b (r1+r2)+(r1+r2)^2)+(a-b-r1-r2) (a+b-r1-r2) (a-b+r1+r2) (a+b+r1+r2-\sqrt{-8 m (r1+r2)})}{32 a b (r1+r2)^2} \end{pmatrix}$$

```
In[129]= pEqWeakRec = FullSimplify[
  Series[pEqBA /. {r1 -> ρ1 ε, r2 -> ρ2 ε}, {ε, 0, 1}] /. {ρ1 -> r1 / ε, ρ2 -> r2 / ε} // Normal,
  Assumptions -> {0 < a < b, 0 < m, 0 < r1, 0 < r2}] // FullSimplify;
qEqWeakRec = FullSimplify[Series[qEqBA /. {r1 -> ρ1 ε, r2 -> ρ2 ε}, {ε, 0, 1}] /.
  {ρ1 -> r1 / ε, ρ2 -> r2 / ε} // Normal,
  Assumptions -> {0 < a < b, 0 < m, 0 < r1, 0 < r2}] // FullSimplify;
DABEqWeakRec = FullSimplify[Series[DABEqBA /. {r1 -> ρ1 ε, r2 -> ρ2 ε}, {ε, 0, 1}] /.
  {ρ1 -> r1 / ε, ρ2 -> r2 / ε} // Normal,
  Assumptions -> {0 < a < b, 0 < m, 0 < r1, 0 < r2}] // FullSimplify;
{pEqWeakRec, qEqWeakRec, DABEqWeakRec} // TableForm
```

$$\begin{pmatrix} \frac{-a^4+a^3(-3b+m)+a^2b(-3b+2m)+b(b-m)m(r1+r2)+a(-b^3+b^2m+bm(r1+r2)+m^2(r1+r2))}{a(a+b)^3} \\ \frac{-a^3b-b^4+b^3m+bm^2(r1+r2)+a^2(-3b^2+bm+m(r1+r2))+a(-3b^3+2b^2m+bm(r1+r2)-m^2(r1+r2))}{b(a+b)^3} \\ \frac{m(a^4b-b^2(b-m)m(r1+r2)+a^3(3b^2-m(r1+r2)-b(m+r1+r2))+a^2(3b^3+bm(r1+r2)+m^2(r1+r2)-2b^2(m+r1+r2))+ab(b^3+bm(r1+r2)-2m^2(r1+r2))}{ab(a+b)^4} \end{pmatrix}$$

Checking these against first-order terms of eq. (4.1) in BA2011:

$$1 - \frac{m}{a+b} - \frac{r m}{(a+b)^2} \left( \frac{b}{a} - \frac{m}{a+b} \left( \frac{b}{a} - 1 \right) \right) - \text{pEqWeakRec} /. \{r \rightarrow r1 + r2\} // \text{FullSimplify}$$

0

$$1 - \frac{m}{a+b} - \frac{r m}{(a+b)^2} \left( \frac{a}{b} + \frac{m}{a+b} \left( 1 - \frac{a}{b} \right) \right) - \text{qEqWeakRec} /. \{r \rightarrow r1 + r2\} // \text{FullSimplify}$$

0

$$\frac{m}{a+b} \left( 1 - \frac{m}{a+b} \right) - \frac{r m}{(a+b)^2} \left( 1 - \frac{m}{a+b} \left( 1 - \frac{m}{a+b} \right) \left( 2 - \frac{b}{a} - \frac{a}{b} \right) \right) - \text{DABEqWeakRec} /. \{r \rightarrow r1 + r2\} // \text{FullSimplify}$$

0

```
In[132]= ruleApplyEqWeakRec :=
  {p -> pEqWeakRec, q -> qEqWeakRec, n -> nC, DAB -> DABEqWeakRec, DAC -> 0, DCB -> 0, DACB -> 0}
```

ruleApplyEqWeakRec

$$\begin{aligned}
 p &\rightarrow -\frac{1}{a(a+b)^3} \left( -a^4 + a^3(-3b+m) + a^2b(-3b+2m) + \right. \\
 &\quad \left. b(b-m)m(r1+r2) + a(-b^3+b^2m+bm(r1+r2)+m^2(r1+r2)) \right), \\
 q &\rightarrow -\frac{1}{b(a+b)^3} \left( -a^3b-b^4+b^3m+bm^2(r1+r2)+a^2(-3b^2+bm+m(r1+r2))+ \right. \\
 &\quad \left. a(-3b^3+2b^2m+bm(r1+r2)-m^2(r1+r2)) \right), \quad n \rightarrow nC, \\
 DAB &\rightarrow \frac{1}{ab(a+b)^4} m \left( a^4b-b^2(b-m)m(r1+r2)+a^3(3b^2-m(r1+r2)-b(m+r1+r2))+ \right. \\
 &\quad a^2(3b^3+bm(r1+r2)+m^2(r1+r2)-2b^2(m+r1+r2))+ \\
 &\quad \left. ab(b^3+bm(r1+r2)-2m^2(r1+r2)-b^2(m+r1+r2)) \right), \quad DAC \rightarrow 0, \quad DCB \rightarrow 0, \quad DACB \rightarrow 0 \}
 \end{aligned}$$

JPrep // MatrixForm

$$\begin{pmatrix}
 a-m-2ap & 0 & b & 0 & 0 & 0 \\
 0 & b-m-2bq & a & 0 & 0 & 0 \\
 -2aDAB+m q & -2bDAB+m p & a+b-m-2ap-2bq-r1-r2 & 0 & 0 & 0 \\
 0 & 0 & 0 & -m & a & b \\
 0 & 0 & 0 & m p & a-m-2ap-r1 & 0 \\
 0 & 0 & 0 & m q & 0 & b-m-2 \\
 0 & 0 & 0 & m(DAB-p q) & -2aDAB+m q & -2bDA
 \end{pmatrix}$$

Now we see the block structure claimed in eq. (4.27) of BA2011.

```
In[133]:= JEqWeakRec = JPrep /. ruleApplyEqWeakRec // FullSimplify;
JEqWeakRec // MatrixForm
```

Out[134]//MatrixForm=

$$\begin{pmatrix}
 a-m+\frac{1}{4} \left( 8a \left( -1+\frac{m}{a+b} \right) + \frac{8m(b(b-m)+a(b+m))(r1+r2)}{(a+b)^3} \right) & 0 \\
 0 & b-m+\frac{1}{4} \left( 8b \left( -1+\frac{m}{a+b} \right) + \frac{8}{a+b} \right) \\
 m \left( b \left( 8-\frac{8m}{a+b} \right) - \frac{8m(a^2+a(b-m)+bm)(r1+r2)}{(a+b)^3} - \frac{16(ab(a+b)^2(a+b-m)-(a^2+a(b-m)+bm)(b(b-m)+a(b+m))(r1+r2))}{(a+b)^4} \right) & m \left( a \left( 8-\frac{8m}{a+b} \right) - \frac{8m(b(b-m)+a(b+m))(r1+r2)}{(a+b)^3} - \frac{16(ab(a+b)^2(a+b-m)-(a^2+a(b-m)+bm)(b(b-m)+a(b+m))(r1+r2))}{(a+b)^4} \right) \\
 8b & 8a \\
 0 & 0 \\
 0 & 0 \\
 0 & 0 \\
 0 & 0
 \end{pmatrix}$$

```
In[135]:= JEqNWeakRec = JEqWeakRec[[{4, 5, 6, 7}, {4, 5, 6, 7}]];
JEqNWeakRec // MatrixForm
```

Out[136]//MatrixForm=

$$\begin{pmatrix}
 -m & a \\
 m \left( a \left( 8-\frac{8m}{a+b} \right) - \frac{8m(b(b-m)+a(b+m))(r1+r2)}{(a+b)^3} \right) & 8a \\
 m \left( b \left( 8-\frac{8m}{a+b} \right) - \frac{8m(a^2+a(b-m)+bm)(r1+r2)}{(a+b)^3} \right) & 8b \\
 m \left( - \left( b \left( 8-\frac{8m}{a+b} \right) - \frac{8m(a^2+a(b-m)+bm)(r1+r2)}{(a+b)^3} \right) \left( a \left( 8-\frac{8m}{a+b} \right) - \frac{8m(b(b-m)+a(b+m))(r1+r2)}{(a+b)^3} \right) + \frac{64m(ab(a+b)^2(a+b-m)-(a^2+a(b-m)+bm)(b(b-m)+a(b+m))(r1+r2))}{(a+b)^4} \right) & m \left( b \left( 8-\frac{8m}{a+b} \right) - \frac{8m(a^2+a(b-m)+bm)(r1+r2)}{(a+b)^3} \right)
 \end{pmatrix}$$

- Using the Ansatz  $m_e = -\lambda_N = m z$

JEqWeakRec



$$\begin{aligned}
& \left\{ \left\{ -\frac{1}{(a+b)^3} (a^4 + a^3 (3b-m) + a^2 b (3b-m) + a (b+m) (b^2 - 2m (r1+r2)) + \right. \right. \\
& \quad \left. \left. bm (b^2 - 2b (r1+r2) + 2m (r1+r2)) \right), 0, b, 0, 0, 0, 0 \right\}, \\
& \left\{ 0, \frac{1}{(a+b)^3} (-b^4 + b^3 m - a^3 (b+m) + 2bm^2 (r1+r2) + a^2 (-3b^2 - bm + 2m (r1+r2)) + \right. \\
& \quad \left. a (-3b^3 + b^2 m + 2bm (r1+r2) - 2m^2 (r1+r2)) \right), a, 0, 0, 0, 0 \right\}, \\
& \left\{ \frac{1}{b (a+b)^4} m (-a^4 b + b^2 (b^3 - b^2 m + 2bm (r1+r2) - 3m^2 (r1+r2)) + \right. \\
& \quad ab (2b^3 - 3bm (r1+r2) + 4m^2 (r1+r2) + b^2 (-m + 2 (r1+r2))) + \\
& \quad a^3 (-2b^2 + m (r1+r2) + b (m + 2 (r1+r2))) + \\
& \quad \left. a^2 (-4bm (r1+r2) - m^2 (r1+r2) + b^2 (m + 4 (r1+r2))) \right), \\
& \frac{1}{a (a+b)^4} m (a^5 + a^4 (2b-m) + b^2 (b-m) m (r1+r2) + a^3 (2m (r1+r2) + b (-m + 2 (r1+r2))) + \\
& \quad ab (-b^3 - 4bm (r1+r2) + 4m^2 (r1+r2) + b^2 (m + 2 (r1+r2))) + \\
& \quad a^2 (-2b^3 - 3bm (r1+r2) - 3m^2 (r1+r2) + b^2 (m + 4 (r1+r2))) \Big), \\
& \left. -\frac{a^2 + b^2 - 2m (r1+r2) + b (-m + r1+r2) + a (2b-m+r1+r2)}{a+b}, 0, \right. \\
& \left. 0, 0, 0 \right\}, \{0, 0, \\
& 0, -m, a, b, 0\}, \\
& \left\{ 0, 0, 0, -\frac{1}{a (a+b)^3} m (-a^4 + a^3 (-3b+m) + a^2 b (-3b+2m) + \right. \\
& \quad \left. b (b-m) m (r1+r2) + a (-b^3 + b^2 m + bm (r1+r2) + m^2 (r1+r2)) \right), \\
& a - m - r1 + \frac{1}{(a+b)^3} 2 (-a^4 + a^3 (-3b+m) + a^2 b (-3b+2m) + b (b-m) m (r1+r2) + \\
& \quad a (-b^3 + b^2 m + bm (r1+r2) + m^2 (r1+r2))) \Big), 0, b \Big\}, \\
& \left\{ 0, 0, 0, -\frac{1}{b (a+b)^3} m (-a^3 b - b^4 + b^3 m + bm^2 (r1+r2) + a^2 (-3b^2 + bm + m (r1+r2)) + \right. \\
& \quad \left. a (-3b^3 + 2b^2 m + bm (r1+r2) - m^2 (r1+r2)) \right), 0, \\
& b - m - r2 + \frac{1}{(a+b)^3} 2 (-a^3 b - b^4 + b^3 m + bm^2 (r1+r2) + a^2 (-3b^2 + bm + m (r1+r2)) + \\
& \quad a (-3b^3 + 2b^2 m + bm (r1+r2) - m^2 (r1+r2))) \Big), a \Big\}, \\
& \left\{ 0, 0, 0, \frac{1}{ab (a+b)^6} m (-(-a^3 b - b^4 + b^3 m + bm^2 (r1+r2) + a^2 (-3b^2 + bm + m (r1+r2)) + \right. \\
& \quad a (-3b^3 + 2b^2 m + bm (r1+r2) - m^2 (r1+r2))) (-a^4 + a^3 (-3b+m) + \\
& \quad a^2 b (-3b+2m) + b (b-m) m (r1+r2) + a (-b^3 + b^2 m + bm (r1+r2) + m^2 (r1+r2))) + \\
& \quad (a+b)^2 m (a^4 b - b^2 (b-m) m (r1+r2) + a^3 (3b^2 - m (r1+r2) - b (m+r1+r2)) + \\
& \quad a^2 (3b^3 + bm (r1+r2) + m^2 (r1+r2) - 2b^2 (m+r1+r2)) + \\
& \quad \left. ab (b^3 + bm (r1+r2) - 2m^2 (r1+r2) - b^2 (m+r1+r2))) \right), \\
& \frac{1}{b (a+b)^4} m (-a^4 b + b^2 (b^3 - b^2 m + 2bm (r1+r2) - 3m^2 (r1+r2)) + \\
& \quad ab (2b^3 - 3bm (r1+r2) + 4m^2 (r1+r2) + b^2 (-m + 2 (r1+r2))) + \\
& \quad a^3 (-2b^2 + m (r1+r2) + b (m + 2 (r1+r2))) + \\
& \quad \left. a^2 (-4bm (r1+r2) - m^2 (r1+r2) + b^2 (m + 4 (r1+r2))) \right), \\
& \frac{1}{a (a+b)^4} m (a^5 + a^4 (2b-m) + b^2 (b-m) m (r1+r2) + a^3 (2m (r1+r2) + b (-m + 2 (r1+r2))) + \\
& \quad ab (-b^3 - 4bm (r1+r2) + 4m^2 (r1+r2) + b^2 (m + 2 (r1+r2))) +
\end{aligned}$$

$$\left. \left. \begin{aligned} & a^2 \left( -2 b^3 - 3 b m (r1 + r2) - 3 m^2 (r1 + r2) + b^2 (m + 4 (r1 + r2)) \right) \right) , \\ & - \frac{a^2 + b^2 - 2 m (r1 + r2) + b (-m + r1 + r2) + a (2 b - m + r1 + r2)}{a + b} \right\} \end{aligned}$$

Applying the same Ansatz as above to the Jacobian obtained from the differential equations yields the following ratio between the effective and actual migration rate,  $\frac{m_e}{m}$ :

**ruleApplyEqWeakRec**

$$\left\{ \begin{aligned} p & \rightarrow - \frac{1}{a (a + b)^3} \left( -a^4 + a^3 (-3 b + m) + a^2 b (-3 b + 2 m) + \right. \\ & \left. b (b - m) m (r1 + r2) + a (-b^3 + b^2 m + b m (r1 + r2) + m^2 (r1 + r2)) \right) , \\ q & \rightarrow - \frac{1}{b (a + b)^3} \left( -a^3 b - b^4 + b^3 m + b m^2 (r1 + r2) + a^2 (-3 b^2 + b m + m (r1 + r2)) + \right. \\ & \left. a (-3 b^3 + 2 b^2 m + b m (r1 + r2) - m^2 (r1 + r2)) \right) , \quad n \rightarrow nC, \\ DAB & \rightarrow \frac{1}{a b (a + b)^4} m \left( a^4 b - b^2 (b - m) m (r1 + r2) + a^3 (3 b^2 - m (r1 + r2) - b (m + r1 + r2)) + \right. \\ & \left. a^2 (3 b^3 + b m (r1 + r2) + m^2 (r1 + r2) - 2 b^2 (m + r1 + r2)) + \right. \\ & \left. a b (b^3 + b m (r1 + r2) - 2 m^2 (r1 + r2) - b^2 (m + r1 + r2)) \right) , \quad DAC \rightarrow 0, \quad DCB \rightarrow 0, \quad DACB \rightarrow 0 \end{aligned} \right\}$$

**Simplify[**

```
Series[Det[(JEqWeakRec /. ruleApplyEqWeakRec) - x IdentityMatrix[7] /. x -> -m z],
{m, 0, 1}], Assumptions -> {a >= 0, b >= 0, r1 >= 0, r2 >= 0}] // Normal
```

```
a b m (a + b + r1 + r2)^2 (a (b + r2) z + r1 (r2 (-1 + z) + b z))
```

**Simplify[Solve[% == 0, z]]**

$$\left\{ \left\{ z \rightarrow \frac{r1 r2}{(a + r1) (b + r2)} \right\} \right\}$$

Hence, we see that the effective migration rate does not only apply for weak migration, but also for weak recombination.

## ■ Graphical exploration of approximation

### ■ Generic

We compare the approximate effective migration rate to the exact (negative) eigenvalue of  $J_N$  computed numerically.

In[137]=

```
approxEffMigRateACBFunc[a_, b_, m_, r1_, r2_] := m  $\left( \frac{r1}{a + r1} \right) \left( \frac{r2}{b + r2} \right)$ 
```

In[138]=

```
exactEffMigRateACBFunc[a_, b_, m_, r1_, r2_] := Module[{JN}, JN = {-m, a, b, 0}, {  $\frac{1}{8 a (r1 + r2)} m$  (-i
Return[-Max[Re[Eigenvalues[JN]]]]
]
```

```
mya = 0.002;
```

```
myb = 0.4;
```

```
mym = 0.0024;
```

```
myr1 = 0.01 * (10);
```

```
myr2 = 0.01 * (30);
```

```
{exactEffMigRateACBFunc[mya, myb, mym, myr1, myr2],
approxEffMigRateACBFunc[mya, myb, mym, myr1, myr2],
approxEffMigRateACBFunc[mya, myb, mym, myr1, myr2] /
exactEffMigRateACBFunc[mya, myb, mym, myr1, myr2] - 1}
```

```
{0.00102183, 0.0010084, -0.0131391}
```

The exact (blue) and approximate (red) effective migration rate:

```
Manipulate[Plot[{exactEffMigRateACBFunc[mya, myb, m, myr1, myr2],
  approxEffMigRateACBFunc[mya, myb, m, myr1, myr2]}, {m, 0, .1},
  Frame → True, FrameStyle → Table[{Black, Opacity[0]}, {i, 1, 2}],
  FrameLabel → {"Migration rate m", "Effective mig. rate"},
  LabelStyle → {Directive[FontSize → 14], FontFamily → "Helvetica"}],
  {{mya, 0.02}, 0, 1}, {{myb, 0.4}, 0, 1}, {{myr1, 0.02}, 0, 1}, {{myr2, 0.02}, 0, 1}]
```

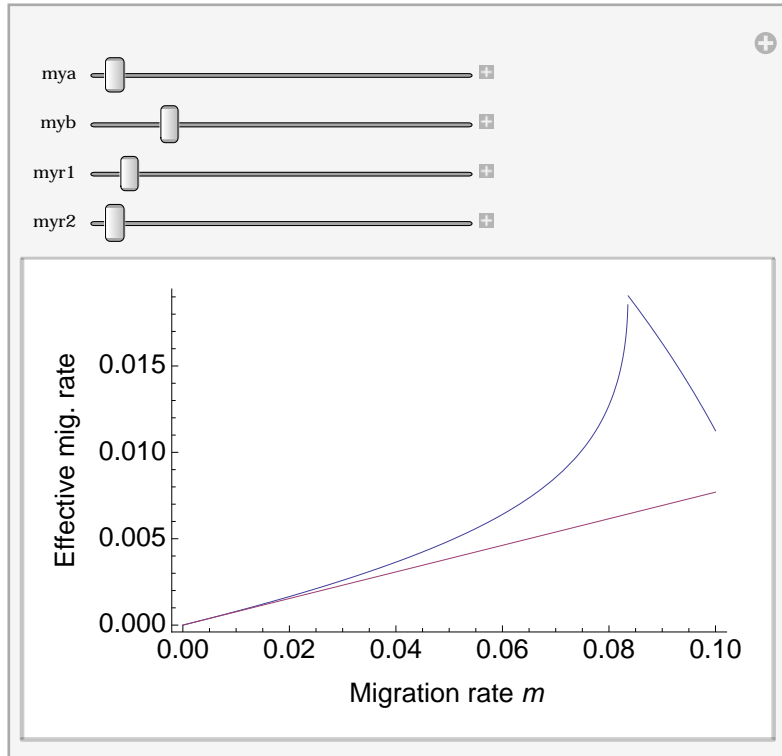

## Order of loci: $\mathcal{A}\text{-}\mathcal{B}\text{-}\mathcal{C}$

We note that the definitions given in equations (1) to (37) above remain unchanged. The algorithm for the construction of difference equations under recombination also remains the same.

$$D_{ABC} = y_1 - p q n - p D_{CB} - q D_{AC} - n D_{AB} = y_1 - p q n - p [(y_1 + y_3) - q n] - q [(y_1 + y_2) - p n] - n [(y_1 + y_5) - p q] \quad (1)$$

### ■ Deriving the difference equations under recombination

```
In[139]:= gametes2 = {{A1, B1, C1}, {A1, B2, C1}, {A2, B1, C1},
  {A2, B2, C1}, {A1, B1, C2}, {A1, B2, C2}, {A2, B1, C2}, {A2, B2, C2}}
Out[139]:= {{A1, B1, C1}, {A1, B2, C1}, {A2, B1, C1}, {A2, B2, C1},
  {A1, B1, C2}, {A1, B2, C2}, {A2, B1, C2}, {A2, B2, C2}}
```

```

matings2 = Flatten[Table[{gametes2[[i]], gametes2[[j]],
  {i, 1, Length[gametes2]}, {j, 1, Length[gametes2]}], 1]
Length[
  %]
{{{A1, B1, C1}, {A1, B1, C1}}, {{A1, B1, C1}, {A1, B2, C1}},
  {{A1, B1, C1}, {A2, B1, C1}}, {{A1, B1, C1}, {A2, B2, C1}},
  {{A1, B1, C1}, {A1, B1, C2}}, {{A1, B1, C1}, {A1, B2, C2}}, {{A1, B1, C1}, {A2, B1, C2}},
  {{A1, B1, C1}, {A2, B2, C2}}, {{A1, B2, C1}, {A1, B1, C1}}, {{A1, B2, C1}, {A1, B2, C1}},
  {{A1, B2, C1}, {A2, B1, C1}}, {{A1, B2, C1}, {A2, B2, C1}}, {{A1, B2, C1}, {A1, B1, C2}},
  {{A1, B2, C1}, {A1, B2, C2}}, {{A1, B2, C1}, {A2, B1, C2}}, {{A1, B2, C1}, {A2, B2, C2}},
  {{A2, B1, C1}, {A1, B1, C1}}, {{A2, B1, C1}, {A1, B2, C1}}, {{A2, B1, C1}, {A2, B1, C1}},
  {{A2, B1, C1}, {A2, B2, C1}}, {{A2, B1, C1}, {A1, B1, C2}}, {{A2, B1, C1}, {A1, B2, C2}},
  {{A2, B1, C1}, {A2, B1, C2}}, {{A2, B1, C1}, {A2, B2, C2}}, {{A2, B2, C1}, {A1, B1, C1}},
  {{A2, B2, C1}, {A1, B2, C1}}, {{A2, B2, C1}, {A2, B1, C1}}, {{A2, B2, C1}, {A2, B2, C1}},
  {{A2, B2, C1}, {A1, B1, C2}}, {{A2, B2, C1}, {A1, B2, C2}}, {{A2, B2, C1}, {A2, B1, C2}},
  {{A2, B2, C1}, {A2, B2, C2}}, {{A1, B1, C2}, {A1, B1, C1}}, {{A1, B1, C2}, {A1, B2, C1}},
  {{A1, B1, C2}, {A2, B1, C1}}, {{A1, B1, C2}, {A2, B2, C1}}, {{A1, B1, C2}, {A1, B1, C2}},
  {{A1, B1, C2}, {A1, B2, C2}}, {{A1, B1, C2}, {A2, B1, C2}}, {{A1, B1, C2}, {A2, B2, C2}},
  {{A1, B2, C2}, {A1, B1, C1}}, {{A1, B2, C2}, {A1, B2, C1}}, {{A1, B2, C2}, {A2, B1, C1}},
  {{A1, B2, C2}, {A2, B2, C1}}, {{A1, B2, C2}, {A1, B1, C2}}, {{A1, B2, C2}, {A1, B2, C2}},
  {{A1, B2, C2}, {A2, B1, C2}}, {{A1, B2, C2}, {A2, B2, C2}}, {{A2, B1, C2}, {A1, B1, C1}},
  {{A2, B1, C2}, {A1, B2, C1}}, {{A2, B1, C2}, {A1, B2, C2}}, {{A2, B1, C2}, {A2, B1, C1}},
  {{A2, B1, C2}, {A2, B2, C1}}, {{A2, B1, C2}, {A2, B2, C2}}, {{A2, B1, C2}, {A1, B1, C2}},
  {{A2, B1, C2}, {A1, B2, C2}}, {{A2, B1, C2}, {A2, B1, C2}}, {{A2, B1, C2}, {A2, B1, C2}},
  {{A2, B1, C2}, {A2, B2, C2}}, {{A2, B2, C2}, {A1, B1, C1}}, {{A2, B2, C2}, {A1, B2, C1}},
  {{A2, B2, C2}, {A2, B1, C1}}, {{A2, B2, C2}, {A2, B2, C1}}, {{A2, B2, C2}, {A1, B1, C2}},
  {{A2, B2, C2}, {A1, B2, C2}}, {{A2, B2, C2}, {A2, B1, C2}}, {{A2, B2, C2}, {A2, B2, C2}}
}
64

```

The gamete frequencies remain the same, as we have defined the list 'gametes2' appropriately:

```

{gametes2, gameteFreqs} // TableForm

```

|    |    |    |    |    |    |    |    |
|----|----|----|----|----|----|----|----|
| A1 | A1 | A2 | A2 | A1 | A1 | A2 | A2 |
| B1 | B2 | B1 | B2 | B1 | B2 | B1 | B2 |
| C1 | C1 | C1 | C1 | C2 | C2 | C2 | C2 |
| y1 | y2 | y3 | y4 | y5 | y6 | y7 | y8 |

Obviously, then, the pairs of frequencies applying to the matings remain the same, too:

```

{matings2, freqPairs} // TableForm

```

|          |          |          |          |          |          |          |          |   |
|----------|----------|----------|----------|----------|----------|----------|----------|---|
| A1 B1 C1 | : |
| A1 B1 C1 | A1 B2 C1 | A2 B1 C1 | A2 B2 C1 | A1 B1 C2 | A1 B2 C2 | A2 B1 C2 | A2 B1 C2 | : |
| y1       | : |
| y1       | y2       | y3       | y4       | y5       | y6       | y7       | y7       | : |

```

MapThread[gametesProduced[#1[[1]], #1[[2]], #2[[1]], #2[[2]]] &,
  {matings2[[1 ;; 2]], freqPairs[[1 ;; 2]]} // TableForm

```

|          |                                                                                                                                 |
|----------|---------------------------------------------------------------------------------------------------------------------------------|
| A1 B1 C1 | $(1 - r1) (1 - r2) y1^2 + r1 (1 - r2) y1^2 + (1 - r1) r2 y1^2 + r1 r2 y1^2$                                                     |
| A1 B1 C1 | $\frac{1}{2} (1 - r1) (1 - r2) y1 y2 + \frac{1}{2} r1 (1 - r2) y1 y2 + \frac{1}{2} (1 - r1) r2 y1 y2 + \frac{1}{2} r1 r2 y1 y2$ |
| A1 B2 C1 | $\frac{1}{2} (1 - r1) (1 - r2) y1 y2 + \frac{1}{2} r1 (1 - r2) y1 y2 + \frac{1}{2} (1 - r1) r2 y1 y2 + \frac{1}{2} r1 r2 y1 y2$ |

```
In[140]:= recSep2 =
  MapThread[gametesProduced[#1[[1]], #1[[2]], #2[[1]], #2[[2]]] &, {matings2, freqPairs};
  TableForm[recSep2]

MapThread::mptd : Object matings2 at position {2, 1} in
  MapThread[gametesProduced[#1[[1]], #1[[2]], #2[[1]], #2[[2]]] &, {matings2, {{y1, y1}, {y1, y2}, {y1, y3}, {y1, y4},
    {y1, y5}, {y1, y6}, {y1, y7}, {y1, y8}, {y2, y1}, {y2, y2}, {y2, y3}, {y2, y4}, {y2, y5}, {y2, y6}, {y2, y7}, {y2, y8},
    {y3, y1}, {y3, y2}, {y3, y3}, {y3, y4}, <<12>>, {y5, y1}, {y5, y2}, {y5, y3}, {y5, y4}, {y5, y5}, {y5, y6}, {y5, y7},
    {y5, y8}, {y6, y1}, {y6, y2}, {y6, y3}, {y6, y4}, {y6, y5}, {y6, y6}, {y6, y7}, {y6, y8}, {y7, y1}, {y7, y2}, <<14>>}}
] has only 0 of required 1 dimensions. >>

MapThread::mptd : Object matings2 at position {2, 1} in
  MapThread[gametesProduced[#1[[1]], #1[[2]], #2[[1]], #2[[2]]] &, {matings2, {{y1, y1}, {y1, y2}, {y1, y3}, {y1, y4},
    {y1, y5}, {y1, y6}, {y1, y7}, {y1, y8}, {y2, y1}, {y2, y2}, {y2, y3}, {y2, y4}, {y2, y5}, {y2, y6}, {y2, y7}, {y2, y8},
    {y3, y1}, {y3, y2}, {y3, y3}, {y3, y4}, <<12>>, {y5, y1}, {y5, y2}, {y5, y3}, {y5, y4}, {y5, y5}, {y5, y6}, {y5, y7},
    {y5, y8}, {y6, y1}, {y6, y2}, {y6, y3}, {y6, y4}, {y6, y5}, {y6, y6}, {y6, y7}, {y6, y8}, {y7, y1}, {y7, y2}, <<14>>}}
] has only 0 of required 1 dimensions. >>
```

Out[141]/TableForm=

```
MapThread[gametesProduced[#1[[1]], #1[[2]], #2[[1]], #2[[2]]] &,
  {matings2, {{y1, y1}, {y1, y2}, {y1, y3}, {y1, y4}, {y1, y5}, {y1, y6}, {y1, y7}, {y1, y8},
    {y2, y1}, {y2, y2}, {y2, y3}, {y2, y4}, {y2, y5}, {y2, y6}, {y2, y7}, {y2, y8},
    {y3, y1}, {y3, y2}, {y3, y3}, {y3, y4}, {y3, y5}, {y3, y6}, {y3, y7}, {y3, y8},
    {y4, y1}, {y4, y2}, {y4, y3}, {y4, y4}, {y4, y5}, {y4, y6}, {y4, y7}, {y4, y8},
    {y5, y1}, {y5, y2}, {y5, y3}, {y5, y4}, {y5, y5}, {y5, y6}, {y5, y7}, {y5, y8},
    {y6, y1}, {y6, y2}, {y6, y3}, {y6, y4}, {y6, y5}, {y6, y6}, {y6, y7}, {y6, y8},
    {y7, y1}, {y7, y2}, {y7, y3}, {y7, y4}, {y7, y5}, {y7, y6}, {y7, y7}, {y7, y8},
    {y8, y1}, {y8, y2}, {y8, y3}, {y8, y4}, {y8, y5}, {y8, y6}, {y8, y7}, {y8, y8}}}]

indices2 = Table[Position[recSep2[[i, 1]], gametes2[[2]]], {i, Length[recSep2]}]

{{{}, {{2}}, {}, {{2}}, {}, {{3}}, {}, {{3}}, {{2}}, {{1}}, {{2}}, {{1}}, {{3}}, {{1}},
  {{3}}, {{1}}, {}, {{2}}, {}, {}, {}, {{3}}, {}, {}, {{2}}, {{1}}, {}, {}, {{3}},
  {{1}}, {}, {}, {{3}}, {}, {{3}}, {}, {}, {}, {{3}}, {{1}}, {{3}}, {{1}}, {},
  {}, {}, {}, {{3}}, {}, {}, {}, {}, {}, {}, {{3}}, {{1}}, {}, {}, {}, {}, {}}}

Flatten[Table[Part[recSep2, i, 2][Flatten[indices2[[i]]]], {i, Length[indices2]}] //
  Total // FullSimplify

y2 + r1 y4 y5 - r1 r2 y4 y5 + r2 y3 y6 - r1 r2 y3 y6 + r1 y4 y6 + r2 y4 y6 - 2 r1 r2 y4 y6 +
  y2 (y3 - r1 y3 + y4 + y5 - r2 y5 + y6 + y7 + r1 (-1 + r2) y7 + y8 + r1 (-1 + 2 r2) y8 - r2 (y7 + y8)) +
  y1 (y2 + r2 y6 + r1 (y4 + r2 y8))
```

## ■ Differential equations under recombination

### ■ In terms of gamete frequencies

```
recTilde1 = sumPerOffspringGamete[gametes2, 1, recSep2] // FullSimplify

y12 + r2 (y2 + y3 + y4) y5 + r1 (-r2 y4 y5 + y3 (y5 - 2 r2 y5 + y6 - r2 y6) + y2 (y3 + r2 y7)) +
  y1 (y2 + y3 + y4 - r1 y4 + y5 + y6 - r2 y6 + y7 + r1 (-1 + 2 r2) y7 + y8 + r1 (-1 + r2) y8 - r2 (y7 + y8))
```

The corresponding continuous-time differential equation:

```
yTilde1D =
  FullSimplify[Series[recTilde1 - y1 /. recScale, {ε, 0, 1}] /. recBackScale // Normal]

y12 + r2 (y2 + y3 + y4) y5 + r1 y3 (y2 + y5 + y6) +
  y1 (-1 + y2 + y3 + y4 - r1 y4 + y5 + y6 - r2 y6 + y7 + y8 - (r1 + r2) (y7 + y8))

Collect[yTilde1D, {r1, r2}]

-y1 + y12 + y1 y2 + y1 y3 + y1 y4 + y1 y5 + y1 y6 + y1 y7 + y1 y8 +
  r2 ((y2 + y3 + y4) y5 - y1 y6 - y1 (y7 + y8)) + r1 (-y1 y4 + y3 (y2 + y5 + y6) - y1 (y7 + y8))

FullSimplify[(-y1 + y12 + y1 y2 + y1 y3 + y1 y4 + y1 y5 + y1 y6 + y1 y7 + y1 y8),
  Assumptions → {y8 == 1 - y1 - y2 - y3 - y4 - y5 - y6 - y7, y1 + y2 + y3 + y4 + y5 + y6 + y7 + y8 == 1}]
```

0

We note that 'yTilde1D' can be simplified to

```
In[142]:=
yTilde1DotRec := -r1 (y1 (1 - p) - y3 p) - r2 (y1 (1 - n) - y5 n)

yTilde1DotRec - yTilde1D /. {p → y1 + y2 + y5 + y6, q → y1 + y3 + y5 + y7, n → y1 + y2 + y3 + y4} //.
{y1 → 1 - (y2 + y3 + y4 + y5 + y6 + y7 + y8)} // Simplify

0

recTilde2 = sumPerOffspringGamete[gametes2, 2, recSep2] // FullSimplify

y22 + r1 y4 y5 - r1 r2 y4 y5 + r2 y3 y6 - r1 r2 y3 y6 + r1 y4 y6 + r2 y4 y6 - 2 r1 r2 y4 y6 +
y2 (y3 - r1 y3 + y4 + y5 - r2 y5 + y6 + y7 + r1 (-1 + r2) y7 + y8 + r1 (-1 + 2 r2) y8 - r2 (y7 + y8)) +
y1 (y2 + r2 y6 + r1 (y4 + r2 y8))

yTilde2D =
FullSimplify[Series[recTilde2 - y2 /. recScale, {ε, 0, 1}] /. recBackScale // Normal]

y22 + r2 (y1 + y3 + y4) y6 + r1 y4 (y1 + y5 + y6) +
y2 (-1 + y1 + y3 - r1 y3 + y4 + y5 - r2 y5 + y6 + y7 + y8 - (r1 + r2) (y7 + y8))

Collect[yTilde2D, {r1, r2}]

-y2 + y1 y2 + y22 + y2 y3 + y2 y4 + y2 y5 + y2 y6 + y2 y7 + y2 y8 +
r2 (-y2 y5 + (y1 + y3 + y4) y6 - y2 (y7 + y8)) + r1 (-y2 y3 + y4 (y1 + y5 + y6) - y2 (y7 + y8))

FullSimplify[(-y2 + y1 y2 + y22 + y2 y3 + y2 y4 + y2 y5 + y2 y6 + y2 y7 + y2 y8),
Assumptions → {y8 = 1 - y1 - y2 - y3 - y4 - y5 - y6 - y7, y1 + y2 + y3 + y4 + y5 + y6 + y7 + y8 = 1}]

0
```

We note that 'yTilde2D' can be simplified to

```
In[143]:=
yTilde2DotRec := -r1 (y2 (1 - p) - y4 p) - r2 (y2 (1 - n) - y6 n)

yTilde2DotRec - yTilde2D /. {p → y1 + y2 + y5 + y6, q → y1 + y3 + y5 + y7, n → y1 + y2 + y3 + y4} //.
{y1 → 1 - (y2 + y3 + y4 + y5 + y6 + y7 + y8)} // Simplify

0

recTilde3 = sumPerOffspringGamete[gametes2, 3, recSep2] // FullSimplify

y32 + y3 y4 + y3 y5 - r1 y3 y5 - r2 y3 y5 + 2 r1 r2 y3 y5 + r1 r2 y4 y5 + y3 y6 -
r1 y3 y6 - r2 y3 y6 + r1 r2 y3 y6 + y3 y7 + r2 y4 y7 - (-1 + r1) y2 (y3 + r2 y7) +
y3 y8 - r2 y3 y8 + y1 (y3 + r2 y7 + r1 (y4 + y7 - 2 r2 y7 + y8 - r2 y8))

yTilde3D =
FullSimplify[Series[recTilde3 - y3 /. recScale, {ε, 0, 1}] /. recBackScale // Normal]

y32 + r2 (y1 + y2 + y4) y7 + r1 y1 (y4 + y7 + y8) +
y3 (-1 + y1 + y2 - r1 y2 + y4 + y5 + y6 - (r1 + r2) (y5 + y6) + y7 + y8 - r2 y8)

Collect[yTilde3D, {r1, r2}]

-y3 + y1 y3 + y2 y3 + y32 + y3 y4 + y3 y5 + y3 y6 + y3 y7 + y3 y8 +
r2 (-y3 (y5 + y6) + (y1 + y2 + y4) y7 - y3 y8) + r1 (-y2 y3 - y3 (y5 + y6) + y1 (y4 + y7 + y8))

FullSimplify[(-y3 + y1 y3 + y2 y3 + y32 + y3 y4 + y3 y5 + y3 y6 + y3 y7 + y3 y8),
Assumptions → {y8 = 1 - y1 - y2 - y3 - y4 - y5 - y6 - y7, y1 + y2 + y3 + y4 + y5 + y6 + y7 + y8 = 1}]

0
```

We note that 'yTilde3D' can be simplified to

```
In[144]:=
yTilde3DotRec := -r1 (y3 p - y1 (1 - p)) - r2 (y3 (1 - n) - y7 n)

yTilde3DotRec - yTilde3D /. {p → y1 + y2 + y5 + y6, q → y1 + y3 + y5 + y7, n → y1 + y2 + y3 + y4} //.
{y1 → 1 - (y2 + y3 + y4 + y5 + y6 + y7 + y8)} // Simplify

0
```

```

recTilde4 = sumPerOffspringGamete[gametes2, 4, recSep2] // FullSimplify
y4 (y1 + y2 + y3 + y4 - (-1 + r2) (y5 + y6 + y7)) + (r2 (y1 + y2 + y3) + y4) y8 +
  r1 ((-1 + r2) y4 y5 + (r2 y3 - y4 + 2 r2 y4) y6 + y2 (y3 + y7 - r2 y7 + y8 - 2 r2 y8) - y1 (y4 + r2 y8))
yTilde4D =
  FullSimplify[Series[recTilde4 - y4 /. recScale, {ε, 0, 1}] /. recBackScale // Normal]
(-1 + y1) y4 + y4 (y2 + y3 + y4 - (-1 + r2) (y5 + y6 + y7)) +
  (r2 (y1 + y2 + y3) + y4) y8 + r1 (-y4 (y1 + y5 + y6) + y2 (y3 + y7 + y8))
Collect[yTilde4D, {r1, r2}]
(-1 + y1) y4 + y2 y4 + y3 y4 + y42 + y4 y5 + y4 y6 + y4 y7 + y4 y8 +
  r2 (-y4 (y5 + y6 + y7) + (y1 + y2 + y3) y8) + r1 (-y4 (y1 + y5 + y6) + y2 (y3 + y7 + y8))
FullSimplify[(-1 + y1) y4 + y2 y4 + y3 y4 + y42 + y4 y5 + y4 y6 + y4 y7 + y4 y8),
  Assumptions → {y8 == 1 - y1 - y2 - y3 - y4 - y5 - y6 - y7, y1 + y2 + y3 + y4 + y5 + y6 + y7 + y8 == 1}]
0

```

We note that 'yTilde4D' can be simplified to

```

In[145]:= yTilde4DotRec := -r1 (y4 p - y2 (1 - p)) - r2 (y4 (1 - n) - y8 n)
yTilde4DotRec - yTilde4D /. {p → y1 + y2 + y5 + y6, q → y1 + y3 + y5 + y7, n → y1 + y2 + y3 + y4} //.
  {y1 → 1 - (y2 + y3 + y4 + y5 + y6 + y7 + y8)} // Simplify
0

```

```

recTilde5 = sumPerOffspringGamete[gametes2, 5, recSep2] // FullSimplify
y3 y5 - r1 y3 y5 - r2 y3 y5 + 2 r1 r2 y3 y5 + y4 y5 - r1 y4 y5 - r2 y4 y5 +
  r1 r2 y4 y5 + y52 + r1 r2 y3 y6 + y5 y6 + y5 y7 + r1 y6 y7 - (-1 + r2) y2 (y5 + r1 y7) +
  y5 y8 - r1 y5 y8 + y1 (y5 + r1 y7 + r2 (y6 + y7 - 2 r1 y7 + y8 - r1 y8))
yTilde5D =
  FullSimplify[Series[recTilde5 - y5 /. recScale, {ε, 0, 1}] /. recBackScale // Normal]
y52 + r1 (y1 + y2 + y6) y7 + r2 y1 (y6 + y7 + y8) +
  y5 (-1 + y1 + y2 - r2 y2 + y3 - r1 y3 + y4 - r2 (y3 + y4) + y6 + y7 + y8 - r1 (y4 + y8))
Collect[yTilde5D, {r1, r2}]
-y5 + y1 y5 + y2 y5 + y3 y5 + y4 y5 + y52 + y5 y6 + y5 y7 + y5 y8 +
  r1 (-y3 y5 + (y1 + y2 + y6) y7 - y5 (y4 + y8)) + r2 (-y2 y5 + (-y3 - y4) y5 + y1 (y6 + y7 + y8))
FullSimplify[(-y5 + y1 y5 + y2 y5 + y3 y5 + y4 y5 + y52 + y5 y6 + y5 y7 + y5 y8),
  Assumptions → {y8 == 1 - y1 - y2 - y3 - y4 - y5 - y6 - y7, y1 + y2 + y3 + y4 + y5 + y6 + y7 + y8 == 1}]
0

```

We note that 'yTilde5D' can be simplified to

```

In[146]:= yTilde5DotRec := -r1 (y5 (1 - p) - y7 p) - r2 (y5 n - y1 (1 - n))
yTilde5DotRec - yTilde5D /. {p → y1 + y2 + y5 + y6, q → y1 + y3 + y5 + y7, n → y1 + y2 + y3 + y4} //.
  {y1 → 1 - (y2 + y3 + y4 + y5 + y6 + y7 + y8)} // Simplify
0

```

```

recTilde6 = sumPerOffspringGamete[gametes2, 6, recSep2] // FullSimplify
y6 (y1 + y2 + y3 - r1 y3 + y4 + y5 + y6 + y7 - r1 (y4 + y7)) + (r1 (y1 + y2 + y5) + y6) y8 +
  r2 (- (y1 + y3 + y4) y6 + y2 (y5 + y7 - r1 y7 + y8 - 2 r1 y8) + r1 (y4 y5 + y3 y6 + 2 y4 y6 - y1 y8))
yTilde6D =
  FullSimplify[Series[recTilde6 - y6 /. recScale, {ε, 0, 1}] /. recBackScale // Normal]
y6 (-1 + y1 + y2 + y3 - r1 y3 + y4 + y5 + y6 + y7 - r1 (y4 + y7)) +
  (r1 (y1 + y2 + y5) + y6) y8 + r2 (- (y1 + y3 + y4) y6 + y2 (y5 + y7 + y8))

```

```

Collect[yTilde6D, {r1, r2}]

-y6 + y1 y6 + y2 y6 + y3 y6 + y4 y6 + y5 y6 + y62 + y6 y7 + y6 y8 +
r1 (-y3 y6 - y6 (y4 + y7) + (y1 + y2 + y5) y8) + r2 (- (y1 + y3 + y4) y6 + y2 (y5 + y7 + y8))

FullSimplify[(-y6 + y1 y6 + y2 y6 + y3 y6 + y4 y6 + y5 y6 + y62 + y6 y7 + y6 y8),
Assumptions -> {y8 == 1 - y1 - y2 - y3 - y4 - y5 - y6 - y7, y1 + y2 + y3 + y4 + y5 + y6 + y7 + y8 == 1}]
0

```

We note that 'yTilde6D' can be simplified to

```

In[147]:= yTilde6DotRec := -r1 (y6 (1 - p) - y8 p) - r2 (y6 n - y2 (1 - n))

yTilde6DotRec - yTilde6D /. {p -> y1 + y2 + y5 + y6, q -> y1 + y3 + y5 + y7, n -> y1 + y2 + y3 + y4} //.
{y1 -> 1 - (y2 + y3 + y4 + y5 + y6 + y7 + y8)} // Simplify
0

recTilde7 = sumPerOffspringGamete[gametes2, 7, recSep2] // FullSimplify

y7 (y1 + y2 + y3 + y4 + y5 + y6 + y7 + y8) +
r1 (y4 (y5 - r2 y5) + y3 (y5 - 2 r2 y5 - r2 y6) + ((-1 + 2 r2) y1 + (-1 + r2) y2 - y6) y7 +
(r2 y1 + y5) y8) + r2 (- (y1 + y2 + y4) y7 + y3 (y5 + y6 + y8))

yTilde7D =
FullSimplify[Series[recTilde7 - y7 /. recScale, {ε, 0, 1}] /. recBackScale // Normal]

y7 (-1 + y1 + y2 + y3 + y4 + y5 + y6 + y7 + y8) +
r1 (- (y1 + y2 + y6) y7 + y5 (y3 + y4 + y8)) + r2 (- (y1 + y2 + y4) y7 + y3 (y5 + y6 + y8))

Collect[yTilde7D, {r1, r2}]

y7 (-1 + y1 + y2 + y3 + y4 + y5 + y6 + y7 + y8) +
r1 (- (y1 + y2 + y6) y7 + y5 (y3 + y4 + y8)) + r2 (- (y1 + y2 + y4) y7 + y3 (y5 + y6 + y8))

FullSimplify[(y7 (-1 + y1 + y2 + y3 + y4 + y5 + y6 + y7 + y8)),
Assumptions -> {y8 == 1 - y1 - y2 - y3 - y4 - y5 - y6 - y7, y1 + y2 + y3 + y4 + y5 + y6 + y7 + y8 == 1}]
0

```

We note that 'yTilde7D' can be simplified to

```

In[148]:= yTilde7DotRec := -r1 (y7 p - y5 (1 - p)) - r2 (y7 n - y3 (1 - n))

yTilde7DotRec - yTilde7D /. {p -> y1 + y2 + y5 + y6, q -> y1 + y3 + y5 + y7, n -> y1 + y2 + y3 + y4} //.
{y1 -> 1 - (y2 + y3 + y4 + y5 + y6 + y7 + y8)} // Simplify
0

recTilde8 = sumPerOffspringGamete[gametes2, 8, recSep2] // FullSimplify

r1 y6 (y3 + y4 + y7) - r1 (y1 + y2 + y5) y8 + y8 (y1 + y2 + y3 + y4 + y5 + y6 + y7 + y8) +
r2 (y4 (y5 - r1 y5 + y6 - 2 r1 y6 + y7) - (y1 + y2 + y3) y8 + r1 (-y3 y6 + y2 y7 + y1 y8 + 2 y2 y8))

yTilde8D =
FullSimplify[Series[recTilde8 - y8 /. recScale, {ε, 0, 1}] /. recBackScale // Normal]

r1 y6 (y3 + y4 + y7) + r2 y4 (y5 + y6 + y7) - r2 (y1 + y2 + y3) y8 -
r1 (y1 + y2 + y5) y8 + y8 (-1 + y1 + y2 + y3 + y4 + y5 + y6 + y7 + y8)

Collect[yTilde8D, {r1, r2}]

y8 (-1 + y1 + y2 + y3 + y4 + y5 + y6 + y7 + y8) +
r2 (y4 (y5 + y6 + y7) + (-y1 - y2 - y3) y8) + r1 (y6 (y3 + y4 + y7) + (-y1 - y2 - y5) y8)

FullSimplify[(y8 (-1 + y1 + y2 + y3 + y4 + y5 + y6 + y7 + y8)),
Assumptions -> {y8 == 1 - y1 - y2 - y3 - y4 - y5 - y6 - y7, y1 + y2 + y3 + y4 + y5 + y6 + y7 + y8 == 1}]
0

```

We note that 'yTilde8D' can be simplified to



In[149]:=

```
yTilde8DotRec := -r1 (y8 p - y6 (1 - p)) - r2 (y8 n - y4 (1 - n))
```

```
yTilde8DotRec - yTilde8D /. {p → y1 + y2 + y5 + y6, q → y1 + y3 + y5 + y7, n → y1 + y2 + y3 + y4} //.
{y1 → 1 - (y2 + y3 + y4 + y5 + y6 + y7 + y8)} // Simplify
```

0

### ■ In terms of allele frequencies and LD

```
allToGam
```

```
{p → y1 + y2 + y5 + y6, q → y1 + y3 + y5 + y7, n → y1 + y2 + y3 + y4}
```

In[150]:=

```
pTildeDotRec := D[pDef /. {y1 → y1[t], y2 → y2[t], y5 → y5[t], y6 → y6[t]}, t] /.
{y1'[t] → yTilde1DotRec, y2'[t] → yTilde2DotRec, y5'[t] → yTilde5DotRec,
y6'[t] → yTilde6DotRec} /. gamToAllLD // FullSimplify
qTildeDotRec := D[qDef /. {y1 → y1[t], y3 → y3[t], y5 → y5[t], y7 → y7[t]}, t] /.
{y1'[t] → yTilde1DotRec, y3'[t] → yTilde3DotRec, y5'[t] → yTilde5DotRec,
y7'[t] → yTilde7DotRec} /. gamToAllLD // FullSimplify
nTildeDotRec := D[nDef /. {y1 → y1[t], y2 → y2[t], y3 → y3[t], y4 → y4[t]}, t] /.
{y1'[t] → yTilde1DotRec, y2'[t] → yTilde2DotRec, y3'[t] → yTilde3DotRec,
y4'[t] → yTilde4DotRec} /. gamToAllLD // FullSimplify
DACTildeDotRec := D[DACDef /. {y1 → y1[t], y2 → y2[t], y3 → y3[t],
y4 → y4[t], y5 → y5[t], y6 → y6[t], y7 → y7[t], y8 → y8[t]}, t] /.
{y1'[t] → yTilde1DotRec, y2'[t] → yTilde2DotRec, y3'[t] → yTilde3DotRec,
y4'[t] → yTilde4DotRec, y5'[t] → yTilde5DotRec, y6'[t] → yTilde6DotRec,
y7'[t] → yTilde7DotRec, y8'[t] → yTilde8DotRec} /.
{x[t] → x} /. gamToAllLD // FullSimplify
DCBTildeDotRec := D[DCBDef /. {y1 → y1[t], y2 → y2[t], y3 → y3[t],
y4 → y4[t], y5 → y5[t], y6 → y6[t], y7 → y7[t], y8 → y8[t]}, t] /.
{y1'[t] → yTilde1DotRec, y2'[t] → yTilde2DotRec, y3'[t] → yTilde3DotRec,
y4'[t] → yTilde4DotRec, y5'[t] → yTilde5DotRec, y6'[t] → yTilde6DotRec,
y7'[t] → yTilde7DotRec, y8'[t] → yTilde8DotRec} /.
{x[t] → x} /. gamToAllLD // FullSimplify
DABTildeDotRec := D[DABDef /. {y1 → y1[t], y2 → y2[t], y3 → y3[t],
y4 → y4[t], y5 → y5[t], y6 → y6[t], y7 → y7[t], y8 → y8[t]}, t] /.
{y1'[t] → yTilde1DotRec, y2'[t] → yTilde2DotRec, y3'[t] → yTilde3DotRec,
y4'[t] → yTilde4DotRec, y5'[t] → yTilde5DotRec, y6'[t] → yTilde6DotRec,
y7'[t] → yTilde7DotRec, y8'[t] → yTilde8DotRec} /.
{x[t] → x} /. gamToAllLD // FullSimplify
DACBTildeDotRec := D[DACBDef /. {y1 → y1[t], y2 → y2[t], y3 → y3[t],
y4 → y4[t], y5 → y5[t], y6 → y6[t], y7 → y7[t], y8 → y8[t]}, t] /.
{y1'[t] → yTilde1DotRec, y2'[t] → yTilde2DotRec, y3'[t] → yTilde3DotRec,
y4'[t] → yTilde4DotRec, y5'[t] → yTilde5DotRec, y6'[t] → yTilde6DotRec,
y7'[t] → yTilde7DotRec, y8'[t] → yTilde8DotRec} /.
{x[t] → x} /. gamToAllLD // FullSimplify
```

```
{pTildeDotRec, qTildeDotRec, nTildeDotRec, DACTildeDotRec,
DCBTildeDotRec, DABTildeDotRec, DACBTildeDotRec} // TableForm
```

0

0

0

```
-DAC (r1 + r2)
```

```
-DCB r2
```

```
-DAB r1
```

```
-DACB (r1 + r2)
```

### ■ A comment to the differential equations under migration and selection

The differential equations under migration and selection are independent of the ordering of the loci, as long as gametes and their frequencies are defined consistently (such as given above).

- Differential equations under selection, migration and recombination
- In terms of gamete frequencies

In[157]:=

```

yTilde1Dot := y1DotSel + y1DotMig + yTilde1DotRec
yTilde2Dot := y2DotSel + y2DotMig + yTilde2DotRec
yTilde3Dot := y3DotSel + y3DotMig + yTilde3DotRec
yTilde4Dot := y4DotSel + y4DotMig + yTilde4DotRec

yTilde5Dot := y5DotSel + y5DotMig + yTilde5DotRec
yTilde6Dot := y6DotSel + y6DotMig + yTilde6DotRec
yTilde7Dot := y7DotSel + y7DotMig + yTilde7DotRec
yTilde8Dot := y8DotSel + y8DotMig + yTilde8DotRec

```

```

{yTilde1Dot, yTilde2Dot, yTilde3Dot, yTilde4Dot, yTilde5Dot,
 yTilde6Dot, yTilde7Dot, yTilde8Dot} // Simplify // TableForm

```

```

-m y1 + r1 ((-1 + p) y1 + p y3) + r2 ((-1 + n) y1 + n y5) + y1 (b (y2 + y4 + y6 + y8) + a (y3 + y4 + y7 + y8)
-m y2 + r1 ((-1 + p) y2 + p y4) + r2 ((-1 + n) y2 + n y6) + y2 (-b (y1 + y3 + y5 + y7) + a (y3 + y4 + y7 + y8)
-m y3 - r1 ((-1 + p) y1 + p y3) + r2 ((-1 + n) y3 + n y7) + y3 (-a (y1 + y2 + y5 + y6) + b (y2 + y4 + y6 + y8)
m (nC - y4) - r1 ((-1 + p) y2 + p y4) + y4 (-a (y1 + y2 + y5 + y6) - b (y1 + y3 + y5 + y7)) + r2 ((-1 + n) y4
-m y5 - r2 ((-1 + n) y1 + n y5) + r1 ((-1 + p) y5 + p y7) + y5 (b (y2 + y4 + y6 + y8) + a (y3 + y4 + y7 + y8)
-m y6 - r2 ((-1 + n) y2 + n y6) + r1 ((-1 + p) y6 + p y8) + y6 (-b (y1 + y3 + y5 + y7) + a (y3 + y4 + y7 + y8)
-m y7 - r2 ((-1 + n) y3 + n y7) - r1 ((-1 + p) y5 + p y7) + y7 (-a (y1 + y2 + y5 + y6) + b (y2 + y4 + y6 + y8)
(-a (y1 + y2 + y5 + y6) - b (y1 + y3 + y5 + y7)) y8 - m (-1 + nC + y8) - r2 ((-1 + n) y4 + n y8) - r1 ((-1 +

```

```

Map[Collect[#, {m, r1, r2}] &, {yTilde1Dot, yTilde2Dot, yTilde3Dot,
 yTilde4Dot, yTilde5Dot, yTilde6Dot, yTilde7Dot, yTilde8Dot}] // TableForm

```

```

-m y1 + r1 (- (1 - p) y1 + p y3) + r2 (- (1 - n) y1 + n y5) + y1 (b (y2 + y4 + y6 + y8) + a (y3 + y4 + y7 + y8)
-m y2 + r1 (- (1 - p) y2 + p y4) + r2 (- (1 - n) y2 + n y6) + y2 (-b (y1 + y3 + y5 + y7) + a (y3 + y4 + y7 + y8)
-m y3 + r1 ((1 - p) y1 - p y3) + r2 (- (1 - n) y3 + n y7) + y3 (-a (y1 + y2 + y5 + y6) + b (y2 + y4 + y6 + y8)
m (nC - y4) + r1 ((1 - p) y2 - p y4) + y4 (-a (y1 + y2 + y5 + y6) - b (y1 + y3 + y5 + y7)) + r2 (- (1 - n) y4
-m y5 + r2 ((1 - n) y1 - n y5) + r1 (- (1 - p) y5 + p y7) + y5 (b (y2 + y4 + y6 + y8) + a (y3 + y4 + y7 + y8))
-m y6 + r2 ((1 - n) y2 - n y6) + r1 (- (1 - p) y6 + p y8) + y6 (-b (y1 + y3 + y5 + y7) + a (y3 + y4 + y7 + y8))
-m y7 + r2 ((1 - n) y3 - n y7) + r1 ((1 - p) y5 - p y7) + y7 (-a (y1 + y2 + y5 + y6) + b (y2 + y4 + y6 + y8))
m (1 - nC - y8) + (-a (y1 + y2 + y5 + y6) - b (y1 + y3 + y5 + y7)) y8 + r2 ((1 - n) y4 - n y8) + r1 ((1 - p) y

```

- In terms of allele frequencies and LD

**nDotMig**

m (-n + nC)

**nDotSel**

a DAC + b DCB

In[165]:=

```

pTildeDot := pDotSel + pDotMig + pTildeDotRec
qTildeDot := qDotSel + qDotMig + qTildeDotRec
nTildeDot := nDotSel + nDotMig + nTildeDotRec
DACTildeDot := DACDotSel + DACDotMig + DACTildeDotRec
DCBTildeDot := DCBDotSel + DCBDotMig + DCBTildeDotRec
DABTildeDot := DABDotSel + DABDotMig + DABTildeDotRec
DACBTildeDot := DACBDotSel + DACBDotMig + DACBTildeDotRec

```

```

{pTildeDot, qTildeDot, nTildeDot, DACTildeDot,
 DCBTildeDot, DABTildeDot, DACBTildeDot} // FullSimplify // TableForm

```

```

b DAB - (m + a (-1 + p)) p
a DAB - (m + b (-1 + q)) q
a DAC + b DCB + m (-n + nC)
b DACB + m (n - nC) p + a (DAC - 2 DAC p) - DAC (m + r1 + r2)
a DACB + m (n - nC) q + b (DCB - 2 DCB q) - DCB (m + r2)
-DAB m + m p q + DAB (a + b - 2 a p - 2 b q) - DAB r1
a (-2 DAB DAC + DACB - 2 DACB p) + b (DACB - 2 DAB DCB - 2 DACB q) + m (-DACB + DCB p + DAC q + (n - nC) (I

```

```

Map[Collect[#, {m, r1, r2}] &, {pTildeDot, qTildeDot, nTildeDot,
  DACTildeDot, DCBTildeDot, DABTildeDot, DACBTildeDot}] // TableForm

b DAB - m p - a (-1 + p) p
a DAB - m q - b (-1 + q) q
a DAC + b DCB + m (-n + nC)
b DACB + a (DAC - 2 DAC p) + m (-DAC - (-n + nC) p) - DAC r1 - DAC r2
a DACB + b DCB (1 - 2 q) + m (-DCB - (-n + nC) q) - DCB r2
DAB (a + b - 2 a p - 2 b q) + m (-DAB + p q) - DAB r1
a (-2 DAB DAC + DACB - 2 DACB p) + b (DACB - 2 DAB DCB - 2 DACB q) + m (-DACB + DCB p + DAC q + (n - nC) (I
Map[Collect[#, {DAC, DAB, DCB, DACB}] &, {pTildeDot, qTildeDot, nTildeDot,
  DACTildeDot, DCBTildeDot, DABTildeDot, DACBTildeDot}] // TableForm

b DAB - m p - a (-1 + p) p
a DAB - m q - b (-1 + q) q
a DAC + b DCB + m (-n + nC)
b DACB - m (-n + nC) p + DAC (a - m - 2 a p - r1 - r2)
a DACB - m (-n + nC) q + DCB (-m + b (1 - 2 q) - r2)
m p q + DAB (a + b - m - 2 a p - 2 b q - r1)
DAB (-2 b DCB + m (n - nC)) + DCB m p - m (n - nC) p q + DAC (-2 a DAB + m q) + DACB (a + b - m - 2 a p - 2 b q
TM1 =
  Map[Collect[#, {DAC, DAB, DCB, DACB}] &, {pTildeDot, qTildeDot, nTildeDot, DACTildeDot,
    DCBTildeDot, DABTildeDot, DACBTildeDot}] /. {r1 -> rAB, r2 -> rCB}; TM1 // TableForm

b DAB - m p - a (-1 + p) p
a DAB - m q - b (-1 + q) q
a DAC + b DCB + m (-n + nC)
b DACB - m (-n + nC) p + DAC (a - m - 2 a p - rAB - rCB)
a DACB - m (-n + nC) q + DCB (-m + b (1 - 2 q) - rCB)
m p q + DAB (a + b - m - 2 a p - 2 b q - rAB)
DAB (-2 b DCB + m (n - nC)) + DCB m p - m (n - nC) p q + DAC (-2 a DAB + m q) + DACB (a + b - m - 2 a p - 2 b q

```

For comparison, we print the differential equations for the case of the ordering  $\mathcal{A} - \mathcal{C} - \mathcal{B}$  from above:

```

Map[Collect[#, {m, r1, r2}] &,
  {pDot, qDot, nDot, DACDot, DCBDot, DABDot, DACBDot}] // TableForm

b DAB - m p - a (-1 + p) p
a DAB - m q - b (-1 + q) q
a DAC + b DCB + m (-n + nC)
b DACB + a (DAC - 2 DAC p) + m (-DAC - (-n + nC) p) - DAC r1
a DACB + b DCB (1 - 2 q) + m (-DCB - (-n + nC) q) - DCB r2
DAB (a + b - 2 a p - 2 b q) + m (-DAB + p q) - DAB r1 - DAB r2
a (-2 DAB DAC + DACB - 2 DACB p) + b (DACB - 2 DAB DCB - 2 DACB q) + m (-DACB + DCB p + DAC q + (n - nC) (I
Map[Collect[#, {DAC, DAB, DCB, DACB}] &,
  {pDot, qDot, nDot, DACDot, DCBDot, DABDot, DACBDot}] // TableForm

b DAB - m p - a (-1 + p) p
a DAB - m q - b (-1 + q) q
a DAC + b DCB + m (-n + nC)
b DACB - m (-n + nC) p + DAC (a - m - 2 a p - r1)
a DACB - m (-n + nC) q + DCB (-m + b (1 - 2 q) - r2)
m p q + DAB (a + b - m - 2 a p - 2 b q - r1 - r2)
DAB (-2 b DCB + m (n - nC)) + DCB m p - m (n - nC) p q + DAC (-2 a DAB + m q) + DACB (a + b - m - 2 a p - 2 b q

```

```

TM2 = Map[Collect[#, {DAC, DAB, DCB, DACB}] &,
  {pDot, qDot, nDot, DACDot, DCBDot, DABDot, DACBDot}] /. {r1 -> rAC, r2 -> rCB};
TM2 //
  TableForm

b DAB - m p - a (-1 + p) p
a DAB - m q - b (-1 + q) q
a DAC + b DCB + m (-n + nC)
b DACB - m (-n + nC) p + DAC (a - m - 2 a p - rAC)
a DACB - m (-n + nC) q + DCB (-m + b (1 - 2 q) - rCB)
m p q + DAB (a + b - m - 2 a p - 2 b q - rAC - rCB)
DAB (-2 b DCB + m (n - nC)) + DCB m p - m (n - nC) p q + DAC (-2 a DAB + m q) + DACB (a + b - m - 2 a p - 2 b q

```

A comparison shows that only the differentials of  $\dot{D}_{AC}$  and  $\dot{D}_{AB}$  change.

```

MapThread[Simplify[#1 == #2] &, {TM1, TM2}] // TableForm

True
True
True
DAC (rAB - rAC + rCB) == 0
True
DAB rAB == DAB (rAC + rCB)
DACB rAB == DACB rAC

MapThread[Simplify[#1 == #2] &,
  {Map[Collect[#, {m, r1, r2}] &, {pTildeDot, qTildeDot, nTildeDot, DACTildeDot,
    DCBTildeDot, DABTildeDot, DACBTildeDot}], Map[Collect[#, {m, r1, r2}] &,
    {pDot, qDot, nDot, DACDot, DCBDot, DABDot, DACBDot}]}] // TableForm

True
True
True
DAC r2 == 0
True
DAB r2 == 0
True

```

## Internal equilibrium

### ■ Coordinates

We recall the differential equations:

```

In[172]:= diffEqsTilde = Map[Collect[#, {m, r1, r2}] &, {pTildeDot, qTildeDot,
  DABTildeDot, nTildeDot, DACTildeDot, DCBTildeDot, DACBTildeDot}];
diffEqsTilde // TableForm

```

Out[173]//TableForm=

```

b DAB - m p - a (-1 + p) p
a DAB - m q - b (-1 + q) q
DAB (a + b - 2 a p - 2 b q) + m (-DAB + p q) - DAB r1
a DAC + b DCB + m (-n + nC)
b DACB + a (DAC - 2 DAC p) + m (-DAC - (-n + nC) p) - DAC r1 - DAC r2
a DACB + b DCB (1 - 2 q) + m (-DCB - (-n + nC) q) - DCB r2
a (-2 DAB DAC + DACB - 2 DACB p) + b (DACB - 2 DAB DCB - 2 DACB q) + m (-DACB + DCB p + DAC q + (n - nC) (I

```

BA2011 (eq. 3.15) showed the coordinates of the internal stable equilibrium to be

```

In[174]:= R2 :=  $\sqrt{(a + b + r)^2 - 8 m r1}$ 

```

```
In[175]:= pEqTilde :=  $\frac{1}{8 a r} (b^2 - a^2 + 6 a r - r^2 - 4 m r + (a - b + r) R2) // . \{r \rightarrow r1\}$ 
qEqTilde :=  $\frac{1}{8 b r} (a^2 - b^2 + 6 b r - r^2 - 4 m r + (b - a + r) R2) // . \{r \rightarrow r1\}$ 
DABEqTilde :=  $\frac{1}{32 a b r^2} ((a - b - r) (a + b - r) (a - b + r) ((a + b + r) - R2) - 4 m r (a^2 + b^2 + r^2 - 2 a b - 2 a r - 2 b r) - 8 m^2 r^2) // . \{r \rightarrow r1\}$ 
nEqTilde := nC
DACEqTilde := 0
DCBEqTilde := 0
DACBEqTilde := 0
```

We have used the assumption that higher-order recombination terms can be ignored, and therefore  $r = r_1 + r_2$ .

```
In[182]:= ruleApplyEqTilde := {p → pEqTilde, q → qEqTilde, n → nEqTilde,
  DAB → DABEqTilde, DAC → DACEqTilde, DCB → DCBEqTilde, DACB → DACBEqTilde}
```

We have

```
diffEqsTilde /. ruleApplyEqTilde // FullSimplify
{0, 0, 0, 0, 0, 0, 0}
```

which confirms that this is indeed an equilibrium. We omit the proof that this equilibrium is asymptotically stable (cf. Bürger and Akerman 2011). Instead, we directly proceed to the computation of the Jacobian matrix.

### ■ Jacobian matrix and effective migration rate

#### ■ Generic

```
In[183]:= JTilde := Map[Table[D[#, {i}], {i, {p, q, DAB, n, DAC, DCB, DACB}}] &, diffEqsTilde]
JTilde // MatrixForm
```

Out[184]/MatrixForm=

$$\begin{pmatrix} -m - a(-1 + p) - a p & 0 & b \\ 0 & -m - b(-1 + q) - b q & a \\ -2 a DAB + m q & -2 b DAB + m p & a + b - m - 2 a p - 2 b q - r1 \\ 0 & 0 & 0 \\ -2 a DAC + m(n - nC) & 0 & 0 \\ 0 & -2 b DCB + m(n - nC) & 0 \\ -2 a DACB + m(DCB - (n - nC) q) & -2 b DACB + m(DAC - (n - nC) p) & -2 a DAC - 2 b DCB + m(n - nC) \quad m(D^2) \end{pmatrix}$$

```
D[diffEqsTilde[[7]], DACB]
-m + a(1 - 2 p) + b(1 - 2 q) - r1 - r2
FullSimplify[Normal[Series[% /. ruleApplyEqTilde, {m, 0, 1}]],
  Assumptions → {0 < a < b, 0 < r1, 0 < r2}]
-a - b - r1 +  $\frac{m(a + b + 3 r1)}{a + b + r1} - r2$ 
D[diffEqs[[7]], DACB]
-m + a(1 - 2 p) + b(1 - 2 q) - r1 - r2
FullSimplify[Normal[Series[% /. ruleApplyEq, {m, 0, 1}]],
  Assumptions → {0 < a < b, 0 < r1, 0 < r2}]
-a - b + 3 m - r1 - r2 -  $\frac{2(a + b) m}{a + b + r1 + r2}$ 
% -  $\left( -a - b - r1 - r2 + \frac{m(a + b + 3(r1 + r2))}{a + b + r1 + r2} \right) // FullSimplify$ 
0
```

For comparison

**J // MatrixForm**

$$\begin{pmatrix} -m - a(-1 + p) - ap & 0 & b \\ 0 & -m - b(-1 + q) - bq & a \\ -2aDAB + mq & -2bDAB + mp & a + b - m - 2ap - 2bq - r1 - r2 \\ 0 & 0 & 0 \\ -2aDAC + m(n - nC) & 0 & 0 \\ 0 & -2bDCB + m(n - nC) & 0 \\ -2aDACB + m(DCB - (n - nC)q) & -2bDACB + m(DAC - (n - nC)p) & -2aDAC - 2bDCB + m(n - nC) - m(D$$

As an intermediate step, we set  $n$ ,  $D_{AC}$ ,  $D_{CB}$ , and  $D_{ACB}$  to their equilibrium values  $n_c$ ,  $0$ ,  $0$ , and  $0$ , respectively.

In[185]:= **JTildePrep = JTilde /. {n -> nC, DAC -> 0, DCB -> 0, DACB -> 0} // FullSimplify;**  
**JTildePrep // MatrixForm**

Out[186]//MatrixForm=

$$\begin{pmatrix} a - m - 2ap & 0 & b & 0 & 0 & 0 \\ 0 & b - m - 2bq & a & 0 & 0 & 0 \\ -2aDAB + mq & -2bDAB + mp & a + b - m - 2ap - 2bq - r1 & 0 & 0 & 0 \\ 0 & 0 & 0 & -m & a & b \\ 0 & 0 & 0 & mp & a - m - 2ap - r1 - r2 & 0 \\ 0 & 0 & 0 & mq & 0 & b - m - 2 \\ 0 & 0 & 0 & m(DAB - pq) & -2aDAB + mq & -2bDA$$

Now we plug in the equilibrium coordinates into the generic matrix of first-order partial derivatives:

In[187]:= **JEqGenericTilde = JTildePrep /. ruleApplyEqTilde // FullSimplify;**  
**JEqGenericTilde // MatrixForm**

Out[188]//MatrixForm=

$$\begin{pmatrix} a - m - \frac{-a^2 + b^2 + 6ar1 - 4mr1 - r1^2 + (a - b + r1)\sqrt{-8mr1 + (a + b + r1)^2}}{4r1} & 0 & b & 0 & 0 & 0 \\ 0 & 0 & a & 0 & 0 & 0 \\ \frac{8m^2r1^2 + 4mr1(a^2 + (b - r1)^2 - 2a(b + r1)) - (a - b - r1)(a + b - r1)(a - b + r1)(a + b + r1 - \sqrt{-8mr1 + (a + b + r1)^2}) + 2mr1(a^2 - b^2 + 6br1 - 4mr1 - r1^2) - (-a - b + r1)(a - b + r1)(a - b - r1)(a + b + r1)}{16br1^2} & 0 & 0 & 0 & 0 & 0 \\ 0 & 0 & 0 & 0 & 0 & 0 \\ 0 & 0 & 0 & 0 & 0 & 0 \\ 0 & 0 & 0 & 0 & 0 & 0 \end{pmatrix}$$

This is a complicated matrix. Below, we instead plug in the weak-migration approximation to the internal equilibrium.

In[189]:= **JEqGenericTildemSmall := Simplify[Normal[Series[JEqGenericTilde, {m, 0, 1}]],**  
**Assumptions -> {0 < a < b, 0 < m < b, 0 < r1, 0 < r2}]**  
**JEqGenericTildemSmall // MatrixForm**

Out[190]//MatrixForm=

$$\begin{pmatrix} -a + \frac{m(a - b + r1)}{a + b + r1} & 0 & b & 0 & 0 & 0 \\ 0 & -b + \frac{m(-a + b + r1)}{a + b + r1} & a & 0 & 0 & 0 \\ \frac{m(-a + b + r1)}{a + b + r1} & \frac{m(a - b + r1)}{a + b + r1} & -a - b - r1 + \frac{m(a + b + 3r1)}{a + b + r1} & 0 & 0 & 0 \\ 0 & 0 & 0 & -m & a & b \\ 0 & 0 & 0 & m & -a - r1 + \frac{m(a - b + r1)}{a + b + r1} - r2 & 0 \\ 0 & 0 & 0 & m & 0 & -b + \frac{m(-a + b + r1)}{a + b + r1} - r2 \\ 0 & 0 & 0 & -m & \frac{m(-a + b + r1)}{a + b + r1} & \frac{m(a - b + r1)}{a + b + r1} \end{pmatrix}$$

For comparison

**JEqSmall // MatrixForm**

$$\begin{pmatrix} -a + m - \frac{2bm}{a+b+r1+r2} & 0 & b & 0 & 0 \\ 0 & -b + m - \frac{2am}{a+b+r1+r2} & a & 0 & 0 \\ \frac{m(-a+b+r1+r2)}{a+b+r1+r2} & m - \frac{2bm}{a+b+r1+r2} & -a - b - r1 - r2 + \frac{m(a+b+3(r1+r2))}{a+b+r1+r2} & 0 & 0 \\ 0 & 0 & 0 & -m & a \\ 0 & 0 & 0 & m & -a + m - r1 - \frac{2bm}{a+b+r1+r2} \\ 0 & 0 & 0 & m & 0 & -b + m \\ 0 & 0 & 0 & -m & \frac{m(-a+b+r1+r2)}{a+b+r1+r2} & m \end{pmatrix}$$

In[191]:= **JEqNGenericTilde := JEqGenericTilde[[4 ;; 7, 4 ;; 7]]**  
**JEqNGenericTilde // MatrixForm**

Out[192]//MatrixForm=

$$\begin{pmatrix} & & & & & -m \\ & & & & m \left( \frac{-a^2+b^2+6ar1-4mr1-r1^2+(a-b+r1)\sqrt{-8mr1+(a+b)}}{8ar1} \right) & \\ & & & & m \left( \frac{a^2-b^2+6br1-4mr1-r1^2+(-a+b+r1)\sqrt{-8mr1+(a+b)}}{8br1} \right) & \\ m \left( \frac{-\left( -a^2+b^2+6ar1-4mr1-r1^2+(a-b+r1)\sqrt{-8mr1+(a+b+r1)^2} \right) \left( a^2-b^2+6br1-4mr1-r1^2+(-a+b+r1)\sqrt{-8mr1+(a+b+r1)^2} \right) + 2(-8m^2r1^2-4n}{64abr1^2} \right) & & & & & \end{pmatrix}$$

In[193]:=

**JEqNGenericTildemSmall := Simplify[Normal[Series[JEqNGenericTilde, {m, 0, 1}]], Assumptions -> {0 < a < b, 0 < m < b, 0 < r1, 0 < r2}]**  
**JEqNGenericTildemSmall // MatrixForm**

Out[194]//MatrixForm=

$$\begin{pmatrix} -m & a & b & 0 \\ m & -a - r1 + \frac{m(a-b+r1)}{a+b+r1} - r2 & 0 & b \\ m & 0 & -b + \frac{m(-a+b+r1)}{a+b+r1} - r2 & a \\ -m & \frac{m(-a+b+r1)}{a+b+r1} & \frac{m(a-b+r1)}{a+b+r1} & -a - b - r1 + \frac{m(a+b+3r1)}{a+b+r1} - r2 \end{pmatrix}$$

**TM3 = JEqNGenericTildemSmall /. {r1 -> rAB, r2 -> rBC};**  
**TM3 // MatrixForm**

$$\begin{pmatrix} -m & a & b & 0 \\ m & -a - rAB + \frac{m(a-b+rAB)}{a+b+rAB} - rBC & 0 & b \\ m & 0 & -b + \frac{m(-a+b+rAB)}{a+b+rAB} - rBC & a \\ -m & \frac{m(-a+b+rAB)}{a+b+rAB} & \frac{m(a-b+rAB)}{a+b+rAB} & -a - b - rAB + \frac{m(a+b+3rAB)}{a+b+rAB} - rBC \end{pmatrix}$$

For comparison:

**JEqNmSmall // MatrixForm**

$$\begin{pmatrix} -m & a & b & 0 \\ m & -a + m - r1 - \frac{2bm}{a+b+r1+r2} & 0 & b \\ m & 0 & -b + m - r2 - \frac{2am}{a+b+r1+r2} & a \\ -m & \frac{m(-a+b+r1+r2)}{a+b+r1+r2} & m - \frac{2bm}{a+b+r1+r2} & -a - b - r1 - r2 + \frac{m(a+b+3(r1+r2))}{a+b+r1+r2} \end{pmatrix}$$

**TM4 = JEqNmSmall /. {r1 -> rAC, r2 -> rCB};**  
**TM4 // MatrixForm**

$$\begin{pmatrix} -m & a & b & 0 \\ m & -a + m - rAC - \frac{2bm}{a+b+rAC+rCB} & 0 & b \\ m & 0 & -b + m - rCB - \frac{2am}{a+b+rAC+rCB} & a \\ -m & \frac{m(-a+b+rAC+rCB)}{a+b+rAC+rCB} & m - \frac{2bm}{a+b+rAC+rCB} & -a - b - rAC - rCB + \frac{m(a+b+3(rAC+rCB))}{a+b+rAC+rCB} \end{pmatrix}$$

FullSimplify[JEqNGenericTildemSmall - JEQNmSmall] // MatrixForm

$$\begin{pmatrix} 0 & 0 & 0 & 0 \\ 0 & r2 \left( -1 - \frac{2 b m}{(a+b+r1)(a+b+r1+r2)} \right) & 0 & 0 \\ 0 & 0 & -\frac{2 a m r2}{(a+b+r1)(a+b+r1+r2)} & 0 \\ 0 & -\frac{2 a m r2}{(a+b+r1)(a+b+r1+r2)} & -\frac{2 b m r2}{(a+b+r1)(a+b+r1+r2)} & -\frac{2 (a+b) m r2}{(a+b+r1)(a+b+r1+r2)} \end{pmatrix}$$

- Using the Ansatz  $m_e = -\lambda_N = m z$

JEqGenericTilde // MatrixForm

$$\begin{pmatrix} a - m - \frac{-a^2+b^2+6 a r1-4 m r1-r1^2+(a-b+r1) \sqrt{-8 m r1+(a+b+r1)^2}}{4 r1} & 0 & 0 & 0 & 0 & 0 \\ 8 m^2 r1^2+4 m r1 (a^2+(b-r1)^2-2 a (b+r1))-(a-b-r1)(a+b-r1)(a-b+r1) \left( a+b+r1-\sqrt{-8 m r1+(a+b+r1)^2} \right)+2 m r1 (a^2-b^2+6 b r1-4 m r1-r1^2+(-a-b+r1) \sqrt{-8 m r1+(a+b+r1)^2}) & 0 & 0 & 0 & 0 & 0 \\ \frac{16 b r1^2}{16 b r1^2} & 0 & 0 & 0 & 0 & 0 \\ 0 & 0 & 0 & 0 & 0 & 0 \\ 0 & 0 & 0 & 0 & 0 & 0 \\ 0 & 0 & 0 & 0 & 0 & 0 \end{pmatrix}$$

Simplify[Series[Det[JEqGenericTilde - x IdentityMatrix[7] /. x -> -m z], {m, 0, 1}], Assumptions -> {a >= 0, b >= 0, r1 >= 0, r2 >= 0}] // Normal

$$a b m (a+b+r1)(a+r1+r2) (b^2 z+r2(r1(-1+z)+r2(-1+z)+a z)+b((a+r1)z+r2(-1+2 z)))$$

Simplify[Solve[% == 0, z]]

$$\left\{ \left\{ z \rightarrow \frac{r2(b+r1+r2)}{(b+r2)(a+b+r1+r2)} \right\} \right\}$$

which is identical to eq. (4.30) in BA2011. Or, alternatively and more directly:

JEqNGenericTildemSmall // MatrixForm

$$\begin{pmatrix} -m & a & b & 0 \\ m & -a-r1+\frac{m(a-b+r1)}{a+b+r1}-r2 & 0 & b \\ m & 0 & -b+\frac{m(-a+b+r1)}{a+b+r1}-r2 & a \\ -m & \frac{m(-a+b+r1)}{a+b+r1} & \frac{m(a-b+r1)}{a+b+r1} & -a-b-r1+\frac{m(a+b+3r1)}{a+b+r1}-r2 \end{pmatrix}$$

Simplify[Series[Det[JEqNGenericTildemSmall - x IdentityMatrix[4] /. x -> -m z], {m, 0, 1}], Assumptions -> {a >= 0, b >= 0, r1 >= 0, r2 >= 0}] // Normal

$$-m(a+r1+r2)(b^2 z+r2(r1(-1+z)+r2(-1+z)+a z)+b((a+r1)z+r2(-1+2 z)))$$

Simplify[Solve[% == 0, z]]

$$\left\{ \left\{ z \rightarrow \frac{r2(b+r1+r2)}{(b+r2)(a+b+r1+r2)} \right\} \right\}$$

- Assuming weak migration

The coordinates of the internal equilibrium under the assumption of weak migration, up to and including first-order terms of  $m$ , can be obtained from eq. (4.1) in BA2011.



```

In[195]:= pEqTildeWeakMig = FullSimplify[Series[pEqTilde, {m, 0, 1}] // Normal,
  Assumptions → {0 < a < b, 0 < m, 0 < r1, 0 < r2}];
qEqTildeWeakMig = FullSimplify[Series[qEqTilde, {m, 0, 1}] // Normal,
  Assumptions → {0 < a < b, 0 < m, 0 < r1, 0 < r2}];
DABEqTildeWeakMig = FullSimplify[Series[DABEqTilde, {m, 0, 1}] // Normal,
  Assumptions → {0 < a < b, 0 < m, 0 < r1, 0 < r2}];
{pEqTildeWeakMig, qEqTildeWeakMig, DABEqTildeWeakMig} // TableForm

1 -  $\frac{m(a+r1)}{a(a+b+r1)}$ 
 $\frac{a b + (b-m)(b+r1)}{b(a+b+r1)}$ 
 $\frac{m}{a+b+r1}$ 

```

Checking these against first-order terms of eq. (4.1) in BA2011:

```

1 -  $\frac{m}{a} \left( 1 - \frac{b}{a+b+r} \right) - \text{pEqTildeWeakMig} /. \{r \rightarrow r1\} // \text{FullSimplify}$ 
0

1 -  $\frac{m}{b} \left( 1 - \frac{a}{a+b+r} \right) - \text{qEqTildeWeakMig} /. \{r \rightarrow r1\} // \text{FullSimplify}$ 
0

 $\frac{m}{a+b+r} - \text{DABEqTildeWeakMig} /. \{r \rightarrow r1\} // \text{FullSimplify}$ 
0

```

```

In[198]:= ruleApplyEqWeakMigTilde := {p → pEqTildeWeakMig, q → qEqTildeWeakMig,
  n → nC, DAB → DABEqTildeWeakMig, DAC → 0, DCB → 0, DACB → 0}

```

```
ruleApplyEqWeakMigTilde
```

```

{p → 1 -  $\frac{m(a+r1)}{a(a+b+r1)}$ , q →  $\frac{a b + (b-m)(b+r1)}{b(a+b+r1)}$ ,
  n → nC, DAB →  $\frac{m}{a+b+r1}$ , DAC → 0, DCB → 0, DACB → 0}

```

```
JTildePrep // MatrixForm
```

$$\begin{pmatrix}
a - m - 2 a p & 0 & b & 0 & 0 & 0 \\
0 & b - m - 2 b q & a & 0 & 0 & 0 \\
-2 a DAB + m q & -2 b DAB + m p & a + b - m - 2 a p - 2 b q - r1 & 0 & 0 & 0 \\
0 & 0 & 0 & -m & a & b \\
0 & 0 & 0 & m p & a - m - 2 a p - r1 - r2 & 0 \\
0 & 0 & 0 & m q & 0 & b - m - 2 \\
0 & 0 & 0 & m(DAB - p q) & -2 a DAB + m q & -2 b DA
\end{pmatrix}$$

Now we see the block structure claimed in eq. (4.27) of BA2011.

```
In[199]:= JEqTilde = JTildePrep /. ruleApplyEqWeakMigTilde // FullSimplify;
JEqTilde // MatrixForm
```

Out[200]//MatrixForm=

$$\begin{pmatrix} -a + m - \frac{2bm}{a+b+r1} & 0 & b & 0 & 0 & 0 \\ 0 & -b + m - \frac{2am}{a+b+r1} & a & 0 & 0 & 0 \\ \frac{m(-ab+(b-m)(b+r1))}{b(a+b+r1)} & \frac{m(a^2-a(b+m-r1)-mr1)}{a(a+b+r1)} & -a-b+3m-r1 - \frac{2(a+b)m}{a+b+r1} & 0 & 0 & 0 \\ 0 & 0 & 0 & 0 & -m & 0 \\ 0 & 0 & 0 & 0 & m \left( 1 - \frac{m(a+r1)}{a(a+b+r1)} \right) & -a-m-r1+ \\ 0 & 0 & 0 & 0 & \frac{m(a+b+(b-m)(b+r1))}{b(a+b+r1)} & 0 \\ 0 & 0 & 0 & 0 & m \left( \frac{(ab+(b-m)(b+r1)) \left( 1 - \frac{m(a+r1)}{a(a+b+r1)} \right)}{b} \right) & \frac{m(-ab+(b-m)(b+r1))}{b(a+b+r1)} \end{pmatrix}$$

```
In[201]:= JEqNTilde = JEqTilde[{{4, 5, 6, 7}}, {{4, 5, 6, 7}}];
JEqNTilde // MatrixForm
```

Out[202]//MatrixForm=

$$\begin{pmatrix} -m & a & b & 0 & 0 \\ m \left( 1 - \frac{m(a+r1)}{a(a+b+r1)} \right) & -a-m-r1 + \frac{2m(a+r1)}{a+b+r1} - r2 & 0 & 0 & b \\ \frac{m(a+b+(b-m)(b+r1))}{b(a+b+r1)} & 0 & -\frac{(b+r1)(b-m+r2)+a(b+m+r2)}{a+b+r1} & 0 & a \\ m \left( \frac{(ab+(b-m)(b+r1)) \left( 1 - \frac{m(a+r1)}{a(a+b+r1)} \right)}{b} \right) & \frac{m(-ab+(b-m)(b+r1))}{b(a+b+r1)} & \frac{m(a^2-a(b+m-r1)-mr1)}{a(a+b+r1)} & -\frac{a^2+b^2+r1(-3m+r1+r2)+b(-m+2)}{a+b+r1} & 0 \end{pmatrix}$$

```
JEqTildemSmall := Simplify[Normal[Series[JEqTilde, {m, 0, 1}]]]
JEqTildemSmall // MatrixForm
```

$$\begin{pmatrix} -a + m - \frac{2bm}{a+b+r1} & 0 & b & 0 & 0 & 0 \\ 0 & -b + m - \frac{2am}{a+b+r1} & a & 0 & 0 & 0 \\ \frac{m(-a+b+r1)}{a+b+r1} & \frac{m(a-b+r1)}{a+b+r1} & -a-b-r1 + \frac{m(a+b+3r1)}{a+b+r1} & 0 & 0 & 0 \\ 0 & 0 & 0 & -m & a & b \\ 0 & 0 & 0 & m & -a-r1 + \frac{m(a-b+r1)}{a+b+r1} - r2 & 0 \\ 0 & 0 & 0 & m & 0 & -b + \frac{m(-a+b+r1)}{a+b+r1} - r2 \\ 0 & 0 & 0 & -m & \frac{m(-a+b+r1)}{a+b+r1} & \frac{m(a-b+r1)}{a+b+r1} \end{pmatrix}$$

```
JEqNTildemSmall := JEqTildemSmall[4 ;; 7, 4 ;; 7]
JEqNTildemSmall // MatrixForm
```

$$\begin{pmatrix} -m & a & b & 0 \\ m & -a-r1 + \frac{m(a-b+r1)}{a+b+r1} - r2 & 0 & b \\ m & 0 & -b + \frac{m(-a+b+r1)}{a+b+r1} - r2 & a \\ -m & \frac{m(-a+b+r1)}{a+b+r1} & \frac{m(a-b+r1)}{a+b+r1} & -a-b-r1 + \frac{m(a+b+3r1)}{a+b+r1} - r2 \end{pmatrix}$$

```
JEqNTildemSmall - JEqNGenericTildemSmall
```

```
{{0, 0, 0, 0}, {0, 0, 0, 0}, {0, 0, 0, 0}, {0, 0, 0, 0}}
```

■ Using the Ansatz  $m_e = -\lambda_N = m z$

**JEqTilde**

$$\left\{ \left\{ -a + m - \frac{2 b m}{a + b + r1}, 0, b, 0, 0, 0, 0 \right\}, \left\{ 0, -b + m - \frac{2 a m}{a + b + r1}, a, 0, 0, 0, 0 \right\}, \right. \\ \left. \left\{ \frac{m (-a b + (b - m) (b + r1))}{b (a + b + r1)}, \frac{m (a^2 - a (b + m - r1) - m r1)}{a (a + b + r1)}, \right. \right. \\ \left. \left. -a - b + 3 m - r1 - \frac{2 (a + b) m}{a + b + r1}, 0, 0, 0, 0 \right\}, \left\{ 0, 0, 0, -m, a, b, 0 \right\}, \right. \\ \left. \left\{ 0, 0, 0, m \left( 1 - \frac{m (a + r1)}{a (a + b + r1)} \right), -a - m - r1 + \frac{2 m (a + r1)}{a + b + r1} - r2, 0, b \right\}, \right. \\ \left. \left\{ 0, 0, 0, \frac{m (a b + (b - m) (b + r1))}{b (a + b + r1)}, 0, -\frac{(b + r1) (b - m + r2) + a (b + m + r2)}{a + b + r1}, a \right\}, \left\{ 0, 0, 0, \right. \right. \\ \left. \left. m \left( m - \frac{(a b + (b - m) (b + r1)) \left( 1 - \frac{m (a + r1)}{a (a + b + r1)} \right)}{b} \right) \right\}, \frac{m (-a b + (b - m) (b + r1))}{b (a + b + r1)}, \frac{m (a^2 - a (b + m - r1) - m r1)}{a (a + b + r1)}, \right. \\ \left. -\frac{1}{a + b + r1} (a^2 + b^2 + r1 (-3 m + r1 + r2) + b (-m + 2 r1 + r2) + a (2 b - m + 2 r1 + r2)) \right\} \left. \right\}$$

Applying the same Ansatz as above to the Jacobian obtained from the differential equations yields the following ratio between the effective and actual migration rate,  $\frac{m_e}{m}$ :

**ruleApplyEqWeakMigTilde**

$$\left\{ p \rightarrow 1 - \frac{m (a + r1)}{a (a + b + r1)}, q \rightarrow \frac{a b + (b - m) (b + r1)}{b (a + b + r1)}, \right. \\ \left. n \rightarrow nC, DAB \rightarrow \frac{m}{a + b + r1}, DAC \rightarrow 0, DCB \rightarrow 0, DACB \rightarrow 0 \right\}$$

**Simplify[**

**Series[Det[(JEqTilde /. ruleApplyEqWeakMigTilde) - x IdentityMatrix[7] /. x → -m z],**  
**{m, 0, 1}], Assumptions → {a ≥ 0, b ≥ 0, r1 ≥ 0, r2 ≥ 0} // Normal**

$$a b m (a + b + r1) (a + r1 + r2) \\ (b^2 z + r2 (r1 (-1 + z) + r2 (-1 + z) + a z) + b ((a + r1) z + r2 (-1 + 2 z)))$$

**Simplify[Solve[% == 0, z]]**

$$\left\{ \left\{ z \rightarrow \frac{r2 (b + r1 + r2)}{(b + r2) (a + b + r1 + r2)} \right\} \right\}$$

Or, alternatively and more directly:

**JEqNTildemSmall // MatrixForm**

$$\begin{pmatrix} -m & a & b & 0 \\ m & -a - r1 + \frac{m (a - b + r1)}{a + b + r1} - r2 & 0 & b \\ m & 0 & -b + \frac{m (-a + b + r1)}{a + b + r1} - r2 & a \\ -m & \frac{m (-a + b + r1)}{a + b + r1} & \frac{m (a - b + r1)}{a + b + r1} & -a - b - r1 + \frac{m (a + b + 3 r1)}{a + b + r1} - r2 \end{pmatrix}$$

■ Assuming tight linkage (weak recombination)

The coordinates of the internal equilibrium under the assumption of tight linkage, i.e.  $r \ll \min(a, m)$ , up to and including first-order terms of  $r$ , can be obtained from eq. (4.2) in BA2011.

```
{pEqTilde, qEqTilde, DABEqTilde} // MatrixForm
```

$$\begin{pmatrix} \frac{-a^2+b^2+6 a r_1-4 m r_1-r_1^2+(a-b+r_1) \sqrt{-8 m r_1+(a+b+r_1)^2}}{8 a r_1} \\ \frac{a^2-b^2+6 b r_1-4 m r_1-r_1^2+(-a+b+r_1) \sqrt{-8 m r_1+(a+b+r_1)^2}}{8 b r_1} \\ \frac{-8 m^2 r_1^2-4 m r_1 (a^2-2 a b+b^2-2 a r_1-2 b r_1+r_1^2)+(a-b-r_1) (a+b-r_1) (a-b+r_1) (a+b+r_1-\sqrt{-8 m r_1+(a+b+r_1)^2})}{32 a b r_1^2} \end{pmatrix}$$

```
In[203]:= pEqTildeWeakRec = FullSimplify[Series[pEqTilde, {r1, 0, 1}] // Normal,
  Assumptions -> {0 < a < b, 0 < m, 0 < r1, 0 < r2}] // FullSimplify;
qEqTildeWeakRec = FullSimplify[Series[qEqTilde, {r1, 0, 1}] // Normal,
  Assumptions -> {0 < a < b, 0 < m, 0 < r1, 0 < r2}] // FullSimplify;
DABEqTildeWeakRec = FullSimplify[Series[DABEqTilde, {r1, 0, 1}] // Normal,
  Assumptions -> {0 < a < b, 0 < m, 0 < r1, 0 < r2}] // FullSimplify;
{pEqTildeWeakRec, qEqTildeWeakRec, DABEqTildeWeakRec} // TableForm
```

$$\begin{aligned} & \frac{a (a+b)^2 (a+b-m) - m (b (b-m) + a (b+m)) r_1}{a (a+b)^3} \\ 1 - \frac{m}{a+b} - \frac{m (a^2+a (b-m) + b m) r_1}{b (a+b)^3} \\ & \frac{m \left( (a+b)^2 (a+b-m) - \frac{(a^2+a (b-m) + b m) (b (b-m) + a (b+m)) r_1}{a b} \right)}{(a+b)^4} \end{aligned}$$

Checking these against first-order terms of eq. (4.1) in BA2011:

$$1 - \frac{m}{a+b} - \frac{r m}{(a+b)^2} \left( \frac{b}{a} - \frac{m}{a+b} \left( \frac{b}{a} - 1 \right) \right) - \text{pEqTildeWeakRec} /. \{r \rightarrow r_1\} // \text{FullSimplify}$$

0

$$1 - \frac{m}{a+b} - \frac{r m}{(a+b)^2} \left( \frac{a}{b} + \frac{m}{a+b} \left( 1 - \frac{a}{b} \right) \right) - \text{qEqTildeWeakRec} /. \{r \rightarrow r_1\} // \text{FullSimplify}$$

0

$$\frac{m}{a+b} \left( 1 - \frac{m}{a+b} \right) - \frac{r m}{(a+b)^2} \left( 1 - \frac{m}{a+b} \left( 1 - \frac{m}{a+b} \right) \left( 2 - \frac{b}{a} - \frac{a}{b} \right) \right) - \text{DABEqTildeWeakRec} /. \{r \rightarrow r_1\} // \text{FullSimplify}$$

0

```
In[206]:= ruleApplyEqWeakRecTilde := {p -> pEqTildeWeakRec, q -> qEqTildeWeakRec,
  n -> nC, DAB -> DABEqTildeWeakRec, DAC -> 0, DCB -> 0, DACB -> 0}
```

```
ruleApplyEqWeakRecTilde
```

$$\left\{ p \rightarrow \frac{a (a+b)^2 (a+b-m) - m (b (b-m) + a (b+m)) r_1}{a (a+b)^3}, q \rightarrow 1 - \frac{m}{a+b} - \frac{m (a^2+a (b-m) + b m) r_1}{b (a+b)^3}, \right. \\ \left. n \rightarrow nC, DAB \rightarrow \frac{m \left( (a+b)^2 (a+b-m) - \frac{(a^2+a (b-m) + b m) (b (b-m) + a (b+m)) r_1}{a b} \right)}{(a+b)^4}, DAC \rightarrow 0, DCB \rightarrow 0, DACB \rightarrow 0 \right\}$$

```
JTildePrep // MatrixForm
```

$$\begin{pmatrix} a - m - 2 a p & 0 & b & 0 & 0 & 0 \\ 0 & b - m - 2 b q & a & 0 & 0 & 0 \\ -2 a DAB + m q & -2 b DAB + m p & a + b - m - 2 a p - 2 b q - r_1 & 0 & 0 & 0 \\ 0 & 0 & 0 & -m & a & b \\ 0 & 0 & 0 & m p & a - m - 2 a p - r_1 - r_2 & 0 \\ 0 & 0 & 0 & m q & 0 & b - m - 2 \\ 0 & 0 & 0 & m (DAB - p q) & -2 a DAB + m q & -2 b DA \end{pmatrix}$$

Now we see the block structure claimed in eq. (4.27) of BA2011.

```
In[207]:= JEqWeakRecTilde = JTildePrep /. ruleApplyEqWeakRecTilde // FullSimplify;
JEqWeakRecTilde // MatrixForm
```

Out[208]//MatrixForm=

$$\begin{pmatrix} -m + \frac{-a(a+b)^2(a+b-2m)+2m(b(b-m)+a(b+m))r1}{(a+b)^3} & 0 & 0 \\ 0 & \frac{-(a+b)^2(b(b-m)+a(b+m))+2m(a^2+a(b-m)+bm)r1}{(a+b)^3} & 0 \\ \frac{-(a-b)b(a+b)^2(a+b-m)m+m(2b(a+b)+(a-3b)m)(a^2+a(b-m)+bm)r1}{b(a+b)^4} & \frac{a(a-b)(a+b)^2(a+b-m)m+m(2a^2+2ab-3am+bm)(b(b-m)+a(b+m))r1}{a(a+b)^4} & 0 \\ 0 & 0 & 0 \\ 0 & 0 & 0 \\ 0 & 0 & 0 \\ 0 & 0 & 0 \end{pmatrix}$$

```
In[209]:= JEQNWeakRecTilde = JEqWeakRecTilde[{{4, 5, 6, 7}, {4, 5, 6, 7}}];
JEQNWeakRecTilde // MatrixForm
```

Out[210]//MatrixForm=

$$\begin{pmatrix} -m & 0 & 0 \\ \frac{m(a(a+b)^2(a+b-m)-m(b(b-m)+a(b+m))r1)}{a(a+b)^3} & 0 & -m-r1+\frac{-i}{a+b} \\ m\left(1-\frac{m}{a+b}-\frac{m(a^2+a(b-m)+bm)r1}{b(a+b)^3}\right) & 0 & 0 \\ \frac{m(-ab(a+b)^4(a+b-2m)(a+b-m)+(a+b)^2(a+b-2m)m(a^3+b^3-(a-b)^2m)r1-m^2(a^2+a(b-m)+bm)(b(b-m)+a(b+m))r1^2)}{ab(a+b)^6} & 0 & \frac{-(a-b)b(a+b)^2(a+b-m)m}{a(a+b)^4} \end{pmatrix}$$

■ Using the Ansatz  $m_e = -\lambda_N = m z$

**JEqWeakRecTilde**

$$\left\{ \left\{ -m + \frac{-a(a+b)^2(a+b-2m) + 2m(b(b-m) + a(b+m))r1}{(a+b)^3}, 0, b, 0, 0, 0, 0 \right\}, \right. \\ \left. \left\{ 0, \frac{-(a+b)^2(b(b-m) + a(b+m)) + 2m(a^2 + a(b-m) + bm)r1}{(a+b)^3}, a, 0, 0, 0, 0 \right\}, \right. \\ \left. \left\{ \frac{1}{b(a+b)^4} \left( -(a-b)b(a+b)^2(a+b-m)m + m(2b(a+b) + (a-3b)m)(a^2 + a(b-m) + bm)r1 \right), \right. \right. \\ \left. \frac{1}{a(a+b)^4} \left( a(a-b)(a+b)^2(a+b-m)m + m(2a^2 + 2ab - 3am + bm)(b(b-m) + a(b+m))r1 \right), \right. \\ \left. -a - b + m - \frac{(a+b-2m)r1}{a+b}, 0, 0, 0, 0 \right\}, \left\{ 0, 0, 0, -m, a, b, 0 \right\}, \\ \left\{ 0, 0, 0, \frac{m(a(a+b)^2(a+b-m) - m(b(b-m) + a(b+m))r1)}{a(a+b)^3}, \right. \\ \left. -m - r1 + \frac{-a(a+b)^2(a+b-2m) + 2m(b(b-m) + a(b+m))r1}{(a+b)^3} - r2, 0, b \right\}, \\ \left\{ 0, 0, 0, m \left( 1 - \frac{m}{a+b} - \frac{m(a^2 + a(b-m) + bm)r1}{b(a+b)^3} \right), 0, \right. \\ \left. -m + \frac{-b(a+b)^2(a+b-2m) + 2m(a^2 + a(b-m) + bm)r1}{(a+b)^3} - r2, a \right\}, \\ \left\{ 0, 0, 0, \frac{1}{ab(a+b)^6} m \left( -ab(a+b)^4(a+b-2m)(a+b-m) + (a+b)^2(a+b-2m)m \right. \right. \\ \left. \left. (a^3 + b^3 - (a-b)^2m)r1 - m^2(a^2 + a(b-m) + bm)(b(b-m) + a(b+m))r1^2 \right), \frac{1}{b(a+b)^4} \right. \\ \left. \left( -(a-b)b(a+b)^2(a+b-m)m + m(2b(a+b) + (a-3b)m)(a^2 + a(b-m) + bm)r1 \right), \right. \\ \left. \frac{1}{a(a+b)^4} \left( a(a-b)(a+b)^2(a+b-m)m + m(2a^2 + 2ab - 3am + bm)(b(b-m) + a(b+m))r1 \right), \right. \\ \left. \left. - \frac{a^2 + b^2 - 2m r1 + b(-m + r1 + r2) + a(2b - m + r1 + r2)}{a+b} \right\} \right\}$$

Applying the same Ansatz as above to the Jacobian obtained from the differential equations yields the following ratio between the effective and actual migration rate,  $\frac{m_e}{m}$ :

**ruleApplyEqWeakRecTilde**

$$\left\{ p \rightarrow \frac{a(a+b)^2(a+b-m) - m(b(b-m) + a(b+m))r1}{a(a+b)^3}, q \rightarrow 1 - \frac{m}{a+b} - \frac{m(a^2 + a(b-m) + bm)r1}{b(a+b)^3}, \right. \\ \left. n \rightarrow nC, DAB \rightarrow \frac{m \left( (a+b)^2(a+b-m) - \frac{(a^2 + a(b-m) + bm)(b(b-m) + a(b+m))r1}{ab} \right)}{(a+b)^4}, DAC \rightarrow 0, DCB \rightarrow 0, DACB \rightarrow 0 \right\}$$

**Simplify[Series[Det[**

**(JEqWeakRecTilde /. ruleApplyEqWeakRecTilde) - x IdentityMatrix[7] /. x -> -m z],**  
**{m, 0, 1}], Assumptions -> {a >= 0, b >= 0, r1 >= 0, r2 >= 0}] // Normal**

**ab m (a+b+r1) (a+r1+r2)**

**(b^2 z + r2 (r1 (-1+z) + r2 (-1+z) + a z) + b ((a+r1) z + r2 (-1+2 z)))**

**Simplify[Solve[% == 0, z]]**

$$\left\{ \left\{ z \rightarrow \frac{r2(b+r1+r2)}{(b+r2)(a+b+r1+r2)} \right\} \right\}$$

Hence, we see that the effective migration rate does not only apply for weak migration, but also for weak recombination.

- Graphical exploration of approximation
- Generic

We compare the approximate effective migration rate to the exact (negative) eigenvalue of  $J_N$  computed numerically.

```

In[211]:= approxEffMigRateABCFunc[a_, b_, m_, r1_, r2_] := m  $\frac{r2 (b + r1 + r2)}{(b + r2) (a + b + r1 + r2)}$ 

In[212]:= exactEffMigRateABCFunc[a_, b_, m_, r1_, r2_] := Module[{JN}, JN = {{-m, a, b, 0}, { $\frac{m (-a^2 + b^2 + 6 a r1}{(b + r2) (a + b + r1 + r2)}$ }},
Return[-Max[Re[Eigenvalues[JN]]]]
]

mya = 0.002;
myb = 0.4;
mym = 0.0024;
myr1 = 0.01 * (10);
myr2 = 0.01 * (30);
{exactEffMigRateABCFunc[mya, myb, mym, myr1, myr2],
approxEffMigRateABCFunc[mya, myb, mym, myr1, myr2],
approxEffMigRateABCFunc[mya, myb, mym, myr1, myr2] /
exactEffMigRateABCFunc[mya, myb, mym, myr1, myr2] - 1}
{0.00102813, 0.00102601, -0.00206156}

```

The exact (blue) and approximate (red) effective migration rate:

```

Manipulate[Plot[{exactEffMigRateABCFunc[mya, myb, m, myr1, myr2],
  approxEffMigRateABCFunc[mya, myb, m, myr1, myr2]},
  {m, 0, mMax}, PlotRange -> {{0, mMax}, Automatic}, Frame -> True,
  FrameStyle -> Table[{Black, Opacity[0]}, {i, 1, 2}],
  FrameLabel -> {"Migration rate m", "Effective mig. rate"},
  LabelStyle -> {Directive[FontSize -> 14], FontFamily -> "Helvetica"}],
  {{mya, 0.02}, 0, 1}, {{myb, 0.4}, 0, 1}, {{myr1, 0.02}, 0, 1},
  {{myr2, 0.02}, 0, 1}, {{mMax, 0.1}, 0, 10}]

```

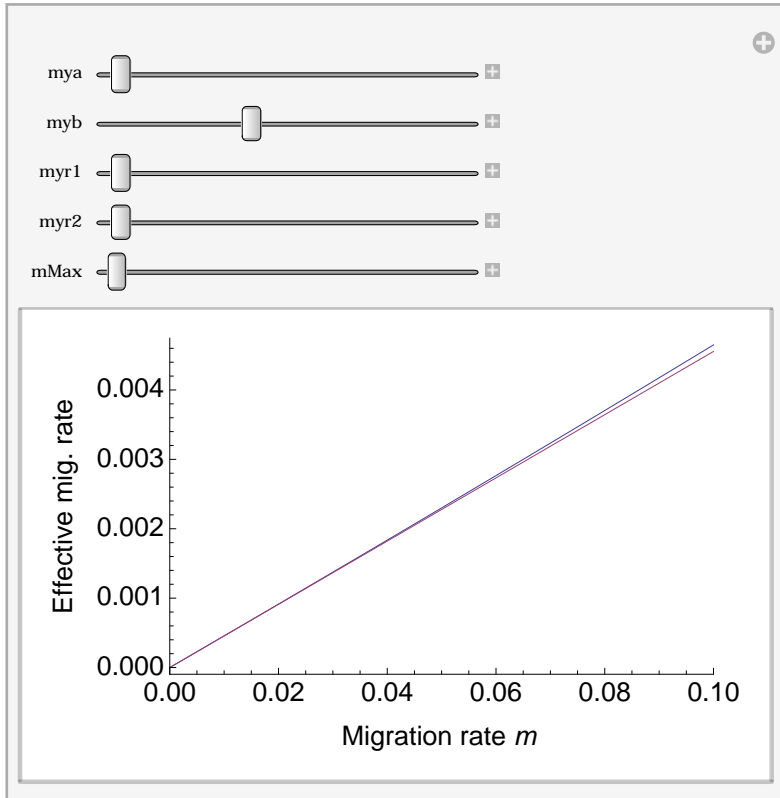

### ■ Remark

The only difference between configurations  $\mathcal{A} - C - B$  and  $\mathcal{A} - B - C$  seems to be in the fourth element of the fourth row of the respective Jacobian matrices  $J_N$ . We double check this in the following:

JMTestACB :=

$$\left\{ \{-m, a, b, 0\}, \left\{ m, -a - rAC + \frac{m(a-b+rAB)}{a+b+rAB}, 0, b \right\}, \left\{ m, 0, -b - rCB + \frac{m(b-a+rAB)}{a+b+rAB}, a \right\}, \right. \\ \left. \left\{ -m, \frac{m(b-a+rAB)}{a+b+rAB}, \frac{m(a-b+rAB)}{a+b+rAB}, -a-b-rAB + \frac{m(a+b+3rAB)}{a+b+rAB} \right\} \right\}$$

JMTestABC :=  $\left\{ \{-m, a, b, 0\}, \left\{ m, -a - rAC + \frac{m(a-b+rAB)}{a+b+rAB}, 0, b \right\}, \right.$

$$\left. \left\{ m, 0, -b - rCB + \frac{m(b-a+rAB)}{a+b+rAB}, a \right\}, \right.$$

$$\left. \left\{ -m, \frac{m(b-a+rAB)}{a+b+rAB}, \frac{m(a-b+rAB)}{a+b+rAB}, -a-b-rAC + \frac{m(a+b+3rAB)}{a+b+rAB} \right\} \right\}$$

FullSimplify[

$$\text{Normal} \left[ \text{Series} \left[ \text{Det}[\text{JMTestACB} - x \text{IdentityMatrix}[4]] /. x \rightarrow -m \frac{rAC rCB}{(a+rAC)(b+rCB)}, \right. \right.$$

$$\left. \left. \{m, 0, 1\} \right] \right] /. \{rAB \rightarrow rAC + rCB\}$$

0



```
FullSimplify[
  Normal[Series[Det[JMTTestABC - x IdentityMatrix[4]] /. x -> -m  $\frac{r_{CB} (b + r_{AC})}{(b + r_{CB}) (a + b + r_{AC})}$ ,
    {m, 0, 1}]]] /. {rAC -> rAB + rCB}
0
```

This confirms that the only difference is in the fourth element of the fourth row of the two matrices.

## Order of loci: $C-A-B$

For reasons of symmetry, we directly obtain

$$m_e = m \frac{r_1 (a + r_1 + r_2)}{(a + r_1)(a + b + r_1 + r_2)}. \quad (1)$$

- Graphical exploration of approximation
- Generic

We compare the approximate effective migration rate to the exact (negative) eigenvalue of  $J_N$  computed numerically.

```
In[213]= approxEffMigRateCABFunc[a_, b_, m_, r1_, r2_] := m  $\frac{r_1 (a + r_1 + r_2)}{(a + r_1) (a + b + r_1 + r_2)}$ 

In[214]= exactEffMigRateCABFunc[a_, b_, m_, r1_, r2_] := Module[{JN}, JN = {
  {-m, b, a, 0}, {
 $\frac{m (a^2 - b^2 + 6 b r_2 - r_1 (a + r_1 + r_2))}{(a + r_1) (a + b + r_1 + r_2)}$ 
}
};
Return[-Max[Re[Eigenvalues[JN]]]]

mya = 0.002;
myb = 0.4;
mym = 0.0024;
myr1 = 0.01 * (10);
myr2 = 0.01 * (30);
{exactEffMigRateCABFunc[mya, myb, mym, myr1, myr2],
approxEffMigRateCABFunc[mya, myb, mym, myr1, myr2],
approxEffMigRateCABFunc[mya, myb, mym, myr1, myr2] /
exactEffMigRateCABFunc[mya, myb, mym, myr1, myr2] - 1}
{0.000969913, 0.000592636, -0.38898}
```

The exact (blue) and approximate (red) effective migration rate:

```

Manipulate[Plot[{exactEffMigRateCABFunc[mya, myb, m, myr1, myr2],
  approxEffMigRateCABFunc[mya, myb, m, myr1, myr2]}, {m, 0, .1},
  Frame → True, FrameStyle → Table[{Black, Opacity[0]}, {i, 1, 2}],
  FrameLabel → {"Migration rate  $m$ ", "Effective mig. rate"},
  LabelStyle → {Directive[FontSize → 14], FontFamily → "Helvetica"}],
  {{mya, 0.02}, 0, 1}, {{myb, 0.4}, 0, 1}, {{myr1, 0.02}, 0, 1}, {{myr2, 0.02}, 0, 1}]

```

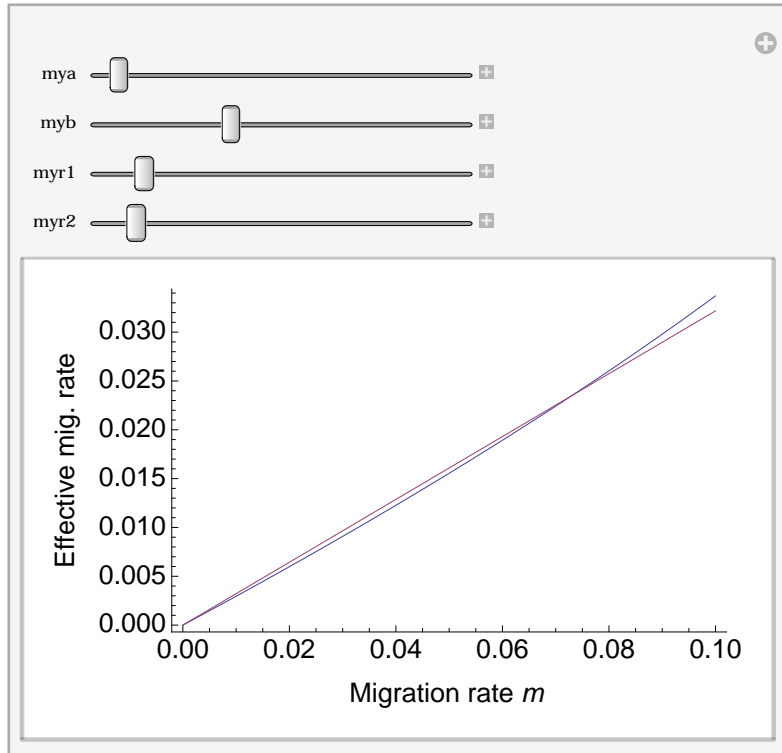

$$\begin{aligned}
& \left\{ \left\{ a - m - \frac{1}{4r_1} \left( -a^2 + b^2 + 6ar_1 - 4mr_1 - r_1^2 + (a-b+r_1) \sqrt{-8mr_1 + (a+b+r_1)^2} \right), 0, b, 0, 0, 0, \right. \right. \\
& \left. \left. 0 \right\}, \left\{ 0, b - m - \frac{1}{4r_1} \left( a^2 - b^2 + 6br_1 - 4mr_1 - r_1^2 + (-a+b+r_1) \sqrt{-8mr_1 + (a+b+r_1)^2} \right), \right. \right. \\
& \left. \left. a, 0, 0, 0, 0 \right\}, \left\{ \frac{1}{16br_1^2} \left( 8m^2r_1^2 + 4mr_1(a^2 + (b-r_1)^2 - 2a(b+r_1)) - \right. \right. \right. \\
& \quad (a-b-r_1)(a+b-r_1)(a-b+r_1) \left( a+b+r_1 - \sqrt{-8mr_1 + (a+b+r_1)^2} \right) + \\
& \quad \left. \left. 2mr_1 \left( a^2 - b^2 + 6br_1 - 4mr_1 - r_1^2 + (-a+b+r_1) \sqrt{-8mr_1 + (a+b+r_1)^2} \right) \right) \right\}, \\
& \frac{1}{16ar_1^2} \left( 8m^2r_1^2 + 4mr_1(a^2 + (b-r_1)^2 - 2a(b+r_1)) - \right. \\
& \quad (a-b-r_1)(a+b-r_1)(a-b+r_1) \left( a+b+r_1 - \sqrt{-8mr_1 + (a+b+r_1)^2} \right) + \\
& \quad \left. \left. 2mr_1 \left( -a^2 + b^2 + 6ar_1 - 4mr_1 - r_1^2 + (a-b+r_1) \sqrt{-8mr_1 + (a+b+r_1)^2} \right) \right) \right\}, \\
& \frac{1}{2} \left( -a - b + 2m - r_1 - \sqrt{-8mr_1 + (a+b+r_1)^2} \right), 0, 0, 0, 0 \left. \right\}, \{0, 0, 0, -m, a, b, 0\}, \\
& \left\{ 0, 0, 0, \frac{1}{8ar_1} m \left( -a^2 + b^2 + 6ar_1 - 4mr_1 - r_1^2 + (a-b+r_1) \sqrt{-8mr_1 + (a+b+r_1)^2} \right), \right. \\
& \left. a - m - r_1 - \frac{1}{4r_1} \left( -a^2 + b^2 + 6ar_1 - 4mr_1 - r_1^2 + (a-b+r_1) \sqrt{-8mr_1 + (a+b+r_1)^2} \right) - r_2, 0, \right. \\
& \left. b \right\}, \left\{ 0, 0, 0, \frac{1}{8br_1} m \left( a^2 - b^2 + 6br_1 - 4mr_1 - r_1^2 + (-a+b+r_1) \sqrt{-8mr_1 + (a+b+r_1)^2} \right), \right. \\
& \left. 0, b - m - \frac{1}{4r_1} \left( a^2 - b^2 + 6br_1 - 4mr_1 - r_1^2 + (-a+b+r_1) \sqrt{-8mr_1 + (a+b+r_1)^2} \right) - r_2, a \right\}, \\
& \left\{ 0, 0, 0, \frac{1}{64abr_1^2} m \left( - \left( -a^2 + b^2 + 6ar_1 - 4mr_1 - r_1^2 + (a-b+r_1) \sqrt{-8mr_1 + (a+b+r_1)^2} \right) \right. \right. \\
& \quad \left( a^2 - b^2 + 6br_1 - 4mr_1 - r_1^2 + (-a+b+r_1) \sqrt{-8mr_1 + (a+b+r_1)^2} \right) + \\
& \quad \left. \left. 2 \left( -8m^2r_1^2 - 4mr_1(a^2 + (b-r_1)^2 - 2a(b+r_1)) + \right. \right. \right. \\
& \quad \left. \left. (a-b-r_1)(a+b-r_1)(a-b+r_1) \left( a+b+r_1 - \sqrt{-8mr_1 + (a+b+r_1)^2} \right) \right) \right) \right\}, \\
& \frac{1}{16br_1^2} \left( 8m^2r_1^2 + 4mr_1(a^2 + (b-r_1)^2 - 2a(b+r_1)) - (a-b-r_1)(a+b-r_1) \right. \\
& \quad (a-b+r_1) \left( a+b+r_1 - \sqrt{-8mr_1 + (a+b+r_1)^2} \right) + \\
& \quad \left. \left. 2mr_1 \left( a^2 - b^2 + 6br_1 - 4mr_1 - r_1^2 + (-a+b+r_1) \sqrt{-8mr_1 + (a+b+r_1)^2} \right) \right) \right\}, \\
& \frac{1}{16ar_1^2} \left( 8m^2r_1^2 + 4mr_1(a^2 + (b-r_1)^2 - 2a(b+r_1)) - \right. \\
& \quad (a-b-r_1)(a+b-r_1)(a-b+r_1) \left( a+b+r_1 - \sqrt{-8mr_1 + (a+b+r_1)^2} \right) + \\
& \quad \left. \left. 2mr_1 \left( -a^2 + b^2 + 6ar_1 - 4mr_1 - r_1^2 + (a-b+r_1) \sqrt{-8mr_1 + (a+b+r_1)^2} \right) \right) \right\}, \\
& \frac{1}{2} \left( -a - b + 2m - r_1 - \sqrt{-8mr_1 + (a+b+r_1)^2} - 2r_2 \right) \left. \right\} /. \{r_1 \rightarrow r_2, r_2 \rightarrow r_1, a \rightarrow b, b \rightarrow a\}
\end{aligned}$$

$$\begin{aligned}
& \left\{ \left\{ b - m - \frac{1}{4 r^2} \left( a^2 - b^2 + 6 b r^2 - 4 m r^2 - r^2 + (-a + b + r^2) \sqrt{-8 m r^2 + (a + b + r^2)^2} \right), 0, a, 0, 0, 0, 0, \right. \right. \\
& \left. \left. 0 \right\}, \left\{ 0, a - m - \frac{1}{4 r^2} \left( -a^2 + b^2 + 6 a r^2 - 4 m r^2 - r^2 + (a - b + r^2) \sqrt{-8 m r^2 + (a + b + r^2)^2} \right), \right. \right. \\
& \left. \left. b, 0, 0, 0, 0 \right\}, \left\{ \frac{1}{16 a r^2} \left( 8 m^2 r^2 + 4 m r^2 (b^2 + (a - r^2)^2 - 2 b (a + r^2)) - \right. \right. \\
& \quad \left. \left. (-a + b - r^2) (a + b - r^2) (-a + b + r^2) \left( a + b + r^2 - \sqrt{-8 m r^2 + (a + b + r^2)^2} \right) + \right. \right. \\
& \quad \left. \left. 2 m r^2 \left( -a^2 + b^2 + 6 a r^2 - 4 m r^2 - r^2 + (a - b + r^2) \sqrt{-8 m r^2 + (a + b + r^2)^2} \right) \right) \right\}, \\
& \frac{1}{16 b r^2} \left( 8 m^2 r^2 + 4 m r^2 (b^2 + (a - r^2)^2 - 2 b (a + r^2)) - \right. \\
& \quad \left. (-a + b - r^2) (a + b - r^2) (-a + b + r^2) \left( a + b + r^2 - \sqrt{-8 m r^2 + (a + b + r^2)^2} \right) + \right. \\
& \quad \left. 2 m r^2 \left( a^2 - b^2 + 6 b r^2 - 4 m r^2 - r^2 + (-a + b + r^2) \sqrt{-8 m r^2 + (a + b + r^2)^2} \right) \right) \Bigg\}, \\
& \frac{1}{2} \left( -a - b + 2 m - r^2 - \sqrt{-8 m r^2 + (a + b + r^2)^2} \right), 0, 0, 0, 0 \Bigg\}, \{0, 0, 0, -m, b, a, 0\}, \\
& \left\{ 0, 0, 0, \frac{1}{8 b r^2} m \left( a^2 - b^2 + 6 b r^2 - 4 m r^2 - r^2 + (-a + b + r^2) \sqrt{-8 m r^2 + (a + b + r^2)^2} \right), \right. \\
& \left. b - m - r^1 - r^2 - \frac{1}{4 r^2} \left( a^2 - b^2 + 6 b r^2 - 4 m r^2 - r^2 + (-a + b + r^2) \sqrt{-8 m r^2 + (a + b + r^2)^2} \right), 0, a \right\}, \\
& \left\{ 0, 0, 0, \frac{1}{8 a r^2} m \left( -a^2 + b^2 + 6 a r^2 - 4 m r^2 - r^2 + (a - b + r^2) \sqrt{-8 m r^2 + (a + b + r^2)^2} \right), 0, \right. \\
& \left. a - m - r^1 - \frac{1}{4 r^2} \left( -a^2 + b^2 + 6 a r^2 - 4 m r^2 - r^2 + (a - b + r^2) \sqrt{-8 m r^2 + (a + b + r^2)^2} \right), b \right\}, \\
& \left\{ 0, 0, 0, \frac{1}{64 a b r^2} m \left( \left( -a^2 + b^2 + 6 a r^2 - 4 m r^2 - r^2 + (a - b + r^2) \sqrt{-8 m r^2 + (a + b + r^2)^2} \right) \right. \right. \\
& \quad \left. \left. \left( -a^2 + b^2 - 6 b r^2 + 4 m r^2 + r^2 - (-a + b + r^2) \sqrt{-8 m r^2 + (a + b + r^2)^2} \right) + \right. \right. \\
& \quad \left. \left. 2 \left( -8 m^2 r^2 - 4 m r^2 (b^2 + (a - r^2)^2 - 2 b (a + r^2)) + \right. \right. \right. \\
& \quad \left. \left. \left. (-a + b - r^2) (a + b - r^2) (-a + b + r^2) \left( a + b + r^2 - \sqrt{-8 m r^2 + (a + b + r^2)^2} \right) \right) \right) \right) \Bigg\}, \\
& \frac{1}{16 a r^2} \left( 8 m^2 r^2 + 4 m r^2 (b^2 + (a - r^2)^2 - 2 b (a + r^2)) - (-a + b - r^2) (a + b - r^2) \right. \\
& \quad \left. (-a + b + r^2) \left( a + b + r^2 - \sqrt{-8 m r^2 + (a + b + r^2)^2} \right) + \right. \\
& \quad \left. 2 m r^2 \left( -a^2 + b^2 + 6 a r^2 - 4 m r^2 - r^2 + (a - b + r^2) \sqrt{-8 m r^2 + (a + b + r^2)^2} \right) \right) \Bigg\}, \\
& \frac{1}{16 b r^2} \left( 8 m^2 r^2 + 4 m r^2 (b^2 + (a - r^2)^2 - 2 b (a + r^2)) - \right. \\
& \quad \left. (-a + b - r^2) (a + b - r^2) (-a + b + r^2) \left( a + b + r^2 - \sqrt{-8 m r^2 + (a + b + r^2)^2} \right) + \right. \\
& \quad \left. 2 m r^2 \left( a^2 - b^2 + 6 b r^2 - 4 m r^2 - r^2 + (-a + b + r^2) \sqrt{-8 m r^2 + (a + b + r^2)^2} \right) \right) \Bigg\}, \\
& \frac{1}{2} \left( -a - b + 2 m - 2 r^1 - r^2 - \sqrt{-8 m r^2 + (a + b + r^2)^2} \right) \Bigg\} \Bigg\}
\end{aligned}$$
