# Supplementary material
Source: PubMed Central journal article supplement (PMC4012489)
Supplement: supp_114.163477_TableS2.pdf [file supp_114.163477_TableS2.pdf]

**Table S2 The effect of assuming  $p_0$  small in the diffusion approximation of the mean absorption time.**

| $r$  | $m$   | $N_e = 100$ |        |             |        |             |        | $N_e = 10^3$ |        |             |        |             |        | $N_e = 10^4$ |        |             |        |             |        |
|------|-------|-------------|--------|-------------|--------|-------------|--------|--------------|--------|-------------|--------|-------------|--------|--------------|--------|-------------|--------|-------------|--------|
|      |       | $q_c = 0.2$ |        | $q_c = 0.5$ |        | $q_c = 0.8$ |        | $q_c = 0.2$  |        | $q_c = 0.5$ |        | $q_c = 0.8$ |        | $q_c = 0.2$  |        | $q_c = 0.5$ |        | $q_c = 0.8$ |        |
|      |       | $q_c = 0$   |        | $q_c = 0$   |        | $q_c = 0$   |        | $q_c = 0$    |        | $q_c = 0$   |        | $q_c = 0$   |        | $q_c = 0$    |        | $q_c = 0$   |        | $q_c = 0$   |        |
| 0.05 | 0.006 | 0.017       | 0.016  | 0.015       | 0.014  | 0.014       | 0.017  | 0.017        | 0.017  | 0.016       | 0.015  | 0.015       | 0.017  | 0.017        | 0.017  | 0.016       | 0.015  | 0.015       | 0.015  |
| 0.05 | 0.012 | 0.014       | 0.012  | 0.010       | 0.009  | 0.009       | 0.014  | 0.014        | 0.012  | 0.011       | 0.009  | 0.009       | 0.014  | 0.012        | 0.012  | 0.011       | 0.011  | 0.009       | 0.009  |
| 0.05 | 0.018 | 0.009       | 0.007  | 0.005       | 0.003  | 0.003       | 0.010  | 0.010        | 0.008  | 0.005       | 0.003  | 0.003       | 0.010  | 0.008        | 0.008  | 0.005       | 0.005  | 0.003       | 0.003  |
| 0.05 | 0.024 | 0.004       | 0.002  | 0.000       | -0.002 | -0.002      | 0.004  | 0.004        | 0.002  | 0.000       | -0.002 | -0.002      | 0.004  | 0.002        | 0.002  | 0.000       | 0.000  | -0.002      | -0.002 |
| 0.10 | 0.006 | 0.016       | 0.015  | 0.015       | 0.014  | 0.014       | 0.016  | 0.016        | 0.015  | 0.015       | 0.014  | 0.014       | 0.016  | 0.015        | 0.015  | 0.015       | 0.015  | 0.014       | 0.014  |
| 0.10 | 0.012 | 0.011       | 0.010  | 0.009       | 0.008  | 0.008       | 0.011  | 0.011        | 0.010  | 0.009       | 0.009  | 0.009       | 0.011  | 0.010        | 0.010  | 0.009       | 0.009  | 0.009       | 0.009  |
| 0.10 | 0.018 | 0.005       | 0.005  | 0.004       | 0.002  | 0.002       | 0.006  | 0.006        | 0.005  | 0.004       | 0.003  | 0.003       | 0.006  | 0.005        | 0.005  | 0.004       | 0.004  | 0.003       | 0.003  |
| 0.10 | 0.024 | 0.000       | -0.001 | -0.002      | -0.003 | -0.003      | 0.000  | 0.000        | -0.001 | -0.002      | -0.003 | -0.003      | 0.000  | -0.001       | -0.002 | -0.002      | -0.002 | -0.003      | -0.003 |
| 0.20 | 0.006 | 0.015       | 0.015  | 0.014       | 0.014  | 0.014       | 0.015  | 0.015        | 0.015  | 0.015       | 0.015  | 0.014       | 0.015  | 0.015        | 0.015  | 0.015       | 0.015  | 0.014       | 0.014  |
| 0.20 | 0.012 | 0.009       | 0.009  | 0.008       | 0.008  | 0.008       | 0.010  | 0.010        | 0.009  | 0.009       | 0.009  | 0.008       | 0.010  | 0.009        | 0.009  | 0.009       | 0.009  | 0.008       | 0.008  |
| 0.20 | 0.018 | 0.004       | 0.003  | 0.003       | 0.002  | 0.002       | 0.004  | 0.004        | 0.003  | 0.003       | 0.003  | 0.002       | 0.004  | 0.004        | 0.004  | 0.003       | 0.003  | 0.002       | 0.002  |
| 0.20 | 0.024 | -0.002      | -0.002 | -0.003      | -0.003 | -0.003      | -0.002 | -0.002       | -0.002 | -0.003      | -0.003 | -0.003      | -0.002 | -0.002       | -0.002 | -0.003      | -0.003 | -0.003      | -0.003 |

The relative error  $\bar{t}_{QLE}/\bar{t}_{QLE} - 1$  is tabulated. The initial frequency of the focal mutant  $A_1$  is  $p_0 = 1/(2N)$  (we assumed  $N_e = N$ ). Other parameters are  $a = 0.02$  and  $b = 0.04$ . For a graphical representation, see Figure S13A.
