# Supplementary material
Source: PubMed Central journal article supplement (PMC4012489)
Supplement: supp_114.163477_TableS3.pdf [file supp_114.163477_TableS3.pdf]

**Table S3 The effect of assuming  $\rho$  large in  $M(\rho)$  when deriving the diffusion approximation to the mean absorption time.**

| $r$  | $m$   | $N_e = 100$ |             |             |             | $N_e = 10^3$        |                     |             |             | $N_e = 10^4$           |                        |                        |                     |
|------|-------|-------------|-------------|-------------|-------------|---------------------|---------------------|-------------|-------------|------------------------|------------------------|------------------------|---------------------|
|      |       | $q_c = 0$   | $q_c = 0.2$ | $q_c = 0.5$ | $q_c = 0.8$ | $q_c = 0$           | $q_c = 0.2$         | $q_c = 0.5$ | $q_c = 0.8$ | $q_c = 0$              | $q_c = 0.2$            | $q_c = 0.5$            | $q_c = 0.8$         |
| 0.05 | 0.006 | 3.818       | 1.995       | 0.770       | 0.211       | $6.558 \times 10^5$ | $1.892 \times 10^4$ | 242.595     | 6.217       | $1.397 \times 10^{57}$ | $1.503 \times 10^{42}$ | $4.312 \times 10^{23}$ | $3.395 \times 10^8$ |
| 0.05 | 0.012 | 1.391       | 0.901       | 0.382       | 0.106       | $1.288 \times 10^4$ | $2.086 \times 10^3$ | 77.967      | 3.411       | $8.300 \times 10^{40}$ | $1.700 \times 10^{33}$ | $1.534 \times 10^{19}$ | $4.275 \times 10^6$ |
| 0.05 | 0.018 | 0.280       | 0.299       | 0.167       | 0.054       | 27.006              | 41.590              | 5.361       | 0.371       | $6.349 \times 10^{14}$ | $1.583 \times 10^{17}$ | $1.140 \times 10^{10}$ | 448.323             |
| 0.05 | 0.024 | 0.025       | 0.118       | 0.092       | 0.035       | -0.014              | 0.620               | 0.235       | 0.056       | -0.427                 | $1.367 \times 10^4$    | 1.808                  | 0.075               |
| 0.10 | 0.006 | 0.404       | 0.301       | 0.169       | 0.060       | 22.759              | 11.577              | 3.772       | 0.843       | $3.891 \times 10^{13}$ | $7.582 \times 10^{10}$ | $5.379 \times 10^6$    | 435.536             |
| 0.10 | 0.012 | 0.149       | 0.129       | 0.080       | 0.030       | 4.922               | 4.152               | 1.995       | 0.539       | $5.884 \times 10^7$    | $1.595 \times 10^7$    | $7.357 \times 10^4$    | 86.049              |
| 0.10 | 0.018 | 0.033       | 0.048       | 0.037       | 0.015       | 0.372               | 0.565               | 0.292       | 0.073       | 48.506                 | 487.778                | 88.493                 | 3.323               |
| 0.10 | 0.024 | 0.003       | 0.022       | 0.022       | 0.010       | -0.008              | 0.038               | 0.037       | 0.015       | -0.029                 | 0.077                  | 0.053                  | 0.018               |
| 0.20 | 0.006 | 0.083       | 0.067       | 0.042       | 0.017       | 1.181               | 0.915               | 0.528       | 0.191       | $2.241 \times 10^3$    | 623.130                | 66.327                 | 4.677               |
| 0.20 | 0.012 | 0.027       | 0.027       | 0.019       | 0.008       | 0.439               | 0.442               | 0.313       | 0.125       | 39.447                 | 41.132                 | 15.525                 | 2.415               |
| 0.20 | 0.018 | 0.006       | 0.010       | 0.009       | 0.004       | 0.029               | 0.056               | 0.044       | 0.017       | 0.643                  | 1.783                  | 1.417                  | 0.405               |
| 0.20 | 0.024 | 0.000       | 0.005       | 0.006       | 0.003       | -0.001              | 0.006               | 0.008       | 0.004       | -0.003                 | 0.008                  | 0.010                  | 0.005               |

The relative error  $\tilde{t}_{\text{QIE}, \rho \gg 0} / \tilde{t}_{\text{QIE}} - 1$  is tabulated. The initial frequency of the focal mutant  $A_1$  is  $p_0 = 1/(2N)$  (we assumed  $N_e = N$ ). Other parameters are  $a = 0.02$  and  $b = 0.04$ . For a graphical representation, see Figure S13B.
