# Supplementary material
Source: PubMed Central journal article supplement (PMC4012489)
Supplement: supp_114.163477_TableS5.pdf [file supp_114.163477_TableS5.pdf]

**Table S5** The mean absorption time under the QLE approximation relative to the one without linkage.

| $r$  | $m$   | $N_e = 100$ |             |             |             |                        |                     |                     |                     |                         |                         |                         |                         |
|------|-------|-------------|-------------|-------------|-------------|------------------------|---------------------|---------------------|---------------------|-------------------------|-------------------------|-------------------------|-------------------------|
|      |       | $q_c = 0$   | $q_c = 0.2$ | $q_c = 0.5$ | $q_c = 0.8$ | $q_c = 0$              | $q_c = 0.2$         | $q_c = 0.5$         | $q_c = 0.8$         | $q_c = 0$               | $q_c = 0.2$             | $q_c = 0.5$             | $q_c = 0.8$             |
| 0.05 | 0.006 | 3.887       | 2.738       | 1.763       | 1.228       | $1.377 \times 10^6$    | $4.280 \times 10^4$ | 468.965             | 9.837               | $1.037 \times 10^{181}$ | $1.053 \times 10^{166}$ | $3.122 \times 10^{146}$ | $5.560 \times 10^{129}$ |
| 0.05 | 0.012 | 2.563       | 1.897       | 1.386       | 1.116       | $3.898 \times 10^{10}$ | $7.261 \times 10^8$ | $8.047 \times 10^6$ | 2.895 $\times 10^5$ | $3.186 \times 10^{94}$  | $1.105 \times 10^{77}$  | $1.511 \times 10^{57}$  | $2.154 \times 10^{42}$  |
| 0.05 | 0.018 | 1.679       | 1.407       | 1.187       | 1.059       | $2.092 \times 10^4$    | $1.212 \times 10^3$ | 118.033             | 46.914              | $5.463 \times 10^{38}$  | $3.218 \times 10^{25}$  | $1.172 \times 10^{13}$  | $1.268 \times 10^6$     |
| 0.05 | 0.024 | 1.335       | 1.224       | 1.111       | 1.037       | 246.649                | 150.044             | 111.839             | 97.857              | NA                      | NA                      | NA                      | NA                      |
| 0.10 | 0.006 | 2.183       | 1.815       | 1.418       | 1.140       | $4.032 \times 10^3$    | 608.988             | 45.294              | 4.288               | $6.045 \times 10^{155}$ | $4.043 \times 10^{147}$ | $2.273 \times 10^{136}$ | $1.374 \times 10^{126}$ |
| 0.10 | 0.012 | 1.580       | 1.403       | 1.209       | 1.071       | $5.262 \times 10^7$    | $9.268 \times 10^6$ | $9.804 \times 10^5$ | $1.497 \times 10^5$ | $2.960 \times 10^{65}$  | $6.234 \times 10^{57}$  | $6.338 \times 10^{47}$  | $2.248 \times 10^{39}$  |
| 0.10 | 0.018 | 1.256       | 1.189       | 1.104       | 1.037       | 224.875                | 118.051             | 60.712              | 41.759              | $7.771 \times 10^{16}$  | $1.157 \times 10^{13}$  | $2.039 \times 10^8$     | $1.085 \times 10^5$     |
| 0.10 | 0.024 | 1.131       | 1.109       | 1.064       | 1.024       | 116.181                | 111.037             | 102.175             | 95.712              | NA                      | NA                      | NA                      | NA                      |
| 0.20 | 0.006 | 1.519       | 1.386       | 1.218       | 1.079       | 91.941                 | 34.912              | 8.699               | 2.325               | $2.582 \times 10^{139}$ | $1.660 \times 10^{135}$ | $1.588 \times 10^{129}$ | $3.019 \times 10^{123}$ |
| 0.20 | 0.012 | 1.247       | 1.188       | 1.108       | 1.040       | $1.550 \times 10^6$    | $7.361 \times 10^5$ | $2.525 \times 10^5$ | $9.391 \times 10^4$ | $6.923 \times 10^{99}$  | $3.274 \times 10^{96}$  | $5.148 \times 10^{81}$  | $1.717 \times 10^{77}$  |
| 0.20 | 0.018 | 1.112       | 1.091       | 1.055       | 1.021       | 63.566                 | 55.483              | 45.480              | 38.849              | $4.712 \times 10^8$     | $3.624 \times 10^7$     | $6.508 \times 10^5$     | $2.380 \times 10^4$     |
| 0.20 | 0.024 | 1.059       | 1.054       | 1.035       | 1.014       | 101.157                | 100.356             | 97.307              | 94.249              | NA                      | NA                      | NA                      | NA                      |

Tabulated is the ratio  $\bar{t}_{QLE}/\bar{t}_{OLM}$ . The initial frequency of the focal mutant  $A_1$  is  $p_0 = 1/(2N)$  (we assumed  $N_e = N$ ). Other parameters are  $a = 0.02$  and  $b = 0.04$ . NA denotes cases where  $\bar{t}_{OLM}$  is numerically indistinguishable from 0 and hence the ratio  $\bar{t}_{QLE}/\bar{t}_{OLM}$  not defined.
