# Supplementary material
Source: PubMed Central journal article supplement (PMC4012489)
Supplement: supp_114.163477_TableS6.pdf [file supp_114.163477_TableS6.pdf]

**Table S6** The error of  $\tilde{t}_{\text{QLE}}$  relative to  $\bar{t}_{\text{QLE}}$  as in Table S2, but for  $p_0 = 0.005$  fixed instead of  $p_0 = 1/(2N)$ .

| $r$  | $m$   | $N_e = 100$ |             |             |             | $N_e = 10^3$ |             |             |             | $N_e = 10^4$ |             |             |             |
|------|-------|-------------|-------------|-------------|-------------|--------------|-------------|-------------|-------------|--------------|-------------|-------------|-------------|
|      |       | $q_c = 0$   | $q_c = 0.2$ | $q_c = 0.5$ | $q_c = 0.8$ | $q_c = 0$    | $q_c = 0.2$ | $q_c = 0.5$ | $q_c = 0.8$ | $q_c = 0$    | $q_c = 0.2$ | $q_c = 0.5$ | $q_c = 0.8$ |
| 0.05 | 0.006 | 0.017       | 0.016       | 0.015       | 0.014       | 0.182        | 0.174       | 0.163       | 0.153       | 2.551        | 2.418       | 2.239       | 2.079       |
| 0.05 | 0.012 | 0.014       | 0.012       | 0.010       | 0.009       | 0.144        | 0.128       | 0.108       | 0.092       | 1.943        | 1.690       | 1.389       | 1.144       |
| 0.05 | 0.018 | 0.009       | 0.007       | 0.005       | 0.003       | 0.099        | 0.077       | 0.051       | 0.030       | 1.249        | 0.934       | 0.599       | 0.347       |
| 0.05 | 0.024 | 0.004       | 0.002       | 0.000       | -0.002      | 0.042        | 0.020       | -0.004      | -0.023      | 0.492        | 0.229       | -0.039      | -0.175      |
| 0.10 | 0.006 | 0.016       | 0.015       | 0.015       | 0.014       | 0.166        | 0.162       | 0.156       | 0.150       | 2.297        | 2.228       | 2.131       | 2.039       |
| 0.10 | 0.012 | 0.011       | 0.010       | 0.009       | 0.008       | 0.115        | 0.108       | 0.097       | 0.088       | 1.490        | 1.379       | 1.227       | 1.088       |
| 0.10 | 0.018 | 0.005       | 0.005       | 0.004       | 0.002       | 0.059        | 0.050       | 0.037       | 0.025       | 0.698        | 0.590       | 0.434       | 0.295       |
| 0.10 | 0.024 | 0.000       | -0.001      | -0.002      | -0.003      | 0.000        | -0.005      | -0.016      | -0.027      | -0.003       | -0.047      | -0.131      | -0.199      |
| 0.20 | 0.006 | 0.015       | 0.015       | 0.014       | 0.014       | 0.157        | 0.155       | 0.152       | 0.148       | 2.148        | 2.113       | 2.062       | 2.012       |
| 0.20 | 0.012 | 0.009       | 0.009       | 0.008       | 0.008       | 0.099        | 0.096       | 0.090       | 0.085       | 1.250        | 1.200       | 1.124       | 1.050       |
| 0.20 | 0.018 | 0.004       | 0.003       | 0.003       | 0.002       | 0.038        | 0.035       | 0.029       | 0.022       | 0.445        | 0.404       | 0.331       | 0.257       |
| 0.20 | 0.024 | -0.002      | -0.002      | -0.003      | -0.003      | -0.018       | -0.019      | -0.024      | -0.029      | -0.141       | -0.149      | -0.181      | -0.215      |

The relative error is computed as  $\tilde{t}_{\text{QLE}}/\bar{t}_{\text{QLE}} - 1$ . It quantifies the effect of assuming  $p_0$  small in the derivation of the diffusion approximation of the mean absorption time. Other parameters are  $\alpha = 0.02$  and  $b = 0.04$ . For a graphical representation, see Figure S13D.
