# Supplementary material
Source: PubMed Central journal article supplement (PMC4012489)
Supplement: supp_114.163477_TableS7.pdf [file supp_114.163477_TableS7.pdf]

**Table S7** The error of  $\tilde{f}_{\text{QLE}, \rho \gg 0}$  relative to  $\tilde{f}_{\text{QLE}}$  as in Table S3, but for  $p_0 = 0.005$  fixed instead of  $p_0 = 1/(2N)$ .

| $r$  | $m$   | $N_e = 10^3$ |             |             |             |                     |                     |             |             |                        |                        |                        |                     |
|------|-------|--------------|-------------|-------------|-------------|---------------------|---------------------|-------------|-------------|------------------------|------------------------|------------------------|---------------------|
|      |       | $N_e = 100$  |             |             |             | $N_e = 10^3$        |                     |             |             | $N_e = 10^4$           |                        |                        |                     |
|      |       | $q_c = 0$    | $q_c = 0.2$ | $q_c = 0.5$ | $q_c = 0.8$ | $q_c = 0$           | $q_c = 0.2$         | $q_c = 0.5$ | $q_c = 0.8$ | $q_c = 0$              | $q_c = 0.2$            | $q_c = 0.5$            | $q_c = 0.8$         |
| 0.05 | 0.006 | 3.818        | 1.995       | 0.770       | 0.211       | $6.508 \times 10^5$ | $1.879 \times 10^4$ | 241.353     | 6.201       | $1.336 \times 10^{57}$ | $1.441 \times 10^{42}$ | $4.175 \times 10^{23}$ | $3.344 \times 10^8$ |
| 0.05 | 0.012 | 1.391        | 0.901       | 0.382       | 0.106       | $1.278 \times 10^4$ | $2.064 \times 10^3$ | 77.230      | 3.392       | $7.871 \times 10^{40}$ | $1.579 \times 10^{33}$ | $1.430 \times 10^{19}$ | $4.120 \times 10^6$ |
| 0.05 | 0.018 | 0.280        | 0.299       | 0.167       | 0.054       | 26.941              | 41.405              | 5.751       | 0.457       | $6.210 \times 10^{14}$ | $1.430 \times 10^{17}$ | $1.010 \times 10^{10}$ | 419.102             |
| 0.05 | 0.024 | 0.025        | 0.118       | 0.092       | 0.035       | -0.011              | 0.830               | 0.347       | 0.086       | -0.393                 | $1.274 \times 10^4$    | 4.193                  | 0.192               |
| 0.10 | 0.006 | 0.404        | 0.301       | 0.169       | 0.060       | 22.709              | 11.552              | 3.765       | 0.842       | $3.840 \times 10^{13}$ | $7.486 \times 10^{10}$ | $5.327 \times 10^6$    | 433.553             |
| 0.10 | 0.012 | 0.149        | 0.129       | 0.080       | 0.030       | 4.909               | 4.137               | 1.987       | 0.537       | $5.790 \times 10^7$    | $1.559 \times 10^7$    | $7.196 \times 10^4$    | 85.052              |
| 0.10 | 0.018 | 0.033        | 0.048       | 0.037       | 0.015       | 0.388               | 0.611               | 0.342       | 0.092       | 48.191                 | 472.445                | 85.111                 | 3.239               |
| 0.10 | 0.024 | 0.003        | 0.022       | 0.022       | 0.010       | -0.010              | 0.056               | 0.056       | 0.023       | -0.058                 | 0.174                  | 0.131                  | 0.046               |
| 0.20 | 0.006 | 0.083        | 0.067       | 0.042       | 0.017       | 1.179               | 0.914               | 0.528       | 0.191       | $2.233 \times 10^3$    | 620.925                | 66.145                 | 4.670               |
| 0.20 | 0.012 | 0.027        | 0.027       | 0.019       | 0.008       | 0.438               | 0.441               | 0.312       | 0.125       | 39.267                 | 40.862                 | 15.423                 | 2.404               |
| 0.20 | 0.018 | 0.006        | 0.010       | 0.009       | 0.004       | 0.034               | 0.067               | 0.055       | 0.022       | 0.640                  | 1.758                  | 1.391                  | 0.401               |
| 0.20 | 0.024 | 0.000        | 0.005       | 0.006       | 0.003       | -0.002              | 0.010               | 0.012       | 0.006       | -0.006                 | 0.020                  | 0.024                  | 0.012               |

The relative error is computed as  $\tilde{f}_{\text{QLE}, \rho \gg 0} / \tilde{f}_{\text{QLE}} - 1$ . It quantifies the effect of assuming  $\rho$  very large in  $\mathcal{M}(\rho)$  when deriving the diffusion approximation of the mean absorption time. Other parameters are  $\alpha = 0.02$  and  $b = 0.04$ . For a graphical representation, see Figure S13E.
