# Supplementary material
Source: PubMed Central journal article supplement (PMC4012489)
Supplement: supp_114.163477_TableS8.pdf [file supp_114.163477_TableS8.pdf]

**Table S8** The error of  $\tilde{t}_{\text{QLE},\rho \gg 0}$  relative to  $\tilde{t}_{\text{QLE},\rho \gg 0}$  as in Table S4, but for  $p_0 = 0.005$  fixed instead of  $p_0 = 1/(2N)$ .

| $r$  | $m$   | $N_e = 10^4$ |             |             |             |              |             |             |             |              |             |             |             |        |        |
|------|-------|--------------|-------------|-------------|-------------|--------------|-------------|-------------|-------------|--------------|-------------|-------------|-------------|--------|--------|
|      |       | $N_e = 100$  |             |             |             | $N_e = 10^3$ |             |             |             | $N_e = 10^4$ |             |             |             |        |        |
|      |       | $q_c = 0$    | $q_c = 0.2$ | $q_c = 0.5$ | $q_c = 0.8$ | $q_c = 0$    | $q_c = 0.2$ | $q_c = 0.5$ | $q_c = 0.8$ | $q_c = 0$    | $q_c = 0.2$ | $q_c = 0.5$ | $q_c = 0.8$ |        |        |
| 0.05 | 0.006 | 0.018        | 0.017       | 0.016       | 0.015       | 0.015        | 0.019       | 0.192       | 0.183       | 0.169        | 0.156       | 2.716       | 2.569       | 2.347  | 2.126  |
| 0.05 | 0.012 | 0.015        | 0.013       | 0.011       | 0.009       | 0.009        | 0.009       | 0.154       | 0.141       | 0.120        | 0.097       | 2.107       | 1.900       | 1.566  | 1.226  |
| 0.05 | 0.018 | 0.010        | 0.009       | 0.006       | 0.006       | 0.006        | 0.004       | 0.102       | 0.092       | 0.068        | 0.038       | 1.298       | 1.145       | 0.806  | 0.443  |
| 0.05 | 0.024 | 0.003        | 0.003       | 0.001       | 0.001       | 0.001        | -0.002      | 0.035       | 0.035       | 0.013        | -0.015      | 0.410       | 0.410       | 0.141  | -0.120 |
| 0.10 | 0.006 | 0.016        | 0.016       | 0.015       | 0.015       | 0.015        | 0.014       | 0.169       | 0.164       | 0.158        | 0.151       | 2.342       | 2.271       | 2.162  | 2.053  |
| 0.10 | 0.012 | 0.011        | 0.010       | 0.009       | 0.009       | 0.009        | 0.008       | 0.118       | 0.111       | 0.101        | 0.090       | 1.531       | 1.435       | 1.277  | 1.113  |
| 0.10 | 0.018 | 0.006        | 0.005       | 0.004       | 0.004       | 0.004        | 0.003       | 0.060       | 0.055       | 0.042        | 0.028       | 0.709       | 0.642       | 0.491  | 0.323  |
| 0.10 | 0.024 | 0.000        | 0.000       | -0.001      | -0.001      | -0.001       | -0.003      | -0.002      | -0.002      | -0.011       | -0.024      | -0.016      | -0.016      | -0.096 | -0.183 |
| 0.20 | 0.006 | 0.015        | 0.015       | 0.014       | 0.014       | 0.014        | 0.014       | 0.158       | 0.155       | 0.152        | 0.149       | 2.160       | 2.124       | 2.071  | 2.016  |
| 0.20 | 0.012 | 0.009        | 0.009       | 0.009       | 0.008       | 0.008        | 0.008       | 0.100       | 0.097       | 0.091        | 0.086       | 1.260       | 1.214       | 1.138  | 1.057  |
| 0.20 | 0.018 | 0.004        | 0.003       | 0.003       | 0.003       | 0.003        | 0.002       | 0.038       | 0.036       | 0.030        | 0.023       | 0.447       | 0.416       | 0.346  | 0.266  |
| 0.20 | 0.024 | -0.002       | -0.002      | -0.002      | -0.002      | -0.002       | -0.003      | -0.018      | -0.018      | -0.023       | -0.029      | -0.143      | -0.143      | -0.173 | -0.211 |

The relative error is computed as  $\tilde{t}_{\text{QLE},\rho \gg 0} / \tilde{t}_{\text{QLE},\rho \gg 0} - 1$ . It quantifies the effect of assuming  $p_0$  small, given the assumption of  $\rho$  large in  $M(p)$  when deriving the diffusion approximation of the mean absorption time. Other parameters are  $\alpha = 0.02$  and  $b = 0.04$ . For a graphical representation, see Figure S13F.
