# Supplementary material
Source: PubMed Central journal article supplement (PMC4012489)
Supplement: supp_114.163477_TableS9.pdf [file supp_114.163477_TableS9.pdf]

**Table S9** The ratio  $\bar{t}_{QLE}/\bar{t}_{OLM}$  as in Table S5, but for  $p_0 = 0.005$  instead of  $p_0 = 1/(2N)$ .

| $r$  | $m$   | $N_e = 10^4$ |             |             |             |                        |                     |                     |                     |                         |                         |                         |                         |  |  |  |
|------|-------|--------------|-------------|-------------|-------------|------------------------|---------------------|---------------------|---------------------|-------------------------|-------------------------|-------------------------|-------------------------|--|--|--|
|      |       | $N_e = 100$  |             |             |             |                        | $N_e = 10^3$        |                     |                     |                         |                         | $N_e = 10^4$            |                         |  |  |  |
|      |       | $q_c = 0$    | $q_c = 0.2$ | $q_c = 0.5$ | $q_c = 0.8$ | $q_c = 0$              | $q_c = 0.2$         | $q_c = 0.5$         | $q_c = 0.8$         | $q_c = 0$               | $q_c = 0.2$             | $q_c = 0.5$             | $q_c = 0.8$             |  |  |  |
| 0.05 | 0.006 | 3.887        | 2.738       | 1.763       | 1.228       | $1.340 \times 10^6$    | $4.191 \times 10^4$ | 463.139             | 9.790               | $2.964 \times 10^{180}$ | $3.124 \times 10^{165}$ | $9.765 \times 10^{145}$ | $1.828 \times 10^{129}$ |  |  |  |
| 0.05 | 0.012 | 2.563        | 1.897       | 1.386       | 1.116       | $3.451 \times 10^{10}$ | $6.511 \times 10^8$ | $7.330 \times 10^6$ | $2.672 \times 10^5$ | $1.095 \times 10^{94}$  | $4.148 \times 10^{76}$  | $6.376 \times 10^{56}$  | $1.011 \times 10^{42}$  |  |  |  |
| 0.05 | 0.018 | 1.679        | 1.407       | 1.187       | 1.059       | $2.634 \times 10^4$    | $1.542 \times 10^3$ | 141.905             | 49.620              | $2.614 \times 10^{38}$  | $1.786 \times 10^{25}$  | $7.849 \times 10^{12}$  | $1.006 \times 10^6$     |  |  |  |
| 0.05 | 0.024 | 1.335        | 1.224       | 1.111       | 1.037       | 351.786                | 190.096             | 126.558             | 103.788             | NA                      | NA                      | NA                      | NA                      |  |  |  |
| 0.10 | 0.006 | 2.183        | 1.815       | 1.418       | 1.140       | $3.971 \times 10^3$    | 601.729             | 44.963              | 4.276               | $1.858 \times 10^{155}$ | $1.269 \times 10^{147}$ | $7.351 \times 10^{135}$ | $4.574 \times 10^{125}$ |  |  |  |
| 0.10 | 0.012 | 1.580        | 1.403       | 1.209       | 1.071       | $4.768 \times 10^7$    | $8.447 \times 10^6$ | $9.010 \times 10^5$ | $1.386 \times 10^5$ | $1.199 \times 10^{65}$  | $2.641 \times 10^{57}$  | $2.866 \times 10^{47}$  | $1.083 \times 10^{39}$  |  |  |  |
| 0.10 | 0.018 | 1.256        | 1.189       | 1.104       | 1.037       | 280.052                | 142.014             | 67.583              | 42.921              | $4.907 \times 10^{16}$  | $7.793 \times 10^{12}$  | $1.521 \times 10^8$     | $8.927 \times 10^4$     |  |  |  |
| 0.10 | 0.024 | 1.131        | 1.109       | 1.064       | 1.024       | 133.739                | 125.264             | 110.775             | 100.350             | NA                      | NA                      | NA                      | NA                      |  |  |  |
| 0.20 | 0.006 | 1.519        | 1.386       | 1.218       | 1.079       | 91.196                 | 34.687              | 8.664               | 2.321               | $8.305 \times 10^{138}$ | $5.399 \times 10^{134}$ | $5.247 \times 10^{128}$ | $1.014 \times 10^{123}$ |  |  |  |
| 0.20 | 0.012 | 1.247        | 1.188       | 1.108       | 1.040       | $1.423 \times 10^6$    | $6.775 \times 10^5$ | $2.333 \times 10^5$ | $8.711 \times 10^4$ | $3.099 \times 10^{49}$  | $1.498 \times 10^{46}$  | $2.439 \times 10^{41}$  | $8.426 \times 10^{36}$  |  |  |  |
| 0.20 | 0.018 | 1.112        | 1.091       | 1.055       | 1.021       | 71.310                 | 60.791              | 47.766              | 39.139              | $3.490 \times 10^8$     | $2.761 \times 10^7$     | $5.223 \times 10^5$     | $1.997 \times 10^4$     |  |  |  |
| 0.20 | 0.024 | 1.059        | 1.054       | 1.035       | 1.014       | 109.131                | 107.834             | 102.913             | 98.013              | NA                      | NA                      | NA                      | NA                      |  |  |  |

Here,  $\bar{t}_{QLE}$  is the mean absorption time assuming quasi-linkage equilibrium (QLE), and  $\bar{t}_{OLM}$  the one for the one-locus model (no linkage). Parameters are  $a = 0.02$  and  $b = 0.04$ . NA denotes cases where  $\bar{t}_{OLM}$  is numerically indistinguishable from 0 and hence the ratio  $\bar{t}_{QLE}/\bar{t}_{OLM}$  not defined.
